# Supplementary material for: A dynamic subset of network interactions underlies tuning to natural movements in marmoset sensorimotor cortex
Source: Springer Nature journal article supplement (doi:10.1038/s41467-024-54343-6), 2024-12-03
Supplement: MOESM4 [file 41467_2024_54343_MOESM4_ESM.xlsx]

## Sheet: Fig1d_reachFN1
			0	8.54912e-06	0.000180243	0.000394842	4.52686e-05	1.0341e-05	1.96559e-05	2.42194e-05	1.04885e-05	1.51928e-09	0.000216525	0.000130335	2.02305e-05	2.32166e-05	5.01495e-06	6.51284e-06	0.000361607	0.00033505	4.95685e-06	0.000122598	0.000159903	2.22419e-07	0.000360614	0.000311889	0.000194947	0.000299932	2.47595e-05	5.17711e-05	0.000349569	1.87003e-07	3.49688e-06	9.21429e-05	5.46512e-05	0.000201688	4.12262e-06	2.53124e-05	0.000131572	7.6058e-06	5.81091e-05	9.93822e-05	3.92811e-05	5.30801e-05	0.000213928	0.000123618	0.000159497	5.80494e-05	1.24011e-05
			3.08499e-05	0	2.58485e-05	2.13259e-06	2.91359e-07	0.000281093	1.431e-05	0.000146571	0.000416082	0.000150907	7.44108e-06	1.73048e-05	0.000738065	0.000138522	7.44188e-06	4.43307e-05	0.000424427	6.64994e-05	6.58536e-05	4.87307e-06	0.000220622	0.000141822	0.00025604	0.000293637	0.000216871	4.24816e-06	0.00023181	6.27273e-06	0.000131757	0.000232343	5.25483e-05	0.000222982	0.000131483	5.54805e-05	0.000410861	0.000694713	0.000192229	0.00040206	0.000203743	1.32081e-05	2.65569e-05	0.000120343	8.73199e-05	1.15945e-05	0.000412045	0.000235653	3.62826e-06
			3.58511e-05	1.07593e-06	0	2.04031e-05	0.000102333	4.47074e-06	6.05636e-07	2.15577e-07	1.27868e-05	7.40966e-05	6.03873e-06	0.000188519	0.000108272	4.34873e-05	3.12516e-05	9.64615e-05	3.22203e-05	7.33908e-06	4.62328e-08	3.50345e-07	0.00015552	8.01628e-05	3.43175e-06	2.87212e-06	5.21164e-07	1.63122e-05	2.36537e-07	3.74872e-06	5.5611e-05	0.000101862	2.06325e-05	0.000477596	0.000536995	0.000482361	0.00010775	6.15314e-05	0.000405333	2.48152e-08	0.000184444	0.000143295	1.84945e-07	0.000276826	4.15348e-05	0.000232809	1.17419e-05	1.75001e-05	0.00011812
			0.000430375	0.000100107	0.000128029	0	7.79432e-06	3.74628e-05	1.02182e-05	0.000206253	0.000289196	5.51569e-05	0.000317929	0.000193045	0.00101544	0.000244726	0.000196591	5.80636e-06	2.62548e-05	0.000385643	6.84747e-06	1.1445e-05	3.103e-05	0.000309463	6.11111e-05	3.40239e-05	6.35302e-05	0.000317951	6.5343e-05	5.38212e-05	0.000269057	8.80172e-09	8.67577e-05	9.13551e-05	3.6788e-05	0.000160342	6.53569e-05	2.13761e-05	0.000302033	0.000204408	0.000676296	0.000179762	1.81128e-05	0.000160851	0.000185301	0.000154489	0.000632322	4.17213e-05	0.000943123
			2.61852e-05	3.8909e-06	1.02421e-07	1.3316e-05	0	8.30311e-05	0.000219916	0.000119773	9.50798e-05	5.11677e-05	5.72418e-07	5.52008e-05	1.46046e-05	0.000303481	9.72742e-05	0.000286906	0.000234471	4.95652e-06	4.04227e-05	1.08815e-05	2.60815e-06	0.000268646	2.64578e-05	0.000535833	3.59006e-06	8.777e-06	0.000113871	2.51101e-07	0.000158666	2.26292e-05	0.000240286	1.31712e-05	2.46877e-05	1.98751e-05	0.000127796	0.000165226	0.000181851	8.05044e-05	0.000492278	0.000204594	0.00016148	2.52427e-06	5.91429e-06	4.55688e-05	6.04593e-07	4.32243e-05	1.40982e-05
			0.000117891	0.000225819	2.16175e-05	0.000108536	0.000175469	0	2.54541e-05	1.00735e-06	8.68382e-05	6.89618e-06	1.38448e-05	9.26429e-05	0.000272716	4.49676e-05	0.000100201	1.55382e-05	0.000160683	9.65636e-05	0.000106756	0.000294683	0.000339298	5.98449e-05	0.000176505	0.000265394	5.2162e-07	0.00014899	0.000838989	0.000204328	0.00206303	0.00152096	0.000152711	0.000274501	0.000218938	3.00628e-05	0.000597813	0.00021577	3.40026e-05	8.46343e-05	9.35891e-06	0.000881114	2.11505e-06	3.23533e-05	0.00034569	3.24354e-05	7.71355e-05	4.3431e-08	0.00180676
			6.41527e-05	5.65971e-05	1.51146e-05	1.46973e-05	0.000140572	0.000107453	0	3.01618e-05	2.54332e-05	0.000111288	6.75781e-05	4.66844e-06	2.86136e-05	7.46739e-05	0.000128603	1.64976e-05	0.000548956	5.01351e-06	2.02269e-05	0.000275006	6.76123e-05	0.000797912	2.09491e-05	0.000705585	8.12864e-05	4.65394e-05	0.00027672	6.28974e-05	1.15312e-05	0.000944445	0.000169909	2.24535e-07	0.000621987	0.000108376	2.18196e-05	0.000399279	9.06332e-06	0.000289666	0.00029135	2.08516e-05	0.000110139	1.77708e-05	6.41781e-05	0.000442865	0.000159801	3.55312e-05	0.000508599
			2.79304e-06	2.3132e-05	4.0776e-05	9.06262e-05	4.5381e-05	6.40716e-06	3.80525e-05	0	0.00130698	9.06424e-05	0.000119603	0.00025191	6.68407e-08	0.00014276	0.000628828	0.000171271	0.000562853	4.24616e-05	6.2191e-05	0.000224944	2.01012e-05	2.26917e-06	0.000496513	0.000176775	3.54019e-05	5.71983e-05	0.00021772	3.39352e-05	0.00254952	8.41949e-06	1.97547e-05	6.31812e-06	0.000352498	0.000108223	0.000943671	0.000280624	3.90109e-06	0.000323591	3.03915e-06	4.14477e-05	0.000258855	7.012e-05	5.8915e-06	0.000349086	0.000156336	1.34002e-05	3.45854e-05
			8.01583e-05	1.61766e-05	8.72506e-07	3.89644e-05	3.73947e-05	2.98604e-05	3.39131e-05	0.00171907	0	0.000104211	9.45245e-05	2.06599e-06	0.00040421	7.42466e-05	0.000282264	1.78618e-05	0.000378378	6.71204e-05	4.35769e-06	6.12309e-05	1.32876e-05	0.000285583	0.000378867	0.000217371	0.000158353	0.000298636	0.000552579	0.000258411	0.00511409	0.000195158	5.76865e-05	7.44133e-06	2.02474e-05	8.52115e-05	0.00116762	0.000550841	1.88581e-05	6.84474e-05	0.000589453	9.35668e-05	0.00090443	0.000102255	0.000392824	0.000385486	0.000356981	0.000277812	0.000130742
			4.568e-06	0.000102787	0.00012976	1.72243e-05	2.9702e-05	1.62083e-06	1.8842e-05	1.09728e-09	0.000185899	0	0.00062163	0.000295538	2.73186e-06	7.30759e-07	1.74201e-05	1.12769e-06	0.000461412	6.53997e-06	0.000102626	5.13095e-05	0.00024687	7.01907e-06	5.40584e-05	7.44434e-05	9.11243e-05	6.11766e-08	5.09828e-06	3.72332e-05	3.34469e-05	2.66361e-05	0.00052088	6.06874e-06	0.00028884	2.48322e-05	0.000253749	2.73899e-05	6.09564e-05	0.000223575	4.53581e-05	0.000336173	0.000189837	9.73784e-06	1.03806e-06	4.46846e-06	0.000252939	0.000588632	1.29067e-06
			5.08032e-09	2.1087e-05	2.71546e-05	0.000377928	2.93487e-05	4.17364e-05	8.31988e-05	3.00888e-05	2.94028e-05	6.00452e-05	0	3.33212e-06	7.1537e-05	0.000553228	0.000467151	0.000198546	9.38212e-05	0.000385539	0.000158588	8.43233e-06	3.0438e-05	0.000329664	0.000443716	0.000553614	3.03975e-07	8.19766e-05	0.00015085	0.000931347	5.93112e-05	5.60574e-05	0.000292949	0.00106155	5.17972e-05	6.4777e-05	3.10334e-06	0.000209301	0.00347532	0.000948892	3.95246e-05	3.08006e-05	0.000196021	0.00217518	0.000131707	0.00280351	0.00106155	0.00198276	0.000495728
			0.000276431	2.30708e-05	1.02155e-05	0.000133261	6.89976e-06	6.22075e-05	9.69141e-06	0.000118916	3.14019e-05	0.000679389	2.70024e-06	0	0.000478866	0.000307734	0.000796562	0.000363401	6.1231e-05	0.000270136	8.33232e-05	2.58812e-07	1.92418e-06	0.00045872	7.54274e-07	0.000187023	0.000295849	0.00136321	0.000394503	0.000138728	0.00161616	5.63374e-05	0.000806827	0.000120634	3.28677e-06	0.000136291	0.00132561	0.000925265	4.2039e-05	0.00018968	0.000256318	0.00101771	0.000492666	0.000594123	0.000137732	0.000987257	0.000162858	3.08807e-05	3.2426e-05
			9.86243e-05	0.000381253	0.000407957	0.000550762	9.05641e-05	2.95502e-05	0.000209503	6.76971e-06	0.000786783	0.00019023	8.1205e-05	0.000171991	0	2.46314e-05	0.000174748	3.59805e-05	0.000212417	4.94001e-08	6.24166e-06	0.000793724	4.93564e-05	1.63558e-05	7.85364e-07	0.000144676	0.000228709	5.27981e-05	0.000267664	0.00104966	3.29077e-05	0.000610203	2.55491e-05	0.00137744	0.000486064	0.000246539	0.000137489	0.000820356	3.29561e-05	4.94557e-07	0.00027346	1.73419e-05	0.0020922	0.000574618	0.000152062	5.71805e-05	0.000720424	0.00111821	0.000259605
			6.12723e-06	4.86898e-05	1.21594e-06	0.00016326	3.68171e-05	8.70508e-07	1.63862e-05	1.46153e-05	0.000317764	9.12103e-05	0.000439505	2.56509e-06	0.000162219	0	0.000775844	1.15774e-06	0.00015724	0.000275322	0.000173931	0.000217997	1.42281e-05	5.00498e-05	0.000503198	0.000898407	1.79987e-05	0.00151218	8.97689e-06	0.000336487	4.58605e-05	9.55287e-05	0.00109515	0.000779881	0.000104986	0.000814063	0.000557872	0.000584688	0.000285541	0.000565325	0.000633108	0.000435235	0.00013539	0.00150452	0.000759669	6.16632e-06	0.000685778	0.000402837	1.69262e-06
			0.000176795	0.000119428	2.85682e-07	0.000218615	3.90346e-05	0.000153787	0.000342009	0.000135221	0.000165104	3.58404e-05	0.000237222	0.000596484	0.000147827	0.00160452	0	0.000628523	0.000580034	0.0005818	2.57019e-05	5.22828e-06	5.43798e-06	0.000579489	6.81227e-05	0.000879939	6.06108e-07	0.00129042	7.3556e-05	1.69911e-05	0.00115601	0.000431619	0.00017773	1.3275e-05	0.000517509	1.99754e-06	0.00186418	0.00115227	0.000728955	0.00221456	0.000673171	0.000212418	1.41234e-05	0.00087418	0.000251004	5.7882e-05	0.00115782	0.00104874	2.10361e-06
			1.24498e-07	8.91461e-07	7.14578e-05	0.000147624	0.000290614	0.000439774	3.32286e-05	1.96595e-05	4.91652e-05	7.25811e-05	0.000252929	0.000264228	0.000324981	1.29742e-05	8.75556e-05	0	1.55812e-07	1.99642e-05	0.000247652	0.000833038	0.000313651	0.000286812	1.50784e-05	2.65858e-05	0.000245464	0.00119155	3.82751e-05	0.000821948	0.000907057	0.000354013	0.000579327	1.37083e-05	0.000773127	0.000838668	6.55276e-05	3.60008e-05	0.00132068	0.00057297	0.000444993	0.00285927	4.99256e-05	7.88151e-05	0.000715661	7.72785e-05	0.000636985	0.000852417	0.000220647
			0.000113146	0.00024533	0.000158491	0.000477309	5.43716e-07	0.000529447	0.000311064	0.00035403	0.000439626	4.31526e-05	6.57743e-06	1.0942e-06	0.000587824	8.07286e-05	0.000513884	1.42835e-06	0	0.00105735	0.000460164	0.000433993	0.000612273	7.24172e-05	0.000978826	0.000631219	0.000123649	0.000690412	7.81829e-05	9.70358e-05	2.3649e-05	0.000725001	0.000867596	5.00843e-05	0.000438516	0.000395031	0.000487548	0.00181741	0.000103287	4.96935e-05	4.62429e-05	4.47648e-05	0.00175529	0.00127506	0.000571991	0.000211158	0.00175435	0.000194865	0.000979972
			8.32306e-09	2.24214e-09	7.46376e-06	0.000423259	6.83231e-05	9.21727e-05	4.24203e-06	0.00020933	0.000154083	3.19548e-05	0.000873604	3.42637e-06	1.61194e-06	0.000460975	0.00080665	0.000106117	0.00112706	0	4.67659e-06	8.4029e-05	0.00055687	4.68131e-05	0.000291868	0.00141663	2.2422e-05	0.00469267	0.000630691	0.000789436	9.83739e-05	6.83794e-05	0.00137169	0.000453015	5.70242e-07	0.00135059	0.000437122	0.000168054	6.92421e-07	0.000695605	0.000181821	0.00147053	0.000463138	0.00103998	0.00268741	0.00038101	0.00172152	8.6161e-07	8.18192e-05
			0.000100034	3.43063e-05	2.60861e-05	1.20351e-05	1.35648e-06	5.68678e-05	1.14415e-05	3.34342e-06	8.16536e-06	0.000777535	0.000317305	5.25517e-05	2.19026e-05	0.000135552	2.39572e-05	0.000187478	0.000761487	5.76435e-05	0	0.00063558	9.6936e-05	5.90492e-05	8.07196e-05	1.93934e-06	0.000313469	8.7859e-05	0.000375785	0.00125212	9.57174e-05	3.69508e-05	3.34574e-07	6.10532e-06	0.000357777	0.000452811	9.12323e-06	0.000714164	3.48815e-06	0.000155008	0.000131128	1.50234e-05	0.000448063	2.11667e-05	6.96253e-05	0.000287905	0.000345113	0.000599904	0.000799236
			0.000201061	9.41299e-05	6.98472e-05	7.75311e-05	5.44859e-05	0.00014394	0.000474709	0.000147253	5.97412e-05	6.5147e-06	0.000411941	5.55734e-05	0.00119027	3.47087e-05	1.13845e-06	0.00127819	0.000394483	0.000142125	0.000658709	0	7.13259e-05	0.000651956	0.000970541	0.000436735	1.75387e-05	4.34528e-06	0.000841844	0.00186412	3.52918e-05	1.17883e-05	2.7754e-05	0.000868413	0.00101626	0.000685613	0.000191407	0.000252972	6.47499e-06	5.99494e-05	3.8461e-06	0.00348006	0.000116269	1.80306e-05	0.000171933	0.000721466	2.87586e-05	0.0012141	0.00174787
			0.000219744	0.000193579	0.000128017	5.37172e-06	0.000293152	0.000376951	2.87929e-05	3.37669e-06	8.5673e-07	0.000373717	0.00013403	8.11896e-05	3.11868e-05	4.07279e-06	1.05713e-07	5.56483e-05	0.000655228	0.00137251	1.8482e-05	2.26182e-05	0	0.000167672	0.000189836	3.73017e-05	0.00035893	6.00685e-05	0.00170083	0.000363999	0.000774467	0.000379053	0.000170955	1.90887e-05	0.000345131	6.41574e-05	0.00060162	0.000209523	7.01784e-05	0.000193983	0.000145598	5.73125e-05	0.000493145	0.000616271	0.000153086	0.000560948	3.09816e-06	6.9385e-06	0.000543781
			3.35964e-05	4.42209e-05	0.000245982	0.000383504	0.000144948	2.0737e-05	0.000757304	1.52724e-05	0.000364672	3.96761e-05	0.000996963	0.000254648	1.1506e-06	1.13168e-06	0.000522205	8.87251e-05	3.43669e-05	7.96173e-06	1.43082e-06	0.000657088	3.84365e-08	0	7.05823e-05	4.97848e-06	0.000573374	0.00014749	0.000721477	0.00198549	0.000780989	0.000190503	2.98713e-05	0.00028717	0.000386265	0.000862876	6.77675e-06	5.10163e-06	0.00138018	0.000939943	0.000440945	0.000301386	3.2079e-05	0.000261597	1.20765e-05	0.00019965	0.000249383	0.000906096	0.000365102
			3.13358e-05	0.000141739	5.31351e-05	4.03746e-05	0.000108503	1.49042e-07	1.76686e-05	0.000683664	0.000499816	2.9248e-05	0.000787087	1.03756e-05	4.23333e-05	0.000533766	0.00012632	4.77232e-05	0.000693233	0.000291249	0.000211508	0.000294959	5.4505e-05	7.50658e-05	0	0.00219703	2.64003e-05	0.000158383	3.61261e-07	3.26117e-05	0.000106583	4.54818e-05	0.00141098	1.27646e-06	4.50785e-05	4.60727e-05	0.00114343	3.09372e-05	0.000295299	0.000267296	7.16334e-05	0.000313136	0.000385313	0.000102477	0.000644971	0.00154456	0.00291996	0.00162846	0.000134526
			3.88953e-05	0.000221624	3.47324e-06	3.93618e-05	0.000307605	8.4741e-05	0.000479894	5.89851e-07	0.000192611	2.77101e-05	0.000588176	4.8164e-05	0.000583832	0.00121668	0.000670132	0.000112646	0.000204393	0.000653156	2.9564e-05	4.71839e-05	9.83872e-06	3.69873e-06	0.00240326	0	3.06995e-06	0.00034645	9.61188e-06	0.000134871	0.000113849	0.000712846	0.00177291	0.000159301	6.31636e-05	2.07074e-06	0.000121585	0.000132083	0.000257292	0.000405126	0.00225416	0.000659698	6.70917e-06	0.00100346	0.00183714	0.00212547	0.00468607	0.000616015	1.97244e-07
			0.000321014	5.37826e-05	5.46978e-06	8.52032e-08	9.31711e-06	2.21113e-05	6.94546e-05	1.74635e-07	6.01508e-07	1.73333e-05	2.483e-07	6.14296e-05	0.000335043	6.63027e-05	0.000228736	0.00013675	0.000209951	4.17757e-07	8.93141e-05	1.72175e-06	0.000170718	0.000727563	0.000197315	6.08179e-05	0	8.37254e-07	0.000585418	3.35589e-06	0.00028534	0.000510277	0.000313606	9.28321e-06	0.000687326	0.000180905	0.000671665	0.000573098	2.00929e-06	7.48157e-05	0.000136265	8.77716e-06	0.000761742	1.36725e-06	1.31097e-06	6.04426e-06	4.10786e-05	0.000336422	0.000371285
			2.94701e-05	1.16628e-05	3.27298e-05	0.000155783	0.000109275	0.000100659	0.000175944	3.69216e-06	7.8111e-05	3.05038e-05	0.000103403	0.00042777	7.95205e-05	0.00199385	0.00109134	0.00146682	0.00102698	0.00435364	9.22369e-05	0.000135062	3.78118e-05	0.000364195	0.000298253	0.000564231	4.99823e-06	0	0.000302787	0.000839656	5.40154e-05	0.000185979	0.00195135	0.000190304	0.000863234	6.74528e-05	0.000866553	0.000947668	0.00103102	0.000751639	4.42717e-07	0.00304595	0.000190169	0.000181533	0.00694159	0.000694521	0.000881373	0.000719387	0.000564238
			6.92827e-06	3.98661e-06	2.54427e-05	0.000285723	0.000317602	0.000438828	0.000504102	0.000657422	0.00157049	5.02412e-05	7.94797e-05	3.49461e-05	0.000341713	1.93603e-05	4.2785e-05	0.000266378	3.01838e-05	0.00129303	0.000196603	0.000466785	0.00192084	0.000627407	1.33322e-05	2.36089e-05	0.000249242	0.000329237	0	7.86486e-07	0.000220785	0.000275628	0.00103225	0.000434128	0.000168615	0.000399636	8.93802e-05	3.23147e-05	0.000101786	1.3772e-06	5.08862e-07	0.00308515	3.63212e-05	0.000269628	0.00253902	0.00195341	0.000305342	0.00011959	0.00171252
			8.91593e-05	0.000109612	9.52972e-05	0.000201218	3.26015e-05	0.000685526	6.4316e-05	0.000213083	0.000128602	3.21481e-05	0.00121564	0.000104062	0.00170847	0.00028161	1.97539e-06	0.00021281	0.000164707	0.000721111	0.00126533	0.00221981	9.69925e-06	0.00239811	2.08721e-06	1.99724e-06	2.24661e-08	3.24988e-05	1.09864e-05	0	0.000155072	3.40719e-05	1.56606e-05	0.00249637	0.000157737	0.000145661	2.20557e-05	0.000462887	0.00302319	0.00337507	0.000263932	0.000915158	4.15579e-05	0.00183246	0.000279733	1.33371e-06	5.30458e-06	0.000863563	0.00211291
			0.000492459	0.00037254	5.26603e-05	0.000239194	0.000760388	0.000671231	5.35961e-05	0.00156484	0.00508658	1.34908e-06	4.82998e-06	0.00136571	3.21396e-05	4.35114e-07	0.000728178	0.000601977	2.99799e-05	0.000281141	4.15935e-05	0.000120037	0.000350021	0.000757013	0.000223934	0.000283837	0.000306025	4.35411e-05	5.18394e-05	0.000320857	0	5.49766e-05	7.88959e-05	0.000401708	2.40915e-08	3.27757e-06	0.000855107	0.000805152	7.59022e-05	0.000247277	8.29708e-05	2.83976e-07	0.00124408	0.00169687	0.00110884	0.000380308	0.000376799	1.22309e-05	9.94697e-05
			4.51186e-07	6.41096e-05	2.3295e-05	3.67203e-05	2.62388e-05	0.00141314	0.00096043	5.85615e-07	0.000498555	3.1251e-05	0.000103878	1.45147e-05	0.000475987	4.35321e-05	0.000477094	0.000424189	7.78298e-05	0.000121926	3.23652e-05	0.000284742	0.000520105	0.000204366	6.84739e-05	0.000576162	0.00050962	0.000430636	0.000869846	7.9892e-05	3.64316e-05	0	0.00178474	0.000987308	8.52214e-05	0.000136173	0.00186336	1.36301e-05	4.57908e-05	3.01038e-05	0.000895787	9.07185e-05	1.64712e-05	0.0021775	3.79878e-05	0.00305145	0.00240654	0.000898345	0.00199243
			0.000293228	3.16731e-07	1.9135e-07	0.000510825	0.000219701	5.55491e-05	0.000137519	1.22198e-08	5.50688e-05	0.000122647	0.000555379	0.000455842	9.93974e-05	0.00184371	0.000107558	0.00122482	0.000456862	0.00182535	3.57643e-06	7.45848e-10	5.4331e-05	3.53607e-06	0.00152876	0.00157686	0.000294078	0.00107184	0.000680843	6.93275e-05	8.41314e-05	0.0025281	0	0.000128499	0.000671588	0.00143987	0.000123088	0.000474585	0.000769814	0.000441048	0.000434618	0.00617097	0.00096148	0.000397722	0.00755837	0.000896097	0.00301572	0.0015719	1.53808e-09
			8.9483e-06	0.000208438	0.000216078	5.12714e-05	3.75392e-05	0.000505224	0.000171079	7.305e-06	4.79884e-05	0.000147802	0.00110247	2.43339e-05	0.00115526	0.00051294	1.88968e-07	0.000299681	8.52879e-05	0.000283051	3.2617e-06	0.000646194	2.0327e-05	5.36062e-06	2.33372e-05	0.00012537	4.31098e-06	3.41779e-05	0.000281441	0.00247008	0.000290944	0.000828006	8.57149e-05	0	0.000918419	0.0016497	2.95399e-06	0.000893132	0.000882438	0.000111121	0.000417682	5.05334e-05	9.95047e-05	0.00259586	4.05238e-08	0.000537939	0.000309664	0.000546046	0.000430955
			6.76635e-05	0.000371057	0.000210745	0.000252043	5.41427e-07	0.000280749	0.000146794	0.000127007	9.84788e-05	0.000195657	0.000415251	0.000171246	0.000125086	0.000309026	0.000616839	0.000538963	0.000990838	0.000108131	0.000640749	0.000454734	0.000342324	0.000251909	4.14013e-05	0.000166379	0.00193223	0.00085597	0.000171998	3.00957e-05	0.000154346	1.54477e-07	0.00105572	0.000377591	0	0.000224112	0.000804143	0.00275763	0.00077473	0.000274869	0.00163874	0.000849185	2.10176e-05	0.000714806	0.000804052	0.000239657	0.000691108	0.00082911	0.000425964
			1.90361e-05	3.28257e-05	0.000135143	7.09153e-09	8.41807e-08	2.00105e-06	5.83729e-08	5.98706e-05	0.000111386	7.79332e-06	1.66236e-06	2.49716e-05	3.88743e-05	0.000150308	8.32476e-05	0.000846582	0.000766328	0.000847437	0.000152525	6.07561e-05	1.49352e-05	0.000489957	6.77442e-07	0.00012028	0.000174162	1.05782e-07	0.000924381	0.000133778	8.6605e-05	0.000277457	0.000844815	0.00174092	0.000721124	0	0.000128447	0.000218133	2.31435e-06	0.000347195	0.00016808	0.00374604	0.00100852	0.000608874	0.00109481	0.000754401	0.00029955	2.54627e-08	0.000351894
			1.05573e-07	0.000112854	9.99554e-05	0.000554814	0.000368464	0.000392599	2.1067e-05	0.000402455	0.000250007	0.000289211	8.73138e-06	0.00170114	0.000115389	0.000895841	0.000292963	7.1975e-05	0.000665802	0.000908951	7.25798e-06	8.23468e-05	0.000286436	2.34048e-05	0.000967941	0.000599068	0.000493245	0.00134653	1.24038e-05	1.01669e-05	0.000290967	0.00152434	0.000172806	6.04252e-05	0.000124523	7.13148e-05	0	0.00076949	0.00107197	2.61402e-05	0.00159124	4.55371e-05	0.00110397	0.00192939	0.00193741	0.00023288	0.000320703	4.91072e-07	0.0011113
			7.66275e-05	0.000866108	7.93757e-05	8.33105e-05	5.74833e-05	2.31361e-05	0.000248214	6.84168e-05	0.000281202	2.36864e-06	0.000159217	0.000264843	0.000586932	0.000465236	0.00109155	8.35898e-05	0.000945304	0.000498715	0.000100243	3.64653e-07	4.99408e-05	3.76901e-06	0.000164561	0.000247112	0.000784852	0.000766853	8.58445e-06	9.19731e-05	0.000484839	3.26889e-05	0.00116182	0.000250153	0.0012229	0.000348973	0.001111	0	0.000499068	1.94673e-07	0.000781757	0.00012566	0.000570652	9.13408e-05	0.000411484	0.000204358	0.000452634	0.00134	3.83469e-06
			0.000133683	0.000216976	7.11418e-05	5.2147e-07	2.91833e-06	3.23563e-05	5.70351e-07	0.000144356	3.26047e-05	5.48223e-07	0.00441529	0.000135284	8.26358e-05	1.02588e-05	0.000676336	0.000556037	0.000308791	0.000171015	3.76023e-05	1.80211e-05	4.18453e-05	0.00170122	9.82578e-05	0.00145202	2.59958e-06	0.00249491	0.000337055	0.00174606	1.17398e-06	0.000178192	0.000113982	0.0016724	0.000598367	1.95285e-05	0.000807561	0.00045177	0	0.00384125	2.11919e-06	0.000430368	0.000140292	0.000877614	6.35257e-05	0.00494892	0.000832998	0.00236442	0.000727325
			0.000118258	0.000173321	3.44458e-05	0.000270452	2.53008e-05	9.69146e-05	6.10057e-05	0.000544093	0.000441404	1.88588e-05	0.00105605	1.02393e-05	1.51864e-06	0.00035861	0.00208843	0.00220804	4.81141e-05	0.000824872	2.77412e-06	6.15974e-05	1.72788e-05	0.00103068	6.15568e-05	0.000332196	0.000165775	0.00131666	8.99172e-05	0.00309234	0.00101598	0.000102971	0.000580106	0.000105542	3.7839e-05	0.000744415	1.46427e-05	9.99193e-06	0.00334917	0	3.56461e-06	4.51995e-05	3.0522e-07	1.14195e-05	1.44377e-06	0.00554082	0.000561953	0.00257115	0.000397307
			2.21603e-05	2.67092e-05	0.000130213	5.21963e-05	0.000296756	7.22281e-07	0.000240023	2.36665e-05	0.000766677	0.000130808	0.000224658	2.32165e-05	0.000581755	0.000347284	0.00048136	0.000461624	8.2905e-05	7.22223e-05	0.000304699	0.000393752	1.51808e-05	2.11423e-05	1.87188e-05	0.00188819	0.000502994	2.21686e-05	5.44117e-05	0.000234675	0.000232015	0.0010425	0.000363692	0.000278784	0.00144043	6.80996e-05	0.00149346	0.00133378	4.03721e-05	1.42483e-06	0	0.000209998	0.00140809	0.00046108	8.35063e-09	4.3755e-05	0.000878949	5.95143e-06	0.000115287
			6.59606e-05	1.50442e-05	0.000163151	7.64868e-05	5.16306e-05	0.000827877	4.60974e-06	0.00026733	1.18797e-05	0.00100287	0.000600937	0.00119934	0.000140701	0.00015212	0.000204259	0.00553751	0.000293213	0.00142716	0.000127625	0.00207445	2.61845e-06	5.49543e-05	0.000259671	0.00013273	4.39959e-05	0.00174434	0.00200293	0.000834122	3.40849e-05	0.000100828	0.00536663	6.80321e-06	0.00112857	0.00260597	6.32232e-05	7.72486e-06	5.78815e-05	3.25376e-06	0.000616301	0	0.000358315	2.45684e-05	0.0056853	2.45092e-06	0.00136281	0.00125042	0.000145294
			8.45163e-06	3.97248e-05	3.53699e-07	0.000443437	2.51198e-05	2.52008e-06	0.000120116	0.000228135	0.000897709	0.000169542	0.000464198	0.0005692	0.00084023	0.000150838	3.46108e-05	3.24719e-05	0.00281589	0.000324713	9.67129e-05	4.57934e-05	0.000605694	6.91604e-05	0.00020179	8.18099e-08	0.000265483	6.07386e-05	0.0003267	0.000332967	0.00101736	0.000330539	0.00127847	1.06064e-05	0.000407937	0.000805763	0.00117047	0.0011551	0.000718771	2.91626e-05	0.000453847	0.000896852	0	6.20945e-05	4.00642e-06	0.00140843	0.000268762	0.000114827	0.000205291
			1.38042e-07	4.25627e-07	3.87309e-08	0.00069511	3.41257e-05	0.000227852	0.000212454	1.38667e-07	6.7279e-05	3.67612e-05	0.00198572	0.000471142	0.000617942	0.00200197	0.000626017	5.20685e-05	0.00175268	0.000520851	4.86875e-05	1.30353e-05	0.000200022	0.000388315	8.04558e-05	0.00102031	1.45306e-08	0.000527518	2.72027e-05	0.000938263	0.000688828	0.00210666	0.000263552	0.00206292	0.000925111	0.000885289	0.00030735	0.000351805	0.00124928	4.99623e-06	9.10654e-05	6.10539e-05	0.000346851	0	1.6954e-05	0.00023207	0.000655417	2.3499e-05	1.31888e-05
			8.05773e-05	2.91229e-07	2.03752e-05	0.000190448	3.35121e-06	0.000256106	0.000217282	3.67636e-05	0.00115928	0.000125839	9.86906e-05	5.96082e-06	7.5335e-06	0.00124692	0.000341599	0.000425383	0.00109089	0.00175294	7.46128e-06	0.000558297	0.000140516	1.16009e-05	0.000320629	0.00182497	4.40991e-05	0.007442	0.00212761	0.000362392	0.000501272	1.45051e-06	0.0075869	1.46023e-05	0.000978057	0.000797856	0.000763457	0.000184362	1.28055e-05	0.000113017	6.22618e-05	0.00683485	4.583e-06	6.49773e-05	0	0.000223774	0.00148931	0.00226516	0.000537353
			2.18272e-11	1.0853e-05	0.000329026	3.57329e-05	0.000191712	2.218e-05	4.20201e-05	0.000183508	0.000341375	4.91612e-05	0.0028091	0.000969618	0.000138884	2.64579e-05	1.97541e-06	7.92728e-05	1.74721e-05	3.78572e-05	0.000148287	0.000351611	0.00103692	3.70126e-05	0.0014657	0.00202871	3.40829e-05	0.000203566	0.00157572	8.07821e-06	0.000499769	0.00157601	0.000300322	0.000538584	0.000208429	0.000405067	0.000249625	8.59612e-05	0.00583546	0.00403826	7.49673e-05	1.20464e-07	0.00130136	0.000930108	0.000149131	0	0.00411694	0.00145463	0.000776901
			0.000741611	0.000470578	7.81137e-07	0.000386482	0.000106201	4.64954e-05	5.78945e-05	8.74933e-08	0.000351514	0.000115291	0.00296627	1.96722e-05	0.00103926	0.000905942	0.00130532	0.000397646	0.00105862	0.00102826	4.7757e-05	0.000198056	1.3481e-05	0.000298691	0.00215663	0.0062108	7.84542e-06	0.00269163	0.000101284	0.000332999	0.000625624	0.00117788	0.00204707	0.000286103	0.000557648	7.52649e-05	0.000334627	0.00120632	0.000599546	0.00140751	0.00149981	0.00225937	0.000525088	0.00193621	0.00182325	0.0031909	0	0.00231824	2.4265e-05
			0.000177514	0.000209047	1.6069e-05	4.62679e-06	5.67808e-05	2.19546e-06	8.13774e-08	1.08754e-05	5.86253e-05	0.000360678	0.0019137	8.7572e-05	0.00111558	0.000235265	0.000332577	0.000697568	7.68313e-06	1.70517e-06	0.000302866	0.000578424	1.74587e-05	0.00158448	0.000357359	0.00140309	0.000117988	0.00018562	1.96724e-06	0.00107061	8.49102e-05	0.000787687	0.00268852	0.000716723	0.00074297	8.4713e-06	5.71043e-06	0.000577763	0.00146932	0.00123647	1.42427e-05	0.000922784	0.00023064	6.76841e-06	0.00238314	0.00136512	0.00175281	0	0.000810958
			1.5991e-06	5.04923e-06	8.421e-05	0.00046164	1.15639e-05	0.000837459	0.000373454	2.87974e-05	0.000251107	1.13326e-05	0.000279731	1.69626e-05	8.91256e-05	1.68263e-05	9.14956e-06	0.000310435	0.00116294	2.01124e-05	0.000773202	0.00206348	0.000865794	0.000271751	6.24567e-05	1.76101e-05	0.000153309	0.000322855	0.00186502	0.00327235	1.28353e-05	0.00133708	6.48804e-05	0.000794042	0.00024001	0.000469544	0.00157815	3.04257e-05	0.000369132	0.000588659	9.065e-05	0.00047179	8.81741e-05	5.78936e-05	0.00266291	0.000653599	3.98595e-07	0.00179369	0
			5.85306e-06	0.000287282	3.95465e-05	0.000339442	8.66343e-06	0.000465138	0.000176529	0.000311352	0.00277942	2.19791e-07	6.92312e-07	0.000524552	0.00171823	0.000569082	0.00147383	0.000185877	0.000488766	9.22911e-05	0.000177138	0.00212646	0.000267734	0.00158398	0.000156996	0.00060157	0.000256761	0.00301653	0.0021075	0.00374858	0.00234242	0.00192065	0.000908249	0.00118449	0.000281424	5.07632e-05	0.00343679	0.00271171	1.63051e-07	0.000463827	0.0023658	0.000328811	0.00244747	0.0039418	7.45301e-05	7.95612e-05	0.000718676	1.46603e-06	9.25192e-05
			4.28058e-05	4.77162e-05	0.000290482	0.000226193	0.000355138	0.000106708	0.000227403	0.000736085	0.000431257	5.64782e-05	0.000184176	0.000373143	0.00112679	0.000915631	0.000681799	0.000308205	0.0015854	0.000102662	4.00771e-07	2.15154e-05	0.000122507	0.000283185	0.000694745	0.00060964	0.000550355	0.000580344	2.73637e-05	8.17184e-09	0.00047162	2.52667e-05	0.00143392	0.00027972	0.00206382	0.000865872	0.0023348	0.00321095	0.000225279	0.000682595	0.000708292	0.000537806	0.00283874	0.00122381	0.00127713	0.000130389	0.000328972	0.000994758	0.000680249
			5.88691e-05	1.20791e-05	5.88437e-05	7.64668e-06	0.000186581	1.15412e-05	0.000166654	0.000273856	2.01852e-05	0.00017131	6.98058e-07	0.00081206	1.4066e-06	0.000169503	6.29019e-05	0.000169202	0.000616723	6.22014e-05	0.000133002	0.00043407	0.000754888	4.61329e-05	3.27528e-05	3.79845e-06	0.00126691	7.00235e-05	0.00102201	0.00013058	1.26218e-05	0.00010546	0.000395239	0.00064268	0.000475487	0.000306463	0.000676471	0.000771529	9.69222e-05	8.81726e-08	0.000143073	2.34478e-05	0.000889655	4.08281e-07	0.00072603	2.42283e-07	0.000222018	0.000406681	0.000396158
			2.04648e-05	0.000414589	0.000600983	0.00038843	5.02371e-07	0.000181805	0.000362829	7.1097e-05	0.000125424	0.000164615	1.75785e-05	0.0003384	0.000884256	8.5719e-05	0.000605838	0.000337999	0.000290633	1.90877e-05	7.7151e-05	0.000758279	9.01701e-05	0.000448276	8.98381e-05	0.000809708	0.000224208	0.000986231	0.00018461	0.000932334	0.00180169	0.00157128	1.78234e-05	0.00523088	0.00146139	0.00402323	2.26949e-06	1.3498e-05	0.000960801	0.000414654	0.00105071	3.28962e-05	0.000262581	4.07609e-07	2.12204e-05	3.42004e-06	0.000834257	2.20361e-05	0.00219414
			6.89857e-08	1.20137e-06	6.75589e-05	0.000287885	0.000217613	5.22141e-05	4.13244e-06	5.46768e-05	0.00106832	7.81398e-06	8.31941e-05	0.000480826	0.000630615	0.000259712	0.000141159	0.000918474	8.97679e-05	0.000140609	1.79132e-05	0.000206649	0.00324803	4.49039e-05	0.000402167	7.16879e-05	1.61937e-06	0.000174307	0.00113967	0.00145745	0.000347458	0.000576176	0.000902758	0.00589468	0.000739466	0.00050195	3.24026e-05	0.000763045	0.000424559	0.000150603	0.000235348	0.00420558	0.000217289	0.00025163	1.76806e-05	0.000316222	0.000474671	7.34082e-05	0.000488729
			0.000394244	6.37958e-05	0.000297204	0.000608797	9.20609e-05	0.000328577	5.15642e-06	0.00048611	4.30127e-06	0.000178057	2.58019e-05	0.000330047	0.000205401	0.00128172	0.00065718	0.000251885	0.00372447	0.0016676	6.70964e-05	0.000197649	4.33076e-05	0.00133647	0.00138055	0.00137577	5.47097e-05	0.00503686	0.00103337	2.74661e-05	1.17017e-05	0.000187584	0.00377292	0.000317722	0.00311027	0.0013452	0.0037356	0.000784549	0.000483568	0.000342735	0.000728487	0.00513567	0.000909602	0.00168479	0.01067	5.68183e-05	0.00147964	0.00249911	0.000381827
			0.000216052	0.000539382	0.000132401	0.000447958	6.22764e-05	0.00068443	0.000573764	0.000571256	7.5681e-05	8.28134e-05	0.000842692	4.17685e-06	0.00109201	0.00230805	0.000227842	0.00124581	0.00090217	0.00120419	0.000549325	0.000727374	0.000189979	2.86554e-07	0.000807823	0.00259567	0.00109842	0.00274319	0.000769075	1.83083e-05	0.000168164	0.00104286	0.00513728	0.000477642	0.00251931	0.00189273	0.00105825	0.00208929	5.58635e-06	0.000263779	0.000704467	0.00614663	0.00126684	0.001369	0.00574173	0.000722029	0.0033745	0.00136903	0.00080748
			0.000270721	4.46451e-05	8.28445e-05	2.12265e-05	0.000124456	7.91596e-05	0.00078119	0.000592163	0.00128843	0.000107213	5.91828e-05	8.67117e-05	1.67494e-06	3.96255e-06	2.31048e-05	0.00021495	1.77248e-06	0.000446914	0.000406441	0.000422848	0.000826246	0.000126926	0.000100561	0.000248184	0.00147731	0.00120644	0.000405788	9.76337e-06	0.00106383	0.00596552	2.33152e-06	0.000181999	0.000392181	4.07216e-05	0.00060712	0.000890591	0.000107114	0.000238128	0.00203552	0.0033201	0.000152216	0.000337401	0.00191917	0.000954906	0.000255601	0.00044069	2.30492e-05
			0.00152932	4.07326e-06	0.000725852	0.00175558	9.58709e-07	6.11668e-05	0.000238173	0.000197378	4.84069e-06	2.28164e-05	0.000896532	0.000144092	0.000286946	0.000590358	0.00259261	0.000181211	8.66128e-05	0.000282464	0.00262534	0.000900542	3.39784e-07	0.0024615	0.000621314	0.000715542	0.00137843	0.0021191	0.0005126	0.00368646	0.00149415	0.000329907	8.16146e-05	9.51682e-05	2.00346e-05	0.000933464	0.000370803	0.000104707	0.00102777	0.00261011	2.65295e-05	0.000167087	9.55137e-05	0.000355862	0.00135157	0.000929265	0.00216274	0.00261425	6.45694e-05
			0.000181493	9.56742e-05	2.98477e-07	0.000447369	3.84385e-06	1.17678e-06	0.00030468	0.000127241	3.90523e-05	9.98168e-05	0.00106711	0.000266596	0.0010731	0.000272661	0.00196691	0.000414285	0.000453008	0.000358239	0.000354344	0.000182993	0.00052476	0.000310464	0.000368853	0.0012548	0.000342002	0.00139088	0.000607346	0.000245074	0.000133795	0.000592308	0.000147685	3.10005e-05	1.2442e-05	0.00101354	0.000105284	0.000171735	5.19023e-05	0.00312322	0.000250152	0.000836559	1.89372e-05	0.000257147	0.000198019	0.00332926	0.00543749	0.00201635	0.000716581
			0.00035069	4.59404e-05	8.83518e-05	0.00106489	2.56872e-06	0.00330425	0.000451511	0.00116567	0.00104885	1.10628e-05	0.000117158	1.62635e-06	0.000475836	0.000359456	1.37395e-05	5.66573e-05	0.00249932	0.00078441	9.28048e-06	0.000135733	5.88287e-05	0.000168587	0.00138164	0.00200394	0.00010398	0.000701209	0.00126142	0.000148907	0.00123852	0.00125424	0.00262969	0.000178367	0.000791166	0.000918906	0.0021066	3.93802e-05	0.00134885	0.00200213	2.3311e-05	0.0088369	0.00032129	0.00243485	0.0075298	0.000156699	0.00153122	0.000386064	0.00254861
			4.72879e-05	0.000257272	1.7892e-05	2.22036e-05	0.00161904	0.000163224	0.000419311	0.000916997	9.21864e-05	0.000102123	1.36969e-05	0.000871313	0.000247507	0.00194011	0.00144088	6.04381e-05	0.00296505	0.00067992	0.000456202	0.0010206	0.000104229	0.00199004	0.00137571	0.00240788	0.000227884	7.33544e-05	0.000173983	0.000317402	2.10602e-08	0.000513086	0.000191779	0.00028055	8.92608e-09	0.000147434	0.00289985	0.00267465	0.000146443	2.73561e-07	0.00272011	1.25811e-05	0.00276041	0.000727151	5.78471e-05	7.94028e-06	0.000432448	0.000325198	1.17484e-05
			9.40535e-05	0.00045853	0.000129187	3.09219e-05	2.55078e-06	9.40588e-05	5.66607e-05	7.66076e-07	0.000383753	0.000274545	0.000905646	6.19143e-05	0.000801974	0.000760867	0.000544428	1.51624e-05	0.000465873	0.00171941	0.00048011	0.000415656	0.000663831	3.68253e-05	0.00250704	0.00531706	5.22301e-05	0.0017858	0.00276008	0.000184081	7.70716e-05	0.000213086	0.00373722	0.00129121	3.12476e-05	6.15613e-06	0.000248195	0.000330937	5.54842e-05	0.000448434	1.13473e-05	0.00275758	2.56305e-05	0.00665185	0.00132689	0.0042373	0.00526136	0.00225192	0.00124809
			0.000130822	0.000343498	0.000241437	0.000789379	5.84156e-05	5.2882e-05	0.000548047	5.31234e-05	0.000596096	0.000115848	0.000327475	0.000526343	0.00169343	0.000895443	0.00166917	0.000989437	0.00109768	0.000507197	3.41022e-05	0.000151115	7.32629e-05	2.5143e-05	6.75673e-05	0.000456643	0.000677698	7.28483e-05	0.000254393	7.83325e-05	0.00190431	0.00162245	0.000422553	0.00229565	0.00214894	0.00146546	0.000463588	0.00306991	0.000480187	3.63049e-07	0.00140127	0.000365488	0.00141242	0.00222057	7.69891e-05	9.87572e-05	0.00053318	0.000363502	1.11474e-05
			0.000569791	1.94527e-06	0.000202533	0.000266836	0.0001825	0.00015979	0.0005175	1.02261e-05	0.00018756	0.0023453	0.000218281	6.00958e-05	1.11537e-06	2.17297e-05	0.000475832	1.06933e-05	0.00147874	3.8486e-05	0.000647772	0.000351709	0.000955839	3.47644e-05	0.000129007	0.000611674	0.00124743	6.4298e-05	0.000313659	0.000993048	0.00084079	0.000201229	5.02149e-05	2.53573e-05	0.00171893	0.0017857	4.67985e-05	0.000188849	0.000533493	0.00205408	0.000328614	0.000987371	0.00129457	3.05977e-06	0.000390059	0.000763827	0.000780208	0.000506779	0.00100344
			0.000601697	4.14354e-05	0.000232111	0.000160286	5.33466e-05	0.000115665	0.000641944	6.89638e-05	7.96683e-05	0.000226324	1.17481e-05	4.45626e-07	0.0013431	0.000501368	5.78311e-06	0.000656874	0.000839421	0.000106871	0.000594764	0.000117218	0.00118843	0.000160169	0.000386829	0.000856988	0.000653314	0.000325955	1.4135e-07	1.89535e-05	0.000334034	0.00394316	0.00163233	0.00311532	0.00181143	0.00206253	0.000194451	0.00116342	0.000366424	0.000117622	0.00203739	0.00276022	0.000945049	0.00160174	0.00155365	0.000649839	0.00128501	7.64401e-05	9.34371e-07
			0.00040116	0.000371584	9.81217e-05	0.00055564	5.64782e-05	0.00024048	0.000382159	0.000111903	3.42628e-05	0.000458464	0.000255004	0.000632586	0.000661807	0.00180706	0.00094438	0.00231881	0.00241429	0.000902309	0.00115731	0.000471324	0.00091873	1.17637e-05	0.000601982	0.000969995	0.000943875	0.00128937	0.000630291	0.000204114	0.000283126	7.40167e-05	0.00271926	0.0028844	0.00311057	0.000824355	0.00106782	0.00138225	0.000957994	0.0002461	0.00161379	0.0013417	0.000812374	0.00231829	0.00160458	0.000116925	0.00177162	0.00129338	0.000298201
			0.000110929	7.12353e-05	4.60574e-06	4.54096e-05	4.48056e-05	0.000428949	0.000117933	0.000192444	0.000713026	5.57056e-05	0.000634614	0.000156236	9.15663e-05	0.00112928	0.000192766	0.000904614	0.000248492	0.00107571	0.000950639	0.0017724	0.00155283	0.00076663	0.0010903	0.000945092	0.000263353	0.00152486	0.00291883	0.000119783	9.22524e-05	0.00945705	4.86236e-06	0.000394565	0.000126503	0.000623388	0.00194098	0.000214705	1.47017e-05	0.000322152	0.000442493	0.00053408	7.87169e-06	0.00430439	0.000450747	0.000434819	0.00021411	0.000152247	0.00175462
			7.8517e-06	0.000252221	0.000611516	0.000201561	0.000443157	0.000136915	0.000197783	0.000182454	0.00091414	0.000243637	8.4119e-05	0.000546185	0.000357825	2.18182e-05	1.38534e-07	5.07727e-05	0.000721912	1.55527e-05	0.000543924	0.000273751	0.000359921	7.03983e-06	0.000114161	4.05517e-06	0.00130612	0.000399667	0.000374119	0.000443251	0.00206908	0.000340794	9.9405e-05	0.00103658	0.00039816	5.17375e-05	0.000987948	0.00186488	8.71194e-07	0.00030039	0.000838223	1.37569e-05	0.00196545	0.00119765	0.00383263	0.000860264	3.12081e-06	0.000330787	3.90212e-06
			0.000571361	0.000211026	0.00031337	0.0020259	0.000214364	0.000206927	0.000654719	0.000135378	0.000111261	0.000376871	0.00191381	0.000178906	0.00144034	0.00186997	0.0023955	0.00318222	0.00415726	0.000737672	0.000118883	0.00131329	0.000683885	0.000399776	0.000593247	0.00274881	0.000788928	0.00393271	0.000642798	0.000147561	0.00177774	0.00012014	0.00280652	0.00248144	0.00578284	0.00222032	0.000884083	0.00543394	0.00123294	0.000488623	0.00307767	0.00208943	0.00234398	0.00265084	0.00323194	0.000821682	0.00405133	0.0010062	0.00206889
			0.000148684	2.69841e-07	0.000139012	0.000711883	0.000980462	0.000726871	0.000463086	1.42757e-05	6.05011e-06	4.65158e-05	0.0012396	1.71131e-05	4.98176e-06	0.000109631	0.000653227	0.00208652	0.00041437	0.000418333	5.60506e-06	2.64646e-05	3.46434e-05	0.0026235	6.53258e-06	0.000722779	0.000676962	0.00225645	0.000286425	0.00590296	0.000102867	0.000827427	7.61213e-06	0.000153984	6.06701e-05	0.000537824	6.18408e-07	2.1418e-05	0.00276255	0.00347713	1.0565e-05	5.2096e-05	0.000414978	0.000510894	0.00159512	0.00130866	0.000715783	0.00297703	0.000559644
			0.000473973	0.000108437	5.50423e-05	0.000605086	8.73546e-05	0.00017621	0.000114416	0.0011709	0.000410622	0.000388839	0.000382959	0.000129682	0.00236254	0.000102832	0.00139715	3.55033e-05	0.00023496	0.000196473	0.00177028	0.000570762	0.000878277	0.000671721	0.00265033	0.00361048	1.66344e-05	0.00637191	0.0013283	0.00196131	5.48513e-06	0.00108958	0.000670715	0.000378507	4.39596e-07	0.000999278	0.001247	0.00168684	0.000125261	0.000451265	9.32878e-06	0.00046604	0.000108193	0.00325387	0.00429358	0.0024	0.00761027	0.00403554	0.000335374
			9.40066e-06	0.000849594	3.2116e-06	0.000316591	0.000125526	0.000357543	0.00017252	8.7408e-05	0.000264589	0.000391867	2.44948e-05	0.000333163	0.00072251	0.000798777	0.0011781	0.000203861	0.00216536	7.6661e-05	0.00111004	0.000244828	0.000318926	9.39296e-05	6.34872e-12	0.000233911	0.00127	0.000280612	7.18348e-06	8.80515e-05	0.00174747	0.000185306	0.000229529	0.0013386	0.00211568	0.000635032	0.000224075	0.00500268	0.00140452	0.000146626	0.000708995	0.000147401	0.00173428	0.00018646	0.000106498	0.000356007	1.13965e-06	8.53295e-06	9.35878e-05
			6.62637e-05	3.18712e-05	0.000112399	9.95743e-06	0.000640946	0.000252604	0.000199626	1.88963e-05	2.03883e-05	0.000439856	4.27968e-05	0.000640383	0.000200666	0.00121322	8.98753e-06	2.88182e-05	0.00390994	0.00038241	0.000338734	0.000139892	0.000206872	0.000241608	0.000455594	0.000216622	0.000636973	0.000332284	1.48247e-05	0.000131189	0.000971623	7.45337e-06	0.000432989	0.00158728	0.000764903	0.000698112	0.00223014	0.00116764	5.69371e-05	0.00059355	0.00193129	0.000243346	0.00121908	0.0019759	8.41147e-06	0.00063673	5.0632e-05	0.000169482	0.000164335
			2.02221e-05	1.63973e-05	0.000127155	0.000580736	4.24428e-05	1.74844e-05	7.66782e-05	0.000480237	0.000665842	0.000423547	0.00186868	1.04004e-07	0.000668591	0.00103728	8.26288e-05	0.00182002	0.000238302	0.00107701	0.00191533	0.00440368	0.00258789	8.14998e-07	0.00187861	0.00166126	0.000385498	2.48686e-05	0.00490141	0.0016476	0.00059391	0.00192112	9.69073e-06	0.000153126	0.00214612	0.000480934	0.000159955	2.29706e-07	0.00038857	0.000410371	5.11846e-05	0.000488537	0.000145158	0.00941331	0.00120642	0.00386084	0.000731101	0.000572889	0.0110929
			3.09596e-05	0.000168071	0.000111511	4.42429e-07	7.71063e-05	0.000232735	0.000394081	0.000319848	3.53549e-06	0.000473405	1.27408e-05	0.000475125	0.00088211	0.00187968	0.000151499	0.000950231	0.00208548	0.00216017	0.000447636	1.28836e-06	0.000304383	0.000272554	0.000489831	0.00140153	0.00188137	0.00450793	0.000144489	4.75632e-05	6.79932e-07	9.30182e-05	0.00373732	0.00140865	0.00418089	0.00134579	0.0023523	0.000863909	2.69912e-05	4.91718e-05	0.0013814	0.00579203	0.00167125	0.00304508	0.00530422	0.000377993	0.000896053	0.000224075	1.96967e-05
			8.54592e-06	0.000218785	5.8215e-06	1.19054e-06	0.000465565	1.47712e-06	0.000435714	0.000691357	0.00234732	6.24808e-05	0.000943803	0.000676307	0.000411333	0.000771872	0.00163942	2.03832e-07	0.00179564	7.02012e-05	0.000924075	1.81132e-05	0.000239804	0.000123746	0.000280851	0.000114272	0.00110645	0.000692807	0.00122663	0.000102467	0.00187964	1.82911e-05	0.000540684	0.000811331	7.08542e-05	0.000178293	0.00554365	0.00470346	0.00211302	0.000184866	0.00307215	1.22807e-05	0.00240494	0.00134339	5.90876e-05	0.000745749	2.80994e-06	0.00174395	1.47311e-07
			0.000218834	0.000460273	0.000194218	0.00174257	0.000140416	2.65553e-05	0.00163243	0.000560967	0.000378979	3.36351e-05	0.00131322	6.64363e-05	0.000992279	0.00398334	0.00115405	0.000789846	0.00197303	0.00128755	0.000219814	8.88924e-05	0.00163828	0.000314808	0.0010897	0.00512163	0.00171805	0.00142332	0.000266535	0.000800308	0.000318702	0.00252185	0.00440677	0.00143495	0.00364659	0.00123569	0.0010752	0.00293673	0.00194634	0.000275292	0.00453116	0.00131649	0.00144568	0.00339722	0.00434389	0.000608036	0.00380936	0.000723451	0.000500108
			6.60531e-06	0.000105339	0.000234796	0.000479429	0.000132671	9.03498e-07	0.0002775	1.07248e-05	6.44459e-05	0.000298452	0.000113579	0.000141615	0.00012465	0.00042786	7.53458e-05	0.000767741	0.000790565	0.000310154	0.00131486	0.00228565	0.000350603	0.000191832	0.000212211	0.000805763	0.00164198	7.52496e-05	0.00136074	0.000115153	0.0013095	1.14736e-06	0.000214901	7.02419e-05	0.00202348	0.00311687	0.00045766	0.00154156	0.000342842	0.000642639	0.000575683	0.00153055	0.00161276	0.000135292	0.000424501	0.00151506	0.000211954	0.000882332	0.00400379
			0.000770768	0.000491934	0.000267587	0.0016692	0.000445386	0.000924367	0.00141559	0.000404904	0.000594091	0.000433494	0.00173248	0.000255128	0.00087063	0.00345588	0.00350907	0.00300308	0.00356267	0.00269668	0.000361147	0.000472392	0.000995166	0.00120721	0.00133684	0.00379027	0.000379064	0.00600041	0.000893831	0.000988461	0.000494064	0.00378774	0.00645501	0.00317932	0.00735553	0.0023344	0.00222668	0.0053834	0.00339077	0.000472783	0.00331832	0.00579859	0.00132219	0.00314015	0.00782383	0.00179815	0.00786443	0.00402161	0.000553479
			0.000179327	0.000146164	0.000341514	4.27012e-05	2.61907e-06	4.02324e-05	0.000570937	6.35029e-05	4.58057e-06	0.000287951	0.000186376	6.57312e-05	5.92881e-05	0.000119468	0.000493664	0.0015302	8.05048e-05	0.000400037	0.000766165	0.000819081	0.000470717	0.000123128	2.345e-07	0.000418018	0.000980649	0.000723608	0.00260649	0.000540831	0.00094642	0.0102637	0.00142148	0.000982056	0.00334387	0.00231193	0.00110455	0.000217867	0.000372001	0.000596427	0.000215794	0.00258669	0.000659451	0.00105609	2.9323e-05	0.000159942	3.57102e-05	5.27785e-05	1.24301e-05
			2.72666e-05	0.00014598	3.84395e-08	6.2911e-05	0.000669182	0.000387086	0.000170232	0.000330962	5.04189e-05	0.000151517	0.000280309	0.000287086	0.000278546	0.00222295	0.000163465	1.98e-05	0.00223043	0.000383869	0.0001407	2.08555e-05	0.00019225	0.000915032	0.00128534	3.907e-05	0.00136467	0.0010477	0.000743592	0.000172552	0.00093937	1.66566e-06	0.0025937	0.00063983	0.000322629	0.00131225	0.00419596	0.000980621	0.00122935	0.000447019	0.00170623	0.00163546	0.00223229	0.00165988	0.00097494	0.00182438	0.000148481	0.000351292	0.000508449
			0.000142094	0.0002952	0.00119965	0.000326215	0.000853012	0.000142011	0.000366688	0.00012109	7.73326e-05	0.00109996	4.72512e-05	0.00159902	0.00055119	0.00220424	4.62604e-05	0.00115374	0.00176276	0.00016398	0.00244705	0.000275212	0.00266887	0.00034696	8.98871e-05	0.000171105	0.001689	0.000548631	0.00024537	0.000380664	0.000278795	0.000339548	0.000907721	0.00191413	0.00250309	0.00231219	0.00169695	0.00188058	0.00033412	0.000185293	0.00260866	7.76817e-05	0.00174089	0.00156498	2.89562e-05	0.000354127	0.000518377	0.000514729	0.00110562
			3.79151e-08	5.16767e-06	0.000129177	8.65114e-08	0.000199793	0.000398852	0.000141337	5.72904e-06	9.6312e-06	0.000743781	0.00347977	0.00134811	9.9882e-06	0.00102318	0.000494224	0.000728578	0.000370309	0.00181504	0.000988191	0.00221389	0.00119442	1.01775e-06	0.00161872	0.00657818	0.00103408	0.00184399	0.00196014	0.00151118	0.000757054	8.12707e-05	0.00219641	3.39169e-05	0.000107908	0.000912748	0.00176801	1.10267e-05	0.00525007	0.00568943	0.000616374	0.000531306	0.00194633	0.000314233	0.00126391	0.00665191	0.00822376	0.00524676	0.00124058
			0.000375311	0.00123711	0.000317607	0.00010767	0.000422574	0.000349468	0.000292641	0.000262461	0.000416959	0.000564302	2.72457e-05	0.00123659	0.00230637	0.000832162	3.23732e-06	0.000104533	0.00570189	0.000345466	0.000485569	0.00157193	0.000152492	0.000700485	0.000409655	4.48397e-05	0.00214387	0.000164856	0.000310578	0.00012369	0.00807644	0.000663819	0.00153447	0.0055693	0.0019164	0.00252555	0.000358928	0.00439949	0.000207026	0.000176325	0.000470277	0.00201523	0.00386923	0.00441485	4.32486e-06	0.000176688	0.000818857	2.30614e-06	0.00011146
			0.000417196	0.000197117	7.19523e-06	0.000313194	0.00104523	0.000173356	0.00108931	8.57721e-05	4.28112e-05	0.000998133	0.000691729	0.00120638	4.18613e-06	0.000211761	0.000671638	0.000651383	0.000503101	0.000170884	0.00127708	0.00171885	0.000251005	0.0156193	7.28717e-05	0.00126651	0.0017956	0.00164695	0.000171947	0.00085475	0.00283012	9.19836e-05	0.000669293	0.00201997	0.000332826	0.00124683	0.000622329	0.00172329	8.94747e-05	0.00479131	0.000559625	0.00121168	0.000995607	0.000260825	0.00136905	0.00276797	0.00639774	0.00424215	1.61147e-06
			1.40056e-11	0.000780575	8.309e-06	0.000187477	0.000522757	2.92605e-05	0.000846461	0.000623887	0.000512756	0.000428706	0.000330578	0.000700134	0.000317973	0.000638952	0.000108962	0.000614386	0.00164861	0.00033857	0.000565082	0.000140901	0.000529095	5.33138e-05	0.000265221	5.23784e-05	0.00236003	0.00177753	0.000181355	7.31301e-05	0.00124558	0.00142978	0.00148122	0.00102781	0.00221861	0.000847674	0.00385922	0.00338285	0.000266957	0.000148981	0.00370982	0.00166353	0.00348869	0.00189984	0.00229206	0.000190407	1.60114e-05	0.000281329	0.000489067
			0.000733669	0.000361053	2.16454e-05	4.82356e-06	0.00123067	0.00175997	0.00026085	0.00137083	0.00254518	0.00109348	0.00403614	0.00238351	0.000110608	0.000159896	0.000329414	0.00117557	0.000213534	0.00385386	0.000853914	2.45412e-05	0.000507747	0.00388315	0.000281189	0.00340407	0.00201991	0.00288897	0.000370451	0.00176185	0.0152799	0.000618104	0.000988138	2.84385e-05	2.45953e-05	5.26104e-05	0.00162067	0.00128752	0.00171098	0.00280592	0.001122	0.00106378	0.00254058	0.000151584	0.0082989	0.000652807	0.00478521	0.00849429	3.62803e-05
			0.00065712	0.00110198	1.70504e-05	9.42796e-05	0.000600366	0.00326147	0.000501162	0.000679461	0.00185338	0.000929916	0.000443464	0.000613607	0.000106895	6.49311e-05	0.000107953	3.2479e-07	0.00232727	7.61784e-05	0.00027146	0.000170943	1.8186e-09	0.00167174	4.45691e-05	0.000344758	0.00279537	5.15639e-06	0.000435433	0.000417006	0.0174813	0.000366885	0.000339507	0.00105467	0.000768466	0.00085891	0.000988818	0.00623491	0.000723847	0.000463093	0.00082833	0.000367933	0.00404444	0.000757517	0.000634873	0.000970504	0.000230198	0.00304807	0.00140403
			8.96489e-05	0.000232654	0.000891949	0.00072632	0.00030822	6.22429e-05	0.000989162	0.00014905	1.83339e-06	0.000784709	0.000487196	0.000994555	0.000257846	0.000673017	8.31879e-05	0.00165654	0.00148364	4.12364e-06	0.00062976	7.37543e-05	0.00277064	0.000178403	7.33387e-06	0.000146684	0.00223429	1.30756e-06	0.000610367	3.46453e-05	0.000226765	0.000962029	0.00229454	0.000494968	0.0048063	0.00477971	0.00100412	0.00166699	0.000287633	0.000524391	0.00600995	0.00163459	0.00402004	0.000499713	0.00117342	0.000231165	0.000106768	0.00090912	0.0025349
			7.20502e-05	4.0826e-05	0.000408287	2.74229e-05	0.000422216	0.000629415	0.000849515	9.49383e-05	1.65884e-05	0.000887483	0.000882559	9.68798e-05	0.00020597	2.91747e-05	0.000988933	0.00250932	5.70734e-05	0.000200345	0.00172727	0.000313552	0.00176227	7.7601e-05	0.00241891	0.000676875	0.00109655	0.00200071	0.00112315	3.52613e-05	0.000872408	0.00452969	0.000192946	0.00227716	0.00394494	0.00310089	2.16192e-05	0.000827772	0.000558496	0.00173069	0.00545907	8.46351e-05	0.000485357	0.000673192	0.00540117	0.000628669	0.00324025	0.00509421	1.94946e-05
			3.26159e-05	0.00010412	0.000310595	6.17559e-07	0.000185024	0.00122616	0.000199494	9.9009e-05	8.45931e-05	0.000728801	0.000980074	0.00105343	1.31666e-05	9.49183e-05	0.00193258	0.00169322	3.4052e-05	0.000612171	0.00224122	0.000547253	0.000856966	0.000824455	0.00143965	0.0018861	0.00309805	0.000411878	0.00168822	0.000104888	0.00320949	0.0026277	0.00020288	0.00141035	0.00431429	0.0034551	1.19285e-05	0.00272886	6.013e-05	0.00241095	0.00160978	0.000362127	0.00305787	0.000682972	1.18495e-08	0.002137	0.00425836	0.00304097	0.000114918
			0.000125125	9.18592e-05	0.00017037	0.000135976	6.96458e-06	0.000134235	3.44155e-05	0.000187759	9.74954e-06	6.34586e-06	4.5352e-05	1.52133e-06	0.000309096	1.39025e-07	0.000114101	1.81705e-05	1.82727e-05	0.000205068	0.000121976	1.05684e-05	2.40459e-05	0.00010595	7.51517e-06	0.000113647	7.38101e-06	4.87755e-05	2.35318e-05	2.41629e-08	2.40256e-05	0.000320862	3.38206e-05	0.00011542	0.000235171	3.35565e-05	1.97279e-06	3.31632e-05	6.35126e-05	0.000101058	7.74543e-05	4.89517e-05	3.75488e-05	1.47399e-05	0.00012487	7.09274e-05	0.000285457	0.000101256	0.000464393
			0.000148569	0.000337643	0.000133074	7.69215e-08	8.45591e-05	7.13629e-05	9.46119e-07	3.38289e-06	4.40434e-05	6.90411e-05	0.00036957	0.000248897	3.66281e-05	9.11664e-06	0.000379538	2.43716e-05	1.49897e-05	4.0967e-06	2.28165e-06	4.98813e-06	6.43185e-06	6.1221e-05	0.000136106	0.000150133	3.25869e-06	5.98883e-05	1.92467e-05	4.5511e-05	0.000267105	0.000212898	5.05097e-06	0.000859732	0.000390086	0.000182469	1.65829e-05	2.20505e-05	0.000330484	0.000154784	7.38074e-05	2.2688e-05	2.95125e-08	4.57333e-05	2.13695e-05	0.000272799	0.00036606	0.000290075	3.77538e-06
			2.86726e-05	6.56267e-05	4.40286e-05	6.09561e-05	1.56162e-07	8.7885e-05	1.39737e-05	2.7686e-05	4.46763e-05	3.30244e-05	0.0002118	0.00011061	4.906e-05	2.85056e-05	2.84526e-07	0.000638842	0.000259507	4.04781e-05	0.000144385	9.14163e-10	5.21929e-05	5.0565e-05	0.000317488	0.000160776	0.000105002	0.000346533	3.43505e-05	2.91841e-06	0.000128463	9.6405e-05	0.000762217	1.94281e-05	0.00037522	6.30554e-06	4.08649e-05	0.000244475	8.30068e-05	0.000355663	0.00025281	0.000361064	0.000263009	0.000153974	0.000536976	8.15131e-05	0.000186377	0.000349728	1.63151e-07
			0.000103898	8.41329e-07	2.51372e-05	1.88769e-05	1.16402e-05	0.000464503	4.29711e-05	4.57575e-07	6.84299e-06	8.01135e-05	4.20326e-05	6.60291e-06	6.42364e-06	6.01927e-06	0.000462444	0.000267202	0.000177533	1.1467e-05	0.00019285	0.000280245	0.000551766	0.000251451	5.94305e-05	4.15295e-06	1.35841e-05	0.000216522	0.000190027	2.49084e-06	0.000199031	1.94678e-05	0.000386591	6.75654e-05	0.000652565	0.000156558	0.000553881	0.000185363	0.000436066	1.43754e-05	0.000306919	7.47119e-05	4.15853e-07	3.07981e-06	8.09824e-05	5.33919e-05	0.000212385	0.000552804	0.000167825
			2.59039e-05	2.98912e-06	1.38423e-05	0.000153132	0.000105284	6.38488e-05	5.38165e-05	0.000149618	0.00020444	0.000197034	1.81856e-05	0.000227688	3.75791e-05	0.000302672	0.000225638	1.13605e-06	3.10741e-09	8.55418e-05	0.000159084	3.20647e-06	0.000388617	7.38934e-05	2.72459e-05	0.000158094	8.8507e-06	0.000737639	2.18528e-07	0.000142555	0.00242261	0.000911886	0.0002996	0.000193859	1.36255e-07	9.20223e-06	5.81495e-05	0.000157496	7.44015e-06	0.000178316	0.000146592	0.000244319	0.000123967	0.000150857	0.000307521	1.25624e-05	0.000751753	3.68294e-07	0.000235885
			2.57407e-05	6.29403e-05	0.000106965	0.000104409	2.56319e-06	1.264e-05	0.000170191	5.12889e-07	6.37085e-05	0.000146129	0.000213303	0.000128603	4.93179e-05	0.000605652	0.000157998	0.000319919	0.000554574	0.000352566	0.000222638	1.39937e-05	0.0010805	0.000380346	7.6324e-05	0.000317048	9.81145e-05	7.53189e-05	0.000314202	5.73899e-06	0.000100285	0.000401205	0.000127041	0.000422075	5.17124e-05	0.000530959	1.89218e-06	0.00028948	0.000365501	3.21688e-05	0.000503528	0.000461363	0.000230246	3.5587e-07	2.7531e-05	5.31421e-06	0.000565431	0.000190737	8.04467e-07
			6.47596e-05	1.42554e-06	3.37531e-07	0.000279538	7.62676e-05	2.88986e-06	2.69261e-05	0.000134093	6.97463e-07	6.37461e-06	0.00010381	5.97901e-06	4.03604e-05	8.90637e-05	0.000319031	2.12495e-05	0.0010381	5.31986e-05	2.31084e-06	8.94168e-06	1.25526e-05	9.31427e-06	0.000171426	4.58247e-07	4.51934e-05	0.000364058	6.70575e-05	1.71325e-08	0.000325239	0.000637949	5.737e-08	6.10051e-05	0.000142322	2.31337e-05	0.000673761	0.000178919	2.69324e-05	3.87512e-05	6.44182e-05	9.76812e-05	0.000112863	0.000136051	1.55558e-05	0.000289381	0.000470044	0.000198965	0.00226314
			0.000303923	0.000143421	4.68595e-05	5.75513e-05	2.85248e-05	0.000244732	3.28087e-05	2.84816e-05	0.000247549	1.56253e-05	2.62118e-05	0.000106661	0.000103644	0.000346312	5.00886e-05	3.97717e-05	0.000146307	2.36731e-05	4.48665e-06	0.000140837	3.80665e-05	0.000135652	6.70454e-05	0.000294669	0.000784434	0.000317925	1.51306e-07	0.00027581	0.000558135	3.40638e-06	0.000406134	0.000195392	0.000209635	2.30408e-05	0.000350447	0.000188999	0.000142393	1.71148e-05	0.000622871	0.000300036	0.000566238	0.000489861	0.000739996	0.00010993	4.55772e-05	0.000266485	2.16554e-05
			5.00762e-06	1.78521e-05	9.28186e-06	9.27485e-07	2.77573e-05	2.10859e-05	0.000275189	2.25288e-08	1.6192e-09	0.000410089	3.6619e-05	0.000381566	3.64508e-05	0.000138747	4.85688e-06	0.00012862	0.000534801	9.58143e-06	1.89283e-05	4.76076e-05	0.000119499	1.51238e-05	4.90988e-07	1.13096e-06	0.000182628	6.25487e-05	9.33426e-05	1.55535e-05	7.19555e-05	8.81476e-05	5.91275e-05	0.000927647	0.000832657	0.000258245	0.000177782	0.00116779	9.69007e-07	2.43044e-05	0.00029425	2.51683e-06	0.00011542	1.06521e-07	9.6008e-07	3.57784e-05	1.15434e-05	1.61507e-06	6.87021e-06
			0.000444511	0.000132936	0.000563406	0.000182818	5.12577e-05	5.15899e-07	2.0458e-05	6.85021e-06	0.000182991	4.32589e-05	1.23094e-05	6.98062e-05	4.43184e-08	9.43228e-05	8.83177e-05	8.11459e-05	0.000216583	2.28716e-06	0.000328895	7.37596e-05	0.000675387	0.000162589	0.00017288	0.000174984	1.56598e-06	6.56722e-05	0.000121026	5.82426e-06	5.42588e-05	2.58794e-05	0.000141383	6.70152e-05	0.000114917	0.000351972	0.000292178	0.000504032	0.000354654	1.58147e-07	0.000587727	0.000338761	0.000378714	6.64036e-05	0.000197846	3.40558e-05	0.000171853	0.00036616	0.000446443
			0.000118071	0.000154884	6.09763e-05	0.00028779	1.19095e-07	7.49662e-06	3.62133e-05	4.32521e-06	5.39048e-06	1.91556e-06	0.000199618	2.69861e-05	1.94524e-08	3.80317e-06	0.000202575	3.22902e-06	6.05862e-05	0.000624685	0.000101105	6.97831e-05	0.000275445	1.63421e-05	0.000322865	6.63083e-06	4.77345e-06	0.000618289	0.000190187	0.000428628	5.69013e-05	4.18663e-05	9.47038e-05	1.32865e-05	8.5961e-05	2.83916e-05	0.000250734	2.83133e-06	4.41441e-07	2.10448e-05	0.000133919	6.02166e-05	6.31914e-06	3.99763e-05	5.06744e-05	4.73005e-05	0.000157727	0.000158606	0.000452753
			6.20622e-07	0.000122103	1.67705e-05	7.9262e-05	4.32303e-05	1.94423e-05	1.21038e-05	0.000137082	1.183e-05	0.00012335	0.000166356	1.3266e-05	0.000265222	0.000352083	0.00102993	0.000110907	8.047e-05	3.65847e-07	8.73009e-05	0.000225313	0.00035562	0.000324813	1.11329e-05	5.02067e-05	1.13556e-07	5.1404e-06	0.000812384	3.27238e-06	0.000112613	0.000413473	4.52531e-05	4.12236e-05	8.13626e-05	1.7954e-05	1.23131e-05	0.00103622	0.000956103	0.000395332	0.000931164	0.000243603	2.01433e-05	0.000930727	1.75821e-05	3.49962e-08	0.000379342	0.000600016	0.000685878
			0.000232642	0.000407847	0.000102507	0.000703636	0.000179747	0.000568758	6.08458e-05	2.614e-05	0.000307386	0.000170144	1.00177e-06	2.8833e-07	6.74305e-05	0.000140597	0.000125201	8.8212e-05	2.41311e-06	0.000346535	0.000375945	0.000189435	0.000195027	4.43859e-06	0.000979824	0.000270573	0.000146973	0.000645192	0.000805943	0.000125324	5.44456e-05	2.92375e-05	0.000854251	0.000226896	4.25248e-05	8.41347e-05	0.000235767	0.000449312	7.09358e-05	6.02047e-05	0.000481725	0.00153424	0.000184068	0.000965152	0.00129773	0.000207833	0.000656107	0.00199333	9.41122e-05
			2.55881e-06	0.000193074	2.39907e-05	8.0422e-06	4.64897e-07	0.000681135	3.96369e-07	5.31757e-06	1.816e-05	0.000373383	0.00154092	6.38488e-05	5.72642e-06	4.45315e-05	0.000138868	4.80655e-06	8.61717e-06	0.000403308	6.56509e-05	0.000694514	0.000581985	2.01341e-05	4.35401e-07	4.28993e-08	1.9966e-06	0.000130254	0.0012418	0.000183773	1.80559e-05	0.000307894	3.53597e-05	1.69541e-05	0.000493597	4.42628e-05	0.000337574	0.000334894	0.000776575	0.000151179	0.000826283	4.46193e-05	2.89262e-05	1.96947e-05	6.85608e-05	9.02144e-05	0.000575663	3.81995e-05	0.00287041
			4.34648e-06	1.22695e-05	0.000215084	0.000207717	3.37517e-06	2.46956e-05	2.23154e-05	0.000325457	0.000213583	3.7459e-05	1.21084e-05	2.72116e-05	0.000334931	0.000143449	0.00287345	3.76657e-06	0.000203649	7.0556e-06	0.000946282	0.00011779	0.000120259	0.000122229	7.79656e-06	9.98913e-05	0.000188778	0.000314915	1.3626e-05	0.000277983	9.90524e-05	9.62901e-05	2.51815e-06	0.000927027	2.1506e-07	0.000528219	0.000662781	0.000578988	8.6977e-05	0.000491856	8.30888e-05	0.00148793	7.93339e-07	5.57048e-06	1.12865e-06	7.15205e-06	0.000197746	0.000705271	0.000737331
			0.000324934	6.23157e-06	1.49643e-07	0.000126118	4.64726e-05	9.43689e-05	4.79529e-06	4.9996e-07	8.82861e-09	7.94301e-05	0.00010245	7.96755e-06	0.000929589	0.000452108	0.00147309	6.21602e-05	2.36901e-05	0.000955279	4.89395e-05	0.000640019	4.3355e-05	9.0624e-05	0.000176473	1.5955e-05	9.77966e-05	9.61179e-05	9.12072e-07	0.000164964	0.000291174	0.000677197	0.000137733	0.000352959	9.32488e-05	0.000229471	0.000530415	0.000344558	5.79434e-05	0.000834693	8.22545e-06	3.91927e-05	3.65602e-06	4.74572e-08	0.000257106	0.00027254	0.00020273	8.66467e-07	0.00049529
			0.000683212	6.14142e-06	0.000243588	8.32238e-05	1.52904e-05	0.000297968	3.9226e-06	3.40326e-05	0.00015135	6.30368e-05	9.14212e-05	9.12527e-06	0.000409836	2.49266e-07	0.000454519	8.97051e-05	3.61678e-06	3.82415e-05	5.96509e-05	9.04255e-07	3.62888e-05	0.000111923	0.000115344	0.000348301	0.000400709	1.85876e-06	3.06076e-06	1.92765e-05	2.50268e-06	2.71092e-06	1.92166e-06	1.25601e-05	0.000138449	2.19724e-06	0.000269441	0.00103431	4.7391e-05	0.000177543	4.50375e-06	8.90384e-06	0.000124741	9.90301e-07	2.89451e-05	8.53947e-05	0.000134729	0.0005489	0.000433392
			2.41804e-05	2.06547e-05	0.000213851	0.000317883	3.07964e-05	4.34232e-05	0.00013599	7.60384e-05	5.87897e-07	2.21141e-05	0.0006737	3.48201e-05	0.000418334	3.93011e-07	0.000649874	0.00112354	3.26166e-05	0.000717961	1.0383e-06	0.000809166	0.000182762	0.000174432	0.000133519	0.000127745	9.88874e-05	9.41766e-06	7.24792e-05	1.08934e-06	0.000567675	2.38661e-05	0.00025663	0.000423273	0.00142585	0.000120876	0.000492508	0.000264403	0.00327539	0.00112434	1.73875e-06	0.000241878	0.000313357	7.26695e-06	0.00016597	0.00381388	0.00129119	0.00122792	0.000341394
			0.000328219	7.39746e-05	0.000412474	2.5727e-06	2.29816e-05	0.000322641	5.57718e-05	9.57186e-07	2.57713e-05	0.00010551	0.000257773	3.76842e-07	3.64498e-05	0.00013901	5.82274e-05	0.000625087	5.14188e-06	0.000139365	0.000702635	8.82673e-05	0.000686722	4.58443e-06	1.98826e-05	4.74908e-06	4.7259e-05	0.000178114	0.000627141	0.000178712	1.13192e-05	0.000591258	6.09829e-05	0.00028488	0.000501857	9.5891e-05	2.01495e-05	8.33826e-12	0.000161455	9.57634e-08	1.28279e-05	0.000156539	6.33801e-06	7.73449e-05	1.76554e-05	0.000891248	7.11708e-05	0.000387326	0.000427896
			4.34103e-05	5.76795e-05	5.35197e-05	0.000167672	0.000327284	0.000289531	0.000151098	0.000247757	7.94191e-05	2.51097e-07	0.000159312	1.21152e-06	9.40945e-05	0.000346467	0.000279026	7.44871e-05	0.000124394	0.00130406	0.000682505	0.000847429	0.000324232	0.000133821	0.000418935	6.27716e-05	4.58629e-06	0.000228184	0.0020821	0.00109586	3.30098e-05	0.000278014	0.00207594	3.06387e-05	0.000109286	0.000292823	0.00166804	9.49308e-05	4.74064e-05	9.94834e-06	0.000106389	0.000952862	1.43236e-05	0.000113595	0.00139466	0.000198601	0.000179578	2.62707e-05	0.00262725
			0.000180276	5.1981e-06	0.000614216	0.000141971	1.59618e-09	2.31796e-06	0.0001678	0.000115336	0.000104796	9.2407e-05	4.3508e-07	0.000896068	0.000350744	0.000713703	0.00079127	0.000216675	0.00034668	0.000472944	0.000867522	5.38494e-05	1.41658e-05	0.000377968	0.000101118	0.000195758	9.89362e-06	0.000381111	3.96e-05	0.000222332	0.000370939	0.000218086	4.29628e-05	0.000414195	0.000470036	0.000598867	0.000357948	0.00234111	2.00245e-06	0.000177642	0.000410459	0.000522563	0.000157692	0.000217343	0.000113794	3.99572e-05	3.11878e-06	3.01636e-05	0.000413293
			2.90666e-05	2.18766e-06	0.000306003	0.000327703	1.75844e-05	0.000279516	5.81806e-05	1.94133e-06	0.000128898	0.000150653	9.76955e-05	0.000780919	0.000179236	0.000216524	0.000511823	4.58483e-05	4.05163e-05	0.000244455	0.000121503	0.000400537	0.000354746	0.000262175	2.1655e-06	8.28341e-05	9.66115e-05	0.000518364	1.34886e-05	0.000117516	0.000620226	9.58998e-05	4.31428e-05	2.5641e-05	0.00134532	0.000199999	0.000706407	0.000365205	0.000259829	0.00076652	0.00129523	0.00181887	0.000689058	0.00234684	0.000714056	0.000778598	0.000221197	5.41673e-05	0.000106109
			0.000216618	0.000162103	1.22779e-06	0.000158525	5.17175e-05	0.000191997	5.51338e-05	0.000218886	7.31439e-07	3.17485e-05	0.000107517	3.34791e-07	0.000800855	6.22748e-05	9.51537e-08	0.000156865	0.000254817	0.000521332	3.38547e-07	2.31298e-05	0.000810112	0.000102723	8.74617e-05	0.000105378	4.19223e-05	0.00131443	0.000172159	3.67319e-05	6.66536e-05	0.000170389	0.000644336	0.000691325	0.00140643	0.00121279	4.089e-05	0.000639756	0.000171406	2.13113e-06	0.000314011	0.00104199	0.000272158	8.52877e-06	0.00126196	0.000547294	0.000461711	0.00335858	0.00155886
			0.00048036	1.42121e-05	0.000103029	0.000271011	2.72957e-07	0.00032246	8.22471e-05	0.000273884	0.00104519	2.12219e-05	0.000218738	1.50809e-06	0.000124404	0.000101193	0.000712549	0.00110882	2.96071e-05	0.000228811	8.47349e-06	0.000130953	0.000773254	0.000390646	0.000351869	9.25775e-07	0.000706554	2.19198e-07	0.00170407	3.88216e-05	0.000344509	0.000123939	0.000236548	1.6762e-06	0.000613828	0.000370112	0.000324824	0.000318763	2.32941e-05	0.000352218	1.05394e-05	0.000308859	4.65923e-07	7.10419e-06	0.000584089	9.50066e-06	2.40794e-06	0.000149415	0.00198644
			3.3514e-05	1.74357e-05	0.000266581	0.000271465	6.32169e-05	0.00023794	0.00022134	4.05512e-05	2.13277e-06	0.0003204	0.000385663	2.14209e-05	9.73929e-06	0.000168336	7.5949e-05	0.000283358	0.000401761	0.000274928	0.000631918	9.18597e-05	0.000282946	5.92593e-05	0.000222701	2.06519e-07	0.000613632	0.000150474	0.000250461	5.35386e-05	5.04999e-05	5.29932e-06	0.00021811	0.000122548	0.000900468	0.000761978	0.000751836	0.000526514	0.000734778	0.000126394	0.00104223	0.000456591	0.00014957	0.000799021	0.000271927	0.000125602	5.15331e-05	3.17069e-06	0.00205821
			8.41051e-06	1.76925e-05	4.56088e-05	0.000619423	2.62633e-05	6.96843e-05	7.53307e-05	2.00478e-06	0.000110104	0.000135855	0.000154087	9.5506e-05	6.59941e-05	0.00040817	0.000414139	0.000628871	0.000857194	0.00229473	3.28186e-05	4.70694e-05	0.000454233	0.000503051	0.000451319	7.45309e-05	0.000238466	0.000611049	0.00208937	0.000401014	0.00050792	0.00143983	0.00014866	0.000345257	5.15741e-05	1.69855e-05	0.00321092	0.000209067	0.000544117	1.49251e-05	0.000127092	0.00115307	0.000345108	0.000198992	0.000729078	5.7262e-06	0.00134262	0.000347136	0.00286095
			2.02495e-05	4.39623e-05	0.00021742	0.000172936	0.000362562	9.92217e-05	0.000456469	0.000467304	0.000178578	2.03857e-05	0.00186018	2.39303e-06	0.000386562	0.000562648	2.83698e-07	2.84255e-05	0.000157146	1.29275e-05	6.03794e-06	5.08389e-05	5.0056e-05	0.000156496	0.00100753	0.00108608	8.28881e-05	0.000335262	6.75518e-05	6.49285e-05	8.12664e-05	0.000564146	0.00269433	0.00200454	0.00124261	0.000912741	0.000121449	0.00082126	0.00108996	4.78613e-05	0.000660155	0.00240136	0.000690718	0.00030939	0.00164321	0.00115377	0.0016956	0.00132676	0.000211119
			0.000366481	0.000351592	0.000287388	3.51119e-05	2.97152e-05	2.41911e-09	4.72743e-05	0.000322327	0.000810457	6.19677e-06	0.000589598	0.000143939	0.00075086	2.26491e-05	3.95038e-06	0.00185622	2.09606e-05	3.75309e-05	0.000126627	6.52457e-07	1.96143e-05	0.00110238	2.08914e-05	0.000249053	2.28005e-05	4.25137e-06	0.00160272	0.00230323	1.3427e-05	0.00110753	0.000128494	0.00144598	0.00120999	2.9321e-05	1.33138e-05	0.00104927	0.000903518	3.43369e-05	0.000399598	0.000189007	6.22853e-08	4.27543e-06	0.000117653	0.00152519	0.00105541	0.00245699	0.0018849
			8.3602e-05	4.449e-05	0.000126712	8.40797e-05	1.54324e-05	0.000146178	1.28428e-06	0.000205105	0.000258885	0.000222685	3.73316e-08	3.15797e-05	2.49261e-06	0.000726438	0.00141643	0.00103282	0.000225892	0.000406163	1.01133e-05	2.26551e-05	0.00092932	0.000170801	6.35377e-05	5.79577e-05	0.000324178	0.000645091	0.000267236	2.63395e-05	6.94389e-07	0.00154248	0.000658677	0.000375861	0.000190629	0.000591126	0.00136888	0.000623949	0.000132439	4.04034e-05	2.1334e-08	0.003299	0.000221747	0.000171726	0.000240657	0.00077475	1.82714e-05	5.6946e-06	0.00056152
			0.000214064	5.88904e-06	0.000102017	7.12661e-08	5.57877e-05	0.000264799	5.91967e-05	3.58872e-06	8.02449e-05	1.16344e-05	0.000272601	8.02856e-05	3.39803e-06	0.000107209	0.00028045	0.000202393	0.000239408	8.41343e-05	0.000588922	2.30545e-07	0.00100699	0.000668148	0.00186607	0.00172763	4.01949e-06	0.00017991	0.000209899	0.000427642	0.000136333	0.000120209	0.000460072	0.000260257	0.00112821	0.000450092	6.72458e-06	3.72248e-06	0.00115524	0.000166443	0.000304684	0.000876514	0.000168201	2.02273e-05	0.000906751	0.000152847	0.00151903	0.000141164	7.87512e-05
			0.000275383	0.00015523	7.60451e-05	0.000100856	0.000171245	1.2925e-06	4.5942e-06	0.000352608	5.79729e-09	0.000146225	0.000374658	8.25992e-05	0.000231034	1.28411e-05	0.000901741	0.000256246	1.49589e-05	9.18808e-05	0.000404252	3.42271e-05	0.000253742	0.00159499	0.000175537	8.35655e-06	0.000431616	0.000268972	0.00189818	0.000564363	3.20124e-05	0.00106481	4.51176e-06	9.28574e-06	2.00499e-05	0.000409753	8.32366e-05	0.000130995	0.000738813	0.00311562	0.000379247	0.000126163	6.06067e-07	1.08835e-05	1.63938e-05	0.000398165	0.000869073	0.00469141	0.000457644
			1.91836e-05	1.32593e-05	0.000157708	0.000360544	0.000330763	0.000276864	1.75344e-06	6.62351e-05	6.82474e-05	0.000707045	0.000486886	0.000728277	2.69903e-05	0.000134295	2.92022e-05	0.000113318	1.30936e-05	0.000242162	2.49241e-05	0.000329334	0.00133079	0.00165264	0.000526281	0.000283299	0.000194423	0.000559408	0.000161785	0.000633462	5.76243e-05	1.4928e-05	7.45997e-05	0.00031584	0.000492169	0.000137305	0.00374878	0.000868416	6.96918e-05	0.000199148	0.000529417	0.000992174	0.000408275	8.10014e-05	1.30506e-05	0.000687869	9.09674e-05	3.14501e-05	0.000116734
			0.00039783	2.70869e-05	4.95752e-05	0.000893129	3.92713e-06	0.000195275	0.000568592	2.59063e-05	5.55616e-05	0.000122349	0.00206707	1.14185e-06	0.00139871	0.00083771	0.00158062	0.000455338	0.00120014	0.000791769	3.48114e-05	0.000711549	0.000130856	0.000394261	0.00105153	0.00309888	4.57741e-05	0.00238137	0.000185998	0.000521101	0.000218177	4.38504e-05	0.00268937	0.000522092	0.00213258	0.000385523	0.000664156	0.00238301	0.000368178	0.00078307	0.00145653	0.00502318	0.000507463	0.0013478	0.00491456	0.000901991	0.00611916	0.00285393	0.000191938
			7.25075e-05	4.40893e-05	3.73104e-06	2.92267e-05	4.01758e-05	1.48807e-05	6.55276e-05	2.86089e-06	0.000628265	0.000218171	0.000679621	3.63623e-05	2.74523e-05	1.73068e-07	0.000116643	0.00269756	8.55915e-08	1.70748e-05	0.000410183	0.00215911	0.000893728	0.00126168	0.00121388	0.000567114	9.50419e-05	9.38488e-06	8.67478e-06	0.000636855	0.000327347	0.00115698	0.000110428	0.000345963	0.00120001	0.000947104	1.09814e-05	9.64439e-05	0.00137481	2.55093e-05	0.00015476	0.000121296	3.45214e-05	0.000462479	0.000336866	0.000402527	0.00027267	0.000123578	0.00202961
			0.000203221	0.000805315	0.00056676	0.000620455	0.000140685	0.000132519	0.00045986	0.000455191	0.000458841	4.9971e-05	0.00160903	0.000221016	0.000716348	0.00168241	0.00188048	0.00149317	0.0023414	0.00110366	0.00011635	8.7496e-05	0.000220734	0.00010637	0.000871918	0.00189845	7.99671e-05	0.00234762	0.000415174	0.000675468	0.000232924	0.000192902	0.00299201	0.00167655	0.00186874	0.001155	0.00060093	0.00303885	0.00161686	0.00103617	0.00156243	0.00191361	0.000744419	0.00133348	0.00344589	0.000303734	0.00476218	0.0042771	1.73106e-06
			0.000292731	9.90535e-06	0.000294043	2.50945e-05	0.000153289	0.000200613	0.000162749	0.000386234	6.67686e-08	9.24355e-05	3.10973e-05	1.83249e-05	0.000398106	6.4205e-05	1.61964e-06	0.00122425	0.000380711	0.000119858	0.0012191	0.000162265	0.000787027	9.59951e-07	7.44448e-06	5.4553e-06	6.36372e-05	5.23167e-05	7.52502e-05	0.000332363	0.00108805	0.00163727	0.000176345	0.00183469	0.00301347	0.000846544	0.000175686	0.00144781	0.00145184	9.08532e-05	0.000615258	8.66828e-07	0.000182959	0.000324167	0.00012504	0.000473507	0.000411506	0.00115914	1.75529e-05
			2.43984e-05	0.000166487	2.44201e-06	0.00170864	0.000227029	0.000102658	0.000104612	2.40141e-05	0.000722973	0.00042327	0.000139923	0.000133701	0.0010142	0.000405167	0.000184176	0.000228638	0.00152707	0.00147134	2.69522e-06	0.000142812	0.000725392	9.74852e-05	0.000777103	0.000686848	0.000368812	0.000486299	0.000158925	0.000984966	0.00154348	0.000115218	0.00141519	0.000526901	0.00113612	0.00080157	0.00154232	0.00165621	7.75749e-05	6.42456e-05	0.000735798	0.00189953	0.000679313	0.000969707	0.00242419	9.43701e-05	0.00168565	4.69652e-07	0.00201103
			0.00052704	0.000186382	1.58917e-05	1.42729e-05	0.000375503	0.000539259	0.000260289	2.11454e-05	1.0215e-08	7.49924e-07	0.000736376	1.29359e-05	0.000319531	0.000159745	0.000714035	0.000168061	0.000206556	1.13408e-05	6.22254e-06	0.000260654	8.29717e-06	0.000454064	0.000501624	0.00140488	0.000294903	0.000140736	0.000759095	0.000621502	7.25931e-05	0.000119009	0.00136727	0.00110524	0.000473171	0.00141907	8.31689e-05	3.42469e-05	0.00121711	0.000288982	0.000858675	0.000280173	0.000200415	0.0020692	0.0003926	0.000427914	0.000198497	4.04418e-06	0.000488953
			2.28314e-05	0.00019728	6.6441e-05	8.40151e-06	0.000584133	0.000117181	0.000234978	0.000149245	0.000475263	4.19943e-06	6.98288e-05	0.000375	0.000216216	0.000116174	0.000363354	8.48461e-05	0.0006574	2.84437e-05	1.55098e-05	0.000443952	1.64636e-05	0.000905225	0.000371511	0.000356812	0.000803669	0.000295365	0.000151464	0.000612916	0.00143875	4.35283e-06	9.80743e-05	0.000910732	4.64959e-05	5.86748e-05	0.00129014	0.000431403	2.87584e-05	1.34439e-05	0.00256902	0.000550607	0.000976017	0.0046421	0.00160073	8.45882e-05	1.30892e-05	0.00121255	2.34243e-06
			2.94115e-05	5.92318e-05	0.000106312	7.03581e-05	2.65637e-05	5.83931e-05	5.044e-05	0.000921942	0.00111641	0.000661234	0.000243689	9.85071e-06	2.38684e-06	6.39152e-06	8.82848e-06	0.000369846	7.51334e-05	0.000105132	0.000138258	2.28914e-05	6.42531e-05	0.00015478	2.26331e-06	1.03767e-06	0.000280365	1.95364e-05	3.28375e-06	1.42656e-05	0.0016251	0.000769375	1.48473e-05	0.000370715	0.000882669	0.000230692	6.37757e-05	0.000689317	0.000198408	1.23819e-05	0.00208726	0.000221884	0.00135725	4.67224e-05	0.00130178	0.000615044	4.69918e-05	4.74868e-05	1.87428e-08
			8.97197e-05	1.75428e-07	0.000199761	6.00225e-05	0.000604264	1.93877e-06	0.000197393	0.0001092	0.000169067	0.000281585	2.42603e-05	0.00010949	0.000340702	0.000263259	4.05985e-05	6.05216e-05	0.000134981	1.2097e-06	0.000418293	0.000211982	0.000793328	1.06323e-05	1.11944e-05	0.000298659	0.000288308	3.89451e-05	1.92899e-05	0.000217447	0.000230668	0.000307452	3.48502e-07	0.000450266	0.000519177	0.000725983	0.000467573	0.000228441	0.000680785	3.36471e-06	0.00045771	6.82419e-07	0.000412436	0.000296979	3.52204e-05	1.48702e-05	9.2805e-06	0.000193698	1.91647e-05
			0.000292704	0.000139714	1.06828e-06	0.00020801	1.39273e-05	6.06101e-05	0.000239543	0.000239397	0.000328983	0.000116385	0.0015403	0.000204568	0.000222732	6.55779e-08	0.000333775	0.00101402	2.41634e-06	0.000140414	1.86276e-05	0.000777544	2.78574e-05	1.18142e-05	6.85775e-05	0.000266859	1.67704e-05	0.000110418	0.000828246	0.00175518	0.000954675	0.00128119	0.000643624	0.00437022	0.00254314	4.44138e-05	1.51232e-05	0.00250058	0.00353295	0.00075181	0.000403657	0.00021648	0.000153717	7.94278e-05	2.24274e-05	0.00312748	3.47883e-05	0.00539111	0.00182824
			5.6461e-05	0.000187432	0.000201222	0.000111926	0.000129773	1.65212e-05	1.45852e-05	0.000489199	0.000630812	0.000918479	3.1878e-05	0.000504241	0.00116364	0.00108839	0.000749035	0.000962846	0.00107298	0.000178278	0.000148005	8.3955e-07	5.10371e-05	0.000490793	0.00025752	0.000259421	0.000199994	0.000909056	0.000282592	2.28083e-05	0.00157786	6.99247e-06	0.000374092	0.00136366	0.0017154	0.000815369	0.00132476	0.00171488	1.8583e-08	7.61026e-05	0.000810391	0.000555479	0.000999565	0.00213782	0.000762123	3.2037e-05	0.000304976	0.000350802	0.000712534
			4.25853e-05	0.00038218	0.000171284	0.00138311	7.42972e-06	3.80273e-07	2.51494e-05	0.000888701	0.00236019	0.00142011	0.000889447	0.00273666	0.000851561	0.000449552	0.00109019	2.16053e-05	0.00128788	0.000130782	1.10754e-07	0.000830416	0.0011126	0.000475361	0.000175155	9.645e-05	6.07777e-05	0.000772742	0.000229134	0.000904409	0.00128652	0.000187146	7.71469e-05	9.24176e-05	6.13245e-05	0.000679659	0.00519351	0.00204144	0.000174779	0.00080837	0.00102284	0.00147668	0.0028481	0.000145793	1.35497e-05	0.000742478	3.186e-05	0.000173392	0.000786956
			0.000509517	6.22999e-05	1.77103e-05	0.00017252	0.000142431	0.000637625	8.78623e-05	3.38176e-06	1.08105e-05	0.000817764	0.00142244	0.000402152	7.11073e-05	8.99105e-06	0.000269465	0.00040138	9.80601e-06	1.53158e-06	0.000677016	0.000614129	0.000226246	0.000468646	0.000133751	0.000311807	0.000192439	1.21363e-06	4.69646e-07	0.000324239	0.00121017	7.29436e-05	0.000511504	0.00148164	0.000253514	0.000126447	8.86995e-06	0.000404019	0.00207075	0.000448472	2.16863e-06	0.00080826	6.32349e-05	2.59536e-08	0.000578686	0.00143132	0.00272669	0.00943389	0.000278802
			4.2113e-08	7.43561e-06	1.68509e-06	0.0009715	0.000213002	0.00168315	0.000520626	6.64954e-05	3.81748e-05	0.000103869	0.000258111	5.19334e-05	8.59424e-06	0.00144044	1.24081e-05	0.000170052	0.00163056	0.00179911	5.65473e-05	0.000184877	0.000641628	0.00026947	0.000364421	0.00102885	0.000227487	0.00135711	0.00386006	4.35811e-05	1.91295e-05	0.000150532	0.00252455	1.10791e-06	0.000930273	0.00148472	0.000300422	5.19646e-07	1.16654e-08	1.55546e-07	0.000304231	0.00458235	0.00098771	0.00217457	0.00408978	0.000161516	0.00242939	3.12506e-05	0.00233781
			0.000602931	0.000363489	2.07755e-06	0.000169938	0.000773632	0.00116697	0.00010319	0.000175881	0.000184514	0.000194998	0.000495245	0.000799618	3.32529e-06	0.000445868	0.000143253	0.00143868	0.000758894	0.000281306	1.82218e-07	0.000242514	0.000267622	0.000123517	4.85921e-05	0.000706253	9.16898e-05	0.000348364	0.000552847	2.65191e-05	0.00029023	2.92911e-05	0.00365217	0.000137949	0.000865122	0.0024154	0.000219609	0.000116954	0.000432524	1.08919e-06	6.35367e-05	0.00666442	0.000319144	0.00150825	0.0034153	9.39194e-05	0.00102177	0.000359578	2.52104e-06
			2.07981e-05	0.000487738	8.1712e-05	0.000245103	7.00601e-05	0.000719945	8.37385e-06	0.000276729	2.87168e-05	0.000245135	0.000478064	0.000141863	0.0010158	0.000663862	6.66765e-05	0.00210505	9.09207e-06	0.000153045	0.000812443	0.000236821	0.000644265	4.33944e-05	0.000374194	1.60315e-05	0.000338254	1.66628e-05	0.000793605	0.000184831	1.27108e-05	0.000428309	5.94729e-05	0.000625722	0.00046902	0.000105051	2.6043e-05	7.65442e-05	0.0016664	2.06618e-07	9.15314e-05	0.000195992	0.0001409	7.43831e-06	0.000141082	0.00383146	6.59731e-05	2.2615e-07	0.000411394
			6.10529e-05	0.000172649	0.000194852	0.000102862	2.52882e-05	0.000510467	0.000215324	5.45288e-06	0.000482826	0.000272264	9.62381e-05	0.000608394	0.00134592	4.9012e-05	0.000346024	0.000748905	0.00135814	1.87556e-05	0.000819884	0.000530425	0.000779415	0.000203417	3.49128e-08	0.000815956	0.000183486	0.000476982	0.00115785	2.25709e-06	0.000398183	0.000104161	9.13301e-05	7.47326e-05	0.000306707	0.00071168	0.000637076	1.54643e-06	0.000295158	7.57056e-05	0.00012511	1.66945e-05	0.000121897	6.92453e-08	0.000159051	5.01416e-05	0.000483917	0.00139621	0.00189743
			6.77458e-05	2.98526e-05	3.22967e-07	0.00038612	0.000266611	0.000567301	0.000207496	2.12191e-05	3.40113e-06	0.000339478	0.000390757	0.000129478	8.50277e-05	0.00120331	0.00115878	0.000284108	0.000291864	0.00153937	0.000993732	6.14347e-06	4.31199e-06	0.00322898	0.000871624	0.000574829	0.000515271	0.0024864	0.00118048	0.000511656	0.00106888	0.000145859	0.000658336	0.000145025	3.63366e-05	7.15735e-05	0.00162766	8.27778e-05	0.000103005	0.000398981	0.00024893	0.000351389	0.000144229	2.29814e-05	0.00199117	1.25193e-05	0.00277433	0.00135999	0.000327673
			8.09638e-05	0.000504467	4.153e-05	5.77015e-05	0.000197251	0.000126912	0.000134668	0.000193942	0.000172514	4.22754e-05	0.00118176	0.000131759	4.6155e-05	0.000146647	0.00110981	0.000948231	0.000252682	0.000113456	0.000217019	4.09305e-05	0.00036051	0.000192099	0.00170159	0.00215931	0.000188273	0.00114414	1.94059e-05	0.000181917	0.000535272	0.00012804	0.00196341	0.000325912	0.00015264	2.04971e-06	2.00889e-05	5.98986e-05	0.00159222	0.00140047	8.39652e-05	0.000699636	1.32544e-08	0.000161063	0.0027024	0.00284257	0.00458793	0.0045795	1.38783e-05
			0.000171747	1.62111e-05	0.00022195	0.00112468	0.000199441	0.000604383	0.00145752	0.000493422	1.64301e-05	0.000281404	0.000961247	1.12493e-05	0.000192807	0.00190448	0.000553715	0.00108512	0.0019932	0.000378597	0.000641165	0.000278534	0.000570183	0.000105059	0.00149278	0.000902762	0.00100279	0.00282887	0.000564381	9.73777e-05	1.03946e-08	0.000510162	0.00348965	0.00120777	0.0014187	0.00121519	0.000972951	0.00276953	0.000208745	1.00033e-05	0.00125295	0.00262367	0.000541088	0.000817666	0.00266858	6.04666e-05	0.00372169	0.000445196	0.000925139
			0.00123568	0.000314399	0.000203563	0.00108464	0.000239965	0.000514931	0.000454683	0.000223559	0.00139262	7.86112e-05	0.00161176	0.000642847	0.00127964	0.00152039	0.00256047	0.00192592	0.00285326	0.00164761	0.000272443	0.000126818	0.000255448	0.00176508	0.00133218	0.00401029	0.000436168	0.00356884	8.25398e-06	0.000558426	0.00124218	0.00143819	0.00323235	0.00133745	0.00398916	0.000878451	0.0014153	0.00369579	0.0016323	0.00145335	0.00251331	0.0018945	0.000945309	0.00265383	0.00215588	0.00321114	0.00810218	0.00443364	3.94722e-05
			3.16268e-05	6.8093e-05	0.000160854	0.000477435	3.67074e-05	0.00107349	0.000313054	0.000801091	0.00035977	2.13393e-06	7.74726e-05	1.75929e-07	0.000721191	0.00022033	1.09122e-05	0.00193642	0.00119324	0.00037439	0.00116177	0.00106286	0.000342636	1.25665e-05	7.56245e-07	0.00029131	0.000342256	0.000343131	0.00262259	2.39406e-06	8.50361e-06	4.89722e-06	0.000214097	1.85984e-05	0.00112971	0.00302947	5.61858e-05	0.000138478	1.70206e-06	8.46669e-06	1.38871e-05	0.00171094	0.000417004	1.19223e-05	0.00302385	0.000749374	0.000380994	0.00191815	0.00265277
			6.83667e-05	2.93196e-05	0.000231402	0.000795122	1.10568e-05	9.26062e-06	0.000238023	7.35722e-06	5.53688e-05	0.000204402	0.000573589	0.000588443	3.89567e-05	0.000193913	9.54653e-05	0.000263924	0.0013049	0.000499119	0.000546457	0.000359921	0.00120197	0.00010695	1.98782e-07	8.35458e-05	0.000291584	0.000163571	0.000684891	3.01297e-05	0.000553255	7.88545e-05	0.000431704	8.79084e-05	0.000590525	0.00142652	0.00109637	0.000721258	3.32419e-06	0.000550814	0.000369566	0.000542756	0.000694547	0.000318915	0.000190229	0.00131036	0.000115409	0.000516013	0.000989656
			0.000105815	0.000270779	3.62309e-07	3.6646e-06	0.000156889	0.00134316	6.97728e-05	5.19058e-05	6.30607e-06	0.000155928	9.26601e-05	0.000373074	0.00119306	0.00598659	0.00025149	0.000333778	0.00413852	0.0110907	0.000125086	0.00203621	9.31268e-05	0.000118024	0.00204796	0.00482726	4.66933e-05	0.000797223	0.000369384	1.4195e-06	0.000491031	0.000955704	0.00234162	0.000726594	0.000371049	0.000983898	0.00384559	0.000318153	0.000382739	9.67475e-06	0.00187672	0.000797967	0.000884206	0.00439607	0.000710101	0.000712693	0.000881536	3.78988e-07	0.000272836
			2.73405e-06	0.000115567	0.00023476	0.000766305	5.95602e-05	0.000145669	0.000958322	7.92438e-05	5.9117e-05	0.000703904	0.000227385	0.000391539	0.000471645	0.000851917	0.000995521	0.000569418	0.00182478	2.64474e-05	0.000752426	0.00147542	3.96231e-05	8.98993e-07	1.65128e-05	6.07433e-06	0.000243651	0.000480877	0.000233517	0.00109002	0.000700318	0.000412549	0.000581411	0.000399482	0.00379146	0.000765858	0.00148193	0.00246737	0.000195072	3.65758e-06	0.00244048	0.0010629	0.00112838	0.000642096	0.00057789	0.00019826	0.000186385	2.28664e-05	0.00298279
			0.000461551	0.000435539	0.00067242	0.00178371	0.000220193	0.000476004	0.000223535	0.000599857	0.00052107	0.000111195	0.000909259	0.000192752	0.00109203	0.00095567	0.00172139	0.00207381	0.00263402	0.000284272	0.000942178	0.000454265	0.000343062	0.000537902	0.000189899	0.000694904	0.000806797	0.00167666	0.0020832	0.000433177	0.000819324	0.000497821	0.00186509	0.0016303	0.00407173	0.0015791	0.00131589	0.00364542	0.00154733	0.000796993	0.00265429	0.00102347	0.00117137	0.00157545	0.0015388	0.000131323	0.00345857	0.00163972	0.00102669
			0.000149108	0.000472448	1.33593e-05	3.43186e-05	0.000242089	9.90978e-05	1.84705e-05	0.00131165	0.00165497	5.9812e-05	2.13217e-05	0.000194154	0.00104452	0.000291177	0.000265466	0.000254122	0.00120224	8.17739e-05	0.000161496	0.00125982	0.000134717	0.000334744	0.000334592	2.51845e-05	0.000352804	0.000226123	0.000879114	0.00214193	3.90646e-05	0.000486593	1.02581e-05	0.00322355	0.000704607	0.000305691	0.000644614	0.00223937	0.00213749	0.000474867	0.00217712	0.00106532	0.000659053	0.000345273	0.000694108	0.000239839	0.00108452	0.000472286	0.00112504
			0.000841377	0.000352839	0.000356735	0.00114744	2.493e-05	0.00116562	0.000903491	0.000204975	7.32548e-05	0.000203218	0.00113759	0.000165505	0.00130974	0.0011256	0.00295271	0.00272509	0.00209842	0.00118644	0.000737384	0.000906617	0.00176605	0.000801648	0.000918604	0.0020511	0.00038779	0.0035537	0.000852134	0.000365503	8.06718e-05	0.000590273	0.00354322	0.00184109	0.00583551	0.00178516	0.00210488	0.00629816	0.0013799	0.000582974	0.00147867	0.00375848	0.000452299	0.00208839	0.00387303	0.000600766	0.00590544	0.00192877	0.000870584
			0.000159963	0.000122079	0.000323323	0.000825294	3.5573e-05	2.19615e-06	0.0010101	0.0003368	0.000348401	8.54911e-06	0.000848473	1.19709e-05	0.000375155	0.00141913	0.000389336	0.00109257	0.00177906	0.000565543	0.000425178	7.6318e-06	0.000158549	0.000825914	0.00035622	0.000466813	0.000360925	0.00263908	0.000244566	0.000488666	0.000446693	0.000178447	0.00204311	0.001882	0.00502232	0.00168495	0.00206262	0.00400063	0.00111867	1.89929e-05	0.00184812	0.00138755	0.000677733	0.0013235	0.00119984	0.000128015	0.00152145	0.000445515	0.000864875
			1.44049e-05	0.00110601	7.92703e-06	7.67064e-05	0.000395726	7.86349e-08	6.59159e-05	0.00212714	0.00357699	0.000169562	0.00018338	0.000671037	0.00305899	0.000956588	7.49184e-05	1.51157e-06	0.000814564	7.35101e-05	0.00024256	0.00156221	7.14996e-05	0.000125147	0.000932274	0.00154436	3.45621e-05	0.000259706	0.0013831	0.000153244	0.00145346	0.00104852	0.00120432	0.003508	0.000959897	8.78569e-06	0.00392616	0.00337998	0.000633099	0.000572576	0.000849132	0.000860092	0.0011513	0.000535885	0.000104458	0.00322793	0.00228045	0.00665861	0.00200397
			5.57157e-05	4.42386e-06	0.000499195	0.000139262	6.89151e-06	6.19954e-06	0.000192883	0.00012222	1.57995e-06	0.000281853	0.000228795	1.88659e-05	0.000129379	7.56232e-10	0.000259654	0.000811803	0.00029817	2.99148e-05	0.00119936	0.000575301	0.000737048	0.000154131	0.000401061	0.000284683	0.00056162	5.25817e-06	0.000345669	5.00771e-05	6.50477e-07	0.000538888	7.2022e-05	0.000563641	0.00262169	0.000569337	0.000130781	0.00101324	0.000212541	0.000100459	0.000352689	4.50389e-07	0.000730123	0.00124112	0.000234968	2.96866e-05	2.91759e-05	0.000367253	9.55758e-05
			0.000151642	6.60863e-05	2.05318e-05	0.000200647	6.72899e-06	3.31602e-08	1.59049e-05	4.82826e-05	8.78363e-05	0.000732753	3.54533e-08	0.000252188	0.00119381	0.000198955	5.01658e-06	0.000334748	0.000819912	8.16769e-05	0.000745824	1.04667e-07	0.000219957	5.4547e-08	0.00107373	0.00021867	0.000503656	1.33254e-05	0.00030649	8.58929e-06	0.000204625	1.81093e-05	0.000701362	0.00182395	0.00169914	0.000838037	0.000550407	0.00246165	8.48828e-05	0.00053671	0.000708011	0.000229001	0.000112734	0.00119999	0.001168	5.7701e-05	0.0011953	0.000219376	0.000137375
			3.70115e-05	9.88158e-05	0.000173236	0.000175089	2.02566e-06	8.65206e-05	3.47557e-05	0.000268821	0.000667342	7.13771e-05	6.64305e-05	0.000563737	8.75063e-05	0.000135041	0.000200385	0.0012034	0.00139967	3.42087e-05	0.000748711	0.000694368	9.92655e-05	0.000364539	1.54274e-05	2.07839e-06	0.000711293	0.000402871	2.42348e-07	2.67544e-05	0.000844016	0.000213212	3.43942e-05	0.00114349	0.00111692	0.000261088	0.000460822	0.00134573	8.5871e-06	9.05382e-06	0.000704378	4.23981e-05	0.00114713	3.69896e-05	3.45206e-06	0.00019332	8.51922e-05	0.00106011	0.000456876
			4.2321e-05	0.000176358	0.000276949	0.000170682	1.24631e-05	0.000165863	0.000183823	2.20968e-05	0.000159152	0.000128078	0.000410289	7.41136e-05	3.89479e-05	9.8338e-06	0.000424181	0.000554205	0.000283701	2.08063e-05	0.00117496	0.00051713	0.000182628	0.000403977	0.000133234	5.61067e-06	0.000968589	0.000105032	0.00196405	0.000130557	0.0007959	0.000638133	0.000142888	0.000506905	0.000949131	0.000331425	8.05456e-06	0.000110761	0.000325024	0.000159557	0.00021793	0.000949237	0.000391985	3.78682e-05	1.84235e-05	9.72016e-05	5.83954e-05	0.000616415	0.00101023
			6.61665e-05	0.000361414	6.1582e-07	2.75418e-05	8.99268e-05	1.17895e-05	0.00175225	0.000280007	0.000269111	0.000893149	0.000123855	0.000212477	5.3608e-05	0.000751333	0.00161249	0.000510242	0.0014193	0.000611618	0.00107773	6.06159e-05	0.000472084	0.000244612	0.00018213	1.15457e-05	0.000678483	7.5807e-06	0.000387065	1.04757e-06	0.00344495	0.000482432	0.000671444	0.00255631	0.00241837	0.00179396	0.000151772	0.0033408	0.000520139	0.000197209	0.00210372	0.000222996	0.00137537	0.00216082	1.1133e-06	6.81368e-05	0.000871085	0.000190038	1.35379e-05
			0.000222465	1.98516e-10	0.000217986	0.000627738	1.94531e-05	4.11397e-05	0.000319175	0.000154529	4.95319e-06	0.000341326	6.03834e-05	6.81672e-05	0.000410223	9.20783e-05	0.000115409	9.90021e-06	0.00240342	0.000134225	0.000268191	0.000163065	0.000627209	1.59428e-05	7.49136e-05	0.0001051	0.00167932	0.000242898	0.000970081	6.34607e-06	0.000943148	0.000232725	0.00027439	1.77821e-05	0.000416306	0.00375686	5.77738e-05	0.00045203	0.000180856	0.00146808	0.000316673	0.00368014	0.00134376	0.000909404	0.000577345	0.00131092	3.48972e-06	0.0014095	0.00169473
			0.000221716	8.40063e-05	0.000516027	4.72112e-06	0.000189282	1.71912e-05	9.66218e-05	7.24539e-05	3.70014e-05	0.000551186	5.93745e-05	3.89882e-05	0.000624771	1.07758e-05	2.29851e-05	0.000505293	0.00157314	0.000268836	0.000747225	0.000288303	0.000155561	3.1846e-06	0.000599285	0.000430628	0.00162607	0.000825356	0.000192186	0.000459934	8.99034e-05	1.00708e-05	3.75791e-05	0.000578227	0.00349103	0.00225136	0.000266134	0.000991228	4.04283e-05	0.000836837	0.000129771	0.000176591	0.000378279	0.00153638	0.000103747	0.000212032	0.000371291	0.000874327	0.00178737
			0.000450808	0.000364424	0.000512285	0.00118926	7.39711e-08	0.000555383	0.000287645	3.54219e-05	0.000470357	0.000423271	0.00114293	0.000320223	0.000836703	0.00185805	0.000636716	0.00101086	0.0017121	0.000791411	0.00100868	0.000601218	0.00158325	0.000160989	0.000288014	0.000308071	0.00203191	0.00121267	0.00154919	0.00015077	0.000691428	0.000362704	0.00186763	0.000586683	0.00477729	0.00150482	0.00216187	0.00292921	0.000290758	7.39259e-05	0.00502958	0.00245097	0.00172574	0.00196118	0.00127479	5.47366e-06	0.00211199	6.88188e-06	0.00260223
			0.000601116	0.000159166	0.000300941	0.00112777	0.00011373	0.000728548	0.00159357	0.000363862	0.000409955	0.000145581	0.00222149	0.000185207	0.000881727	0.00164567	0.00105639	0.00304068	0.00222621	0.001107	0.000282231	0.000464935	0.000217973	0.00061691	0.000201019	0.00174552	0.000386195	0.00228136	0.000459283	0.000641773	0.000302858	0.000939627	0.00490891	0.00355774	0.00649053	0.00225947	0.000867143	0.0043152	0.00117177	0.000733726	0.00419096	0.00241793	0.00113433	0.00305345	0.00419533	0.000175117	0.00380251	0.00200684	0.000852655
			0.000129296	0.000782511	0.000404435	8.91557e-05	0.000135381	2.35857e-06	0.000358415	6.38547e-05	0.00076247	0.000100415	0.000267437	1.7027e-06	0.000283747	0.00115073	8.20162e-05	0.00150439	0.000476493	0.000109366	6.51045e-05	0.000162202	0.00116179	9.01179e-05	4.09756e-06	3.4946e-05	0.00045497	6.24321e-05	0.000404571	0.000134243	0.000958133	0.00375476	0.00210033	0.00310266	0.00167866	0.0012702	0.000166236	0.00203338	0.00194354	0.000103561	0.00117768	0.000409015	0.000582573	0.000877908	0.000454296	0.000186806	0.000526007	0.000664119	3.19222e-07
			0.000419069	0.000555124	0.000447291	0.000993811	8.14854e-05	0.000586044	0.00162289	0.000440374	0.000737301	0.000914278	0.00246488	0.00035417	0.00112517	0.00269101	0.00369718	0.00366555	0.00404546	0.00113699	0.000873708	0.000129111	0.00169985	0.000585874	0.000424308	0.00177531	0.000351508	0.00286041	0.00077631	0.000437379	0.000711302	0.000931744	0.00388146	0.00427872	0.00692202	0.00304322	0.00234447	0.00476549	0.00276693	0.0012151	0.00400872	0.00240712	0.00139778	0.00333376	0.0039182	0.00257255	0.00500155	0.00353069	0.000666202
			4.98844e-07	2.314e-06	0.000206166	6.75636e-05	5.57106e-05	1.90328e-05	5.58283e-06	9.43705e-05	0.000271829	0.000548401	0.00127873	0.000752114	7.47214e-05	1.3158e-05	0.000114091	0.000557714	0.000723759	8.91234e-05	0.000430574	0.000123445	0.000558775	1.09982e-06	0.000886845	0.000460219	0.00118623	0.000259072	5.37907e-05	2.79333e-05	0.000120487	4.21188e-05	1.9512e-05	0.000654119	0.00153136	0.00125125	0.00169936	0.000945452	0.00105311	0.000892578	0.000671748	0.00092885	0.00139476	0.00020537	0.000111045	0.00216047	0.00154301	0.00293117	0.00083723
			7.75792e-05	0.000563449	0.000622141	0.000152925	0.000153374	0.000171277	0.000157004	2.32162e-05	0.000386576	0.000755044	8.9166e-05	0.00152259	0.000199201	0.000932507	0.000587097	0.00129058	0.00136275	0.000394528	0.000374084	0.000812267	0.00237186	0.000723524	9.36616e-08	1.57399e-05	0.00116939	0.000891897	0.00324309	0.00152253	0.000117287	4.39707e-05	0.000593651	0.00174647	0.00181362	0.00320527	0.000693402	0.0026931	0.000176269	0.000122479	0.0024773	0.00010718	0.00136794	0.00115147	0.000614248	0.00261126	2.75804e-05	5.84176e-05	0.000737055
			3.06121e-06	9.86558e-06	2.85351e-05	0.000457173	3.24371e-05	0.000285581	0.0010168	0.000211547	0.00107907	0.000355468	0.0010036	0.000800423	0.00019548	9.6037e-05	1.00604e-06	0.00043057	0.00201305	0.000188449	0.00164063	0.000162245	0.000291871	1.0662e-06	0.0005662	0.000680648	0.00206208	0.000107942	0.000577991	0.000547723	0.00232496	3.78992e-05	0.000164807	0.000126679	0.000845985	0.00140562	0.00124195	0.00129829	0.000571362	0.00076198	0.00167072	5.53696e-05	0.00322803	0.000380325	0.00163068	0.000541018	0.000380757	0.0034463	0.00359761
			3.27425e-05	0.00074224	0.000691172	0.000269239	3.47013e-05	2.90677e-05	0.000447441	0.00022441	0.000182367	0.000327254	0.000414734	0.000113296	0.00011551	0.000146688	1.40768e-05	0.000804575	0.00137821	0.000393142	0.000494943	0.000188817	0.00182479	0.000153623	0.000929532	0.000291469	0.0027966	1.25814e-05	0.00110456	3.96121e-06	0.000451061	0.00246009	0.00057774	0.00172554	0.00352391	0.00128675	0.000652007	0.00170025	0.000140712	0.00012546	0.00142984	0.00080384	0.00188106	1.98588e-07	1.71728e-05	0.000394097	0.000133549	2.89119e-05	0.000985554
			9.70276e-06	1.51533e-08	0.000296214	0.000199702	0.000983854	6.13965e-05	0.000656304	0.000266356	4.41112e-05	0.000733988	5.8358e-05	0.00222032	1.42232e-05	0.000505166	4.62749e-05	1.41193e-05	0.00244379	8.47597e-06	0.000464491	5.06856e-05	0.00069114	0.000403793	0.000357338	0.000142245	0.000936704	2.39178e-05	0.000355764	3.72326e-06	0.00044826	0.000533174	4.28285e-05	0.000452475	0.000258987	0.00100808	0.00248387	0.00149539	1.63183e-05	0.000426326	0.000920283	8.19868e-05	0.00127155	0.00157	2.40036e-06	7.42434e-09	8.31931e-05	0.003279	0.000723154
			4.63823e-06	4.03675e-05	0.0001986	3.10138e-07	7.07522e-07	2.23539e-07	2.36248e-06	0.00019516	0.000395438	0.000397512	0.00571012	8.37149e-05	0.000232383	0.00174012	0.000846386	0.000342849	0.000151064	0.00262777	0.00214546	0.000836322	0.000990266	6.86613e-05	0.00378455	0.00660976	0.000217757	0.00358717	0.000169066	0.00174662	0.000297968	0.000913686	0.00325355	0.00045288	2.45412e-06	6.80347e-05	1.51859e-06	1.46672e-05	0.00434425	0.00104819	8.10722e-05	0.00192721	0.000168201	0.00375834	0.00794504	0.00184645	0.00669854	0.00605696	0.00120355
			0.000591933	0.000714788	0.000620506	0.00202251	0.000124106	0.00115027	0.00139579	0.000165883	0.000902244	0.000129192	0.00437494	0.000467183	0.00201856	0.00494749	0.0039039	0.00554316	0.00501584	0.00280181	0.000385414	0.00230106	0.000644939	0.00109428	0.000639267	0.00553723	0.00114378	0.00750923	0.00109099	0.00119567	0.00100873	0.00131666	0.00549046	0.0042015	0.0101044	0.00265272	0.00272348	0.00728434	0.00345578	0.00166794	0.00486188	0.00615516	0.00163433	0.00609395	0.00784736	0.00284545	0.0112027	0.00520791	0.00177636
			5.61851e-06	2.46848e-05	0.000416968	0.000592843	0.00033061	7.55184e-05	0.000706136	2.51547e-05	0.000175343	0.000575291	2.09916e-06	0.00053209	0.00124631	0.00142636	0.000107461	0.000737077	0.00136696	0.000346257	0.00137704	8.29752e-06	9.07955e-05	0.000398464	0.000248716	7.53099e-05	0.00341398	2.0433e-07	0.000306694	0.000206281	0.000571574	0.00036651	0.000653297	0.00239045	0.00523201	0.00282035	0.00113165	0.0026574	0.000135569	0.000216073	0.00186436	0.000109559	0.000930376	0.00121911	2.52413e-05	6.71011e-07	4.93276e-06	0.000599877	0.000502725
			2.54488e-05	2.99085e-05	0.000211183	0.000108258	0.000185118	1.13979e-08	0.000106363	1.49259e-05	0.000661281	0.000654063	7.35235e-05	1.42346e-06	8.10433e-05	1.39821e-07	0.000633216	0.00147099	0.000281221	0.000274164	0.000590176	8.02689e-05	0.00219489	3.05756e-06	0.000168803	0.000784365	0.00195511	0.00129992	5.51739e-05	0.000325469	0.00091523	0.00272113	2.78454e-05	0.00226501	0.000899764	0.000431898	0.00017743	0.00154803	2.16479e-07	0.000105048	0.00146524	0.00101678	0.00117499	0.000945156	0.00319071	0.000302947	0.000486483	0.00199127	7.03211e-05
			0.000109363	0.00025778	0.000503964	0.000549203	0.000353104	0.000160321	0.000389048	0.000661422	0.000808286	0.000708864	8.52202e-05	0.00038107	0.00098869	0.00188493	0.000596677	0.00127193	0.00323728	0.0002387	0.00107474	2.30298e-05	0.00168553	1.36268e-06	2.70342e-05	1.63353e-06	0.00188453	6.34571e-05	8.5913e-05	0.00068291	0.00218338	0.00157162	0.000794872	0.00510797	0.00371471	0.00186659	0.00124151	0.00356462	0.00106601	0.000188529	0.00368091	0.00019343	0.00187457	0.00393579	8.03831e-06	3.79283e-05	4.25e-05	6.62709e-05	9.96041e-06
			2.43328e-06	0.0002218	9.00031e-05	1.08469e-05	0.00116134	1.21291e-05	0.000631131	0.000383631	3.57151e-05	0.000393104	0.000458383	0.000935443	1.59897e-05	0.000596794	0.0001011	4.09726e-05	0.00398608	0.000278044	0.000863269	6.15896e-06	0.000445398	0.00090371	0.000199831	4.89402e-05	0.00227203	0.00102415	0.00104036	0.00115489	0.000315716	9.92373e-05	0.00205454	0.000444923	0.000832699	0.000376067	0.00546571	0.00282519	0.00300297	0.00152333	0.00132274	0.000583282	0.00172416	9.01535e-05	0.00129955	0.00116276	0.000119009	0.00271468	0.00261965
			5.66586e-05	2.14268e-05	0.000716812	4.78605e-07	2.15931e-05	0.000325299	0.000377326	0.000370008	0.00134462	0.000875998	0.000760789	0.000153132	0.000510062	0.000104071	0.00135759	0.000967188	1.08937e-05	0.00115147	0.00332508	0.00338648	0.00206655	1.96542e-05	0.0041498	0.00386101	0.00186297	0.00149262	0.00381848	0.0011282	0.0010627	0.00230129	0.000118687	0.000318296	0.00512656	0.00336356	0.000559616	9.95559e-05	0.000101211	0.00362039	0.000360964	0.000258289	1.66067e-06	0.000758065	0.000308041	0.00323565	0.00587447	0.00358468	0.00282189
			2.58039e-06	4.06943e-06	0.000349009	1.8804e-05	2.56641e-06	5.55761e-05	0.000160512	3.99912e-06	6.71536e-05	0.00107467	0.00244924	0.000116263	0.000556113	9.82421e-05	0.000119052	0.00240851	0.00069412	0.000105808	0.00133432	0.000220266	0.000996751	2.08737e-05	0.00198216	0.000358071	0.00187934	0.000441369	0.000927802	0.00101195	0.000571032	0.000917977	0.00010697	0.000628496	0.00202746	0.00103859	0.00106458	0.00207585	0.0016827	0.00213168	0.00302745	0.00103546	0.00307585	0.00159497	0.000776823	0.0013714	0.00203911	0.00537102	0.00203348
[truncated: 128 more columns]

## Sheet: Fig1d_reachFN2
0	8.74172e-06	9.26889e-05	4.99053e-06	6.50469e-05	4.70085e-05	0.00013325	4.69541e-05	8.96231e-05	4.30414e-05	2.1733e-05	2.96573e-05	2.60464e-05	3.07078e-07	7.18304e-05	0.000105103	6.67655e-05	5.33268e-06	0.000270722	8.17913e-07	0.000200897	2.71364e-05	7.23827e-05	0.000106054	0.000124732	1.83156e-05	0.000203432	7.89235e-05	0.00024374	1.18844e-05	0.000417938	3.14566e-05	2.71085e-06	1.75475e-05	2.92863e-05	4.14487e-05	1.16849e-06	0.000256483	6.71502e-08	0.000636485	1.02894e-05	0.000670837	0.00048838	5.59074e-05	9.79052e-09	0.000176168	0.000276247	3.2295e-05	2.74592e-05	0.000131054
5.78874e-06	0	4.64033e-05	0.000146977	1.35635e-05	4.01213e-05	3.7287e-05	8.33357e-05	2.18835e-05	0.000668269	1.32503e-07	2.95813e-07	0.000109977	5.30569e-05	0.000431301	0.000225237	2.50845e-06	4.14911e-07	1.50965e-05	6.70208e-05	5.43198e-05	1.57416e-05	0.000136502	0.000334231	0.000211336	1.43858e-05	1.44459e-05	3.19909e-05	2.46147e-05	3.56359e-05	4.79262e-05	0.000186577	1.39448e-05	9.82024e-05	0.000275369	0.000143474	4.73075e-07	4.3479e-05	1.19004e-06	8.66505e-06	0.000283444	1.59434e-05	2.02143e-05	4.52547e-07	0.000357119	0.000335614	1.46967e-05	7.26e-06	0.000358799	5.48735e-05
6.21605e-05	1.56215e-06	0	0.000138879	0.000282201	5.27647e-06	3.55573e-06	6.81045e-05	3.36809e-06	3.21187e-06	8.01166e-10	0.000215723	1.77891e-05	5.46868e-06	0.000107368	0.000138031	2.052e-05	4.62913e-07	6.22872e-06	0.000139404	5.62381e-05	4.1345e-06	1.08582e-05	0.000225207	2.45898e-05	2.54434e-06	3.42403e-05	4.75787e-05	0.000395164	9.69527e-05	3.26406e-06	3.36027e-05	4.8189e-05	7.40431e-09	6.51731e-05	0.00034697	1.27797e-06	3.70362e-05	4.87049e-05	2.94243e-05	9.21809e-05	8.87123e-05	2.60497e-05	1.61195e-06	1.00825e-06	0.000476328	0.000212754	6.18292e-05	0.000132978	3.90211e-05
4.3896e-06	7.43106e-06	0.000199956	0	2.15769e-05	9.68052e-06	5.57405e-05	9.27259e-06	7.22475e-05	6.40916e-06	5.66508e-07	0.000654011	0.000762303	0.000152772	8.90597e-06	2.86426e-06	5.18758e-06	0.000253368	7.92289e-05	1.79405e-05	0.00015138	0.000116156	1.24993e-05	4.95589e-05	1.04816e-05	0.000263752	1.58052e-05	6.73255e-06	0.000827158	0.000629374	0.000228506	8.45202e-10	8.84597e-06	1.6643e-05	0.000246529	0.00020843	4.72584e-05	2.70216e-05	9.24051e-06	0.000231416	0.000104841	0.00028779	4.28725e-05	3.50151e-05	0.000307511	0.000125871	0.000801463	0.000310857	0.000151917	6.97853e-05
0.000160799	3.3053e-05	6.17029e-05	2.47547e-06	0	6.58472e-05	6.30416e-05	0.000366171	1.4313e-05	0.000102972	3.80085e-05	0.000233564	5.10104e-05	0.000138578	1.77926e-05	0.000161241	1.55525e-05	0.000184597	2.12055e-05	0.000522242	0.000168564	0.000131051	0.000495856	3.52792e-05	0.000187841	1.38094e-06	1.08148e-05	6.81903e-05	5.844e-06	2.22922e-05	0.00018264	5.87681e-06	0.000311606	7.23985e-05	0.000158827	0.000484554	6.38363e-05	2.77861e-05	0.000526587	0.000164255	6.12729e-05	1.29324e-05	0.000226798	8.29983e-06	1.53995e-06	5.46034e-06	6.32209e-07	1.10821e-05	0.000449679	0.000575322
4.47252e-05	1.23438e-05	3.70654e-05	1.19142e-05	7.58981e-05	0	1.55261e-05	1.32026e-05	1.53956e-05	3.82637e-05	0.000144147	0.000344564	1.2119e-05	1.17173e-05	0.000198849	4.84291e-07	1.85045e-05	1.42065e-06	0.000311496	0.000204483	0.000100731	1.20819e-05	0.000174351	0.000124506	0.000143745	4.0984e-05	0.000123994	0.000648459	0.000150041	0.000219479	1.82378e-05	0.000807504	1.03339e-06	0.000102677	0.00095899	7.50493e-08	4.96797e-05	2.96779e-06	1.21341e-07	0.000571357	1.69233e-06	0.000170092	0.000294952	0.000135589	1.73565e-05	5.99326e-05	1.23386e-05	6.86382e-05	0.000130352	0.000261093
1.57485e-05	2.24074e-05	7.1448e-05	6.64764e-05	3.24932e-05	5.82855e-05	0	3.71219e-05	7.35012e-05	3.80986e-05	0.00066693	1.54988e-05	5.19113e-07	3.3689e-05	6.57563e-05	7.04676e-06	4.13839e-05	0.000187614	7.18243e-05	0.000128393	0.000583201	0.00020823	0.000151091	9.18245e-05	0.000385608	2.25467e-05	8.06915e-05	0.00013376	0.000132953	0.000895729	0.000101901	4.45039e-06	2.36924e-05	2.73652e-05	0.000420431	7.5651e-05	0.000147131	5.04013e-05	0.000369782	4.24859e-05	0.000414308	3.95277e-05	8.73771e-06	0.000420709	5.86002e-07	0.000327669	0.000308328	3.88242e-06	2.24703e-05	0.000160696
1.96591e-07	0.000130993	0.000140202	2.72238e-05	0.000383768	7.7107e-05	1.28419e-05	0	0.0017691	2.86042e-06	1.37944e-05	0.000163215	7.93422e-05	0.000168265	0.000522181	0.000275758	0.00052642	2.99381e-05	3.16133e-05	8.8354e-05	1.95793e-06	0.000164473	0.000222907	9.4147e-05	2.07799e-06	0.000100609	0.000480468	4.07569e-06	0.000932646	7.21173e-05	0.000112799	3.1124e-05	0.000157233	7.87054e-05	0.000436334	0.000622172	0.000495913	7.89805e-05	2.22762e-05	4.72791e-05	0.000205828	6.94423e-05	0.000326375	0.000665964	0.000658662	0.000206335	1.48578e-06	5.8511e-05	0.000446732	4.19964e-07
0.0005532	2.11851e-05	1.02611e-05	0.000199214	1.7855e-06	1.68466e-06	5.67896e-07	0.000536687	0	0.000254492	0.000222491	0.000349928	5.93092e-05	3.93757e-05	0.000438717	5.18716e-05	1.1774e-06	0.000201912	3.86704e-05	3.37762e-06	2.01773e-06	0.000337095	0.000265076	0.000363719	7.66566e-05	4.90275e-05	0.000632315	0.000234045	0.00394269	7.31972e-05	0.000505026	0.000256328	2.69228e-06	2.75843e-07	0.000123278	9.02435e-05	0.000415234	0.000613494	7.92879e-06	1.55489e-06	0.000816062	0.00092099	0.000719868	0.00107469	0.000694184	0.000741221	1.08737e-05	0.000895935	7.82852e-05	0.000140961
1.75064e-05	0.000412082	7.05684e-05	1.91097e-06	6.50991e-06	6.24505e-05	9.91542e-06	2.99295e-06	0.000266451	0	0.000240473	8.46643e-05	5.87418e-06	7.36491e-06	0.000161884	3.8124e-05	6.65926e-05	2.78263e-05	7.24227e-05	0.00020632	0.000144571	1.6968e-06	5.60236e-06	1.28969e-05	0.000161364	2.133e-08	2.89518e-06	3.16419e-05	6.03585e-05	5.22141e-08	3.47182e-05	2.4188e-05	8.3495e-05	0.00026391	0.000426123	0.000351043	5.3923e-05	0.00021482	0.000211597	0.000184874	0.000351492	7.86244e-05	1.21976e-05	0.000323034	6.60937e-05	0.00136475	0.000155008	7.03984e-05	0.000586318	0.000183715
0.000293973	6.93099e-06	6.37052e-06	0.000228363	9.39283e-05	0.000304314	0.000794839	6.861e-05	0.000289367	5.0549e-05	0	7.86863e-05	5.6071e-06	0.000383644	4.80141e-05	6.67676e-05	1.10634e-05	9.80411e-06	1.17103e-05	0.000691704	1.72147e-05	2.3774e-06	0.000146703	0.000384383	5.13269e-06	0.000112963	1.68945e-05	0.00172647	0.000115102	3.33243e-07	0.000300409	5.23317e-06	0.00010599	4.74538e-05	0.000208374	7.21144e-06	0.002421	0.000673723	0.000833573	1.75624e-05	8.39265e-05	0.000825559	0.000150261	0.00105021	6.72124e-05	0.00100552	0.000423006	0.000319574	6.66341e-05	1.15921e-05
1.71528e-06	2.56546e-07	0.000478328	0.000613369	0.000226196	8.60435e-05	2.25172e-05	0.000409378	0.000280849	6.18743e-05	8.17428e-06	0	5.00298e-05	0.000276609	0.00023317	0.00042335	0.000486558	0.000407103	7.34608e-09	0.000314193	9.6259e-07	0.000461847	0.000181966	0.000236122	0.000327091	0.000328058	3.74141e-05	3.31389e-05	0.00130723	1.99201e-05	0.000560898	0.000267672	8.65344e-05	0.000604622	0.00136888	0.000128815	3.94793e-05	0.000143621	3.24851e-05	0.000606607	0.000834549	4.24563e-05	1.71204e-07	0.000636607	5.14652e-06	0.00018862	3.31428e-06	0.000499671	0.000614348	0.0018665
7.44548e-05	0.000170117	7.18637e-05	0.00165505	1.25916e-06	4.32746e-07	7.77105e-07	0.000358962	6.45713e-06	5.57867e-05	4.38602e-07	0.000151204	0	1.21786e-05	2.59558e-06	0.00020944	0.000193405	1.73007e-05	0.00064317	0.000423166	0.000170305	0.000200558	0.000149152	2.77057e-05	0.000356804	4.07874e-06	0.000377197	0.000662659	1.87117e-05	7.41862e-05	0.000526536	0.000390134	2.92084e-05	1.03708e-05	0.000192775	0.00010299	4.59485e-05	0.000264456	0.000178891	2.85922e-08	0.000407369	0.000487604	2.01407e-05	0.00015031	3.33394e-05	0.000779498	5.62627e-05	0.000256061	0.000114757	3.82783e-05
8.4418e-05	7.84498e-07	4.63638e-06	9.44736e-05	2.30129e-05	5.95027e-06	0.000168612	8.30613e-05	1.04122e-05	7.44371e-06	0.000182826	0.000107329	9.66678e-06	0	0.000776142	1.89371e-06	0.000259885	0.000967434	2.94529e-05	0.000208505	5.44699e-05	0.000109153	4.03662e-05	0.000179304	1.02488e-05	4.70967e-05	1.02392e-05	0.000201127	0.000120072	0.000121333	0.000342628	0.000111383	7.94607e-05	0.000205927	0.000119829	4.27073e-07	0.00013953	0.000248747	0.000101408	0.000154401	0.000121604	0.000165399	4.0088e-05	0.000169121	0.00021861	5.53148e-06	1.7329e-06	0.000181737	0.000570674	3.11597e-05
8.5613e-05	0.000269231	6.86811e-05	1.29063e-06	5.33675e-05	1.61872e-05	3.25949e-08	7.42206e-05	0.000334497	0.000120787	1.76164e-05	0.00012441	7.19813e-08	0.000668282	0	1.13935e-06	1.24939e-05	8.72033e-05	6.89652e-05	9.6959e-10	5.03572e-05	4.1593e-05	0.000130469	0.000343096	1.1238e-05	0.000855636	0.000104135	2.20469e-05	0.000289156	0.000207532	3.24857e-06	4.01531e-07	7.50368e-06	0.000314475	0.000986962	0.000489458	0.000235007	0.00073627	4.60132e-06	0.000198835	1.14455e-05	0.0003582	2.4544e-05	6.82801e-05	0.000365598	0.000146076	0.000174293	0.00123031	0.000567468	3.38647e-05
0.000362208	3.49336e-05	6.26227e-05	1.06146e-05	0.000280457	9.80787e-05	5.63521e-06	4.98186e-05	5.21068e-05	0.000309697	3.91249e-05	0.000159689	4.2139e-05	8.24309e-07	0.000188715	0	0.000345965	1.63827e-07	0.000441498	0.000317786	4.9951e-05	1.7135e-05	0.000148462	9.17558e-06	5.78598e-05	1.20296e-05	0.000281465	0.000439272	0.000188838	0.000419924	3.78403e-05	0.000123562	8.55907e-05	0.000325672	0.000494718	0.000226371	4.8127e-05	8.68051e-05	0.000625179	0.00239633	1.37221e-07	0.000348978	0.000157378	4.79218e-07	8.79602e-05	6.305e-05	3.4531e-05	2.38677e-06	0.000292287	3.65271e-05
5.55717e-05	0.000184407	0.000116722	8.74764e-06	8.04473e-05	0.000139261	1.22962e-05	2.01481e-05	2.34598e-05	3.80519e-05	3.17358e-05	0.000304641	1.30677e-07	0.000403046	0.000162358	0.000214445	0	0.000391556	0.00010897	0.000102339	0.000436711	1.42299e-05	0.000224766	7.37582e-05	8.1604e-05	0.000129518	1.64168e-05	0.000199652	4.71752e-05	0.000122154	0.000240318	0.000101226	1.51336e-07	6.4455e-05	0.000210897	0.000177665	0.000324498	2.84211e-06	3.13316e-05	1.26138e-05	0.000770328	0.000776717	3.15152e-05	8.80285e-05	0.000683951	0.000130899	0.000405142	0.000983646	0.00020629	0.000363177
1.38538e-05	3.61275e-05	6.25387e-05	0.000264587	1.05358e-05	3.86038e-05	2.5809e-05	6.76627e-06	7.833e-05	1.70501e-05	9.69885e-05	0.000113763	3.37093e-09	0.000752204	0.00074795	7.0824e-06	0.000341326	0	2.80486e-05	0.000127872	0.000227354	4.22869e-07	0.000236674	0.000569551	6.29018e-05	0.00314571	0.00015536	0.000842622	1.61053e-05	0.000250131	0.00134549	1.95773e-06	2.52705e-05	0.00022805	0.00159224	8.78418e-06	4.52462e-05	9.35652e-05	0.000154211	8.32719e-05	0.000304855	6.39186e-05	0.00109256	0.000579042	0.00115173	7.6186e-05	5.6543e-07	0.000260663	0.000583855	0.000285591
0.000259282	4.33453e-05	1.26658e-05	8.68076e-06	1.47525e-05	3.80046e-05	8.64362e-06	4.54512e-06	1.53033e-05	4.74822e-05	4.84843e-05	3.76118e-05	0.000605034	2.49272e-05	0.000149163	7.57596e-05	0.000247688	9.68594e-07	0	0.000489197	0.000143838	2.13151e-05	0.00011923	0.000340427	1.28541e-05	9.21718e-05	0.000213577	0.00308627	0.000293939	6.77519e-05	5.48499e-05	0.000490079	6.22588e-08	0.000191007	0.000124471	0.000101419	0.00045365	2.94809e-05	5.78679e-09	1.10699e-05	1.58577e-05	0.000188141	0.000950627	5.51346e-05	0.000235747	0.00280934	0.000660643	8.06757e-05	1.49982e-05	9.32634e-05
2.42984e-05	0.000175378	1.13313e-05	2.3189e-05	0.000109938	0.000212967	8.28194e-05	5.72479e-05	0.000160361	0.000106509	0.000439635	0.000121451	0.000226908	0.000236937	6.70314e-06	0.000338452	0.00010865	0.000245865	0.000738803	0	1.29051e-05	0.000493284	3.95182e-07	0.00157798	0.000285723	9.42762e-05	0.000307399	0.0030206	6.55642e-05	1.81619e-05	9.31637e-05	0.000195087	9.12609e-05	0.000942566	5.07676e-05	0.00012547	6.43298e-05	0.000348848	0.000286455	0.00161394	0.000513289	0.00140196	3.02239e-05	0.0008548	0.000677718	0.000240501	0.000781441	0.00256938	0.000233833	0.000685176
9.12065e-08	1.10868e-05	1.47671e-07	5.41667e-05	4.83044e-05	7.65287e-05	0.00032978	2.07881e-05	6.65757e-05	0.000462499	0.000272914	3.13335e-05	3.47639e-07	2.74192e-06	0.000270791	2.66362e-05	0.000200906	0.000305519	0.000448246	0.000142455	0	0.00044364	0.000112455	0.000125052	0.000313206	2.8466e-05	0.000827382	0.000158323	0.000527048	0.000383696	8.34402e-05	9.02246e-05	4.58155e-05	2.72952e-07	0.000134345	0.000162396	4.11809e-05	0.000604875	4.50492e-05	1.03319e-06	0.00013193	0.000275242	0.000275172	0.00145275	1.90288e-05	0.00045089	0.000399013	8.48235e-07	0.000126116	0.000336007
2.35785e-05	1.0801e-07	2.05065e-05	4.69576e-05	3.34972e-05	2.85441e-05	0.000151601	6.9673e-05	0.000536511	5.34684e-07	1.82018e-05	0.00048646	1.10883e-07	4.25748e-05	0.000138339	0.000136641	2.40947e-05	0.000159332	9.33215e-06	0.00126452	0.000163659	0	5.79494e-08	4.33947e-05	2.00764e-05	5.64707e-05	0.000227206	0.00144241	0.000139696	1.64778e-05	0.000770627	0.000323398	0.000125096	0.00197511	0.000149103	0.000376541	0.000489097	0.000257488	1.4938e-05	0.000172446	0.000298128	0.000138094	0.000145699	2.62884e-05	1.1899e-05	0.000219031	0.000424706	0.000282333	4.01257e-08	0.000222317
1.02797e-05	0.000167256	1.33798e-05	1.07767e-07	8.01203e-05	0.000535792	7.5462e-05	0.000780078	0.000148264	2.19608e-05	5.53611e-05	3.10955e-06	2.86914e-05	2.0567e-05	0.00100364	0.000317407	0.000161452	9.35828e-05	0.000132978	7.70483e-05	1.35415e-06	0.000124994	0	0.00120104	2.6717e-05	3.69544e-05	5.30794e-06	1.61688e-05	0.000567124	2.34362e-06	0.000515386	4.08238e-05	2.1355e-05	4.09893e-05	0.000833076	0.000211174	3.42682e-05	0.000319941	7.10466e-05	0.000629286	0.000181243	3.75439e-05	0.00062524	0.000420167	0.00215069	0.000590599	2.39981e-05	3.7092e-05	0.000965248	5.67315e-05
8.1209e-07	0.000182958	2.48817e-05	0.000109176	4.67143e-05	0.000396715	4.09415e-05	0.000544873	0.000409856	7.96008e-06	0.000659191	6.47114e-05	3.60528e-05	0.000311921	8.00225e-05	5.17329e-05	2.43199e-06	0.000272539	0.000711197	0.000655826	0.000107711	1.03672e-05	0.00118295	0	3.33749e-06	2.06133e-05	5.42871e-05	0.00117022	9.05892e-05	0.000299322	0.000593749	2.46446e-09	2.37101e-05	9.62005e-05	0.000104029	1.95681e-06	0.00130282	0.000399215	0.000676671	1.73931e-05	0.000453239	0.000246226	0.000221586	0.00137009	0.00238082	0.000546822	0.000612014	0.000660649	0.000638651	4.3709e-05
0.00027687	3.29486e-05	8.63492e-06	1.90649e-05	6.99716e-05	0.000264772	9.67774e-05	7.08673e-05	2.81882e-08	0.000379861	8.15514e-05	0.000248561	0.000304818	2.46082e-06	0.000155564	9.10658e-06	0.000146609	2.28557e-07	1.49665e-06	3.80785e-05	0.000487885	5.09047e-05	2.52718e-05	0.0001009	0	0.00029946	1.88027e-05	8.74922e-05	3.72112e-08	0.000192123	4.20816e-05	0.000282211	9.98732e-05	7.63551e-05	0.000193274	0.000218407	3.21415e-05	0.00052704	1.0606e-05	4.46177e-05	0.00071793	8.46558e-05	8.44897e-05	0.00014245	3.23565e-06	0.000217837	2.39606e-05	5.45615e-06	0.000680848	0.001237
0.000403789	5.24032e-05	6.03973e-06	0.000124372	8.24945e-07	9.06502e-06	1.33856e-05	0.000187412	0.000142581	1.68138e-05	3.21439e-07	9.20332e-05	5.54541e-06	0.000163092	0.000199989	0.000593325	9.92204e-05	0.00138028	4.77873e-06	6.50116e-06	4.04633e-05	3.08112e-06	3.57183e-05	6.55993e-05	3.75016e-08	0	8.03693e-05	2.09052e-06	2.23055e-05	0.000554979	1.21629e-05	5.08167e-05	3.1738e-05	0.000141822	0.000117505	0.000101792	0.00298913	1.5923e-09	0.000526306	0.00119626	3.86748e-06	5.84407e-06	0.00229418	0.00240252	2.24068e-06	0.00039325	0.000978468	0.00108711	1.50701e-05	4.94122e-06
4.75444e-05	4.85924e-08	5.03688e-05	6.7493e-05	0.000126778	2.40526e-05	8.81869e-05	0.000650515	0.000700987	0.000269315	8.4588e-07	6.40585e-05	0.000512178	5.40403e-05	2.10597e-07	0.000679269	6.18447e-06	0.000337433	0.0004783	0.00180883	0.000956328	0.000258137	0.000179674	0.000263204	0.000105846	0.000660315	0	0.000566328	0.00037689	0.00124045	0.000590406	0.000553246	2.21547e-05	0.000514581	5.39132e-05	7.36484e-05	0.000592606	0.000147245	3.57671e-05	0.000808324	3.00506e-05	0.00152944	0.000423059	0.00225319	0.00035372	0.000158171	0.000995297	0.00129641	0.000187377	0.00105501
0.000108325	3.50938e-05	0.000122739	7.63099e-05	6.23837e-05	0.000183171	0.000185623	2.51732e-05	0.000277053	5.35109e-05	0.00136493	3.31813e-06	0.000648366	7.28227e-05	8.90991e-07	0.00045742	0.000790617	0.000753029	0.00313894	0.00206759	7.05326e-05	0.00189566	0.000186435	0.00112941	3.50864e-05	4.95131e-05	0.00075547	0	8.02106e-05	0.000363326	1.46886e-06	0.00258998	7.92858e-08	7.16351e-05	0.000307718	0.000588492	0.00364077	0.00267476	4.88261e-05	0.00136719	8.55308e-05	0.000921263	9.90426e-07	8.74286e-05	0.000144156	0.00310532	0.00383824	0.000741849	5.57031e-05	3.86148e-05
0.000344522	7.69443e-05	0.0001457	0.000778066	2.53337e-05	0.000102167	0.0001297	0.000373325	0.00664643	1.44331e-05	5.57366e-09	0.00103296	2.95371e-06	8.0738e-06	0.000697553	0.000481543	9.06278e-05	5.19012e-05	8.90456e-05	3.9059e-05	0.000528054	0.000395373	0.000258956	9.59874e-06	5.04091e-05	0.000190777	0.000392918	0.000121638	0	3.67074e-05	5.02398e-05	0.00135034	0.000201727	3.87677e-05	0.000685341	0.000233336	0.000136113	0.000140915	3.12769e-05	5.67228e-05	0.000342477	0.00154036	0.000464803	0.000174955	3.35478e-05	0.000230534	0.000225713	0.000409835	0.000922845	1.2228e-05
0.000198561	2.75418e-05	7.36481e-05	0.000238898	2.31688e-05	0.000260576	0.000666893	0.000131548	1.07639e-05	3.75511e-05	6.75444e-06	2.09435e-06	0.000171545	7.08297e-06	0.000419781	0.000394941	0.000118393	0.000653738	2.69688e-05	9.58557e-05	0.000485645	9.36453e-05	5.14974e-05	0.000529282	2.36213e-05	0.000493426	0.00243195	0.0005583	6.29798e-05	0	0.00142164	0.00060459	9.44313e-05	0.000166585	0.00132223	0.000131941	0.000706716	0.000552689	0.000415882	0.000381379	1.1275e-06	0.00232744	0.000714311	0.00105253	0.000613434	0.00036384	0.00256606	0.00133508	8.40155e-07	0.00056968
0.000369515	2.65932e-05	4.67906e-05	7.85047e-06	9.79423e-06	1.29277e-05	0.00015472	7.88522e-06	3.05037e-05	4.0176e-05	0.000249701	0.00021042	5.25087e-05	0.000110091	7.1043e-06	0.000344336	0.000397125	0.000515793	3.07544e-07	4.60111e-05	0.000144927	0.000374585	0.000396684	0.000377152	0.00025091	0.00024352	0.0014299	4.9202e-08	4.52934e-05	0.00117961	0	0.00038121	0.000221693	0.000754048	6.63881e-09	0.000178018	6.81866e-05	0.000334186	0.000458294	0.00273181	0.00024014	7.56824e-05	0.00437746	4.61265e-05	0.000444937	0.000972169	3.94442e-06	5.31397e-08	0.000499015	0.000509192
4.20272e-06	1.89164e-05	3.29302e-05	5.11567e-05	3.72868e-06	0.000918361	1.2085e-07	1.85896e-05	0.00050998	2.96801e-05	2.09698e-06	1.94996e-05	0.00014072	0.000182924	2.45909e-05	0.000143052	1.2361e-05	4.89493e-05	1.42624e-05	0.000192528	0.000124867	0.000490182	1.18021e-05	0.000145901	0.000335457	0.00033201	0.00031227	0.00195937	0.000663394	0.000568786	0.000200152	0	0.000331663	0.000489335	0.000119905	0.000287125	0.000663964	0.000154152	0.000453023	0.000249417	0.000154661	0.000807315	1.48478e-06	4.01592e-06	7.94717e-06	0.000140646	0.000354976	0.000396419	6.22534e-05	0.000257465
1.87249e-06	4.51503e-06	2.63479e-05	6.88416e-05	7.934e-06	3.36898e-05	0.000167204	5.06832e-06	1.29519e-07	2.93305e-05	3.84452e-05	0.000314445	7.4446e-05	3.76928e-07	1.85087e-07	1.50521e-05	4.42382e-07	5.50547e-09	8.27941e-05	6.77192e-05	2.58479e-05	5.00964e-05	2.92972e-05	4.0085e-05	2.83382e-05	4.62977e-05	5.8221e-05	2.59477e-05	7.5728e-07	6.43075e-05	4.85364e-05	0.000569058	0	0.00020923	0.000143564	0.000530073	0.00011881	3.61393e-05	0.000158195	8.70907e-05	1.04307e-05	1.3545e-08	0.000427201	7.73485e-05	0.000415204	0.000314399	5.11249e-05	0.00067108	0.000431363	5.21e-05
0.000159897	0.000195475	0.000144253	1.36525e-06	5.48994e-06	0.000178933	4.52272e-05	0.000220954	1.12186e-05	0.000378488	3.63814e-05	0.000821418	8.62439e-05	0.000607719	0.000643574	0.000708196	3.5046e-07	8.98966e-05	2.63182e-05	0.000621551	9.96514e-06	0.000789099	0.000296756	6.3784e-05	1.03447e-05	0.000461667	0.000431485	0.000513613	1.29265e-06	0.000369814	0.000156767	0.000767554	0.000307975	0	1.10976e-07	1.25513e-05	0.000357921	0.000693756	0.000106289	0.00190579	2.4931e-05	1.68221e-05	0.000709202	0.000597563	0.000361999	0.000113028	0.00064684	2.63352e-05	4.02095e-05	0.000120974
0.000193104	4.58342e-05	8.10433e-06	0.000382481	0.000123841	0.000557131	4.97986e-05	0.000325493	0.000112054	0.000397528	0.000197066	0.000901972	0.000369185	0.000385972	0.000630534	0.000286839	7.09316e-05	0.0012141	2.4003e-05	2.11472e-05	0.000147154	5.72662e-05	0.00086106	0.000118747	0.000674821	0.000859891	8.11898e-05	0.000334509	0.000989854	0.00101879	0.000339878	3.53345e-05	3.99801e-05	8.21971e-05	0	0.000657626	0.000753744	0.000202169	0.000350624	0.000151801	0.00159867	0.000723247	0.000353043	0.000405565	0.0002235	0.000317577	0.000522062	0.001148	0.00396731	0.000276481
0.00018456	2.03745e-05	0.000187438	0.000102903	0.000209076	7.65552e-06	2.19419e-05	0.00055768	1.8593e-06	6.56343e-05	1.5548e-05	0.000164968	7.96885e-05	0.000297773	0.000254175	5.66643e-05	0.000750072	0.000157664	0.000110626	9.34262e-05	7.33131e-05	0.000162704	0.000257737	0.000118642	0.00016988	4.94054e-06	6.72053e-07	0.000679454	0.0003985	6.15916e-05	8.90631e-05	0.00015977	0.000172807	4.15732e-06	0.000320922	0	3.94014e-05	4.27134e-05	0.000308541	6.7046e-05	0.000347831	0.000124174	8.31188e-05	1.47268e-08	0.000122431	0.000121062	0.000106093	0.000857413	0.00132408	0.00137976
1.44085e-05	1.72284e-06	6.50725e-05	2.20632e-05	9.75274e-07	4.30929e-05	0.000127281	0.000573929	2.55471e-06	8.55945e-06	0.00250583	2.21769e-05	7.71117e-06	8.50278e-06	0.000169751	0.000201726	0.000190347	4.28292e-05	0.000469342	3.09291e-06	6.146e-05	0.000694447	1.13378e-05	0.00072325	5.01407e-05	0.00293663	0.0003842	0.00268261	0.0001407	0.000189806	7.49416e-06	0.000872798	0.000180902	0.000276117	0.000825379	0.000248238	0	0.00239011	0.000152677	0.00111831	0.000595133	5.54542e-08	4.29544e-05	0.00315485	0.000329926	0.00299657	0.00203765	0.00103625	0.000196448	7.65182e-05
6.27426e-05	1.81085e-05	5.10575e-06	2.54574e-06	4.13777e-05	1.6365e-05	4.35884e-05	2.02612e-06	0.000385682	5.11819e-05	0.00100622	0.000341392	0.000136135	6.25871e-05	0.000558056	8.90004e-05	3.78214e-05	0.000393023	0.000126108	0.000615407	0.000718453	0.000211222	0.000205983	0.000859583	0.000513607	9.4607e-05	9.85583e-05	0.00267869	0.000420292	0.000686807	0.00015689	0.000161839	2.063e-07	0.000553915	1.37691e-05	2.36237e-06	0.00171532	0	0.000462968	0.000583227	9.35606e-05	0.00016597	2.24527e-05	0.00242577	0.00199907	0.00306249	0.000226203	0.0016567	8.97681e-05	0.000433583
3.86465e-05	0.000180439	6.65926e-06	0.000111312	0.000179205	8.87785e-06	0.000484144	0.000373036	3.10542e-05	0.000322149	0.000870015	7.06752e-05	4.76745e-05	4.47587e-05	4.54396e-05	2.35171e-05	0.000220956	0.000301244	1.67463e-06	0.000300282	0.000439261	1.27087e-06	0.000111794	0.000861022	0.000146326	0.000510917	3.49641e-05	3.76318e-07	7.14632e-07	0.00110073	0.000764372	0.000175059	0.00057802	2.01694e-05	0.000220249	0.000271285	1.82716e-05	0.000241146	0	4.87646e-05	0.00031187	0.000306463	0.000103762	6.30717e-05	7.47048e-07	0.000378762	1.07206e-05	0.000844228	0.00107259	0.000505236
0.000288226	1.11977e-06	9.56573e-06	0.000186181	0.000156844	0.000148356	5.2921e-05	1.41656e-05	0.000173104	0.000200451	9.85595e-06	0.00117989	1.97989e-05	3.36245e-05	0.000127206	0.00245782	1.36418e-05	0.000101459	3.68058e-05	0.00114503	4.92425e-05	0.000220152	0.000115191	3.25677e-06	1.00916e-06	0.000866851	0.000572145	0.000581734	4.89829e-05	0.000436087	0.00253046	5.51506e-05	0.000673768	0.00225071	4.38569e-05	0.000208174	0.000377615	0.000443712	2.47602e-07	0	0.000133401	4.24051e-05	0.00802074	0.00018996	0.000201795	0.000103483	9.55546e-05	0.00100753	0.000529518	0.000189088
7.37604e-05	8.35876e-05	9.23856e-05	6.53757e-06	0.000101705	0.000216573	0.000636252	0.000330396	0.000588549	6.25289e-05	0.000199794	0.000280683	0.000333897	0.000425721	5.83857e-06	2.4679e-06	0.00118131	0.000443521	4.19509e-07	0.00041381	0.000154685	0.00013411	0.000302484	0.000136094	0.000157678	0.000147728	6.21785e-05	0.000260657	0.00116352	0.000486709	0.000541793	8.6063e-06	3.63375e-05	1.02322e-05	0.000946084	0.000836701	0.000281013	6.62525e-05	0.000209513	0.00144348	0	0.00110288	0.000165254	0.00167862	0.000448811	3.89629e-05	0.000451914	0.00190194	0.00134034	0.000677465
0.000387829	4.22011e-07	8.08009e-05	0.000359506	4.39676e-07	6.6994e-05	3.29909e-08	4.022e-05	0.000786095	3.06581e-06	5.66243e-05	0.000121065	0.000654964	0.000372737	1.81155e-06	0.00020587	0.000931014	4.21746e-06	9.39925e-05	0.000441539	0.000124279	0.000177149	0.000208303	0.000100829	0.000446076	0.000207707	0.000807179	0.000471528	0.00220578	0.00171457	7.17258e-05	0.000870536	0.000506782	3.29266e-08	0.000770321	6.76235e-05	2.26891e-06	0.000585947	0.000173649	5.01654e-05	0.000720916	0	0.00358305	7.94525e-05	3.62877e-06	0.000373337	0.000108971	0.00516585	0.000578718	0.000412575
0.000359351	3.25362e-05	3.9744e-07	6.42474e-05	3.5547e-05	7.00038e-05	6.62672e-05	0.000398357	0.00105538	3.47944e-05	0.000166378	6.25013e-05	4.85879e-05	7.20986e-06	0.000125818	9.37902e-05	1.22358e-05	0.00111269	0.00015985	0.000120884	0.000532691	6.35642e-05	7.23827e-05	0.000108039	0.000338888	0.00153665	0.000749116	8.00472e-06	0.000599768	0.000252554	0.0033053	3.53886e-07	0.000239423	0.000392924	0.000207003	0.00016481	0.000153706	3.59891e-06	6.29016e-05	0.00713642	0.000143901	0.00146299	0	0.00134048	3.01756e-05	0.0010453	0.000431622	0.000789306	0.00117813	0.00166055
2.79086e-06	3.48608e-06	1.28037e-06	0.000282688	5.01275e-06	4.14211e-05	0.000208155	0.000275795	0.00124453	0.000534091	0.00238705	0.000687773	7.7805e-05	0.000451529	2.68083e-05	7.09543e-05	0.000150769	0.000500178	6.64587e-05	0.000404074	0.00166786	4.25749e-05	0.000553854	0.00275986	0.000156373	0.00168945	0.00138842	4.69099e-05	0.000461771	0.000821857	3.20772e-06	2.08631e-05	1.02467e-05	0.000438483	0.000237907	2.26424e-05	0.00254131	0.00264445	0.000221755	0.000519221	0.000931478	0.000466951	0.000610054	0	0.00234668	0.00288538	0.000760713	0.000212426	0.000160083	0.000991256
3.44479e-05	4.43893e-05	5.62835e-07	0.000417693	0.000288075	4.39188e-10	2.05253e-05	0.000289427	0.000259874	8.02446e-05	7.38842e-05	1.97685e-05	2.31618e-05	0.000181177	0.000715479	7.28878e-05	0.000260052	0.000973044	0.000342947	0.000202116	6.59271e-05	0.000214308	0.00114795	0.00253188	9.06726e-05	0.000265062	2.28457e-05	0.00018944	7.53976e-06	0.000283207	0.000648821	0.000105383	4.89767e-05	0.000487136	0.000325569	8.4573e-05	1.74147e-05	0.000797069	0.00016374	0.000304554	0.000292179	7.10071e-05	0.000244546	0.00150348	0	0.00144489	1.15216e-06	0.000188137	1.24127e-05	9.15563e-05
4.55772e-05	9.80121e-05	0.000346796	0.000721905	0.000110992	9.62763e-05	0.000153928	0.000331394	0.00059505	0.000735649	0.000870932	9.18781e-05	0.000327195	0.000100335	1.03177e-05	1.83865e-06	0.000366331	6.97761e-05	0.00270952	6.55526e-05	0.000240912	9.10724e-05	0.000712077	0.000791565	0.000165265	0.000146572	7.80492e-05	0.00162407	7.16425e-06	0.000508309	0.000810933	0.00056963	0.000119359	0.00022051	0.000195288	4.37989e-05	0.00309869	0.00183503	0.000239334	2.02028e-06	2.212e-05	0.000426048	0.000991683	0.00216959	0.00148241	0	0.00230242	0.000515067	0.000543122	0.000256155
0.00016215	3.11783e-05	8.70523e-05	0.000882411	4.3365e-05	4.55241e-09	0.000149022	0.000110244	8.11928e-05	1.21622e-05	0.00027972	2.01921e-05	0.000146039	1.79941e-05	5.00835e-06	3.60059e-05	0.000593233	3.13664e-05	0.000540476	0.000866487	0.000229201	0.000362345	6.2131e-05	0.00102849	0.000106358	0.00112839	0.00082813	0.00452768	0.000495057	0.00270422	1.23829e-05	4.48406e-05	1.46613e-05	0.000533505	0.000828875	1.07332e-05	0.00176505	0.00020402	1.77257e-06	0.000949485	0.000401182	6.66314e-05	0.000473982	0.00101979	0.000334147	0.00242336	0	5.66117e-05	9.30045e-05	0.000205351
1.74602e-05	1.9937e-05	7.64736e-05	0.000309775	8.48298e-07	8.72619e-06	0.000163775	3.73302e-05	0.00144786	1.42136e-06	0.000772988	0.000171381	0.000189826	0.000109816	0.000362791	2.63978e-05	0.0003279	0.000255232	0.000117624	0.00102653	9.40217e-05	0.000112737	2.28779e-06	0.00116697	1.14504e-05	0.00234918	0.00158842	0.000990645	0.00115079	0.00215457	4.27251e-06	0.000297566	5.73223e-05	4.89736e-06	0.0017488	0.000743605	0.000714107	0.00241492	0.00141516	0.000403335	0.00086588	0.00423106	0.00135293	0.000133484	0.000298978	0.000182878	0.000241546	0	0.000237374	0.00014446
7.29766e-06	0.000191753	0.000181409	7.64152e-05	8.57336e-05	5.02828e-06	3.77999e-06	0.000402336	0.000140909	0.000360035	0.000122653	0.000347956	0.000258066	0.000895548	0.000134823	0.000141471	4.12397e-05	0.000339352	9.44945e-06	8.8076e-05	0.000164572	1.3748e-07	0.000989995	4.43078e-05	0.000463598	4.95128e-05	0.000154068	7.64592e-06	0.00132131	8.56488e-05	0.000811174	0.000448435	0.000439281	0.000250991	0.00276761	0.00216318	0.00085718	0.000143253	0.000483261	0.000518432	0.000631781	0.000490584	0.000794522	9.44653e-06	0.000220984	0.000723901	3.74385e-06	0.000206211	0	0.00137252
0.000242168	2.70982e-05	4.33353e-05	4.16873e-05	0.00027208	8.75534e-05	6.99301e-07	0.000143812	0.000255579	8.05503e-05	9.20834e-06	0.0010178	2.20064e-05	5.92216e-06	0.00011703	1.04918e-05	0.000799262	5.4597e-05	0.000165856	0.000942746	0.000288894	0.000367862	7.30806e-06	0.000111332	0.000867527	1.51097e-05	0.00092697	6.00377e-07	2.46513e-05	0.000249952	0.000159548	0.000210657	0.000193863	1.37679e-05	0.00035254	0.00187833	1.7915e-05	0.000266328	0.000268525	0.000198907	0.00108206	0.000169285	0.00112667	0.000526418	0.000519331	0.000577602	0.000286629	0.000124277	0.00145754	0
0.000142276	0.000185025	2.93736e-05	1.72425e-05	0.00033147	0.000478443	0.00014452	5.40458e-05	5.28589e-05	1.15141e-06	6.82593e-06	0.000561836	0.000557937	1.38608e-07	0.000250824	0.000415819	9.01012e-05	2.65292e-05	5.50301e-05	0.00118615	3.03874e-05	0.00160435	0.000609201	7.93915e-05	0.000237238	0.000926158	0.000165648	0.0008037	0.00190131	0.00113953	8.74085e-06	0.00322676	0.00109617	0.00182568	4.70512e-06	1.04352e-05	0.000903033	0.00102476	0.000625109	2.35882e-06	0.000218277	2.47265e-05	5.89865e-06	0.000419721	0.0019895	3.32059e-05	0.000969758	1.63896e-05	1.41185e-05	1.14051e-05
8.75198e-06	5.73627e-05	3.23401e-05	7.99356e-05	1.39464e-06	8.57786e-05	1.76456e-05	9.54386e-06	0.000343736	2.6521e-05	0.000186603	2.04222e-05	3.9699e-06	0.000357933	3.28609e-06	0.000376275	0.000126396	2.34046e-06	1.73651e-08	3.07303e-06	0.00453474	1.53368e-05	8.60106e-05	2.30559e-06	1.46999e-05	4.66614e-05	0.000492918	0.000769114	0.000841076	0.000125915	4.1915e-08	0.00313949	0.000131083	0.00163848	0.000109509	0.000471016	0.00137953	0.000731261	5.9935e-05	0.00260588	9.65429e-05	0.00120653	1.02361e-05	0.000564934	2.05729e-05	7.76114e-05	0.000696566	0.000242129	0.000561208	4.77373e-05
0.000115926	3.90899e-05	6.58506e-05	0.000193409	2.7081e-05	0.000552555	2.0566e-05	4.22531e-06	5.9469e-05	0.000254	0.000181852	0.000184016	4.28537e-07	0.000412013	9.17426e-05	0.000148169	0.000796532	0.000919912	6.4461e-05	2.34107e-06	4.3777e-07	0.00017791	0.00118793	0.000269732	4.97005e-05	0.00203753	6.40364e-05	2.48428e-05	0.000139189	0.000196374	0.000943214	7.86869e-06	0.000251822	1.46913e-06	0.00197206	0.000463168	0.00146605	7.6534e-05	0.000797061	0.00219435	0.000640964	0.000193606	0.00457466	0.00266172	0.000445071	0.000429008	0.000514473	0.000554935	0.000719718	4.14753e-05
0.000260345	2.77836e-05	2.20592e-06	3.4913e-05	2.83642e-06	2.64332e-06	3.00865e-05	3.71507e-05	6.67789e-05	6.13439e-05	0.000324941	0.000278237	3.81075e-05	8.20612e-05	4.1926e-05	0.000143781	1.63112e-05	0.000408808	0.000267357	4.31439e-07	1.36328e-05	2.58124e-07	0.000589298	0.00119725	0.000440905	0.000434314	0.000565808	6.93149e-05	0.000280982	3.91061e-05	0.00134547	6.91084e-05	0.000517167	0.000555464	0.000558983	6.11443e-05	0.00050844	5.72314e-07	0.000337684	0.00299252	0.000481741	0.000796908	0.00161693	1.70436e-05	0.000705507	0.000149765	0.000271239	0.000300888	0.00091456	0.000122656
0.000587508	2.09902e-05	0.000179357	0.00012485	0.000142998	2.20941e-05	0.000381502	0.000444428	0.00041593	0.000680055	4.2146e-08	0.000260958	6.95801e-05	3.57953e-06	1.83676e-05	0.000641123	0.000242912	9.82926e-08	0.000176279	0.000265915	0.000939457	5.57538e-06	7.62862e-07	0.000137719	0.000990363	0.00240849	3.73244e-05	0.000109578	0.000151491	0.00187489	1.33901e-09	3.52459e-06	4.81239e-06	0.000932862	6.43923e-06	0.000113372	0.000753223	8.88085e-05	0.00207211	0.00227821	0.00014927	1.19951e-05	0.00038697	0.00112266	2.95494e-05	0.000155345	1.49177e-05	2.29562e-06	1.95416e-06	0.00283696
0.000731459	0.000653924	0.000891381	3.24162e-05	0.000143784	0.00063717	0.000256089	9.84253e-06	0.000704386	4.33384e-06	0.000477585	0.000184966	1.12167e-06	0.000126113	0.00136599	1.13527e-05	1.70666e-06	0.000678109	0.00238047	0.000563836	0.000298653	0.00104911	0.000335457	0.000367872	0.000478205	0.000169608	0.00112969	0.00215453	0.00147477	8.21889e-05	2.72655e-05	5.38899e-06	1.67412e-05	0.000600055	0.000131152	0.00126762	0.00102373	0.00270864	9.59935e-05	0.000893191	8.61738e-05	0.000119427	5.92385e-06	0.000914048	0.00206455	0.00239587	0.000461646	0.000163698	3.2286e-06	0.000317424
4.22753e-05	0.000604041	9.9233e-05	1.81506e-05	0.000122921	1.33853e-05	0.000129942	9.35662e-06	0.000107502	1.01657e-05	8.36761e-05	1.64502e-05	0.000262286	0.000127864	0.002367	0.000220057	0.00066294	0.000403628	0.000593314	0.000121	0.001628	0.000110737	0.000576738	0.00121987	0.000202451	0.000907641	0.000394314	0.00083236	4.60613e-05	3.33679e-06	3.88149e-07	6.58465e-05	0.00011426	0.000127106	3.0429e-07	7.45441e-05	6.33986e-05	0.00115762	0.00113771	3.53013e-05	6.25577e-06	4.96127e-05	0.000136402	0.00242208	0.00265334	0.00201311	0.000605737	0.00019602	0.00016596	0.000856653
7.59681e-05	2.18436e-06	3.21798e-05	0.000169872	0.000131316	0.00168597	0.000179032	0.000169703	0.00217986	0.000399911	6.63393e-06	0.000165247	0.000311872	0.000137071	2.56588e-05	2.02103e-07	0.000311504	0.00033792	0.000540856	0.000184574	0.00103534	0.00180706	0.000927078	0.000339791	5.15485e-05	0.000773576	0.000511179	3.41035e-05	0.000557673	0.00199242	0.00154369	0.000314675	7.57673e-05	0.000682089	0.00168986	0.000242545	0.00239619	0.00178138	0.000100694	0.00444997	0.00088	0.000254433	0.00427588	1.42485e-05	0.000221208	4.71618e-05	0.00152723	0.000472425	0.000298495	7.97858e-06
8.50052e-05	0.000160861	5.65593e-05	1.18181e-05	0.000234661	0.000468081	0.000146362	0.000929681	0.000294657	0.000307798	0.000266608	0.00078505	5.84397e-05	0.00186691	0.0021385	0.000792946	0.00228388	0.000968059	0.000132257	0.00114484	1.9502e-06	0.000771394	0.0021786	0.00314725	4.52344e-05	2.22368e-05	0.000378819	0.000667122	0.000456712	0.000263028	0.000523848	1.14125e-05	0.000169149	0.000308668	0.00357917	0.00113781	0.000636992	6.40366e-06	0.00222791	6.21265e-05	0.00563129	0.000923849	5.67014e-05	1.8108e-07	0.00135918	0.000905576	0.000440411	0.00390105	0.00206862	0.000682752
4.60288e-05	9.2081e-05	2.29951e-06	2.87932e-07	2.39716e-06	1.85451e-07	0.000169	8.42412e-05	0.000448791	0.000247071	0.000106815	9.44712e-07	0.000495647	0.000406153	0.000379358	5.48476e-05	7.03507e-05	0.00018191	0.000461364	0.000329934	0.000778875	0.000258655	0.0019871	0.00293397	2.5104e-05	0.00158762	0.00423328	0.00074433	0.000489374	0.000480398	0.0010582	0.000252234	2.29397e-05	1.39313e-06	0.000760747	7.47678e-05	1.0358e-07	0.000452288	4.78272e-06	0.00196531	1.0962e-05	0.00394697	0.00032049	0.00264364	0.00262837	0.00191643	0.000419308	0.00136757	0.000922343	2.81346e-06
9.23934e-06	0.000147363	0.000141414	0.000194181	4.25329e-05	7.07678e-05	1.95165e-06	0.000220708	4.07259e-05	0.000148062	1.49649e-08	0.00016484	0.000581631	2.76965e-06	0.00309461	8.0235e-05	5.80485e-05	4.09531e-06	0.000162373	0.000201393	4.69555e-06	0.000413823	1.48632e-05	0.000110596	0.000106814	4.44982e-06	1.88059e-05	0.000337348	0.000281077	0.000268646	0.000635138	0.000150931	0.00106932	0.000366313	5.85845e-05	0.00100756	0.000330259	4.7087e-05	0.000243694	0.000845862	0.00106115	0.000514367	0.000332288	0.000120256	7.10958e-05	9.88119e-08	1.77284e-06	0.000385331	0.000875367	0.00180026
0.000607129	2.32274e-05	0.000249155	1.54009e-06	8.98637e-06	0.000277232	0.000321087	4.5476e-06	8.66062e-06	0.00274034	0.00012314	5.95021e-05	0.000115503	2.22819e-05	0.000360895	1.78579e-05	0.000546989	4.18797e-07	0.00118494	0.000205699	0.000874344	4.50812e-05	5.38668e-05	0.000492827	0.000586197	5.86176e-05	0.000181677	0.000852207	0.000203243	1.09096e-05	0.000258645	0.000262844	0.000180643	0.000272864	0.000585877	3.8439e-05	0.000399843	0.000511301	8.45198e-05	5.07162e-05	0.000155287	2.67486e-05	9.92221e-05	0.000628092	0.00157275	0.0016155	0.00133319	0.000255576	0.000820485	0.00140461
1.30555e-06	0.000142682	6.40782e-05	3.09552e-05	8.28547e-06	3.63673e-06	6.94461e-06	4.84656e-08	1.44653e-05	1.41948e-05	1.94254e-05	1.17378e-05	0.000449765	2.25711e-06	0.000681683	0.000392169	0.000327425	6.58139e-05	5.77198e-07	0.000367275	0.00161065	0.000862819	5.08122e-06	0.000221411	0.000519008	0.000154283	4.96785e-06	7.76927e-05	4.77395e-06	0.000965883	0.000914968	0.00255231	0.000406168	0.000738575	8.72402e-05	0.00125059	3.62743e-05	0.000400335	0.000232537	0.00213329	0.0012338	0.000624817	0.00115662	0.000210201	2.74478e-06	1.35235e-05	5.1908e-05	0.000218114	0.000642254	0.00233443
0.000113111	9.69254e-05	2.65843e-06	0.000147664	5.81534e-06	4.52808e-05	4.53894e-05	1.09713e-05	0.00014065	0.00107905	8.96167e-06	0.000108345	0.000347096	0.000372501	6.29844e-05	7.70152e-05	8.80581e-05	6.87905e-05	1.84869e-05	2.97474e-05	0.000259406	1.05247e-05	4.55534e-05	2.94017e-05	0.000135326	0.000217342	2.25222e-05	9.9011e-05	0.000249505	0.000308364	0.000101429	0.00155737	0.000458519	0.000796594	0.000138619	9.89256e-05	8.17477e-06	5.26325e-05	0.000673377	0.000264952	0.000265128	0.00014529	8.53674e-05	1.07655e-05	0.000247682	1.84294e-06	4.82264e-05	0.000284249	0.00101789	0.000994987
7.04479e-05	1.47319e-05	1.14725e-05	4.08027e-06	9.57193e-05	0.00045163	0.000319295	0.000554194	0.00106289	9.78743e-06	4.87919e-05	3.33674e-06	0.000428494	0.000810159	0.000573941	0.000627006	0.000307669	0.000450669	0.000734001	0.0014365	0.000563892	7.37407e-05	0.00115939	0.00108945	0.000209801	0.000848272	0.0027457	4.93294e-05	2.75335e-06	0.00552032	0.00015477	0.000155876	4.11915e-05	0.000172057	0.00213346	0.000307819	8.48881e-05	7.33909e-05	4.19052e-05	0.000620338	0.000479984	0.00337856	5.70008e-06	0.000886726	0.00155236	0.000541724	0.000569019	0.00434497	0.000445417	0.00114692
0.000673934	4.99933e-05	1.06816e-05	8.76801e-06	0.000188275	5.82198e-05	5.36274e-05	0.000225039	0.0011988	0.000109846	0.000333072	0.000442739	0.000469981	3.37196e-05	4.56899e-06	9.95498e-07	0.00111406	4.31212e-06	0.000238372	7.27015e-05	6.19902e-06	0.000168493	3.82588e-05	1.70324e-06	0.000813396	0.000184895	0.00143093	2.14881e-05	0.00120528	1.15992e-07	0.000278985	0.00161041	2.82152e-05	1.05348e-06	0.000518934	0.00088728	4.55284e-06	2.52922e-06	0.00109592	3.65319e-06	0.00123102	0.00332541	0.00247378	0.00119994	0.000142342	0.000559837	9.51055e-06	0.00183346	0.000776864	0.00140086
1.98499e-05	2.56246e-05	0.000294372	6.4832e-05	1.97341e-06	1.78837e-05	0.000168702	2.76512e-05	1.77963e-05	0.00029119	1.89807e-05	0.000153965	1.51252e-05	2.62766e-05	8.43775e-05	0.000215351	2.43857e-06	3.31723e-05	1.03172e-05	1.0162e-06	0.000197743	3.68744e-05	1.92223e-05	6.59894e-07	0.000370893	0.000540366	0.000148826	3.63023e-05	0.000114524	1.89884e-07	0.000615769	0.000160156	0.000647199	6.67965e-05	0.000155737	0.000716231	0.000186361	2.60819e-06	0.000270011	0.000140862	0.000399548	9.75967e-07	0.000584501	5.13506e-05	5.18582e-06	1.96687e-07	0.000370585	0.000279534	0.000280647	0.00030463
0.000340771	1.20864e-05	0.000356775	3.20231e-06	0.000454068	0.000365722	0.000541405	0.000109599	8.41033e-05	0.000405161	0.000808488	0.000379941	8.90723e-06	9.60227e-05	7.06226e-05	0.000366236	0.000283936	1.59387e-05	0.000539194	5.56944e-05	0.000429992	0.00215701	1.93747e-06	0.000903747	0.000582315	0.000369706	0.00144682	0.00669226	0.00064905	0.000259292	0.000112925	0.000383814	2.54704e-07	0.000256238	0.000874024	0.000831406	0.00212118	0.00567352	0.000192309	0.000915803	0.000260356	3.12611e-05	2.84573e-06	0.00130264	0.000350354	0.00319752	0.00209362	3.43719e-05	0.000191369	0.00329877
8.75727e-05	9.22559e-06	4.0933e-06	9.41712e-05	9.52381e-05	9.752e-08	0.000548169	0.00133815	0.0011957	0.000486788	0.000798437	8.7005e-06	0.000165191	1.51266e-08	0.00104032	0.000274257	6.11865e-05	0.000296067	0.000663102	0.00139875	0.000640846	0.000160864	0.00206618	0.00285534	2.35391e-05	0.00264941	0.00107398	0.00175748	0.000164556	0.000498688	4.48121e-05	4.85725e-06	0.000165633	0.00089831	0.000866414	2.50176e-05	6.88669e-05	2.93663e-05	0.000432105	7.46491e-05	0.000129238	0.00126549	0.00158592	0.00172619	0.00329269	0.00221814	0.000418202	0.00192921	1.05867e-08	0.000569597
0.000480072	0.000158958	0.000319292	3.65178e-05	0.000294827	0.000506664	1.17666e-06	0.000487349	5.31507e-06	0.000215051	0.000144073	6.24534e-05	1.48067e-05	0.000314133	0.000244843	3.29465e-05	0.000547163	8.5458e-06	0.000530862	0.000151788	0.00044872	3.57239e-05	2.53075e-05	5.04112e-05	6.29606e-05	9.02082e-05	3.10856e-06	0.000240759	0.000193179	8.8173e-06	7.99344e-05	0.000421845	0.000543978	1.14387e-05	0.000721081	0.00618334	0.000221577	2.07855e-06	0.000376614	2.26472e-05	0.00123177	0.000777512	0.000103417	1.13541e-05	0.0002406	4.1502e-05	0.000128872	0.000643899	0.00203814	0.00175825
9.36827e-05	6.18676e-07	6.41248e-05	8.0309e-05	8.7822e-05	2.07969e-05	2.81275e-05	0.000302059	9.57213e-05	0.000318454	0.000311548	0.000397682	2.62304e-05	0.000227965	4.09073e-05	0.000276216	0.00226113	0.0005646	0.000144932	0.000858602	0.000220188	0.000721531	2.56815e-06	0.000179206	0.000359273	0.0001571	0.000425582	0.000406399	0.000183168	0.000400127	0.000167698	0.000737207	0.000778367	0.000248655	0.00137357	0.00210221	0.000148732	0.00128364	0.000540778	0.000110306	0.000912467	0.00258869	3.43328e-05	0.000212554	0.000128004	0.000996269	4.82948e-05	0.00167259	0.00190217	0.00114375
1.66043e-07	2.48863e-06	6.51711e-05	6.06983e-08	0.000102876	1.90124e-06	0.000199281	0.000681658	0.00174537	0.000179769	0.00210899	0.000534415	0.000274533	0.000982586	0.000213562	0.00152941	5.99689e-06	0.00102244	0.000662582	0.00303949	0.00125479	1.03803e-05	0.00202166	0.00386223	1.23427e-05	0.000138892	0.00391443	0.00234455	0.000307218	0.00210336	8.70604e-05	3.17026e-06	0.000330513	0.000432865	0.00106224	1.18436e-07	0.001117	5.80851e-05	7.2033e-05	0.000606421	0.000450802	0.0113881	0.000604407	0.00130473	0.00166802	0.00091107	0.00384131	0.00289889	0.000820134	2.46061e-05
3.63427e-07	3.87614e-05	0.0001705	0.000119862	8.52527e-06	4.08733e-05	0.00017979	5.434e-05	0.000222893	8.91798e-05	0.00018912	6.22602e-06	0.000248787	0.000252811	8.3534e-05	0.000419511	0.000480197	0.00127143	1.31184e-05	0.000343846	0.000182625	1.00247e-06	0.000159844	0.00011109	0.00083848	0.00185841	0.000119904	9.11862e-06	0.000267361	2.96406e-05	0.00174698	0.00153225	0.00129952	0.00167987	0.00127491	0.000967822	0.000997146	0.000921815	0.00151437	0.00353714	0.00078953	0.00185341	0.0029589	0.00149421	8.83349e-05	6.67494e-07	0.00064817	0.00299266	0.00159411	0.000458164
0.000105555	3.42633e-05	7.16879e-05	0.000405514	0.000125226	0.000126899	0.000182959	0.000478197	0.000703606	0.000487159	0.00143451	0.0005317	3.57516e-05	0.000478851	7.88608e-05	0.000145287	0.00163884	0.000516515	0.000259298	0.000475377	0.000247805	0.000310753	0.000472398	1.82015e-05	0.000114363	0.000841911	0.000562013	1.29704e-05	0.000945564	0.000561333	0.000373408	0.000456268	3.44747e-05	0.000519745	0.00528893	0.0020228	0.00345232	0.000935022	0.00117573	1.69378e-05	0.00257616	0.0019613	1.51713e-06	0.00235751	5.75143e-05	0.00372383	7.65037e-05	0.00711407	0.00175698	0.00073375
1.03942e-07	1.5653e-06	0.000169016	0.00012322	0.000502005	1.96202e-05	0.00036549	0.000164755	2.84118e-05	5.73019e-05	1.07051e-06	5.8695e-05	0.000321683	0.000557124	1.44995e-05	3.97345e-05	0.000911135	0.00103629	1.83492e-06	0.000325643	0.000643992	7.86343e-05	0.000117863	0.00179395	0.000799044	0.000187855	0.00064291	3.9007e-05	7.25088e-05	0.00171268	0.00123941	0.000783862	0.000240335	6.60813e-05	0.000392014	0.00142149	0.000150488	0.000420493	0.00243683	0.000169854	0.00120438	0.00119749	0.000829891	6.72078e-05	0.000173407	2.59856e-05	0.000116024	0.00078302	0.00204722	0.00202263
0.000508336	2.31118e-05	5.97817e-05	0.00022196	7.11048e-05	4.47757e-05	0.00022882	0.00021937	2.46684e-05	0.000679206	7.84953e-05	0.000114854	5.95882e-05	9.23152e-06	8.22201e-06	0.000911041	4.86686e-05	3.67223e-06	0.000581222	0.00150687	3.80851e-05	0.000162289	9.89873e-05	0.00250921	0.000132434	0.000786738	0.000708616	0.000408049	0.00109233	0.000812907	4.83432e-06	9.53179e-05	0.000476743	0.00128516	0.000288914	0.000394237	0.00139063	0.000925629	0.000141308	0.000411406	0.00122145	2.96524e-06	8.40654e-05	0.00272956	0.00118001	0.00310116	0.00384402	8.07475e-09	0.000326096	0.00091871
9.82182e-08	0.000369839	3.38335e-05	0.000156482	9.26944e-05	8.67615e-06	0.000249517	0.000207847	5.40351e-05	1.14938e-07	3.79028e-06	5.74058e-06	4.21438e-06	2.74169e-05	0.000252601	0.000210699	0.000651216	0.000718046	5.33706e-05	8.14976e-05	0.000114349	1.55594e-07	0.000701721	0.000238116	0.00020224	0.000332539	0.000311131	4.54834e-05	5.52635e-05	0.00152504	0.00151483	8.67085e-05	0.00112265	0.000208065	4.86824e-05	0.000947563	0.00016768	2.27298e-05	0.00087193	0.000571476	0.000753689	7.33055e-05	0.00184629	1.05951e-05	0.000612304	0.000709753	7.06813e-05	0.000200878	0.000846965	0.000151992
5.90071e-05	1.68577e-05	0.000104759	0.000155926	5.67119e-05	0.000698331	0.000973138	2.21956e-06	1.04057e-05	0.000652501	0.000188898	1.08827e-07	1.07601e-09	0.000170083	0.000935392	0.00106574	5.75072e-05	0.000133394	0.000216067	0.000687857	0.000326175	0.00061919	4.40141e-09	0.00111867	0.00130574	0.00100962	0.0023678	0.00120728	0.000338318	0.00600222	0.000966407	0.00128657	0.00343439	0.000815959	0.000519272	0.00113515	0.000127989	0.000816351	0.000100228	0.00301482	0.00042353	0.000163417	0.00145029	0.000144107	0.00121878	0.000118818	0.000529252	0.00207072	0.000992534	0.00233311
0.000768602	2.96741e-05	2.64066e-07	8.11012e-05	0.000450701	4.56503e-05	0.000234883	0.000584152	0.000161918	0.000178407	0.000525985	0.00024452	0.000359193	0.000818457	2.12386e-05	1.3798e-05	0.0018006	0.000865644	6.19175e-06	0.000188407	0.000249408	0.000305123	0.000553746	0.000400406	0.00238267	0.000538966	0.000298509	0.000151902	0.000313997	0.000602761	0.00150331	0.000710334	0.000128995	0.00109572	0.00464669	0.00163371	0.0010983	0.00172492	0.00160376	0.00194834	0.00399221	0.00302294	0.00239711	0.00258716	9.79029e-05	0.0012594	0.00227138	0.00296165	0.00294044	0.00156099
0.000217743	2.69636e-05	0.000432957	0.000151796	0.000405843	2.74621e-05	4.04855e-05	4.13425e-05	2.20512e-07	0.000709151	0.000177803	3.53543e-05	4.61271e-05	9.82986e-09	0.000170775	0.000229057	0.000352694	0.000421673	0.0010045	0.000129908	0.00106441	0.000139793	0.0003059	0.000268223	0.00106769	0.000264089	0.000204964	7.13738e-05	2.08602e-05	5.84227e-07	1.96347e-05	0.000975861	0.000124137	0.000747319	0.000219015	0.00146145	1.81354e-05	0.00144413	0.00143984	3.37076e-06	0.00053592	0.00204926	0.000277718	0.00158182	0.000417187	0.00254528	0.000120613	0.00125378	0.000920744	0.0034397
0.000372747	2.94803e-05	0.00049054	0.000244629	0.000438373	6.64865e-07	2.70593e-05	9.0864e-05	0.000649269	0.000357991	0.0013277	0.000863956	4.78752e-05	0.000457546	0.000964554	0.000145127	0.000397895	0.000635588	0.000806753	0.00389419	0.00272871	0.0004102	0.000523536	0.00781925	0.00157235	0.000275596	0.00178735	0.00263296	0.000230932	0.00130709	0.00039107	0.000233923	0.000398854	0.000143539	0.00155867	0.000446787	0.00423837	0.00680353	0.0009242	0.00026988	0.000465254	0.000224334	0.000109871	0.00515304	0.00688204	0.00850322	0.00302674	3.81213e-05	0.000207643	0.00381742
0.000586813	0.000346288	0.000271383	3.61037e-05	0.000339236	0.00053292	0.000144459	0.000641889	1.95855e-05	0.000939285	1.57817e-08	0.00045021	0.00118942	3.18263e-05	0.000105796	0.000181065	0.00303148	8.89404e-05	0.000114609	0.00134971	6.32202e-06	0.00257337	0.000133667	1.0111e-05	0.00249516	9.07625e-05	0.000561265	4.58352e-05	0.00432107	8.69561e-05	0.00112271	0.00269324	0.00108084	0.000664256	0.00104633	0.00516675	0.000153131	0.00153288	0.000873027	0.00281274	0.00571802	0.00393661	0.000331925	0.000215288	4.43459e-06	0.000119145	0.00038295	0.000869988	0.00791243	0.00377432
0.000648298	6.0378e-05	0.000384484	0.000119041	0.00123246	0.000399405	0.0011871	0.000222527	1.22416e-05	0.00240733	0.000324022	0.000458443	0.000569767	0.000212273	0.00074132	0.000676222	0.000202849	0.000201141	0.000629841	0.0021688	0.0003419	0.0184941	2.72208e-05	0.000250105	0.00113735	0.00024437	0.000205075	0.00208607	0.00142017	3.33012e-05	7.51087e-05	0.00105389	0.000236161	0.000116204	0.00133285	0.00378958	0.000480422	0.00427286	0.00210584	8.92819e-05	0.00123232	0.00151839	0.000150328	0.00248634	0.00246294	0.00497726	0.00188812	2.94399e-05	0.0013405	0.0028857
0.000238593	7.30856e-07	9.13829e-05	0.000524553	0.000310143	2.04229e-05	0.00118409	0.000209865	4.68689e-05	0.000567384	0.000615544	0.000392896	0.000429694	0.000488739	6.57278e-06	0.000330183	0.000471868	0.000561248	6.60828e-05	0.000708005	0.000614812	0.000194229	0.000403292	4.25074e-05	0.00267731	0.000360253	0.000106214	0.000120997	0.000399462	0.000494696	0.00282298	0.00170081	0.00170871	0.00099019	0.00543004	0.00419798	0.00152092	0.00184384	0.00555517	0.00305576	0.00421328	0.00261399	0.00553165	0.00229575	0.000338258	0.00139492	0.000394501	0.00272556	0.00583731	0.00545129
0.00152998	5.70679e-05	0.000877685	0.000814923	0.000898337	0.000106558	0.000540613	0.000700088	0.00117105	0.0028022	0.00154448	0.0017331	0.00014235	8.55739e-05	0.000565991	0.00159971	0.00132501	3.44471e-05	0.000681818	0.000403483	0.0017825	0.000978198	2.32657e-05	0.00110247	0.00273576	0.000356647	0.000133536	0.0011632	0.00683518	2.19157e-05	4.58193e-05	0.000356027	0.000392895	0.00145059	0.00245242	0.00250719	0.000881686	0.00356279	0.000844863	2.34341e-05	0.00274812	0.00126638	0.00109659	0.00149485	0.00232181	0.00637196	0.0011708	0.000943369	0.00426989	0.00696045
0.00195244	4.81533e-05	0.000482481	0.000788599	0.000345585	0.0016597	0.000704509	3.26151e-05	0.000101836	0.00158436	0.000668849	0.0017292	0.000186016	6.51739e-06	0.000134996	2.66799e-05	0.0010001	2.01002e-05	0.000823103	3.53312e-05	0.0002088	0.00210019	8.07177e-05	0.00190619	0.00170089	0.000257159	0.000186651	0.00181401	0.00858451	0.000888375	0.000335896	0.000494064	0.00074726	0.000892052	0.00147035	0.00588377	0.000985059	0.00112936	0.000470269	0.00105857	0.0032391	0.00129416	0.000399113	0.00418226	0.00215839	0.00540481	0.00588444	0.00103944	0.00219716	0.00587224
0.000117171	1.03234e-05	0.000607368	0.000117843	0.000633995	1.34792e-05	0.00106755	1.47886e-05	0.000513195	0.000458428	0.000441762	4.45944e-05	3.07747e-05	7.28437e-05	0.000909908	0.000661863	0.000224589	0.00014294	0.0010333	0.000734402	0.00203536	6.65926e-06	5.66493e-06	2.55708e-06	0.00325582	3.01124e-06	0.000924381	0.000557499	2.37707e-05	0.000492643	0.00286418	0.000532024	0.00163915	0.00290378	0.000683915	0.000769182	0.000712911	0.00121404	0.00782297	0.00286337	0.00351718	0.00108034	0.00258909	0.00129756	0.0014327	0.0017061	0.00165578	0.000726737	0.00454937	0.00601381
0.00040668	0.000150648	6.18089e-05	3.47236e-05	0.000148324	0.00022756	0.000262455	4.26291e-05	6.16594e-07	0.000178325	0.000996138	0.00132562	1.21476e-05	1.02152e-05	0.00162663	0.00137961	0.000253538	2.66678e-05	0.000743719	5.80314e-09	0.00154461	1.80771e-05	0.00198673	0.000350304	0.000152449	0.000620314	0.0012586	5.21658e-05	0.00302633	0.0021861	7.56174e-05	0.00199109	0.00157699	0.00305844	3.1179e-05	0.000404015	2.71567e-07	0.00234147	0.00392158	2.47085e-05	1.33487e-06	0.00129747	0.00433769	0.000297835	0.00262698	0.00562402	0.000224001	0.00211422	2.72666e-05	0.000324953
0.00027878	8.38055e-07	0.000401119	4.26011e-08	0.00046805	0.000314362	0.000511042	9.87195e-05	8.6006e-06	0.00161359	0.000786844	0.000426588	8.36338e-05	1.53808e-05	0.00294812	0.000401595	5.15519e-07	0.000200215	0.00173522	1.1732e-05	0.000484325	0.00213084	0.00125447	0.00346898	0.00189347	0.000260369	0.00108852	0.000717198	0.000462484	0.000958233	0.000244487	0.00105203	0.000627835	0.00142151	3.94299e-05	0.00288546	0.000402129	0.00601405	0.00109332	0.000407998	0.00176631	1.90078e-05	0.000317255	0.00349262	0.00800597	0.00359753	0.000897436	8.58618e-07	0.000792002	0.00719052
0.000131194	1.50889e-06	0.000133206	0.000427533	6.78407e-06	0.000165019	9.28224e-05	0.000155193	7.62154e-06	4.91665e-07	0.000201239	2.05046e-05	2.20071e-05	3.08116e-05	3.73334e-05	0.000134212	2.03435e-06	1.05691e-05	0.000295272	0.000119518	8.71529e-07	1.35065e-06	1.71084e-05	3.33556e-05	7.34171e-06	1.83899e-05	6.96108e-05	6.95956e-05	0.000101494	6.61108e-05	1.30663e-05	5.98134e-05	8.27197e-05	1.52212e-07	1.22542e-05	0.000703698	4.68902e-05	0.000150763	5.92489e-06	0.00038978	7.91684e-06	1.84743e-05	2.63505e-05	0.000193885	5.37933e-06	6.07862e-06	0.000244404	4.51495e-05	6.42009e-05	0.000232238
5.17787e-06	0.000151831	2.5539e-07	0.00024635	1.58365e-05	2.89547e-06	0.00012761	7.34334e-05	2.08834e-06	0.000169386	2.78672e-05	1.46897e-05	1.98557e-05	3.43999e-05	4.7176e-05	5.96883e-05	0.000130971	1.56758e-05	2.91161e-08	0.000253029	0.000257278	4.74692e-05	0.000223105	2.47929e-05	1.28114e-06	3.62169e-05	4.67521e-05	8.55946e-06	0.000613872	3.3656e-05	0.000313679	0.00030102	5.7498e-05	5.63942e-07	5.06704e-05	1.6364e-07	0.000168259	9.6514e-06	7.17099e-05	3.88493e-05	3.18189e-05	1.83111e-05	5.50272e-05	0.00023011	5.4219e-06	0.000217466	1.39463e-05	1.16357e-08	4.05681e-06	0.000157353
0.000205	2.62766e-05	0.000273218	0.000309703	8.29814e-06	4.67185e-05	1.5099e-07	4.50315e-06	3.75488e-05	4.01535e-05	1.12122e-05	6.20386e-07	0.000152	0.000182804	7.12981e-05	1.45456e-05	5.857e-05	0.00015969	1.04109e-05	2.42631e-05	0.000104428	4.16451e-06	1.91997e-07	0.000135827	0.000216114	1.28638e-06	1.74766e-05	4.86459e-05	9.22106e-05	5.78392e-06	0.000664192	1.45141e-05	1.61109e-05	2.44679e-05	0.00080155	0.000313709	0.00020201	1.33871e-06	2.1471e-05	0.000247449	6.22942e-06	0.000245048	0.000468663	4.26958e-06	2.70038e-07	0.000221136	1.28973e-06	2.19045e-05	0.000350185	4.00008e-05
7.7041e-06	0.000102832	1.63615e-06	4.22502e-06	2.20076e-07	0.000180141	5.96898e-05	5.56893e-05	1.06391e-05	0.000190777	4.07073e-06	8.76411e-06	0.000205084	3.31255e-05	1.1506e-05	6.22923e-06	0.00024295	3.4195e-05	0.000114716	1.49955e-05	0.000119152	0.000254905	3.52808e-05	3.53397e-05	4.35768e-05	1.47405e-05	0.000135308	0.00030452	0.000142214	4.92352e-05	4.14583e-05	1.34818e-06	1.49722e-06	0.00011026	1.62995e-05	1.09683e-05	0.000166612	1.06984e-05	2.72793e-06	7.06493e-05	7.04857e-05	3.20447e-05	9.88122e-06	2.29516e-05	9.35702e-06	6.66804e-05	1.29936e-10	8.94537e-06	2.21718e-05	4.03654e-05
0.000486178	3.03901e-06	7.91663e-05	0.000178512	1.35085e-06	0.000416215	9.51707e-05	2.52272e-05	1.31891e-05	5.31485e-05	2.30418e-06	0.000183414	2.28071e-06	1.77056e-07	5.95079e-05	1.38824e-05	2.26959e-05	4.74385e-06	2.61099e-06	3.63553e-05	2.87666e-05	0.000171653	5.99619e-07	0.000233699	8.83982e-05	0.0010191	1.53827e-05	1.95291e-05	0.00136128	0.000262069	4.91635e-05	2.15231e-06	7.03846e-05	1.35215e-06	9.67428e-05	3.05325e-05	0.000520576	7.71482e-06	0.000566523	0.000101138	3.04612e-06	9.91808e-05	0.00031306	2.03037e-05	5.90312e-05	1.21071e-06	1.57969e-05	0.00121812	6.66743e-05	4.14776e-06
7.24915e-05	6.45283e-05	3.6285e-05	6.26357e-07	3.01313e-07	0.000202522	4.87516e-05	2.39828e-06	1.06114e-05	8.14352e-05	3.00836e-05	0.000343408	4.0333e-05	2.95982e-05	5.40227e-06	0.000225219	7.71961e-05	0.000273776	0.000662552	9.42099e-05	0.000339435	0.00010232	6.07353e-08	0.000198723	0.000250122	9.78861e-06	0.000446489	0.00014529	0.000183349	0.000152571	0.000298549	5.68003e-11	1.75286e-05	0.000235064	1.39671e-05	0.000372314	2.97095e-05	7.13334e-06	2.83113e-06	0.000512178	1.09091e-05	3.90775e-05	1.69094e-08	6.23708e-05	7.97663e-07	4.02681e-05	0.000296052	2.79101e-05	3.99824e-07	9.29602e-05
1.1247e-06	4.84007e-05	0.000112006	0.000579908	1.0602e-06	0.00016717	0.000108626	3.19314e-06	5.30759e-05	1.40566e-05	9.38944e-05	7.90756e-05	2.64283e-06	1.48297e-06	0.000685856	5.04867e-06	0.000118451	0.000483151	1.83655e-05	0.000373889	1.74648e-05	5.52949e-06	2.28661e-06	7.95836e-05	1.91085e-05	5.78248e-05	2.65567e-05	3.86845e-05	0.000104512	0.000397249	3.8494e-06	6.98401e-05	6.38682e-05	0.000122253	8.89616e-05	3.72615e-05	0.000673639	0.000150492	8.76149e-09	3.78388e-10	0.000134273	9.74998e-05	8.06264e-06	1.23238e-05	0.000544663	0.000376024	0.00191066	4.7236e-07	0.000101699	4.56897e-05
3.16412e-06	9.02534e-06	3.50575e-08	9.34853e-05	4.48869e-05	1.45621e-06	9.95695e-06	1.5935e-07	5.14494e-05	7.31239e-06	5.94068e-05	9.05003e-07	8.36289e-05	4.30831e-05	1.30412e-05	8.46614e-06	9.84138e-06	7.75619e-06	0.000233855	0.000104467	1.00091e-05	2.68948e-05	2.36678e-05	0.000248221	1.37584e-05	0.000248814	1.48654e-05	1.10952e-06	3.92342e-05	1.84078e-05	9.85066e-05	0.000107452	0.000154343	3.53057e-05	0.000216884	9.85611e-06	0.00013898	6.05776e-05	4.52434e-05	0.000151644	0.000290519	0.000353885	0.000124797	1.97049e-05	7.66402e-05	1.49063e-05	7.97124e-06	0.000315737	2.60517e-06	0.000495742
9.11325e-05	0.000129981	5.23228e-05	1.27319e-05	9.18888e-05	9.31869e-06	0.000137891	6.39277e-06	2.26109e-05	7.98643e-05	0.000191183	0.000143391	3.82497e-06	2.45984e-05	1.80615e-06	1.09065e-05	3.58216e-05	0.00040002	0.000124865	8.51941e-06	6.99906e-06	0.000292287	5.72096e-08	0.000222229	2.25315e-07	9.87313e-05	2.28859e-06	0.000160571	3.16351e-05	2.23033e-05	5.90908e-05	6.18469e-05	2.35294e-05	7.24724e-06	2.5954e-06	0.000418797	1.61348e-06	8.34702e-06	1.84238e-05	1.74467e-05	3.20259e-06	4.39282e-05	0.000116998	1.31889e-08	6.73643e-05	0.000241243	0.000432684	4.44682e-05	4.16963e-05	0.000627196
9.08285e-05	3.91232e-06	0.000443803	0.000250103	5.59065e-05	1.23701e-05	0.000105545	2.91011e-05	1.17604e-06	2.29515e-10	4.66552e-05	2.66258e-05	2.41395e-05	8.65415e-05	0.000106013	4.37243e-05	0.000195556	1.84867e-05	6.07044e-05	7.53467e-05	0.00015707	9.15052e-05	5.69316e-05	6.82697e-06	3.75056e-07	9.56065e-05	0.000624244	1.11219e-07	0.000332302	3.02425e-05	0.000183997	1.59192e-05	6.26597e-05	9.66768e-05	5.28196e-05	9.12235e-06	3.62354e-05	4.54714e-05	5.53467e-05	0.000106552	0.000106956	8.07672e-05	1.21915e-05	0.000579046	2.0001e-05	3.15862e-06	0.000582174	0.000313682	0.000295195	0.000224127
0.000456046	3.81635e-05	2.42545e-06	0.000289451	0.000141577	7.62934e-05	6.39621e-06	0.00042335	1.91022e-05	2.23143e-06	0.000301455	0.000181339	0.000163459	1.26163e-05	0.000131683	2.45842e-05	0.000627086	0.000640949	6.48583e-05	6.89755e-06	5.5116e-05	6.66531e-05	3.14258e-05	2.48656e-05	1.25022e-05	0.00013226	4.08449e-05	0.000594855	3.92271e-05	7.95753e-06	5.05186e-06	1.64051e-05	0.000199726	2.03804e-05	4.8488e-06	0.000874966	8.52207e-05	8.4242e-05	0.000135787	0.000296333	0.000176009	0.000297079	0.000170513	7.10197e-05	7.4606e-05	0.000303079	5.00303e-06	2.37713e-05	0.000188156	0.000414174
0.000175267	6.04836e-06	1.52801e-05	8.36545e-05	0.000123922	2.98958e-05	5.72322e-06	4.2326e-05	3.64021e-09	0.000269217	8.49317e-06	0.00010734	4.15917e-06	0.000130035	0.000110288	0.000284109	6.14836e-05	1.7817e-06	3.73798e-05	0.000150471	4.71967e-05	0.000272086	0.000259068	2.17925e-05	0.000117758	0.000264632	0.000747897	1.31523e-05	6.52017e-05	0.000187373	7.84554e-05	3.72258e-05	6.85517e-07	1.71339e-05	1.02671e-05	0.000159199	3.06322e-05	0.000221531	1.78962e-05	0.000959311	4.95627e-05	0.00020318	0.000722487	0.000321865	0.000218867	4.22715e-08	0.00156917	0.000149502	1.16196e-05	5.4537e-05
0.000140467	3.38589e-05	5.24496e-05	2.88566e-05	0.000180689	0.00104147	3.86603e-06	9.38582e-05	0.000292565	0.000158389	1.48575e-05	0.000139491	0.000322739	2.26391e-06	3.3105e-06	1.61959e-05	0.000287774	0.000112703	0.000162949	9.97446e-07	0.00011544	0.000198746	0.00146068	0.000947911	0.000112219	2.98889e-07	0.000872995	1.16187e-09	0.000107596	0.000971896	0.00117082	0.000392213	0.00023259	0.000396773	0.000387998	0.000288871	0.000136474	2.95235e-05	0.000187331	0.00154728	6.17261e-05	0.000199656	0.00167299	0.000145513	0.000902204	0.000710406	0.000114394	6.59074e-07	8.59123e-05	4.20772e-05
6.74781e-06	2.98579e-06	8.83915e-06	6.56648e-05	4.94455e-07	9.38404e-06	0.000143615	0.000235541	0.000127188	1.19586e-05	0.00102422	2.26023e-06	0.000101654	5.58291e-06	4.52985e-05	0.000436902	7.56413e-06	0.000257347	0.000193982	0.000238946	0.000145474	4.4572e-06	0.000193646	0.000107509	2.91719e-05	2.70288e-05	0.000804334	0.000106072	0.000142193	0.000168002	0.000380344	0.000381423	2.41483e-05	2.47149e-06	2.38657e-06	0.000436286	0.0010812	7.63067e-05	0.000626442	2.16845e-05	0.000198301	0.000217665	1.73618e-05	1.5525e-06	0.000787259	0.000420305	0.000172619	0.000371877	4.91483e-06	5.39325e-05
6.57672e-06	1.33026e-06	1.60042e-05	3.36808e-05	9.01514e-05	3.67928e-06	7.04124e-05	1.37537e-06	0.000971372	4.46663e-05	0.000335931	2.11443e-05	0.000239104	5.51257e-07	0.00164471	9.92594e-05	8.19224e-07	1.96031e-06	0.000374807	0.000275641	0.000163319	0.000858115	5.89189e-05	4.1855e-05	0.00018836	0.000241888	1.79139e-05	0.000651461	2.67247e-07	1.45853e-05	0.000106091	0.0012499	8.4198e-05	0.00030152	2.17935e-05	8.14585e-05	0.000409019	0.000772262	0.000189832	0.00226595	3.54686e-05	0.000432086	0.000376843	0.000288935	0.000244469	0.000335517	0.000507434	7.75107e-06	3.45741e-05	0.000152287
0.0004497	1.33099e-06	7.27061e-07	0.000287691	0.000178997	0.00033131	8.39659e-05	7.90493e-06	9.218e-06	0.000167137	9.11631e-05	3.25533e-06	0.00126203	0.000382333	0.000875598	2.60326e-05	2.17196e-06	0.000427313	0.000296295	0.00139567	1.69439e-06	3.8604e-05	1.26355e-06	0.000183649	5.28222e-05	3.35856e-05	1.14819e-05	0.00191073	0.000383147	0.000617959	0.000395368	0.000655864	9.71866e-06	0.000107445	3.23542e-05	0.000260891	5.28269e-05	2.67898e-05	8.53107e-05	0.000151192	7.19797e-05	8.92399e-05	0.000723571	2.36329e-05	0.000109604	0.000355833	0.000955992	5.51887e-05	7.0961e-05	0.000545242
0.000741238	0.000112662	0.000268024	0.000149753	1.79251e-05	0.000183124	8.71942e-05	4.67629e-06	0.000292232	2.42028e-06	0.000123767	1.47723e-05	0.000307427	0.000188295	4.78999e-05	7.57536e-05	8.14167e-05	8.27942e-05	2.89221e-05	1.07911e-05	0.000437728	6.40855e-05	0.000198373	4.66055e-05	3.97178e-05	0.000115487	6.76413e-05	0.000274913	2.13877e-06	0.000109695	5.62624e-06	3.47952e-05	4.43136e-05	2.84903e-05	0.000283353	0.000952122	1.82151e-08	1.75028e-06	6.54192e-07	2.07361e-05	1.10214e-07	2.04351e-06	0.000121476	0.000130179	0.000960589	0.000339544	0.000128158	0.000110926	0.000605455	0.000304853
1.88693e-06	2.16294e-07	4.88041e-05	9.01402e-06	4.14466e-05	1.45472e-05	4.11294e-05	1.51963e-07	5.45926e-05	1.46506e-05	2.16239e-06	0.000556222	1.96495e-05	5.44627e-05	0.000332891	0.000116759	0.000524888	0.00197642	0.000446024	0.000569615	0.000627386	0.000627722	1.86179e-05	4.27e-05	0.000204863	3.96085e-05	0.000118472	4.28544e-07	9.84079e-06	0.000104249	7.65559e-05	5.57185e-06	0.000155056	3.98291e-09	0.000833329	1.51728e-05	0.0022846	0.00033107	0.00042263	7.58325e-05	0.00121938	0.000287534	1.62368e-05	0.00190944	6.2527e-07	0.00105651	1.28151e-05	0.0011227	4.14704e-05	0.00101049
8.66304e-06	0.000646112	1.22171e-05	0.000614726	3.26706e-05	6.71289e-06	1.56441e-06	2.98673e-05	0.000720738	6.27852e-05	2.52037e-06	0.000227583	5.01146e-06	0.000225435	2.59886e-06	0.000390655	4.02067e-05	1.06047e-05	0.000183237	0.000200366	6.97632e-07	0.000250143	0.000185669	0.000216081	0.000136309	0.000107759	1.83828e-06	0.000261812	0.000241574	0.000524647	2.64563e-07	4.27734e-07	5.9957e-07	6.64121e-05	0.00029488	0.000139889	9.12717e-07	3.51731e-06	4.45355e-05	0.000516687	0.000235073	0.000374776	9.15267e-08	0.000151573	0.000432414	2.49521e-05	1.75332e-05	0.000265847	5.98642e-05	6.17106e-05
9.10358e-07	0.000106122	2.21632e-07	4.54311e-06	1.93228e-06	0.000366964	0.000444172	0.000108702	0.00027542	3.09969e-06	1.23863e-05	7.09994e-05	0.000142717	2.41385e-05	6.14126e-05	6.47199e-05	0.00027819	0.000853027	0.000282895	0.000656701	0.000994816	0.000325798	0.00123197	4.35071e-06	3.94115e-05	0.000276536	0.00144082	0.00168365	8.12242e-05	0.000596942	0.000836994	0.000494991	3.27235e-05	6.01694e-05	0.000709198	0.000145841	0.000308332	2.39446e-05	5.65194e-05	0.00162149	0.000299773	0.000178877	0.000883102	7.42923e-05	0.000718845	0.000355109	0.00152875	8.10162e-06	0.000104313	7.50582e-05
9.25496e-05	2.70379e-06	0.000218568	0.000210995	0.000310511	0.000189238	8.22699e-05	9.29982e-05	9.31407e-06	0.000329229	0.000280103	0.000150949	0.000105377	0.000312781	2.30316e-06	0.000119511	0.000230159	0.000148673	0.000413191	0.000319775	0.000353837	0.000355019	2.4966e-06	0.000572155	2.06375e-06	0.000410686	1.83362e-05	0.000942296	9.71388e-06	1.70965e-05	3.2979e-06	0.000125401	3.73458e-05	2.88145e-05	0.000851063	0.000410895	7.73801e-05	3.10478e-05	0.000465496	0.000423911	0.000182349	4.35187e-05	2.80823e-05	0.000626853	0.000296536	1.39248e-05	0.000138214	0.000158789	0.00120804	0.000197424
0.000213516	0.000127322	5.767e-06	0.00030878	6.76906e-05	6.59349e-07	3.89049e-06	2.03656e-07	9.69454e-05	1.5513e-05	1.90893e-05	0.00107357	0.000190401	5.90021e-05	0.000118033	0.000195837	0.000104096	1.34651e-06	0.000102898	0.000352697	0.000339225	0.00150396	0.000161464	0.000331512	0.000157306	0.000638044	0.000110573	0.000563544	0.000202357	4.54499e-06	8.11851e-05	9.49243e-06	0.00105256	0.000600846	7.30286e-05	1.99095e-05	0.000108316	0.000248949	0.00089886	0.00220418	0.000180446	0.00178668	0.00102824	0.000647293	5.41596e-06	1.00524e-05	0.00055027	0.00157429	5.88049e-05	0.000583827
0.000481009	0.000157693	1.7651e-05	0.000221871	3.07589e-05	6.45617e-05	1.42895e-05	0.000273969	0.000180524	5.45662e-05	0.000240866	2.82511e-05	0.000812101	7.96016e-06	7.91657e-07	0.000173162	0.000163211	4.13026e-06	0.000495097	0.000267952	0.00082905	0.000173182	4.10631e-05	7.02905e-05	0.000112338	0.000772027	0.000127222	1.76478e-05	0.00044051	6.99426e-08	0.000493139	0.000369013	0.000371208	0.000494646	8.50383e-06	0.000403051	7.56298e-06	6.176e-05	3.24537e-05	0.00263206	9.88477e-06	2.93757e-05	0.00196213	6.33122e-05	1.98409e-05	0.00226412	0.00067282	0.00062957	0.000911497	0.000467044
0.000421039	6.71487e-05	4.66474e-05	4.82028e-09	9.43541e-05	5.18922e-08	4.5253e-05	0.00077237	0.000417788	7.23112e-05	6.34806e-06	6.30388e-05	8.21054e-07	7.24032e-05	0.000472326	8.64621e-05	0.000158435	5.20247e-05	0.000105474	0.000412164	6.36868e-05	7.5809e-05	0.000474073	0.000313802	0.000349871	6.49044e-05	0.000569001	7.60326e-07	0.000119098	0.000263315	1.42046e-05	9.59937e-07	0.000519582	0.000298719	0.000623172	0.000509416	0.000884438	0.000445775	9.7646e-06	0.00052314	6.7694e-06	1.34681e-05	1.60242e-05	0.000118222	0.000454127	0.00176848	0.000968635	0.000477693	0.000575961	0.000366583
8.66069e-06	2.10939e-05	1.59684e-05	0.00035191	0.000244344	2.30502e-05	4.82691e-06	8.70291e-05	1.15759e-06	3.06591e-07	0.000517436	7.80657e-08	6.50063e-07	1.33955e-05	8.53388e-05	2.5502e-06	0.000515742	4.51123e-06	0.000253908	1.49576e-08	5.28227e-05	0.000289922	6.3813e-06	1.27053e-05	0.000180071	2.33976e-07	5.80095e-05	1.07339e-06	0.000310241	6.50847e-05	8.79646e-05	6.53705e-05	0.000152588	3.15633e-05	0.000117781	0.000657732	0.000171028	7.62884e-08	0.000233353	1.94932e-05	0.000100511	0.000316426	1.17797e-07	0.00018181	0.00011383	0.000437477	0.000523133	2.02801e-05	0.000453033	0.000149798
5.9382e-05	9.07507e-06	4.32513e-06	0.000388739	3.01585e-05	0.00047769	0.000423542	5.08883e-05	5.02333e-06	0.000549723	9.32128e-05	5.17671e-06	2.0946e-05	4.05162e-05	4.70737e-05	5.06861e-06	0.000375643	0.00310647	1.0465e-06	1.91366e-07	6.89231e-06	0.00130359	0.000616614	0.000116527	0.000308523	0.00209793	0.000320149	0.00127043	0.00109841	0.00150251	0.000446249	0.00145034	3.26703e-05	5.0378e-06	0.00267699	0.000189718	0.00256429	3.03466e-05	1.31511e-05	0.00115513	0.000726919	0.000106181	0.00029825	0.000148736	0.00107602	0.000997597	0.00458622	4.70065e-05	0.000397933	2.34474e-05
4.31505e-06	8.14332e-05	8.84833e-06	9.89422e-07	0.000182546	2.85781e-08	6.19998e-05	0.000103662	0.000184691	2.50332e-06	0.00022943	3.75813e-05	0.000179797	1.30474e-05	1.484e-08	7.58089e-05	7.54701e-05	0.000530796	7.62917e-09	0.000309631	0.000296275	1.66507e-05	0.000165329	3.51782e-05	2.12324e-05	5.7907e-05	0.000258993	0.000286424	0.000232559	1.00128e-05	0.000113597	0.000714828	0.000546964	3.74199e-05	1.48084e-05	0.000425182	0.000826853	0.00016747	8.50094e-06	0.000407239	0.000149183	0.000320618	0.000206917	0.000600141	1.71659e-05	0.000586552	3.84127e-06	0.000100701	0.000508466	0.000563407
0.000342543	0.000153639	1.48539e-05	0.00051867	2.32511e-05	7.85749e-06	0.00046543	0.00022836	1.05798e-05	0.000110177	0.000176604	0.000199868	0.00031506	8.09706e-06	0.000181686	0.00108394	2.36391e-06	0.00028202	0.000192079	0.000282301	5.49012e-05	0.000604466	3.96507e-05	0.000457983	3.43336e-05	0.000643057	0.000898011	0.00290502	0.000445018	0.000785159	6.56506e-05	0.00130542	5.58375e-06	4.11642e-05	0.000132729	4.81871e-05	0.000952462	6.69975e-05	8.98189e-05	0.000494813	2.57863e-06	0.000136518	9.41275e-08	0.00176294	0.000205016	0.00181869	0.00271168	3.24977e-08	9.41126e-05	0.000319375
4.03962e-05	3.22418e-06	1.01877e-05	0.00045933	6.65935e-05	0.000478651	6.34165e-06	1.93146e-05	2.25494e-05	1.99493e-05	3.24681e-05	6.13417e-05	1.22782e-05	0.00143014	0.000952171	0.00080806	0.000323679	0.00125582	5.98552e-05	5.12149e-05	0.000692661	0.000461742	1.30679e-05	6.01804e-05	4.35207e-05	3.30738e-05	0.000182814	2.67858e-06	0.000869606	0.000876542	0.000587138	0.00010827	0.000150016	0.000514609	0.000754735	9.33636e-06	0.000181115	6.10374e-06	4.02554e-07	0.00304827	5.68597e-05	9.64726e-06	6.95806e-05	0.000674511	6.59789e-08	0.000118159	1.69607e-05	0.000195719	0.000694787	6.10771e-05
1.991e-05	1.49831e-06	4.43171e-05	6.17883e-05	1.62445e-05	1.73777e-05	1.47018e-05	8.10197e-08	0.000119368	8.82394e-05	0.00016786	1.60931e-05	6.17615e-05	5.6758e-05	0.000243084	2.90805e-06	0.000411988	3.69774e-05	2.39745e-05	1.05325e-05	0.000166565	1.80171e-05	0.00136536	0.000641199	1.10565e-05	0.000269128	0.000299819	0.000984301	0.000113098	9.49842e-05	0.00023384	0.000255181	0.000643408	4.03188e-06	0.00148484	0.000117186	0.00224931	9.55165e-05	0.000387339	0.000712344	4.29818e-05	1.81238e-05	0.000715804	0.000843332	0.00184807	0.000206556	0.000440781	0.000158333	5.87004e-05	4.15597e-05
2.17239e-05	0.00010903	0.000100647	2.91989e-05	3.92494e-05	9.5542e-05	5.87596e-06	9.69873e-05	6.04081e-07	5.57279e-05	0.000283214	5.1803e-06	5.42998e-05	1.49469e-06	0.000292809	9.29965e-05	5.50417e-05	0.000172231	0.00060341	3.53281e-07	0.000383971	0.00049717	0.000124184	0.000290136	0.000601643	1.77166e-08	0.000958694	0.00104212	4.32792e-06	0.000132008	4.20614e-07	3.73965e-05	2.11175e-05	0.00041686	0.000209777	5.58478e-05	0.00132766	0.00131751	0.000657424	0.000763525	6.21352e-05	0.000297136	2.33872e-05	0.000446581	0.00048197	0.00465001	0.00084648	1.65458e-07	0.000147025	0.00144218
2.24262e-05	3.36084e-05	0.000277634	0.00018366	5.46727e-05	0.000369282	4.04588e-07	0.000179209	0.000168534	0.000185891	0.00023788	0.00122476	0.00032071	0.000396252	1.6132e-06	0.000417055	0.000286194	0.000622662	8.3442e-06	0.000669975	0.00277246	0.00143654	0.000225853	0.000137204	0.000395388	0.000163133	8.56188e-05	0.000338466	8.02456e-05	1.02501e-07	7.04544e-05	4.50032e-05	7.5822e-05	0.000292988	0.00341157	0.000178888	0.000389915	2.06237e-05	0.000845279	0.000810915	0.00022469	0.000143074	4.71469e-05	0.000951886	5.22332e-05	0.000139268	6.17318e-05	0.00104745	0.001495	0.00175545
1.94015e-06	4.89037e-05	9.25127e-05	0.000469766	2.22081e-05	2.26899e-05	6.48188e-05	2.8402e-05	7.5363e-05	0.000520463	0.000100231	9.87095e-06	0.000372195	6.65757e-06	0.000355334	1.97445e-05	9.911e-05	0.000105154	0.000200242	2.69326e-05	9.60441e-05	6.90676e-07	0.000229779	0.000527475	9.91019e-06	0.000503228	6.02756e-05	0.000491445	0.000118637	4.42672e-05	2.38812e-06	1.74806e-06	5.08221e-05	1.58462e-05	2.48386e-05	2.33044e-06	1.21054e-05	3.98428e-05	0.000261732	0.000121769	8.8514e-05	0.000322178	0.000799654	0.000377233	0.00100697	0.000626678	0.000136641	0.000496513	0.000152143	7.99834e-05
1.41549e-06	2.64287e-05	0.000207009	3.47832e-05	6.92518e-05	2.31964e-05	1.60798e-05	0.000201235	1.14667e-05	8.49515e-05	0.000268882	2.67538e-05	0.000110489	0.000130196	6.54233e-05	0.000938275	1.50401e-05	0.000188672	0.00013118	0.00116979	0.00086783	0.00219809	0.000524577	0.000488191	3.39557e-05	4.10461e-05	0.000200079	0.000577232	0.000568802	0.000546774	0.000236005	0.000835186	0.000532032	0.00158585	1.18265e-06	0.000214911	0.000471338	1.43747e-05	3.4989e-05	9.40291e-05	1.34518e-05	0.000109406	0.000118762	0.000726952	0.00190791	0.000467488	0.000763935	3.29945e-06	0.000193014	0.000541609
3.29833e-06	0.000294468	3.29399e-05	0.000325207	0.000187852	6.39478e-05	3.08635e-05	1.10552e-06	0.000121619	0.00015338	2.53145e-05	7.27662e-06	2.30535e-05	0.000177338	0.000925612	4.39572e-05	0.000114585	0.000568349	0.000172714	1.64773e-05	1.87843e-05	6.51762e-05	0.000198125	0.000216528	0.000368458	0.000443776	0.000103301	7.94733e-05	0.000179812	9.72399e-05	0.00118594	0.000394955	0.000410365	0.000136376	0.000254716	0.000610078	0.000100597	0.000120616	3.56321e-06	0.00032183	0.000256856	0.000423638	0.000633374	4.82904e-05	0.000795931	0.00143425	8.84744e-05	0.000272293	0.000499286	2.74693e-07
1.13251e-07	4.46724e-05	4.85158e-05	0.000260015	6.27835e-05	0.000212194	0.000104316	0.000400234	2.02268e-09	4.68491e-05	8.06051e-06	0.000464495	0.000178404	6.58024e-08	0.000299991	4.25344e-05	5.25509e-05	1.63822e-05	0.000321382	7.89502e-05	0.000403771	2.99505e-06	1.53356e-05	6.65209e-05	9.44252e-07	0.000693672	0.000113266	7.44607e-05	0.000965487	0.00118596	0.000186495	0.000470644	0.00136211	0.000118889	7.39871e-06	2.9728e-05	0.000993859	1.5214e-07	0.00104119	8.59418e-05	3.28268e-06	1.38013e-06	0.000185005	0.000598431	0.000177716	0.000140528	0.000163132	8.65707e-05	1.69902e-07	3.814e-06
0.00029754	6.089e-05	2.75649e-05	0.000578736	5.36619e-05	3.64037e-05	0.000214773	1.1918e-05	0.00022589	0.000162336	2.21181e-06	0.000396136	6.91596e-05	0.000232625	0.000183707	5.60687e-05	0.00046421	0.000271329	0.000166967	5.86418e-05	1.06152e-06	4.43669e-05	0.000272399	1.15487e-05	0.000279835	0.000446719	0.000127698	4.4693e-08	0.00161828	0.000186432	0.000599944	0.00029063	4.49697e-05	0.000899706	0.00140185	0.0012574	3.64327e-05	3.30791e-05	0.000195733	0.000328428	0.000755889	0.000231025	0.000124384	0.000418737	4.44534e-05	0.00035725	0.0013283	0.00044163	0.00189321	1.85852e-05
5.34471e-05	2.30341e-05	2.60833e-05	2.15301e-05	3.2518e-05	2.74675e-05	2.68319e-05	8.70058e-05	0.000236287	4.32325e-06	0.000341823	4.24298e-05	0.000309566	3.75168e-05	0.000276518	8.59294e-06	8.93497e-05	9.76319e-05	1.91159e-05	0.000765897	9.62914e-05	0.00116303	0.000342818	0.00118202	0.000139755	0.000994813	2.24519e-06	0.000134981	1.65654e-05	5.75112e-05	0.000489211	0.000947475	3.99946e-06	0.000132019	0.000173461	4.14908e-06	0.000372607	0.000563128	0.00126441	0.000931643	0.000709944	0.00180327	0.000154318	0.000632524	5.93047e-06	2.16536e-05	5.88858e-05	0.000275216	0.000492902	0.00022363
4.59442e-05	0.000673959	0.000172494	4.28542e-05	0.000172635	0.000153408	0.000221492	0.000638085	0.000277813	3.8997e-05	4.70071e-05	0.00290499	8.34808e-05	7.42561e-06	0.000170009	0.000864233	0.000254103	1.02604e-05	5.98332e-05	0.000900793	3.78626e-06	0.000470061	0.000577999	0.00044493	8.31842e-05	0.000358596	3.90226e-05	0.000642178	0.00134512	5.67533e-05	4.85534e-05	3.77272e-06	1.12533e-09	0.000461307	0.000605022	0.000502397	1.41396e-05	1.74292e-05	0.00175951	0.000459708	0.00121388	0.00373799	0.000215854	2.035e-08	0.000289715	0.000835587	1.4154e-07	0.00210169	0.000546786	0.000741959
7.29754e-06	0.000154141	0.000243716	7.81715e-06	0.000146073	0.000214725	7.32515e-05	0.000454966	0.000314269	0.000177472	4.50553e-05	8.79067e-05	0.000141483	2.03975e-05	9.31866e-05	0.000155539	4.3669e-05	3.07254e-08	0.000224011	0.000195137	0.000309193	6.78463e-07	0.000176506	0.000115085	0.000418362	0.00102006	0.000155752	7.61788e-05	0.000149518	2.73297e-06	0.000390987	0.000948491	0.000578315	2.24803e-05	0.000243842	0.000400528	0.000272162	2.00997e-05	0.000665842	0.000196724	0.000170719	0.000926522	0.00241033	0.000490782	6.93432e-05	0.000511728	0.000146141	0.000288408	1.61638e-06	0.000123864
6.15425e-05	2.66692e-06	0.000138502	8.41436e-06	0.000134641	3.10768e-05	2.57813e-06	9.21682e-05	5.23293e-06	0.000273781	5.66668e-07	2.14636e-05	2.03964e-05	4.38352e-05	0.000173249	0.000236467	1.13253e-06	0.000117373	1.40763e-06	1.68437e-06	0.000240462	4.97301e-06	0.000219998	9.4516e-05	0.000447648	0.000156055	6.53914e-06	0.000144603	4.78401e-05	5.33722e-05	1.48256e-05	0.00095415	0.000201128	0.000262363	0.000755172	0.000579208	2.93816e-05	0.0012276	0.000322582	0.000244192	0.000249651	0.000618266	0.000113848	0.00010035	0.000800363	2.20822e-05	8.22559e-06	0.000163293	0.000935779	0.00106482
8.2043e-05	0.000346246	0.000124239	0.000922802	6.2059e-05	0.000102069	0.00030994	6.96523e-05	9.41572e-06	9.95821e-07	0.000562419	0.000139561	0.000323941	3.1147e-05	4.71643e-05	0.000222061	0.000206725	2.79911e-06	0.000617272	0.00104363	1.38156e-05	0.000414378	2.48631e-05	0.000583441	1.18968e-05	1.0122e-05	0.000437716	0.00385866	0.00231023	0.000523287	0.00033211	0.00220983	0.000715579	6.55449e-08	9.59285e-06	0.000727551	0.00116555	0.000236199	0.000783162	0.000112151	3.82694e-06	2.79862e-05	0.00024524	0.00107592	0.000200596	0.003142	0.00381716	0.000495421	0.000299152	6.07782e-05
5.36877e-05	0.000242821	5.07925e-05	0.000361644	6.91411e-05	9.76654e-06	4.91169e-06	6.98319e-06	7.72069e-05	1.88813e-05	0.00015945	2.92821e-05	0.000297853	0.00028966	2.85878e-05	8.38322e-05	1.39988e-05	4.93468e-05	5.76041e-08	7.27896e-07	0.000266156	9.65244e-06	0.000135281	0.000164151	0.000112488	0.000168096	1.89662e-05	8.59682e-06	0.000468113	1.52519e-05	0.000163904	0.000376776	0.000560999	0.000122686	0.000580312	0.00141602	0.00012202	0.000266119	0.000293618	0.000301468	0.000278771	0.000181862	0.000130375	0.000541395	9.03289e-06	2.62903e-05	0.000229308	0.000366234	0.00267335	0.000485554
0.000381815	0.000342035	0.000265344	0.000187472	0.000326479	0.000288182	3.10764e-05	0.000937664	0.00123041	0.000541197	0.00025241	0.000964506	0.000574502	0.000228697	0.000559452	0.000875693	0.00104635	0.000706113	0.000149593	0.00098535	0.000274828	0.000943478	8.72212e-05	3.61537e-05	9.94065e-05	5.14987e-07	0.000833078	8.76682e-05	0.000935183	0.000212502	5.29978e-05	0.000299405	2.84357e-05	0.000699158	0.00328313	0.000577392	0.000175823	6.43456e-06	0.000815512	0.00282252	0.00118543	5.38574e-05	0.000123313	0.000121795	0.000312642	2.12551e-05	0.00043014	0.00445813	0.00238571	0.000526608
0.000260252	0.000242793	0.00027033	0.000155182	0.000102603	0.000231248	0.000223495	0.000552865	7.99455e-05	0.000532659	0.00041544	0.000404007	9.5343e-05	4.91313e-05	0.000852681	4.87768e-06	0.000113745	5.10445e-05	0.000903741	9.88706e-05	5.4388e-05	0.000171504	0.000454184	0.00070488	0.000459059	0.000115007	1.22628e-06	0.000269654	0.000224515	0.00110614	0.000240546	0.000634372	1.50794e-06	0.000406808	4.44666e-05	7.71011e-05	0.0030495	0.00108118	0.000145861	0.00016491	0.000861129	0.000404659	8.85911e-05	0.00331835	0.00203853	0.0080223	0.00308508	0.000392376	9.33643e-05	0.000538235
6.35123e-06	3.43638e-05	1.07056e-05	0.000104143	2.96999e-05	9.47519e-05	6.35206e-05	5.80744e-05	6.92336e-06	0.000311995	1.90179e-06	6.54249e-09	9.06653e-05	0.0003897	6.04156e-05	3.85704e-05	0.000885406	0.00100982	0.000214838	5.8453e-05	0.00031098	0.000704855	0.00078656	0.000343879	7.95976e-05	0.00105132	0.00237362	2.83507e-05	4.25822e-05	0.000240861	0.00153108	8.28532e-05	7.40224e-05	0.000724944	0.000375078	3.03676e-05	0.000381078	7.74415e-05	0.000650786	0.00158568	0.00149734	0.000675955	0.00259206	0.000319561	0.000381098	0.000227955	0.00263379	0.00044633	0.000587876	0.000634874
0.000233914	0.000181246	3.89176e-05	5.93978e-05	6.42404e-05	0.000513345	0.000196948	0.000241519	0.000462235	0.000132663	1.15778e-05	0.00108684	0.000147393	4.36983e-06	0.000248357	0.000170476	0.000153775	3.78322e-06	3.38368e-06	0.000102464	0.000309356	1.15211e-07	6.62241e-05	5.00376e-06	2.14797e-05	1.79413e-05	0.000120378	1.62688e-07	0.000903875	3.91176e-05	0.000354826	6.2561e-06	0.00060441	0.000955261	2.7795e-05	3.49841e-05	0.000120846	0.000248293	1.99449e-05	0.00449896	7.79258e-05	0.000751254	0.00195227	6.05805e-05	2.64388e-05	0.000493401	1.06007e-05	2.68841e-05	0.000735785	0.000187128
0.000487162	0.00136262	9.78347e-05	7.62233e-05	3.61601e-05	0.000121609	0.000384595	1.12471e-05	0.000209291	0.000413179	3.41093e-05	0.00103309	0.000168129	0.000114977	0.000314772	0.000329448	2.24965e-05	4.83407e-05	0.000910953	9.61208e-07	2.06317e-05	0.000612248	7.34984e-05	0.000356597	0.000727481	2.15324e-05	0.000320447	0.000200191	6.12473e-05	0.00053848	0.000135547	3.92602e-07	0.000140344	0.000175771	0.00101962	0.000608374	0.000275993	3.36945e-05	2.11207e-06	0.00014835	0.000162524	1.20652e-06	0.000123638	0.00269147	0.000373601	3.93248e-05	1.89486e-05	0.000327484	1.71952e-05	2.69025e-05
0.000356551	0.000675219	0.000163753	0.000155662	8.6121e-05	4.88336e-05	0.00104803	3.05375e-05	0.000386013	2.9522e-06	3.79941e-05	1.69618e-05	6.72137e-05	6.13649e-05	0.000289198	2.63224e-06	0.00072055	5.78069e-05	0.00192009	2.40579e-06	0.000962256	0.000783778	3.99861e-05	0.000869559	3.78235e-05	1.0102e-05	9.42948e-05	0.00132259	2.52902e-05	1.49631e-05	0.000187353	4.55343e-05	5.37854e-06	0.00063767	2.84029e-05	0.000970217	1.92807e-08	0.000956692	4.55637e-06	0.000223191	6.84257e-05	0.000151908	7.5781e-08	7.83762e-05	0.0006729	0.00180541	0.00120983	2.99955e-05	0.000195457	0.00146709
0.000391348	0.000101039	5.87905e-08	5.29557e-07	0.000214442	0.000833063	3.7966e-05	2.5765e-05	9.74201e-05	0.000184652	1.33112e-05	2.94737e-05	1.52462e-05	0.000991292	0.000480585	2.89981e-06	0.000479407	0.00154246	0.000203691	0.000140587	0.00017628	0.00343938	0.000967832	0.000232126	0.00032486	0.00038635	0.000257962	0.000474508	0.000536999	1.80313e-06	0.000100717	1.08946e-06	0.00044656	7.17023e-05	0.00172937	1.5116e-08	3.54188e-05	0.00119367	0.000563912	7.2449e-06	0.000128507	0.000389617	0.000423316	3.84148e-07	0.00126337	0.000879548	0.00082981	0.000290657	2.91944e-06	0.000627056
3.88387e-06	8.21096e-07	3.02315e-08	0.000121186	0.000100242	0.000291539	7.96331e-05	8.41993e-05	4.21435e-05	0.000369879	0.000312743	0.000179933	6.25093e-06	5.0568e-07	0.000351523	1.5883e-05	3.99758e-05	3.22254e-05	8.74707e-05	1.37837e-06	0.00136452	0.000298216	0.000785216	0.000517207	0.000600966	1.87893e-05	7.09036e-05	0.000293424	0.00033936	9.25868e-05	4.03167e-07	0.000297003	4.20459e-05	0.000696647	0.00085347	8.8545e-05	0.000989155	0.000830767	0.000148522	8.04897e-07	0.000317796	0.000637572	7.80299e-05	0.00202379	0.00186162	0.00324095	0.000111365	0.000575264	0.00077649	0.000968026
1.60575e-05	2.12363e-05	1.31807e-07	0.000224969	2.76162e-05	0.000223943	0.000642821	3.75017e-06	4.94918e-05	0.000149993	3.696e-05	0.000147989	4.73439e-07	0.000333798	7.03057e-06	5.98385e-07	0.000112913	0.000500512	0.000269354	2.14617e-05	0.000678113	1.17918e-05	8.55379e-05	4.24995e-07	0.000333144	0.000361524	0.000706255	0.000371095	4.16114e-05	0.000248409	0.000702285	1.82292e-05	0.000380617	0.00025247	9.6696e-05	0.00028784	4.2974e-06	6.82058e-05	0.00014256	2.7764e-05	0.000638105	6.29452e-05	0.00044084	0.000368479	1.29114e-05	1.31709e-10	0.000345705	0.000156836	0.000813563	0.000781913
2.44015e-07	6.04948e-06	5.5432e-07	0.00016966	0.000236053	8.59908e-05	1.30607e-05	0.000263761	0.000168749	8.65074e-07	8.67772e-05	0.000302719	0.000271178	2.40142e-06	0.00023381	0.000226019	0.000120347	0.0003417	6.09769e-06	1.68392e-06	6.00006e-06	0.000255579	0.000190017	0.000250918	1.88108e-05	0.000396095	8.22769e-05	0.000200812	2.2024e-06	0.000628645	9.61072e-05	0.000368374	0.000420899	3.90764e-05	6.87992e-05	5.96725e-05	0.000384271	0.000158712	0.000405528	3.15779e-05	8.96089e-05	8.92623e-05	0.000413352	0.000582748	0.00108842	0.000648072	6.45623e-05	0.000212708	0.000608392	2.51242e-06
0.000174844	0.00026809	0.000246262	9.19506e-05	1.55622e-05	4.53091e-05	0.000109079	0.00120902	0.000900737	4.6618e-06	3.75605e-05	3.64434e-05	0.000572778	3.33426e-06	0.000139584	0.00103192	7.83155e-05	0.000237006	0.00125559	0.000443439	3.49933e-06	9.62881e-05	0.000320833	0.00109295	0.00022459	0.000389929	0.00201712	1.70237e-05	6.1759e-05	7.94154e-06	0.00025322	0.000316826	5.9886e-05	0.00110021	8.89312e-05	1.72668e-06	0.000986006	6.55955e-05	8.46529e-05	0.00107637	7.82941e-05	0.000528327	0.0010484	0.00183708	0.000547086	0.00154987	0.00242707	0.00019081	4.27807e-05	0.000444756
3.15053e-05	8.15449e-06	0.000461173	0.000189569	0.000237662	2.22676e-05	4.16893e-07	1.91268e-07	1.26215e-05	6.14778e-09	0.000230526	7.91407e-07	1.3353e-05	7.5579e-05	1.12604e-06	1.09565e-05	0.00100526	8.60532e-05	0.000253297	3.89802e-06	0.000840554	3.90416e-06	0.000102792	0.000887844	0.000189246	0.00029426	0.000121855	0.00077606	1.44079e-05	3.79973e-06	3.1866e-09	1.78628e-07	2.22798e-07	0.000772791	0.000743195	0.000661309	0.000728873	0.000198183	2.92233e-05	7.84222e-05	0.000301313	0.000172824	0.000124104	0.000988376	0.000688676	0.00124655	0.00134035	0.000293855	0.000900452	0.000791438
4.18206e-05	2.0701e-05	9.6521e-05	4.30589e-08	0.000351636	0.00046011	6.34236e-09	0.000183734	2.54923e-05	7.22394e-05	5.54613e-05	0.000585552	0.000214305	0.00385859	0.000387224	0.000340067	0.00346332	0.00762753	2.08562e-05	0.00295868	5.48502e-06	0.000233476	0.00122289	0.00481129	4.9149e-05	0.000344065	0.00106294	1.43708e-05	0.000476062	0.000176585	0.000715053	0.000115513	0.000179416	1.15693e-05	0.00320211	0.00012858	0.00108847	8.70852e-05	0.00197138	0.00029027	0.00225138	0.00565842	0.000158769	0.000509067	0.00165836	0.000103404	3.19855e-05	0.00499145	0.000993191	0.000203923
6.9242e-05	5.41163e-05	6.08834e-05	8.92343e-06	9.09819e-05	7.11513e-07	0.000196755	2.80638e-05	0.000153573	0.000179245	0.000391921	5.30461e-05	1.077e-06	0.00026059	2.98161e-05	1.03164e-06	9.52481e-09	7.28343e-05	0.000130906	6.95606e-05	0.00035742	0.000185096	9.79218e-07	0.000432924	0.000213144	0.000144219	1.21885e-05	0.000382701	0.000226226	4.92947e-06	9.90669e-05	5.02449e-06	0.000956412	0.000127404	0.000457936	0.000722906	0.000564782	0.000208542	0.000857047	7.14957e-05	0.00105398	6.80562e-05	0.000215764	0.000604174	9.37147e-05	0.000392654	0.00161628	0.000452605	0.000942668	0.000779351
6.3961e-05	3.79362e-05	2.99542e-06	0.000214432	2.09324e-06	0.000171753	9.32994e-07	0.000233384	0.000351494	0.000271055	0.000156696	0.000141622	1.24652e-07	0.000345765	5.77841e-07	0.000279761	0.000244853	5.95293e-05	0.000258361	9.92072e-06	0.000908392	7.05893e-05	0.000196216	0.00046029	0.000357106	8.47706e-07	8.28396e-08	0.000183146	0.000311977	1.71645e-05	0.000204586	0.0011444	0.000249662	7.13975e-09	0.000184355	0.000833591	0.000492916	0.000189491	0.000550137	4.09668e-06	0.000542622	0.000209492	0.000277898	9.20942e-05	1.79615e-05	0.000105275	1.43495e-05	0.000240099	0.000748923	0.000702953
3.07349e-05	0.000124019	0.000371635	3.42896e-05	2.69576e-05	1.27805e-05	7.96945e-05	0.00128529	0.00134941	0.000109917	2.85708e-05	0.000147204	0.000753121	9.58198e-05	1.24418e-05	0.000234125	3.48743e-05	7.04184e-08	3.59717e-05	0.00162039	3.19651e-05	9.07646e-06	8.10118e-06	0.000208971	0.000151358	0.0010977	0.0020914	0.00207233	5.79446e-06	0.000377295	3.68531e-06	0.00168389	0.000148694	4.67673e-07	0.00035986	0.000663949	0.0019887	2.60441e-05	0.00194859	0.000850578	0.000261408	0.000477944	0.00194739	0.00201373	0.000571038	0.000101056	0.00148809	0.00186812	0.000658261	4.10972e-05
0.000384464	1.04494e-05	3.25916e-05	1.85272e-07	0.000266791	0.000130117	4.06639e-06	4.67916e-05	0.000110519	2.30581e-06	4.56075e-05	1.12377e-05	7.05244e-06	0.000214683	5.48495e-05	1.67855e-05	0.000401223	0.000372738	7.45833e-05	2.20775e-05	6.55531e-05	7.35922e-05	0.000105052	1.35408e-05	8.23577e-07	0.000448236	0.00032897	3.72741e-05	1.62848e-07	0.000206542	0.000128143	3.58964e-05	0.00010415	0.000330694	2.70653e-07	0.000290043	0.000343657	2.10293e-05	9.34363e-05	0.000130513	0.000223413	1.09536e-06	0.00050995	4.27167e-05	7.79334e-05	0.000318967	0.000281934	4.57708e-05	0.000424976	0.000163668
2.32533e-06	5.82927e-06	0.000233741	1.73151e-06	9.01534e-07	0.000114822	4.40186e-06	0.000315694	0.000151072	5.28764e-05	3.42623e-05	0.000339757	0.000610576	0.000493371	1.04271e-05	3.6881e-06	0.000610291	0.000184571	0.000310459	3.07171e-06	0.000687769	3.42308e-05	0.000190954	1.04122e-05	0.000210336	0.000157619	9.94506e-07	0.000218443	0.000149463	4.94538e-05	0.000361652	0.000571266	0.000744981	0.000573616	0.000314802	0.000574202	0.000209879	8.57497e-05	0.000546282	0.000203743	0.000239279	0.000143206	0.000164717	0.000214859	2.97462e-07	0.000159894	8.46692e-05	0.000722629	0.00126097	0.00071413
9.6315e-06	0.000983096	3.44347e-05	0.000818527	0.000402544	4.94236e-05	0.000110029	0.00254339	0.00212463	2.78757e-05	4.58307e-06	0.0005601	0.000820616	0.0001457	0.000397393	0.000208966	0.000367574	0.000454881	0.00126957	0.000837936	8.48553e-05	0.000629519	0.00184617	0.00213221	1.00497e-05	2.3401e-05	0.000947989	0.000417664	0.000399887	0.0014408	0.00128144	0.00258991	0.00033141	0.000253732	0.00230688	0.00317108	0.00194697	0.000669751	0.000857519	0.000289923	0.00152582	8.59239e-06	0.000126778	0.00418171	0.00183756	0.00972357	0.00420493	9.70855e-05	0.00371141	8.66788e-05
8.13827e-05	0.000199579	1.64477e-05	4.60102e-07	0.000101666	7.30932e-05	6.21613e-05	2.7801e-05	7.21045e-05	8.1844e-05	5.85112e-06	0.0001512	1.98281e-07	7.67092e-05	0.000790875	0.00143983	1.38157e-06	0.000215693	0.000493598	2.468e-05	7.45292e-05	9.86672e-06	0.000642485	0.000279695	4.27693e-05	0.000282364	7.74131e-05	0.00018554	0.000171761	0.000947536	4.66303e-05	0.000188427	0.000548492	0.000254601	0.000544719	1.6882e-07	7.71458e-05	0.000271207	0.000524811	8.60064e-06	0.000127378	0.000988855	7.56717e-05	0.000145888	0.00122207	0.000523811	3.09207e-05	8.68007e-06	2.73051e-06	0.000551941
0.00090064	1.67385e-05	0.000429214	4.86487e-05	0.000242751	7.99258e-06	2.16809e-05	0.000241948	3.21498e-05	0.000889938	0.000530343	0.000178422	0.000377377	1.72103e-05	0.000209465	9.54502e-05	0.000439562	5.94899e-05	0.000677889	4.0745e-05	0.000359776	9.23465e-06	0.00118065	0.00056813	0.000492576	0.000201432	0.000183527	1.47191e-05	2.85068e-06	0.00024185	0.000449605	0.000542492	0.000525202	0.000249685	0.000115889	0.00092553	0.000170944	0.000949656	0.000985269	0.00028262	0.000321481	0.000403418	0.00138989	5.8735e-05	0.00187522	0.00168829	0.000517125	0.000727018	0.000282026	0.000688265
0.000147682	3.21381e-05	1.29498e-05	0.000110596	0.000295609	1.37293e-07	2.94583e-07	2.81205e-05	5.30235e-05	2.64987e-05	0.000314236	8.3671e-06	0.000191198	0.000242167	3.91899e-05	0.000368992	0.00155178	2.82047e-07	0.00014291	0.000201336	0.000374948	9.75387e-05	5.49746e-06	0.000119532	0.000517365	7.55088e-05	1.49521e-05	0.000348383	5.25281e-05	0.000199901	0.000128676	0.000473833	7.43709e-05	0.000534188	0.00103768	0.00204871	0.000591056	0.00068805	0.000205916	0.000204503	0.000915945	0.000296501	8.49072e-05	5.58821e-06	1.18451e-05	0.00132105	0.00279374	0.00107037	0.00234591	0.000660102
2.42868e-05	3.02072e-07	0.000565059	3.63481e-06	8.47935e-05	8.2506e-05	4.14053e-05	2.57643e-06	0.000424644	9.36133e-05	1.14457e-06	4.49097e-06	4.61016e-05	0.00024674	0.000452644	0.000259246	0.00010708	0.000101223	0.000332541	1.17048e-05	2.57748e-05	0.000677283	0.000856249	0.000741331	0.00100129	0.000149376	0.00115072	0.000924448	9.71375e-05	0.000386279	7.02581e-06	0.000460538	0.000244692	0.00115318	5.85593e-06	0.000544378	0.000603226	0.000560003	0.000136467	0.000462304	0.000474728	0.000120839	0.000104642	0.000263954	0.00100448	0.00280549	0.00123716	9.4601e-07	0.000147598	0.00121558
0.000392873	3.04479e-05	5.54239e-05	7.88603e-05	0.000429818	3.95078e-05	0.000801229	1.52477e-05	5.00314e-06	0.000453663	7.00029e-05	1.01324e-06	1.99026e-05	0.000112305	5.07538e-05	0.000237859	2.09543e-06	0.000713295	0.000330239	9.23166e-05	4.12785e-06	0.000908412	0.00019758	0.000203399	0.00057943	0.000103672	0.000359146	8.05252e-05	0.000835768	1.34212e-05	4.09085e-05	0.000492782	0.000257618	6.64927e-05	3.4723e-06	0.000398254	4.96641e-05	0.00107661	0.0010822	5.10292e-06	0.000544408	0.00106885	0.000388705	0.000927528	0.000216745	0.00233862	0.000389152	0.000188457	0.000499798	0.00103609
0.000109703	8.44764e-06	0.000307107	0.000179885	5.58461e-05	1.75779e-06	0.000192801	0.000202846	0.000511154	9.79943e-05	9.44489e-05	5.04951e-05	0.000394277	1.66457e-06	0.000248714	9.44764e-05	0.00168883	1.19634e-06	0.000175308	0.000140416	0.00105397	6.47241e-06	6.59916e-05	0.000345824	0.000386615	9.90333e-05	0.00028634	0.000780392	6.74826e-05	0.000195908	1.20947e-07	1.93609e-05	9.75128e-05	0.00137811	0.000125201	0.00022391	0.00074841	0.00166034	5.90071e-05	0.00120655	0.000486103	0.000988897	0.000254085	0.000921031	8.59417e-06	0.00281305	0.00291	0.000178076	0.00101764	0.000792449
2.26491e-06	8.01559e-05	0.000484685	1.05127e-05	2.41853e-05	1.62499e-05	2.43039e-06	4.64687e-07	0.000121554	0.000612167	0.000130018	9.75959e-05	0.00028672	2.49404e-06	0.000711482	4.33651e-05	3.87426e-05	0.000271857	9.15538e-05	2.0739e-06	7.75925e-05	0.000229364	0.000830641	0.000479247	0.00162374	0.00048317	8.00214e-05	0.000453523	0.000224101	0.000340018	4.72837e-05	0.000407274	0.00125258	0.00077806	2.31332e-05	0.000968421	0.000437099	0.00132213	1.13552e-07	0.000439971	2.92259e-06	0.00158463	8.43516e-06	0.000685661	0.00345331	0.000973563	0.000432334	0.000549941	0.000317127	0.00245819
8.84897e-05	2.70459e-06	8.51559e-05	2.80883e-05	0.000183205	3.8486e-05	7.38298e-05	1.93172e-06	6.45753e-06	5.20089e-06	1.24736e-05	3.55518e-05	0.000178967	4.82987e-06	0.000222796	4.67289e-05	1.08911e-05	1.40634e-06	0.000184073	5.26452e-06	0.000343643	3.23508e-05	9.52924e-05	0.000397851	0.000232781	1.24223e-05	0.000459408	5.59118e-05	4.03632e-05	0.000212098	5.73599e-05	0.000230976	0.000566674	0.000254815	0.000191563	0.000445024	4.54812e-05	0.000172545	0.000963504	2.74621e-05	0.000640879	0.00126312	0.000163093	0.000732883	0.000214895	0.00156716	0.000405728	7.89442e-05	0.000387544	0.000304028
6.13188e-12	6.63581e-05	1.45893e-05	1.57963e-05	8.62545e-05	0.000106313	0.000180609	0.000355875	3.84236e-06	0.000274753	4.19861e-05	2.92366e-05	9.92674e-05	0.000126398	0.000208208	8.02617e-05	2.46164e-07	9.43534e-05	5.07955e-06	0.000133484	3.99932e-05	7.67723e-06	2.92296e-06	8.84952e-05	0.000672041	0.000116698	0.0005967	2.18222e-06	0.00012864	0.000178957	0.00143121	0.000530551	0.000339004	0.000372575	0.000173631	0.00073556	0.000317063	2.20645e-06	0.00045062	0.000730303	0.000530348	0.000284047	0.00119263	6.55536e-05	0.000106636	3.4883e-05	0.000133383	4.5413e-05	0.000912449	0.000746392
0.000357216	0.000175026	0.000543034	7.69532e-09	0.000359142	0.000240017	2.60785e-05	0.000357601	0.000394923	0.000540949	3.46037e-06	2.30404e-05	9.65585e-06	6.2848e-06	1.77259e-05	7.22084e-05	0.000215138	0.000112782	0.000903675	7.82896e-05	0.00066524	0.00014319	0.000187375	9.51927e-06	0.00069722	0.000255559	0.000169794	5.78118e-05	2.58166e-05	0.0021435	0.000358163	0.00280851	0.0011777	7.232e-05	0.000134091	0.00171267	0.000890925	0.00021542	0.00110313	6.72227e-05	0.000590226	0.00119496	5.29344e-05	8.77697e-07	0.000139568	5.64948e-05	6.00423e-06	1.11589e-05	0.00186633	0.00137078
3.17763e-05	0.000238499	3.40915e-05	4.17884e-05	0.000285621	9.24078e-06	1.01538e-05	6.03216e-05	9.68836e-05	0.000406223	7.6892e-05	3.74573e-06	9.89747e-05	0.000184491	1.32495e-05	6.88265e-05	9.67294e-05	3.53334e-05	8.47255e-05	4.31859e-05	1.58897e-10	2.12142e-05	6.37064e-05	7.11235e-05	0.000245194	3.07127e-05	6.10451e-06	5.9638e-07	0.0001535	0.000285411	0.000131115	0.000424627	0.000353533	0.00018617	0.000213691	0.00120907	0.000735231	3.82968e-05	0.00033783	8.72712e-05	6.61244e-05	0.00035347	9.98387e-05	4.78181e-06	3.97891e-06	8.46899e-05	5.9777e-05	2.48123e-05	0.000405862	0.000544236
0.000121327	0.000140913	0.000194521	1.26569e-05	4.33635e-08	0.000158265	0.000113318	7.88013e-05	4.45946e-05	2.25274e-08	0.000836506	0.000171658	5.07228e-05	1.42867e-08	0.000555714	0.000691881	2.87414e-05	0.000148309	0.000274074	4.27637e-05	0.000445406	0.000115998	0.0016027	0.00177263	0.000703188	0.000883477	0.000197999	2.80189e-06	9.63736e-05	0.000305975	2.31184e-05	0.000921825	0.000250093	0.00216316	0.000808245	0.000435127	0.00297705	0.00150835	7.61533e-05	0.00101672	0.000264653	0.00107532	1.36897e-06	0.00291145	0.00218565	0.00319073	0.000908871	0.00142934	7.04702e-05	0.00154082
0.000181335	6.40209e-05	0.000236332	0.000375102	0.000159485	7.01139e-07	7.56042e-07	3.9069e-05	0.000220314	0.000579132	7.05067e-06	0.000609572	1.0064e-06	0.000678387	6.85926e-06	0.000152021	0.000586903	0.00029238	0.000264958	1.61344e-05	0.00102155	0.000194592	0.000397447	0.000344853	0.00186673	0.000309539	0.00203532	0.000243593	0.000500847	1.28905e-05	0.000365308	0.000792203	0.0001173	0.00139864	0.00025546	0.00067108	9.61371e-05	0.00138121	0.000752277	5.41486e-05	0.00103124	0.000501085	0.000170463	0.00478378	0.00151781	0.00220491	0.00148338	0.00087986	0.000482198	0.00344332
8.30096e-05	4.43734e-05	0.000144857	0.000157275	0.000110159	1.21862e-05	0.000162378	7.90671e-06	3.23506e-05	0.000395645	0.00058489	6.29851e-05	2.38353e-05	6.13593e-07	0.00112553	5.03651e-05	0.000316974	5.64429e-05	0.000930167	0.000145321	0.00101443	0.000237329	0.00039844	0.000379782	0.000715354	3.96439e-05	8.10885e-05	0.000411566	0.000534511	0.000638404	0.000502252	3.24456e-05	0.000433481	0.00033802	0.000625193	1.90453e-05	0.002246	0.00187109	0.00102889	1.89986e-06	0.00133817	0.00105632	0.00220221	0.000792185	0.0016964	0.00468853	0.00323937	0.00132608	9.35931e-05	0.000958011
0.000154103	0.000299052	0.000582949	8.93852e-05	0.000127583	4.13579e-06	1.74012e-05	2.33084e-05	1.77966e-05	0.00035525	0.000411482	3.67717e-07	2.89754e-06	0.000548315	9.03088e-05	1.07937e-05	0.000202337	0.000541975	0.000872973	2.77607e-06	0.00312721	0.000869884	4.02231e-05	0.000567651	0.00147908	6.49557e-10	0.00166102	0.000271656	1.51035e-06	0.00153068	0.00111905	0.0016183	0.000741854	0.00143343	0.000929095	0.000349896	6.10153e-05	0.000494361	0.00228279	8.51282e-06	0.000949276	0.0004347	0.000169992	0.00139101	0.00012719	0.00117146	0.000739446	2.91615e-05	0.00190625	0.00327053
0.000292742	1.10324e-06	0.000276548	8.17898e-05	0.00010043	2.78802e-05	0.000140503	0.000592391	0.000277519	0.000373494	0.000112082	0.00152581	1.54289e-05	0.00011559	0.000222121	0.000444412	0.00186931	0.000350763	0.00103036	0.000632788	0.00126774	0.000345477	0.00021859	0.000208952	0.0016889	8.78286e-06	9.40572e-05	0.000117818	0.000311471	0.00025282	8.33707e-06	0.00018689	5.38519e-05	5.09257e-05	0.000790795	0.00144448	0.000273865	0.00158993	0.000674759	3.16245e-05	0.00126351	0.00261649	3.76202e-05	0.000249869	0.000338341	0.00380167	0.000710618	0.000936561	0.0017456	0.00258706
0.000361806	1.34995e-05	0.000597844	8.84128e-05	0.00011669	0.000267536	1.23854e-05	0.000112767	3.31591e-05	0.000552793	0.00414759	7.1261e-05	5.19339e-05	0.000840009	0.000623898	0.000321515	5.20308e-06	0.00119466	0.00125322	0.00132425	0.000738568	4.15954e-05	0.00366945	0.00623428	0.000209756	0.000834205	0.000131062	0.00220658	7.91599e-08	0.000148788	0.00179753	5.85903e-05	0.000335644	0.000112715	0.000213874	0.000253439	0.00482121	0.00311622	0.000277678	0.000455868	9.64792e-06	0.000235538	0.00400953	0.000623968	0.00382504	0.00792118	0.000876803	2.82712e-06	0.000427861	0.000296533
0.00013392	9.58107e-05	7.56465e-08	0.000231235	0.000139107	0.000170814	0.000131312	0.000142105	8.83048e-05	0.000132994	6.60654e-05	1.34462e-06	0.000438084	0.000634183	0.000156996	0.00079568	0.000317634	1.01193e-05	0.000125541	1.30408e-05	3.00906e-05	0.000130497	0.000105661	0.000898174	0.000140258	0.000520143	3.64856e-05	8.40383e-05	2.67142e-05	3.53199e-05	0.000821202	0.000281536	0.00117739	0.000474382	0.000445707	0.00138238	0.000352946	5.08465e-05	0.00106574	0.000645865	0.000363404	0.00036899	0.00123686	5.11916e-05	0.000252628	0.000833116	0.000447936	0.000796815	0.000439561	2.88668e-07
0.000466899	5.57266e-06	6.00568e-05	0.000191776	0.000121454	1.90826e-05	4.38113e-05	2.58635e-06	7.57724e-05	0.000226916	0.000116193	1.45624e-05	0.000579584	0.000405384	0.000214952	0.000106695	0.000346659	1.74091e-09	0.000188956	0.000335639	2.73298e-05	0.00146645	0.000205134	0.000127846	0.00107927	5.44899e-07	0.000286921	0.000456852	0.000235534	5.09298e-05	0.000301846	0.00105161	0.00120457	0.000459875	0.00012804	0.00180548	0.000112463	0.0019143	0.00192872	0.000430844	0.00191742	0.00133832	2.7633e-05	0.00112862	0.000617117	0.000770192	0.000519612	0.000664345	0.000990961	0.00251954
0.000371383	2.28875e-05	0.00027991	3.54203e-06	5.32403e-06	4.24096e-05	8.74492e-05	0.000534744	4.08552e-05	0.000409676	0.000407352	4.12364e-08	3.21538e-05	3.69508e-05	0.000897274	0.000523695	0.000324908	6.79828e-05	0.000424718	0.000820057	0.00167131	1.19624e-05	0.000499788	1.70074e-05	0.000474452	0.000522622	1.53789e-06	0.00081114	5.45962e-05	0.000687742	1.33846e-07	0.00211742	0.00033179	0.000259738	3.61632e-05	0.00332267	1.63121e-05	0.00108426	0.00121744	6.36912e-05	0.00070909	0.00255097	0.00209382	0.000265091	0.000445672	0.00251431	0.000498255	0.00130651	0.000648793	0.00139259
0.000493485	0.000268387	0.000110059	0.000137688	0.000412782	0.000252102	0.000275577	0.0004184	0.00016147	0.00139933	0.000137677	0.000215298	0.000588511	0.000362076	1.37712e-05	4.81371e-05	0.00103531	0.000107554	2.34735e-06	0.00030644	0.0016917	3.3139e-05	9.39111e-05	0.000174126	0.00111632	7.71964e-08	3.74203e-06	0.000322283	0.000630327	0.000168496	0.000158353	0.00170339	0.00167702	0.000211774	8.12323e-05	0.00262932	0.000641689	0.00125972	0.000715542	1.7049e-05	0.000806486	0.00192421	3.54545e-06	1.30664e-05	0.000948403	0.000171909	7.37064e-05	0.00127755	0.00193948	0.00402329
0.000317526	2.71739e-05	0.000115195	5.43585e-05	0.000507603	5.39229e-06	0.000385429	0.000195434	1.82622e-05	0.000675217	0.000585864	0.000677974	7.85475e-05	0.000738864	4.68612e-05	0.000103088	0.000961526	0.000398994	0.000306757	0.000226644	0.000431041	0.000635603	0.000146244	8.02064e-05	0.0019675	0.000760177	0.000413184	0.00173087	0.000373788	0.000194257	0.0023657	0.00124609	0.000275522	0.000849433	0.0068602	0.00408791	0.00458471	0.00286051	0.00126512	0.00160647	0.00383305	0.000984546	0.00281411	0.00527302	0.0009691	0.00385482	0.00379127	0.00296331	0.00455084	0.00649557
0.000130189	6.63499e-06	0.000516233	8.27454e-06	2.11885e-05	0.000665057	0.00032131	0.000923003	0.00119944	0.000928607	0.000731278	0.000121479	0.000274031	0.000487054	0.00120265	0.00102072	0.000142295	0.000591163	0.00217399	0.00235779	0.000737232	3.5565e-06	0.00587471	0.00519564	0.000467641	0.000655715	0.00404177	0.00205662	0.00216421	0.000818864	0.000342885	0.000161272	0.00109584	0.00132647	0.00317641	0.00018735	2.48529e-05	0.0049826	0.00079718	6.65725e-05	8.01572e-05	0.00116875	3.81251e-06	0.00627754	0.00952509	0.00386691	0.00306827	0.00201308	0.000369964	0.00150282
0.000324728	0.000150464	0.000238707	8.09738e-06	0.000117837	3.05578e-05	0.000232505	4.1343e-05	5.34202e-05	0.000273789	0.00334755	0.000110653	1.68266e-06	0.000115559	0.000687729	0.000912568	0.00109286	7.49162e-05	0.00129656	1.84206e-05	0.000625737	0.000446437	0.00141181	0.00163721	0.000462866	0.000442903	0.000777138	0.00190832	5.07169e-05	1.18823e-05	0.000111619	0.000615427	0.000710774	0.00118548	0.000799774	0.000285196	0.00942576	0.00630518	0.00223584	0.00225511	0.000600475	0.00292018	0.000742639	0.00129206	0.00107694	0.00882543	0.0041148	0.0057178	1.97948e-05	0.000478804
[truncated: 125 more columns]

## Sheet: Fig1d_spontFN
0	1.38662e-05	6.84316e-05	0.000107145	1.02449e-07	5.87208e-05	5.26056e-05	0.000160469	5.27863e-06	0.00063907	4.13113e-05	1.84693e-05	0.000505977	3.21653e-05	0.000133666	0.000141817	1.5246e-05	0.000201744	0.00010488	9.69488e-05	0.000322517	7.94581e-06	2.02289e-05	9.41968e-05	2.48819e-07	0.000466232	3.84662e-05	8.47367e-05	0.000924946	9.58768e-07	6.50235e-06	1.00991e-07	0.000249772	0.000130767	7.87073e-05	0.000415021	1.40962e-09	3.58285e-08	0.000145123	5.3958e-06	9.73187e-08	0.000116035	9.41292e-06	9.22087e-06	7.02475e-05	2.57005e-05	0.000799038	0.000834416	5.02344e-05	9.8115e-05
2.87559e-05	0	2.12457e-05	6.65847e-05	5.34711e-05	1.04945e-05	8.33573e-05	4.08935e-05	6.18376e-07	8.87806e-05	8.89255e-05	4.17874e-05	6.03305e-05	3.11579e-06	5.15541e-06	0.000134083	5.29009e-07	4.62021e-06	7.57246e-06	0.000129296	8.03845e-05	6.28188e-06	0.000106814	0.000251666	0.000236115	8.32046e-06	2.24826e-06	9.36043e-05	0.000190061	0.000191997	0.000178001	6.26595e-06	0.000107007	1.50979e-05	4.94288e-05	7.15252e-05	0.000179628	0.000145943	2.47376e-06	0.000344788	0.000198142	6.08302e-06	0.000142632	7.06915e-05	0.000223088	0.000172622	9.57813e-06	1.88689e-07	0.000465278	3.57607e-06
0.000150044	2.48904e-05	0	0.00036253	9.48239e-06	3.90272e-07	4.08265e-05	1.13421e-05	4.95794e-05	0.000320006	0.000299953	7.21917e-06	0.00029407	7.91043e-05	9.60288e-05	1.59795e-05	6.73276e-05	0.000109523	1.14395e-05	2.77223e-05	1.61262e-05	6.78106e-07	0.000188078	6.45316e-05	1.8051e-05	2.44008e-06	1.26677e-05	6.75529e-06	2.51182e-05	4.81951e-05	6.95157e-06	1.14395e-05	5.50454e-05	4.18526e-06	0.000201407	0.000100375	0.000157024	0.000219653	7.20059e-05	0.00021276	0.000100343	7.3854e-05	0.000153216	0.000294041	0.000342526	0.000202814	4.29522e-05	3.02812e-05	0.000773705	2.19855e-05
0.000147823	8.41431e-05	0.000296091	0	1.19739e-06	0.000458714	0.000159558	5.82486e-05	1.33038e-06	6.28929e-08	7.28249e-05	0.000201425	0.000135458	3.46723e-05	0.000565711	0.000373002	5.61788e-06	0.000252526	8.0137e-07	5.01177e-05	4.32157e-06	5.6276e-05	0.000157765	0.000490183	4.10568e-05	0.000467672	2.42585e-05	0.000205657	0.000685922	0.000642866	0.000241564	2.21964e-05	0.000397982	9.80477e-07	0.000511097	0.000173797	0.000543188	0.000210999	3.82942e-05	0.000687681	0.000431068	0.000627978	0.000785671	5.51378e-05	0.000802983	0.00113676	0.00036332	0.000460115	0.0016853	1.6937e-06
1.68728e-08	5.40347e-05	1.81356e-05	4.19936e-06	0	8.32417e-05	0.000110539	4.18147e-05	1.6647e-05	5.26531e-05	0.000160843	0.000355069	6.77348e-07	1.97302e-05	8.49021e-06	6.80493e-10	0.000319329	0.000229627	4.81242e-05	0.000143869	7.56708e-07	3.22709e-05	9.27127e-05	8.8137e-05	4.95965e-06	0.00014177	1.2379e-06	0.000175868	9.60549e-05	0.000483045	1.01636e-05	2.31053e-07	1.98025e-08	0.000297279	0.000366793	0.000135861	6.27643e-05	8.95068e-05	2.87775e-05	0.000807472	3.37673e-05	0.00010739	0.000118607	0.000701759	3.82279e-06	0.000253585	0.000583615	4.00794e-05	0.000388332	0.000486468
0.000216507	3.35479e-06	6.77758e-09	0.000486394	8.1502e-05	0	4.59499e-05	4.47427e-05	1.10788e-09	0.000566839	5.4613e-07	0.000223098	1.12699e-05	2.27967e-06	0.000370154	0.000169895	7.64891e-05	6.93068e-05	4.63382e-06	1.81126e-06	6.93328e-05	6.07753e-05	8.43553e-06	0.000144666	9.60155e-06	0.000598397	6.45183e-05	5.63391e-05	0.000540638	0.000118279	0.000687891	6.047e-07	0.000319913	2.24938e-08	0.000249262	0.000244709	1.87592e-05	0.000134347	0.00016633	0.000678302	0.000241017	0.000845367	0.000883342	9.57248e-07	5.61737e-05	0.00116002	0.000642234	0.000781154	0.000418988	1.9815e-06
4.41424e-05	7.55386e-05	6.66868e-05	0.000194942	9.95699e-05	2.70258e-05	0	2.16161e-05	5.78355e-05	0.000142709	3.33377e-05	4.34415e-06	3.28277e-05	5.83746e-05	4.62152e-05	0.000150903	2.67576e-05	4.01632e-05	5.79242e-06	8.49886e-05	0.000252973	3.4037e-05	0.000208243	0.000627608	4.03003e-05	0.000122419	2.81614e-05	0.000251021	3.26934e-05	0.000548857	7.29869e-05	4.99372e-06	0.000239958	7.79498e-06	1.54714e-05	0.000199591	0.000239258	0.000284448	1.11129e-05	0.000367385	0.000370287	0.000622551	0.000141942	0.000185096	0.000412679	0.000456403	0.000365563	0.000196953	0.00109366	2.34201e-05
0.000222579	6.88243e-05	1.08078e-05	4.50856e-05	1.698e-05	6.20455e-05	1.54313e-05	0	0.000251656	0.000158695	0.000145462	1.87602e-05	6.96266e-07	7.69597e-05	0.00012292	3.12936e-05	1.88636e-05	0.000112598	6.22997e-06	2.79785e-05	4.38726e-05	1.74855e-06	0.000451968	0.000326338	0.000102874	1.27306e-06	1.61053e-05	0.000156967	0.000844807	0.000552959	1.35139e-05	1.5525e-07	0.000173879	0.000516916	0.000120288	0.000851042	9.94613e-06	7.98557e-05	5.34087e-06	0.000180853	5.19225e-05	5.6909e-06	1.27688e-05	0.000282027	0.000221296	6.39032e-05	2.58587e-06	0.000205173	4.98418e-05	1.93051e-05
7.48339e-06	6.91976e-06	3.85699e-05	8.39712e-06	4.52927e-06	2.98173e-05	4.15587e-05	0.000213111	0	2.30848e-06	0.000151794	0.000168841	6.98334e-06	3.54228e-05	8.40188e-05	5.8772e-06	0.000128262	2.52416e-06	1.39072e-05	3.44379e-07	0.000530819	7.42684e-05	5.10057e-05	2.58955e-05	7.70108e-07	4.66616e-06	1.65482e-06	0.000169753	0.000702259	8.62704e-06	2.20188e-05	7.19093e-05	5.29995e-07	2.29036e-06	0.00020253	0.000279218	0.000128657	0.000110712	6.84295e-05	7.47627e-06	6.71941e-06	0.000201433	0.000277485	8.28103e-05	0.000278951	2.8252e-06	0.000206226	2.65287e-06	6.38508e-05	3.19586e-09
0.000761107	4.59819e-05	0.000262729	3.13486e-07	2.69107e-05	0.000552014	0.000122539	0.000148088	6.19891e-06	0	0.00070028	0.000339967	0.000476983	0.000202203	0.000518847	8.08295e-05	9.51031e-06	2.58265e-06	0.000209115	7.20761e-05	0.00107743	4.10263e-07	0.00111897	0.0002978	0.000110504	0.000137199	0.00064394	0.00021328	0.00365628	4.19421e-07	6.55023e-05	1.06014e-05	9.3221e-05	0.00111547	0.000811797	0.000320524	0.000538024	0.00206291	4.67256e-06	0.000467337	0.000895711	2.36342e-05	9.10138e-07	0.00153432	0.0004232	4.12728e-05	0.000167913	0.000916116	0.00512111	1.1775e-05
9.76826e-06	4.17125e-05	0.00027782	0.000105003	0.000144936	8.9207e-07	6.81101e-05	0.000175374	0.000229231	0.000647101	0	8.29285e-05	0.000447485	0.00130465	6.9648e-05	5.90952e-08	5.81812e-05	0.000876603	0.000136337	0.000263507	0.000119736	0.000216011	0.000165751	0.000116901	7.85368e-05	4.5474e-05	8.6562e-05	5.38499e-05	3.38876e-06	3.69718e-06	0.000506145	8.92173e-06	8.77583e-05	1.95838e-05	0.000257556	0.000231171	0.000947301	4.01508e-05	0.000409364	0.000157122	0.000121681	0.000512386	0.000456756	0.000223088	0.000773323	0.000191434	0.000218085	0.000480624	0.000191613	6.08427e-05
1.13409e-05	3.2689e-05	1.4354e-06	0.000265723	0.00042018	0.000188152	2.14668e-06	1.64039e-05	0.000169135	0.000373932	2.7399e-05	0	6.61758e-05	0.00011641	0.000620696	7.56112e-05	5.32162e-05	1.4174e-05	3.56398e-06	1.20172e-05	0.000275402	1.98074e-05	0.000107262	0.000172485	6.631e-06	0.000376596	0.000779361	1.87589e-05	0.000936231	0.00372583	0.00012607	3.724e-06	0.000722441	1.03334e-07	0.000104511	8.99669e-05	0.000555115	0.000185272	8.23526e-05	0.000309422	5.56782e-05	3.92376e-05	8.21838e-05	0.00088363	1.40602e-05	0.000314005	1.16025e-05	0.00141711	0.000385857	0.000256975
0.000536306	6.6192e-05	0.000272239	0.000213159	1.37076e-06	6.77215e-05	1.52348e-05	6.33115e-06	4.24932e-07	0.000663906	0.000316795	5.18838e-05	0	1.52567e-05	0.000122084	4.087e-07	3.40728e-06	4.53511e-07	1.77925e-06	2.15326e-05	2.8632e-05	5.16782e-05	3.01296e-07	5.57047e-06	4.0839e-05	4.8374e-06	7.16877e-07	1.26403e-05	4.9984e-05	0.000371307	2.12891e-05	5.52661e-05	8.03657e-06	3.09498e-05	0.00096431	0.000526276	0.000753561	1.37126e-05	8.18993e-05	7.13253e-08	0.000139281	0.000613258	0.000192861	0.000539058	0.0015591	0.000743066	0.000368444	7.52609e-05	8.61314e-05	0.000177343
3.54843e-05	2.73497e-07	7.48245e-05	3.56792e-05	6.73453e-06	1.36694e-06	5.10555e-05	6.97226e-05	4.42785e-05	0.000109415	0.00150044	0.000119584	5.28965e-06	0	2.03714e-05	0.000134367	0.000159954	5.74163e-05	1.59118e-05	0.000513289	1.2688e-06	4.40976e-05	2.33615e-05	0.000142711	5.7927e-05	0.000119273	0.000128851	0.000589797	0.000238356	0.00014982	0.000610674	0.000246419	0.000111909	0.000247569	1.78703e-05	0.00011875	0.000185223	0.000191548	0.000386844	0.000735076	4.67335e-05	0.00049809	0.000239827	0.00047355	0.000574245	1.74549e-05	0.000231677	0.000108699	0.000483539	1.51753e-05
0.000176966	6.13387e-07	0.000102615	0.00033183	3.01873e-05	0.000251852	3.22536e-05	0.000136355	5.63909e-05	0.000394545	3.35418e-05	0.000401444	0.000121536	1.22262e-05	0	7.22827e-05	6.32701e-05	2.69584e-09	0.000280792	1.30785e-05	0.00010161	7.75851e-05	2.84987e-06	0.00010268	1.43816e-07	0.000843845	0.000161553	7.97111e-06	0.00161658	0.000162209	0.000229475	2.71402e-05	0.000427323	0.000129582	0.000412937	0.000943916	0.000199971	1.26365e-05	2.42862e-05	0.000110989	2.84414e-06	0.000316095	0.000129528	0.000126782	0.000191126	1.34817e-06	1.11376e-06	0.00084413	2.76363e-05	3.83588e-06
0.000163725	0.000104769	7.43429e-06	0.000371386	3.09918e-07	0.000118666	0.000174103	1.18217e-05	2.01453e-05	5.0085e-05	2.26516e-06	0.00011623	7.64517e-06	0.000149989	0.000200777	0	0.000247593	0.000771088	5.31659e-05	1.75237e-05	0.000113229	5.33341e-05	0.000235479	0.000358903	0.000365969	0.00156969	3.99745e-05	0.00194893	1.29699e-06	0.000438846	0.000666656	0.000253849	0.00100346	0.000872265	2.22436e-07	0.00115176	0.000639793	0.00242482	0.000437696	0.00138303	0.000650103	0.000305435	0.00163781	0.000230502	0.000627498	0.00108091	0.000691401	0.00039543	0.0014556	6.15667e-05
6.19203e-06	2.14674e-06	5.58469e-05	4.06736e-06	0.000197544	5.91094e-05	1.78149e-05	6.65953e-07	0.000198454	8.21436e-06	2.65643e-05	5.04598e-05	4.11581e-08	8.62214e-05	3.7993e-05	0.000112778	0	3.56397e-06	0.000117313	0.000569962	0.00489429	0.00105975	9.06364e-06	8.09388e-06	4.32789e-05	0.0001745	0.000463198	0.000793459	0.00183837	0.000137869	0.000371724	0.00160641	0.000168781	0.00145076	1.55742e-05	0.00023669	0.000245506	1.68625e-05	0.000200164	0.000112622	1.80494e-05	0.000100401	0.000107592	0.000119095	0.000123363	0.000309463	6.28122e-06	4.4546e-05	0.000906206	0.000365514
0.000202986	2.04878e-06	0.000104717	0.000234618	0.000176759	1.70618e-05	7.24174e-06	0.000139689	2.44918e-09	2.16774e-05	0.000952544	2.60423e-05	5.98334e-07	0.000112837	4.92633e-06	0.000817718	3.07074e-06	0	7.71082e-07	0.000542253	1.71769e-05	3.12882e-06	3.49081e-05	0.000194733	6.44698e-05	0.00128883	8.02213e-06	0.00178326	7.7138e-05	0.00170318	0.00124562	0.000101119	0.000233245	0.000137275	6.11889e-07	0.000113556	0.000203423	0.000644495	0.000844944	0.00105386	7.46387e-07	0.000222917	0.00126342	0.000853201	0.000463233	0.000324573	0.000429269	9.8047e-05	0.000875686	3.73244e-05
7.78102e-05	8.74817e-07	3.33273e-06	2.41203e-06	8.36595e-05	1.21264e-05	1.79919e-05	1.17742e-07	1.51025e-05	0.000166707	8.76821e-05	6.29978e-09	5.97311e-07	9.60008e-06	0.000407051	5.1129e-05	0.000109515	1.14895e-05	0	0.000163228	5.43291e-05	1.33191e-06	7.5068e-05	4.15009e-06	5.06302e-06	8.97698e-07	3.09292e-05	0.00010464	0.000105488	0.000336651	1.41994e-05	0.000125847	6.41638e-05	1.63899e-05	7.00435e-05	0.000183538	2.87287e-05	1.28933e-05	6.18472e-05	2.96474e-05	1.24552e-05	8.27996e-06	3.11364e-06	2.99485e-06	5.83842e-05	3.56371e-06	2.32512e-05	5.18936e-05	4.04341e-05	7.12902e-05
5.045e-05	0.000139276	2.66237e-05	9.08468e-05	0.000131584	2.84677e-05	0.000135571	5.11502e-05	4.18571e-07	9.61353e-05	0.000186355	2.09451e-05	2.20544e-05	0.000384002	9.86972e-07	2.14368e-08	0.000552028	0.000482168	0.000148346	0	0.000561853	0.000915166	0.000465207	0.000285747	3.31164e-06	1.09171e-05	0.000237242	0.000439464	8.86231e-05	0.000237041	1.91649e-05	0.00021862	1.89249e-05	0.000727247	0.00037609	0.000331671	0.000808575	0.00265048	0.000679671	6.09687e-07	0.000439849	0.000733935	4.03264e-05	9.0974e-05	9.9403e-05	0.00105452	7.12595e-06	0.000368782	0.00115854	0.000267594
0.000273455	6.48432e-05	2.26953e-05	8.68551e-06	9.36442e-07	0.000121866	0.00026778	5.03046e-05	0.000409508	0.000916546	0.000126248	0.000203123	1.25699e-05	7.19028e-06	0.00029271	8.62953e-05	0.00655814	1.83194e-05	5.31393e-05	0.00036535	0	0.000615576	0.000214506	0.000160235	1.15431e-05	4.09704e-07	0.00091265	0.00456244	0.00232649	3.42734e-05	0.000837239	0.000171819	0.000166101	0.000113202	1.72677e-06	0.00179982	4.97243e-05	0.000120044	1.66214e-05	5.9773e-06	0.000345835	0.00155098	7.34242e-05	0.000220646	0.000577053	0.000136165	0.000297324	2.86353e-05	9.01103e-05	5.21841e-06
8.3451e-06	4.58951e-06	6.4208e-07	6.82873e-05	3.78515e-05	9.58609e-05	5.20265e-05	1.18408e-06	0.000100421	1.82743e-07	0.000181634	5.31121e-05	3.80774e-05	4.70481e-05	0.000101227	4.07644e-05	0.00188849	8.79021e-07	1.19183e-06	0.00140068	0.00078408	0	6.65948e-07	8.49135e-05	1.89826e-06	0.00013472	1.55112e-05	0.000495492	1.20543e-05	4.87537e-05	0.000186923	0.000521724	0.000177653	0.00159564	6.33034e-06	0.000126964	0.000427146	6.70719e-05	1.16096e-05	2.44811e-07	0.000243749	0.000847511	8.2766e-05	4.27631e-05	0.000138012	6.01514e-08	1.07322e-06	0.00050537	9.52497e-05	8.37584e-07
9.07685e-07	0.000108932	0.000164961	0.000233375	6.85396e-05	6.80957e-06	0.000164536	0.000629233	8.91311e-05	0.00152324	0.000241648	0.000102588	1.33717e-06	6.04033e-06	1.36661e-07	0.000229037	2.67602e-05	5.86948e-05	9.1177e-05	0.000349126	0.000299137	9.64438e-09	0	0.000496014	0.000240751	3.13753e-07	7.05775e-05	3.18967e-06	5.48521e-05	4.66565e-06	6.12821e-06	4.66808e-06	0.000492318	0.00012346	0.000302226	0.000834582	0.00018012	0.00208246	1.35929e-05	0.000529352	0.000689829	0.000356658	0.000704696	0.000114816	0.00088538	0.000633079	0.000475346	9.10009e-05	0.00221787	2.30912e-05
0.000115481	0.000192894	7.81917e-05	0.000512918	2.02829e-05	0.000103274	0.000548843	0.000251511	8.27676e-05	0.000390388	0.000256685	0.000142501	7.34653e-05	0.000180554	0.000149455	0.00042281	9.80607e-06	0.000219989	1.9283e-05	6.87655e-05	0.000142508	0.000103066	0.000504607	0	0.000212807	0.00018246	1.01845e-05	0.00027085	0.00078196	0.000771458	0.000319056	3.37069e-05	0.000611351	6.21537e-06	0.00033395	0.000978487	0.000523815	0.000500688	0.000553685	0.00101334	0.000580979	0.000792115	0.00121172	0.00017575	0.00104227	0.000788245	0.000433816	0.000260918	0.00242286	4.91133e-06
5.83776e-06	0.00024834	1.4442e-05	3.05686e-05	5.20389e-07	1.07452e-05	4.79004e-05	8.09993e-05	1.93628e-06	8.24933e-05	6.39507e-05	1.43646e-05	5.12579e-05	2.49907e-05	1.23465e-06	0.000390299	6.9343e-05	5.64916e-05	9.17238e-06	3.57924e-06	1.57651e-05	9.59662e-06	0.000284969	0.000195755	0	4.08493e-05	1.34437e-05	0.000210255	6.51631e-06	0.000183864	0.000252649	9.84386e-05	0.000108365	4.70372e-05	9.97243e-05	0.000146439	1.72258e-05	0.000131585	0.000231164	0.000266268	0.00019724	3.14374e-06	0.000323417	8.46302e-05	6.6612e-05	0.000191448	1.45012e-05	2.71497e-08	0.000419008	0.000255596
0.000517627	1.70881e-06	1.58879e-08	0.00046257	0.000150545	0.000549278	3.56104e-05	6.07905e-06	1.35328e-05	0.00020213	2.69522e-05	0.000185335	2.07078e-05	0.000215357	0.000753919	0.00137332	0.000347813	0.00144737	4.70656e-06	3.8065e-05	1.55346e-06	0.00011512	2.94163e-06	7.91978e-05	2.03642e-05	0	3.77085e-05	0.000429816	0.000427944	0.000460585	0.000747542	0.00017056	0.000936574	0.000579569	0.000125473	0.000324262	8.66728e-06	0.000132367	5.49284e-05	0.00070444	0.000265637	0.000444347	0.000610869	0.000173775	0.00045629	0.000541913	0.000870948	0.00303758	0.000673835	3.39093e-07
4.3052e-05	1.54826e-05	9.17435e-09	2.27426e-05	4.14768e-06	3.73125e-05	4.58063e-06	3.13133e-05	1.50101e-06	0.000746449	0.00026475	0.000748018	3.45759e-07	0.000161132	0.000113614	7.41844e-06	0.000607982	4.72237e-06	3.81763e-05	0.000245065	0.000975883	3.03854e-06	0.000169475	4.74647e-05	4.20895e-05	5.19731e-06	0	0.000106665	0.000508399	1.35306e-06	0.000196975	5.18284e-06	5.57838e-05	0.000512197	4.34469e-06	0.000103557	0.000449511	8.31979e-05	4.56152e-06	0.000235694	8.46746e-05	4.15507e-05	0.00031969	0.000276928	4.9296e-05	5.60337e-05	4.83644e-06	1.8529e-06	0.00157498	3.95417e-05
4.22386e-05	9.84056e-05	1.71312e-05	0.000228673	0.0001557	2.82615e-05	0.000308677	9.73551e-05	0.000122115	0.000214081	9.25866e-05	1.42523e-05	1.91847e-05	0.000437952	6.77791e-05	0.00199755	0.00159473	0.00157157	4.94368e-05	0.00028437	0.005691	0.000572014	7.81579e-06	0.0003023	0.000117945	0.000522709	4.42772e-05	0	0.00172071	0.00301916	0.000680891	0.00154555	0.000495717	0.00193978	0.000258403	0.000816541	0.00234651	0.00403343	2.02413e-05	0.000372768	0.000564554	0.000490699	0.000560038	6.70499e-06	3.11468e-05	0.000425715	7.87866e-07	0.000655558	0.00245442	0.00011551
0.00148072	0.000108022	4.32852e-06	0.000544826	7.86617e-05	0.000411514	3.71745e-06	0.00075048	0.000696952	0.00447274	2.75842e-05	0.000653103	1.99867e-05	0.000266237	0.00178996	1.63559e-05	0.00302258	7.82625e-05	0.00012031	7.64133e-05	0.00291842	6.50689e-05	2.04357e-06	0.000588955	2.72994e-05	0.000306692	0.00056251	0.00255694	0	0.000969136	9.07683e-05	0.000828008	0.000152691	6.09975e-05	0.000504268	1.58549e-06	0.000405117	0.000142728	8.05509e-05	0.000276965	1.46122e-05	0.000110591	0.000190824	3.24482e-05	0.000915952	0.00017901	3.69038e-05	0.00100098	0.000371906	0.000421855
1.51538e-06	0.000131001	4.16437e-05	0.000678052	0.000498067	9.5983e-05	0.00038631	0.000644734	3.04889e-06	8.0523e-06	4.53634e-08	0.00345971	0.000479574	0.000162508	0.000291793	0.000578013	0.000118653	0.00156715	0.000264101	0.000155917	5.76939e-05	5.44644e-05	1.43853e-07	0.000951997	0.000118077	0.000732373	4.36681e-05	0.00343255	0.00143141	0	0.00166554	0.000103918	0.000129115	3.2325e-09	3.80289e-05	1.14939e-06	0.00306862	0.000977786	2.05614e-06	0.000172373	0.000812896	0.000226462	0.000192336	0.000258941	0.000678477	0.0013439	4.43409e-05	0.000623807	0.00110451	0.000408238
9.22067e-08	0.000103375	2.68699e-06	0.000193897	3.33984e-08	0.000606444	4.73004e-05	2.92132e-05	1.24332e-06	7.48084e-05	0.000553669	0.000121118	3.48184e-05	0.000698272	0.000347101	0.000663689	0.000519197	0.00121832	2.69058e-05	6.32201e-05	0.000858818	0.000157717	1.30131e-05	0.000354129	0.00022828	0.000656339	0.000323576	0.000832043	0.000210234	0.001355	0	0.000323905	0.000950161	0.000339447	2.95326e-05	0.000187978	0.000105628	2.76454e-06	0.000606642	0.000686717	0.000137509	8.22083e-05	0.0017432	4.1727e-07	0.00077205	0.000899993	7.04615e-06	0.000190483	0.000268259	0.000291566
2.07301e-07	5.84832e-06	1.61702e-05	1.91833e-06	1.07762e-05	6.60359e-06	3.81939e-08	1.94815e-08	7.44687e-05	6.87823e-06	5.03825e-06	2.92602e-07	4.02505e-05	0.000180393	1.30577e-05	0.000261382	0.0015039	7.83406e-05	0.000123415	0.000287083	0.000148854	0.000366962	1.66796e-08	4.22158e-05	6.19986e-05	0.000113727	6.33071e-06	0.00142283	0.000628435	0.000102459	0.000275959	0	0.000142318	0.00126713	8.03275e-06	6.63685e-06	7.02384e-07	0.000196285	0.000229722	2.71824e-05	1.29627e-06	2.35074e-05	5.47823e-06	2.91504e-05	4.35186e-05	4.6643e-05	3.48155e-05	8.22654e-07	2.91444e-06	0.000142783
0.000348072	7.3409e-05	5.23794e-05	0.000426294	1.50418e-05	0.000285	0.000148915	0.000135188	3.67837e-05	6.32941e-05	0.00020725	0.00051699	1.35047e-05	0.000168915	0.00055249	0.000650518	0.000269518	0.000358342	9.03833e-05	8.57446e-05	0.000211566	0.00012228	0.000420861	0.000696168	9.23583e-05	0.00101807	0.000113034	0.000355378	0.000265118	6.25139e-05	0.000902709	0.000167562	0	9.27103e-05	0.000432499	0.00163728	0.000259591	0.000650207	0.000451382	0.000226456	1.80395e-05	0.00120497	0.000912197	0.000397739	0.00109173	0.000695057	0.000814235	0.00181814	0.00191074	7.94849e-06
0.000128522	2.93231e-05	1.99961e-05	6.31422e-07	0.000193024	4.00722e-06	2.17649e-05	0.000400567	1.19657e-07	0.00146089	5.22947e-08	4.52809e-09	2.0142e-05	0.000180662	4.40351e-05	0.000767596	0.00201289	0.000117929	5.68076e-06	0.00045825	1.33082e-05	0.00109366	0.000197903	7.71113e-05	9.73546e-06	0.000568025	0.000623213	0.00160396	1.92049e-05	2.19414e-05	0.000212856	0.00122681	4.84986e-05	0	0.000229131	7.71761e-05	8.8835e-06	2.98556e-05	0.000293051	5.89381e-05	8.97217e-06	7.60547e-06	1.61841e-05	0.000874288	4.95139e-06	0.000150476	0.000218686	0.000268757	0.000840819	0.000265816
9.55017e-05	5.8706e-05	7.16673e-05	0.000331697	0.000173804	0.000257716	1.25061e-05	0.000105131	8.48687e-05	0.000710959	0.000118748	5.57251e-05	0.0010295	2.13368e-05	0.000321892	1.03398e-06	7.02595e-06	1.07507e-08	8.41501e-05	0.000259267	2.78514e-06	6.46068e-06	0.000218121	0.000194687	1.84309e-05	0.000139496	3.74735e-06	0.000353444	0.000612632	2.53091e-05	3.0854e-05	6.61536e-07	0.000518165	0.000275961	0	1.37279e-05	3.47916e-05	0.000199005	0.000470103	9.10383e-05	1.86059e-05	1.27712e-06	1.1552e-06	6.65763e-05	0.000697711	6.00509e-06	1.85417e-06	0.000251629	0.000789427	0.000177046
0.000363489	3.14954e-05	8.41739e-05	0.000208892	0.000151455	0.000235961	0.00016792	0.00057898	0.000199608	0.000121811	0.000296587	6.10707e-05	0.000432873	0.000161053	0.00090619	0.000941716	0.000379843	0.000239381	0.000273342	9.72291e-05	0.0013549	9.87619e-05	0.000528764	0.00077917	0.000106639	0.000273433	2.34243e-05	0.000580064	1.11709e-06	7.44896e-06	0.000144768	3.22397e-06	0.00159786	1.97956e-05	2.06959e-06	0	8.27334e-05	0.00116029	6.1926e-05	0.000121947	0.000269493	0.00107741	0.00167596	2.14135e-05	0.000585076	0.000335485	0.000930157	0.000659826	0.00183348	9.32797e-07
2.68813e-07	0.00013767	0.000154296	0.000605644	3.58142e-05	3.52002e-05	0.000184479	2.2015e-05	0.000165777	0.000708436	0.00121851	0.000259227	0.000849802	0.000124031	0.000199669	0.000523211	0.000143422	0.000100693	1.50203e-05	0.000575383	1.69597e-05	0.000382292	0.000227852	0.00034573	2.35485e-05	2.87958e-05	0.000324895	0.00219804	0.000517694	0.00232736	5.56068e-05	8.77435e-07	0.000281888	1.03638e-05	8.39917e-05	0.000230407	0	0.00537503	0.000496603	0.000997401	0.00115923	0.000633508	0.000391071	0.0026753	0.00151828	0.00175097	9.79283e-06	7.6351e-05	0.00259681	3.83235e-06
1.1306e-05	0.000107178	0.00020218	0.000192312	4.64975e-05	0.00010056	0.000234547	3.74368e-05	0.000172339	0.00181674	5.74793e-05	6.85261e-05	2.18406e-05	0.000175117	1.01407e-05	0.0025984	2.64683e-07	0.000394415	3.50619e-05	0.00150188	0.000173325	7.20575e-05	0.00154973	0.000426679	7.92028e-05	0.000243435	3.43161e-06	0.00359093	5.23704e-06	0.000668822	2.62991e-06	0.000131699	0.000782576	6.19031e-05	0.000150807	0.00143871	0.00499234	0	2.95532e-05	0.000392398	0.00124153	0.000921174	4.45625e-05	0.00209377	0.00177643	0.000762945	0.0012718	0.000102122	0.00268379	3.06953e-05
0.000110131	2.78433e-06	0.000103433	1.73101e-05	1.90001e-05	0.000125846	1.08701e-06	1.89424e-08	5.23806e-05	2.43158e-06	0.000371896	3.5901e-05	0.000109969	0.000411465	2.62234e-06	0.000367047	0.000227721	0.000931655	6.34632e-05	0.000872356	3.85476e-05	2.64476e-06	1.092e-05	0.000646872	0.000261903	8.17937e-05	7.86904e-06	3.9328e-05	0.000172949	2.2214e-05	0.00063281	0.000251689	0.000351666	0.000505387	0.000429594	8.01726e-06	0.000311735	1.88018e-06	0	8.22314e-05	1.89818e-06	6.38842e-07	0.000933519	5.29872e-05	0.000290362	3.51348e-05	8.16217e-05	5.4329e-05	0.000173703	0.000430962
1.45e-05	0.000259499	0.000144649	0.000775119	0.000741862	0.000682523	0.000206031	8.39832e-05	5.39445e-07	0.000474832	0.00045866	0.000287184	2.20963e-05	0.00087081	2.80238e-05	0.00290299	4.05617e-05	0.00124742	9.84337e-05	8.2508e-06	3.33285e-05	3.61325e-06	0.000634661	0.000599263	0.000238916	0.00106027	3.30216e-05	0.000422179	0.000548404	0.000212745	0.000902759	6.94277e-05	0.000160276	0.000109714	7.88023e-05	9.7058e-05	0.00142269	0.000607273	1.31141e-05	0	0.00260191	0.00205517	0.00667761	0.000340179	0.000797495	0.00276209	0.00188698	0.00108449	0.00558344	1.22025e-05
1.45343e-05	0.00018771	9.83661e-05	0.000584958	2.9405e-05	0.000308113	0.000270321	6.09662e-05	8.44241e-06	0.000893511	0.000150372	4.68626e-05	0.000182749	6.72176e-05	1.99326e-05	0.000752338	3.75328e-05	1.53536e-06	2.74649e-05	0.000294754	0.000391361	0.000163086	0.000723888	0.00051242	0.000164737	0.000434167	1.75854e-05	0.000612992	8.5404e-05	0.000778443	0.0002103	1.15013e-07	7.29198e-06	1.16361e-06	3.99481e-06	0.000326959	0.00140424	0.00116003	5.06782e-06	0.00287946	0	0.000637621	0.000498731	7.12949e-05	0.000658112	0.000937099	0.000340255	0.000276126	0.00288628	4.1516e-06
0.000126116	3.3686e-06	0.000118714	0.000691504	0.000174163	0.000964238	0.000590151	5.45435e-07	0.000258165	6.72767e-05	0.000876835	4.89962e-05	0.000363569	0.000554727	0.000465643	0.000339194	0.000189564	0.000325219	4.6984e-06	0.000524585	0.00168279	0.00060082	0.000570971	0.000857219	4.48647e-06	0.000644257	2.70622e-05	0.0003643	0.000262871	0.00013426	6.86061e-05	3.48488e-05	0.00157044	3.52102e-06	2.90479e-05	0.00138967	0.000788078	0.000990556	8.26829e-06	0.00255	0.000742656	0	0.000821254	0.000297176	0.000315846	0.000526901	0.0016814	0.00182928	0.00413593	0.000687189
5.19576e-05	0.000122333	0.000117939	0.000627005	3.80476e-05	0.000638691	8.49795e-05	7.30453e-05	0.000137105	4.64612e-06	0.000501154	0.000161587	5.041e-05	0.000144315	0.000246635	0.00133232	9.55821e-06	0.00106226	8.3835e-06	3.98325e-08	0.000112341	1.27433e-05	0.000476846	0.000799399	0.000257379	0.000676909	1.54174e-05	0.000487363	0.000368159	0.000218206	0.00144911	8.4184e-05	0.000859901	7.11835e-05	1.56241e-05	0.00152725	0.000499071	1.30393e-05	0.000990835	0.00470426	0.000192312	0.000345971	0	0.000244628	0.000264041	0.00114445	0.000789135	2.80174e-05	0.00330624	0.000259149
6.64147e-06	6.40677e-05	0.000296869	6.56538e-05	0.000786363	4.72219e-07	0.000133721	0.000225401	6.7374e-05	0.00149855	0.000181938	0.000685087	0.000554376	0.000503429	0.000106805	0.000220871	0.00013267	0.0007454	4.85785e-07	3.0991e-05	0.000160885	4.98645e-05	9.74825e-05	0.000113094	7.27088e-05	6.59443e-05	0.000149555	2.35323e-06	4.31009e-06	0.000239961	2.75953e-07	2.50551e-05	0.000527408	0.000904265	0.000127065	2.84833e-06	0.00231853	0.00208167	4.59794e-05	0.000239311	7.48933e-05	0.000257216	0.000194546	0	0.000750348	0.000329056	0.000744606	9.02306e-05	0.0011365	7.88816e-06
0.000262542	0.000187652	0.000250245	0.00103615	4.87562e-05	0.000134352	0.000437253	0.000239695	0.000371875	0.000446878	0.00103507	1.12869e-05	0.00155226	0.000767628	0.00059256	0.000895676	0.000477602	0.000566091	0.000155871	1.34203e-05	0.000759123	0.000235057	0.000627256	0.00116979	9.50438e-05	0.00086667	0.000199177	7.38061e-05	0.000912666	0.000484678	0.00102233	0.000225759	0.00137892	0.000134894	0.00103501	0.000958985	0.00122186	0.00175429	0.000603359	0.000516005	0.000584523	0.000310041	0.000551833	0.000636053	0	0.00182656	0.000317227	0.00028496	0.00131261	5.26056e-05
5.71703e-06	0.000119676	0.00018083	0.00107187	0.000254916	0.00134692	0.000412353	0.000116218	2.23804e-05	3.65517e-05	0.000215466	0.00035393	0.000851088	1.85506e-05	5.03252e-05	0.00106854	0.000201756	0.000331167	2.11195e-05	0.000546578	0.000176362	4.77044e-07	0.000639416	0.000715498	0.000163233	0.000725815	8.35881e-09	0.000394849	0.000289945	0.00121921	0.00106669	8.16081e-06	0.000787148	9.81149e-05	2.20057e-05	0.000408857	0.00164496	0.00102396	3.41589e-05	0.00248258	0.000703231	0.00048931	0.00143484	0.000434882	0.00223273	0	0.000539765	0.000117031	0.00504937	3.78333e-07
0.000695317	3.61927e-06	2.01643e-05	0.000302687	0.000504682	0.000527308	0.000295262	5.76903e-06	0.0002392	0.000232403	0.000303282	3.61512e-05	0.000374137	0.0002921	1.9931e-06	0.000899722	2.00291e-05	0.000403438	4.7575e-05	2.69189e-08	0.000234109	1.82246e-05	0.000422104	0.000400799	1.68486e-05	0.00129019	1.91141e-06	1.29918e-05	0.000107924	7.09848e-05	2.64702e-05	3.16191e-05	0.00103207	0.000281251	3.07883e-05	0.000974093	1.01477e-08	0.0015069	0.000119712	0.00211307	0.000279927	0.00156411	0.00138403	0.000896757	0.0002295	0.000467394	0	0.00106872	0.00290425	0.000311022
0.000869408	1.36124e-06	1.61008e-05	0.000463503	3.80303e-05	0.000778047	0.000141338	0.000136999	2.1293e-05	0.00130556	0.000553213	0.000911605	6.88257e-05	0.000115472	0.000988223	0.000260767	3.27676e-05	0.000128789	3.41983e-05	0.000162736	7.28947e-06	0.000383267	8.71265e-05	0.000238828	1.09971e-06	0.003822	3.93489e-06	0.000495965	0.000977628	0.000294354	0.000200442	7.32585e-06	0.00209514	0.000258813	0.0001595	0.00082328	7.50287e-05	2.69777e-05	4.6814e-05	0.00148005	0.000231583	0.00148438	7.20745e-05	0.000132472	0.000136885	8.0085e-05	0.000828799	0	0.00020205	0.000245542
1.34743e-06	0.000400383	0.000641365	0.00189585	0.000265363	0.00044508	0.00101453	9.60683e-05	5.36053e-05	0.00445254	0.000386227	0.000367964	0.000205154	0.00066728	0.00016671	0.0017102	0.000795233	0.00117643	7.24658e-05	0.000654669	0.000127431	5.6642e-05	0.00173197	0.0019557	0.000328444	0.00121477	0.000857131	0.00260849	1.49667e-06	0.00166339	0.00041758	1.63189e-06	0.00217084	0.000544601	0.000925035	0.00217955	0.00288474	0.00351133	9.64993e-05	0.00539169	0.00233053	0.00296394	0.004225	0.00121529	0.00149017	0.00504218	0.00294306	0.000464094	0	5.70162e-05
0.000158396	3.38785e-09	5.93168e-06	4.36392e-06	0.000436126	1.13413e-06	2.80574e-05	3.15414e-06	9.21101e-07	2.11239e-06	3.30209e-05	0.000200927	0.000120222	8.15298e-06	2.01618e-10	3.36505e-05	0.000429237	3.4755e-06	2.9469e-05	0.000218466	3.05782e-08	2.116e-11	2.46604e-05	3.63038e-05	0.000242477	1.96392e-05	4.31652e-05	0.000192361	0.000383571	0.00033361	0.000264466	0.000136217	6.13127e-06	0.00041471	0.000346538	2.16036e-05	1.44327e-06	2.42911e-05	0.000328642	1.85196e-07	1.33532e-06	0.000681103	7.51803e-05	6.62104e-06	8.09226e-07	1.97551e-05	0.000270064	0.000314345	9.6213e-05	0
0.000256001	3.62437e-05	0.000117251	0.000444802	1.39284e-05	7.68019e-05	0.000116684	2.56986e-05	0.000425965	0.000121923	0.000412883	5.78362e-05	0.00380494	1.81794e-05	2.37316e-05	9.19292e-05	0.00043198	0.000530718	0.000119419	0.00015829	0.00175116	0.000323495	8.67228e-06	2.68415e-05	4.55363e-05	0.000410865	0.000280051	0.00104076	9.92925e-05	0.000355955	1.13066e-06	0.00165225	0.00017094	1.44987e-05	0.00179231	0.00161257	0.000682144	5.05654e-05	9.2496e-06	0.000103859	1.0465e-06	1.63568e-06	0.000978153	0.00011486	3.83948e-05	6.70253e-08	0.00103337	0.000343772	9.02539e-05	1.87462e-05
0.000117125	1.62792e-05	1.55285e-05	6.34264e-05	0.000240072	0.000215162	0.000258936	1.64092e-05	0.000119205	1.50882e-06	0.000387321	3.20369e-05	9.34708e-05	0.0010467	1.8619e-07	5.69864e-06	0.000227439	0.000155727	0.000147339	0.000358198	0.00300453	0.000138193	5.88005e-06	2.35732e-05	1.32405e-05	0.000366479	4.58916e-05	0.000393	0.00011473	0.000280235	5.58658e-06	0.000856716	0.00022258	9.97846e-08	4.23342e-05	0.000167192	0.000996853	0.000920078	0.000189568	0.000169506	0.000274724	3.95056e-05	4.16901e-05	0.000216768	8.45343e-05	0.00027057	0.000645222	1.65078e-06	0.000135776	9.73145e-06
0.000497183	0.000190007	3.68549e-05	0.00110556	9.0823e-05	0.00074362	0.000140475	3.50076e-06	2.55995e-05	3.071e-05	6.0948e-05	0.00188467	0.00020923	0.000328258	0.000395507	0.00162515	8.6182e-05	0.00165014	4.84147e-05	0.000292689	0.000896193	0.000322217	0.0008445	0.00235185	4.99202e-05	0.00214144	0.000248746	0.000912762	0.000918439	0.000246641	0.00160405	2.17358e-05	0.0029689	8.66966e-06	0.000115254	0.00292569	0.000720595	0.00241681	0.000173727	0.0034825	0.000998755	0.0027382	0.00471988	1.19907e-06	0.00136082	0.00195961	0.00156573	0.0018474	0.00485433	0.000327461
4.67018e-05	0.000253177	0.000188123	0.000627594	2.55824e-05	0.000208155	0.00025825	4.87564e-05	6.92308e-05	0.00064395	0.000608288	3.40645e-05	0.00021326	0.000662093	0.000214982	0.00143603	0.000160739	0.000663456	0.000151634	4.36484e-05	6.55638e-05	0.000119531	0.000913297	0.00118962	0.000281095	0.00120989	2.78516e-06	0.000372205	0.000452046	0.000241204	0.00079127	0.000194359	0.00164249	5.47088e-05	0.000342692	0.000832662	0.000837601	0.000965616	0.000514042	0.00358974	0.000804273	0.00087647	0.0024885	0.000371387	0.00227301	0.0014595	0.00170841	2.34019e-05	0.00308279	4.73364e-05
5.12731e-07	0.000236663	1.49804e-05	0.000351197	6.91371e-06	0.000284825	0.000193481	0.000335231	2.18645e-05	0.000961695	0.000144544	0.000603854	4.36755e-05	8.37703e-05	2.84733e-06	0.0012124	2.09653e-05	0.000508908	8.97305e-07	0.000435581	0.000100507	3.68142e-05	0.00143553	0.00131582	0.000846589	0.000528772	0.000667964	0.000777113	2.16911e-07	0.00396102	0.000555263	4.04194e-07	0.000619975	8.4471e-05	0.000771863	0.000679892	0.00105258	0.00159748	7.98885e-05	0.00038857	0.0008059	5.50125e-05	0.000798592	0.000148665	0.00045213	0.0010267	5.16451e-06	0.000215706	0.00359197	0.00060289
0.00124988	6.57003e-05	2.75391e-05	0.00186565	3.11031e-06	0.000684242	3.62272e-05	0.000219899	2.59102e-05	0.000180311	0.000197894	0.00041217	0.000618347	1.80231e-05	0.00200433	0.000424507	9.22171e-05	0.000284839	0.000759901	4.3158e-05	4.28089e-05	9.86991e-06	5.6218e-05	0.000232364	2.75905e-05	0.000787767	8.05068e-06	9.51008e-05	0.000726579	0.000938019	0.000407963	7.01414e-05	0.000325298	9.99433e-07	5.43971e-05	0.000270355	0.000441849	6.64356e-09	0.000139413	0.000423057	0.000388048	0.000319392	0.000722493	1.30377e-05	0.000522489	0.00143945	0.000181146	0.000920185	0.00113267	1.94539e-06
0.000443978	3.33247e-05	9.68417e-05	0.000173839	4.44427e-05	9.30663e-06	3.56009e-05	4.22364e-05	0.000305173	9.31781e-05	8.20551e-07	0.000153572	1.83358e-05	2.30838e-05	0.000390275	0.000242344	3.23521e-05	0.000160144	1.18553e-07	2.72378e-07	8.25579e-06	0.000310226	7.68227e-06	0.000140176	8.12068e-06	0.000839469	3.50519e-05	1.05601e-05	0.00118454	0.000206101	6.23883e-05	7.01558e-05	0.000487275	0.000157584	5.23611e-06	3.29967e-05	0.00053945	0.00117054	6.85031e-06	1.89693e-05	0.000296478	0.000200517	9.94535e-06	3.44691e-05	0.000865407	0.000109554	5.73146e-05	0.00117333	0.000198326	0.000292138
0.000949214	2.77552e-05	2.22161e-05	0.00074494	0.000664107	0.00349008	0.000203159	0.000141593	0.000479151	0.000951112	0.000133213	1.63491e-06	5.43694e-05	0.00122514	0.000184038	0.00136556	4.95865e-06	0.00420097	0.000175245	0.000544433	0.000892115	4.31785e-08	0.000134796	0.000215376	9.26708e-05	0.00207697	3.50451e-05	2.31282e-05	3.95551e-06	7.18246e-05	0.00153147	1.59028e-05	0.000595074	0.000374761	2.01001e-05	0.00012641	0.000499419	0.00218901	0.000966287	0.00440691	6.59578e-05	0.00132302	0.00542933	8.46537e-06	3.4782e-05	0.00189106	0.00605294	0.00121005	0.00237999	1.84513e-05
8.23256e-05	0.000163748	0.000640996	0.000364912	5.14621e-07	0.000211628	2.00822e-05	0.000198596	5.72565e-06	0.00153844	0.00156122	0.000257335	0.00143729	0.000465386	1.42133e-05	4.35604e-08	8.09919e-07	6.55446e-07	9.87949e-05	5.87397e-05	1.20058e-06	0.000148667	0.000105585	4.9425e-05	2.62037e-06	5.912e-05	2.10176e-05	1.64942e-06	2.08582e-06	0.000118534	7.10709e-05	5.88464e-05	0.000278288	9.78628e-06	0.000827691	1.58894e-05	0.00130986	0.000115345	1.34155e-05	0.000171283	0.00127234	0.000160765	4.15688e-05	7.77047e-05	0.000168515	0.00068693	0.00148915	0.000282192	0.000743482	1.88847e-06
0.000143831	1.57912e-05	1.43826e-05	0.00010576	5.36235e-07	0.000286225	3.02638e-09	0.000275325	3.4585e-06	0.000466054	0.000181898	9.37569e-07	0.000105472	0.000218439	0.000174981	8.90296e-05	3.85375e-05	0.000348396	2.32178e-05	6.59425e-05	2.25046e-05	0.000125307	1.82773e-06	5.29051e-07	1.39043e-05	0.00116896	0.000460888	0.000219386	0.000232518	0.000425966	0.000378621	6.02747e-06	0.000247449	0.000253502	1.52716e-05	4.14126e-06	0.000361606	6.43801e-06	7.32498e-05	0.000861581	1.66536e-05	0.00234084	1.12149e-05	2.63911e-05	2.8764e-05	7.62101e-05	0.000265491	0.000768964	0.000298554	4.58648e-05
7.67702e-07	0.000335831	0.000225914	0.000696863	6.50373e-06	2.44579e-05	0.000207198	9.00517e-05	4.0199e-05	0.000106162	0.000423937	0.000117299	0.000442009	0.000335512	0.000864663	0.000518756	0.000187283	0.00038607	0.000355824	3.26337e-07	0.000189041	3.77395e-05	0.000412435	0.000540797	0.000154388	0.000359311	3.88735e-05	0.000625929	0.000282026	0.000581156	0.000748128	8.61306e-05	0.000885557	5.27222e-05	0.000140163	0.00218541	0.000700141	0.000522967	0.000290311	0.000936221	0.000332001	0.000211316	0.00121229	0.000324329	0.00145782	0.00150947	0.000121886	0.000128411	0.0016454	0.000115225
6.51016e-05	5.0982e-05	0.000163671	7.54447e-05	0.000105796	1.38647e-05	2.31018e-05	0.00021678	6.57188e-08	0.00654265	1.7549e-05	8.81708e-05	1.47293e-05	3.49361e-05	0.00111748	7.41701e-06	0.000456472	3.99008e-05	5.46023e-05	0.00013092	0.000194075	4.53353e-06	0.000132887	7.78936e-05	3.48435e-05	2.52165e-05	2.7917e-08	0.000288454	4.82095e-05	6.70731e-06	2.95207e-06	3.69055e-06	0.00036628	4.68328e-05	0.000267162	0.00281526	1.82048e-05	1.22105e-05	8.5054e-05	4.8619e-05	8.52042e-05	2.55012e-05	0.000128651	8.78722e-05	5.2768e-06	0.000236004	0.000307775	1.29198e-05	0.00055288	0.000239931
5.31389e-06	4.74657e-05	3.84579e-05	0.000230186	2.05136e-06	0.000206896	0.000174227	3.08612e-05	3.27767e-05	0.000269586	0.000100958	0.000140814	0.000104299	2.9819e-05	0.000258999	0.000401605	1.91405e-05	3.78404e-06	4.40183e-05	0.000120069	0.000718712	6.21323e-05	0.000330021	0.000238154	0.000117696	0.000225633	3.86194e-06	0.000864663	0.000250602	0.000283426	0.000442547	2.01803e-05	0.00062894	2.84773e-05	0.000235007	0.000302072	0.00108221	0.00138073	3.92636e-05	0.000896798	0.000820246	0.000350497	0.000547171	0.000222516	0.00085486	0.000554336	1.3101e-05	0.000154679	0.00111852	4.17807e-05
0.000835766	0.000347306	0.000290419	0.00133746	2.71032e-05	0.00050105	0.000576406	0.000561359	0.00062638	0.00170698	0.0010146	0.000237448	7.15577e-05	0.000793172	0.000348167	0.00190777	0.000197179	0.000939316	0.000139404	4.34906e-05	0.000772089	0.000232861	0.00135584	0.00178627	0.000271931	0.00124207	4.85576e-06	0.00140287	0.000215207	0.00114306	0.000889211	9.65019e-05	0.00195922	2.19509e-06	0.000419907	0.00219596	0.00178282	0.00272008	0.000237909	0.00200711	0.00123001	0.00164536	0.0024725	0.000735613	0.00220452	0.00257598	0.000841656	0.000639936	0.00627155	9.10021e-07
6.4927e-06	9.85555e-05	5.60633e-07	0.000131334	0.000149901	0.000379345	5.18762e-05	5.71342e-05	0.000330639	0.000484958	9.78491e-05	0.000776476	8.30815e-06	0.000154919	0.000143762	0.00113645	0.000229391	0.00213756	2.10744e-05	0.000273168	2.68208e-05	2.50885e-05	4.22078e-07	0.000120971	0.000325948	0.00051147	5.07081e-07	0.00184865	5.15531e-08	0.0106645	0.00248823	0.000349206	1.34495e-06	0.000553662	0.000582201	1.62941e-05	0.000163725	0.000296411	0.00107947	0.000560704	2.06126e-06	0.000253972	0.00231094	0.000778191	8.90669e-09	0.000766634	9.43776e-07	7.80351e-05	0.000245509	0.00106989
7.93516e-06	1.47145e-05	8.1532e-05	3.99765e-05	3.86958e-05	1.01478e-05	0.0001447	0.000195326	0.000472908	0.000923706	0.000759553	0.000116241	6.58721e-05	0.000310124	4.23491e-05	0.000189521	1.19785e-07	0.000149944	7.21776e-05	0.000122566	0.000370871	2.71584e-05	0.00022201	0.00023287	0.000114092	6.62513e-09	0.000138147	0.00182887	0.000105537	0.000814129	0.000122348	6.7134e-05	4.69942e-05	9.73445e-05	0.000134154	0.000445942	0.0015436	0.002436	3.28181e-06	3.62164e-06	0.000511707	0.000264941	3.7538e-05	0.00252934	0.000675598	0.000221122	0.000165161	0.00036565	0.0011573	0.000213337
0.000236165	0.000295213	0.000600365	0.00140354	0.000332919	0.000235371	0.000664881	0.000441894	0.000644447	0.00248233	0.00283056	0.000217067	0.00156321	0.00101793	0.00161329	0.00184665	0.00239863	0.00031653	0.000884712	0.000404213	0.0020314	0.000581598	0.00166686	0.00189553	0.00032449	0.00128922	0.000583974	0.00102024	0.000350359	0.000215229	0.00158938	0.000718569	0.0041012	0.000571056	0.00223956	0.00338244	0.00227845	0.0027491	0.00156127	0.00139563	0.0010444	0.00101104	0.00194388	0.00148918	0.0071127	0.00164302	0.000622717	0.000485769	0.00285065	0.000324997
0.00200941	7.29542e-05	5.86552e-06	0.000312608	1.48911e-05	0.000927887	7.87086e-05	0.000237183	0.000297031	0.000324635	0.000386189	0.00181695	0.00294107	0.000296775	0.00040035	0.00160542	0.00022999	0.00168511	7.66967e-06	0.000121347	0.000211479	0.000355095	3.02483e-05	0.000400375	2.24188e-05	0.00306022	9.34364e-06	0.00328842	1.21382e-05	4.31428e-07	6.00428e-05	6.14901e-05	0.0020748	0.000935777	0.000154569	0.0019377	0.000588823	0.00207218	2.7914e-05	0.000830108	0.000173444	0.0024643	0.000922202	2.60484e-05	0.000111823	8.79614e-06	0.00426659	0.00284033	0.00225435	0.000198522
0.000647915	8.78061e-05	5.2719e-05	0.000372526	8.45452e-07	7.85988e-05	9.29856e-05	0.00010903	0.00144449	2.96967e-05	0.000146021	0.000354679	4.90816e-05	0.000144216	0.000521151	0.000306362	0.000117375	2.12489e-05	1.19436e-05	4.79766e-06	0.000555145	0.000339539	8.05655e-07	9.16138e-05	3.82154e-05	0.00197498	1.73592e-05	0.000566779	6.95502e-06	3.40197e-09	5.01315e-05	1.03789e-06	0.000156308	0.00050149	0.000214197	0.00114196	0.000106707	0.000495916	1.30518e-06	6.25767e-05	0.000665708	0.00148976	1.30259e-05	0.00012884	0.00098858	6.15375e-05	0.000790315	0.00693333	0.000221965	0.000304651
0.000106523	0.000239484	0.000113104	0.000891622	4.89561e-05	0.000443765	0.000328278	0.000478682	5.49663e-07	0.00233257	0.000619781	0.00023584	0.000236322	3.57812e-05	0.000702246	0.0010632	4.00187e-05	0.000152051	0.000195875	0.000860735	0.00112659	9.21897e-05	0.00175192	0.000930324	0.000202541	0.000320387	0.000279156	0.00124961	4.99477e-07	0.000752742	0.000433544	1.87349e-05	0.000704349	0.000856374	9.08649e-06	0.00575705	0.00175535	0.00378959	9.46966e-06	0.00199311	0.00202776	0.00127704	0.00177659	0.000728062	0.00066819	0.00156402	0.000343701	0.000227029	0.00647838	1.20995e-05
3.92385e-05	1.72633e-07	8.5967e-06	0.000317517	4.83374e-06	0.000135871	3.95233e-05	5.63495e-05	0.000121855	7.03032e-07	3.325e-05	3.80339e-05	5.89595e-05	0.000192224	0.000284299	0.000232447	0.000206565	0.000202682	3.75381e-05	1.87929e-06	0.000134331	3.81444e-05	0.000461851	0.00016633	0.000115373	0.000132891	2.22831e-05	1.94232e-05	0.000255566	4.85034e-06	0.00017857	4.2488e-07	0.000483698	5.25239e-06	0.00115854	0.00067234	2.76413e-05	6.14077e-05	0.000135595	0.000223467	3.37955e-05	0.00136445	0.000946671	2.67251e-06	0.000104108	6.61372e-05	0.000187458	0.000191906	0.000793045	3.42401e-05
2.37272e-06	2.69825e-05	3.99839e-10	0.000231212	0.00047526	0.000342988	0.00046868	9.32819e-05	6.71179e-05	2.95956e-09	0.000637793	2.54865e-07	0.000206216	8.98264e-06	1.39338e-05	0.00122308	0.000152748	0.000104329	4.05063e-05	0.000145782	4.85586e-05	2.25572e-05	1.33909e-05	0.000221014	6.4126e-08	0.0014041	9.42063e-05	2.69764e-06	7.28409e-06	0.00150296	0.000951122	2.05716e-05	0.001146	0.000344098	1.57276e-05	3.85688e-06	2.61969e-05	0.000106294	0.000284577	0.00218772	6.01225e-05	0.000250672	0.00160369	9.0511e-05	0.000673135	0.00128332	0.00375132	9.58735e-05	0.00132302	0.000108674
0.000275811	0.000234209	0.000417198	0.00112966	0.000718866	0.000989709	0.000787988	1.28702e-09	0.000121277	2.71697e-05	6.39045e-05	8.01631e-05	0.000125352	0.00136726	0.000207136	0.00141849	3.43091e-05	0.00324569	1.50318e-05	6.18239e-05	4.14238e-05	0.000127056	0.00054039	0.00141671	0.000426238	0.00278376	0.000314918	0.00257262	0.000215367	0.000125052	0.00136387	0.000321875	0.00298899	1.75426e-05	0.00021968	0.00140297	9.19272e-07	0.000256208	0.00206218	0.0064758	0.000517726	0.00583858	0.00788419	0.000314479	0.000155065	0.00231426	0.0031111	0.00275681	0.0113637	3.93991e-05
5.32307e-05	3.48721e-05	1.09861e-05	8.45479e-06	4.27946e-06	3.94076e-06	1.71348e-06	1.80247e-06	0.000552224	5.80037e-07	0.000458545	2.59449e-05	1.5453e-05	0.000977037	0.000234021	1.48839e-07	0.000642303	0.000470701	4.13772e-06	0.00102333	0.000128538	0.000255197	0.000126576	5.06999e-06	1.57819e-07	0.000448562	1.72352e-05	0.000245354	7.84304e-06	0.000835354	0.000449221	0.000268671	3.10452e-05	0.000225316	0.000418975	9.96815e-07	0.000345832	5.55124e-05	0.000301085	0.000526724	8.20396e-06	0.000131578	0.000245167	0.000203336	4.57345e-05	0.000376737	0.000563032	0.000700905	0.000143041	6.26158e-06
7.88931e-05	0.000280233	0.000402402	0.00209917	0.000102954	0.000673868	0.00165523	0.000327138	7.9646e-05	0.00236128	0.000455128	0.000259826	7.30393e-05	0.000660502	0.000553288	0.00251122	2.40218e-05	0.00111888	7.3307e-05	0.000766009	0.00174208	0.000298677	0.00270923	0.0053629	0.000258028	0.00117093	0.000170161	0.00304283	0.000108733	0.00216737	0.00113085	2.79461e-05	0.00309417	0.000251522	0.000943642	0.00500605	0.00343654	0.00506483	0.000256642	0.00489996	0.00238111	0.00425833	0.00413826	0.000975357	0.0032496	0.00478947	0.00190555	0.00107314	0.0152849	4.02679e-05
8.9021e-05	0.000127424	2.55847e-05	3.1176e-05	7.43557e-05	1.02779e-05	0.000124545	0.000306943	9.31302e-06	0.00285317	0.000551085	7.32953e-06	2.60048e-05	0.000247534	0.000187408	0.000101954	0.000774479	0.000526811	7.19486e-05	0.00018697	0.000822553	9.86784e-05	0.000459373	0.000158928	5.77082e-05	4.77046e-05	4.32216e-05	0.000882957	4.8887e-05	0.000289515	0.000431049	0.000156976	0.000410073	7.08831e-05	1.77182e-06	0.000394039	0.000235054	0.000624345	0.000217392	0.000852927	0.00018057	4.55586e-05	0.000824369	0.00133828	0.00030992	1.64709e-05	0.00167268	1.25426e-05	0.000983902	8.06458e-05
0.000480553	0.000223555	0.000477557	0.00247688	5.13496e-06	0.000724193	0.000893203	0.000780174	0.000630425	0.0016175	0.000453487	0.000227156	0.00104006	0.00101384	0.00144756	0.00181291	0.000193513	0.00121184	0.000254948	0.000140076	0.00188533	0.000393087	0.00179796	0.00335771	0.000123485	0.00168959	4.77335e-05	0.00189629	0.000875554	0.00263427	0.00177055	0.000148468	0.00343474	2.06881e-05	0.00185883	0.00395712	0.00477271	0.00278287	0.000243426	0.00310491	0.00183566	0.00273704	0.00324455	0.00117735	0.00611657	0.00410091	0.000719692	0.00125062	0.00774155	1.27423e-08
3.36057e-05	0.000109524	0.000561219	0.00024459	0.000198287	3.45149e-05	0.000694245	0.000155241	0.000271819	0.00206466	0.00168481	4.38056e-06	0.000189247	7.70537e-05	2.16172e-05	0.000226105	8.78406e-07	4.73124e-06	3.44865e-05	0.000106086	0.000378893	3.02146e-05	0.00365147	5.43594e-05	0.000189791	0.000203812	4.11374e-05	0.000456709	5.35323e-06	0.000134386	5.46932e-05	8.75147e-06	0.000867748	7.24348e-05	0.000144314	0.000826456	0.00161506	0.00376642	2.56226e-05	0.000950282	0.000432513	0.00247025	0.000200001	0.00203576	0.000835369	0.000573409	9.25369e-05	0.000102551	0.00228533	5.03486e-05
1.25233e-05	0.00020862	7.72492e-06	0.000178265	0.000151142	4.12459e-05	4.46765e-05	9.86981e-05	2.78966e-06	1.05966e-06	4.22223e-05	0.000560483	8.05299e-05	1.17172e-05	0.000203708	7.79538e-05	0.000196366	3.10417e-09	5.17153e-06	4.73471e-05	0.000167526	6.60536e-05	0.000373047	0.00026397	0.000242706	0.000122697	0.000118091	7.71612e-05	0.000219526	0.000246482	0.000308509	1.82063e-05	0.000272888	1.13942e-05	0.000425971	0.000291594	0.000358912	3.66113e-05	1.44026e-05	0.000310974	0.000174259	0.000125394	0.000257233	6.39092e-06	0.000397628	0.00042987	0.000157704	0.000246628	0.00038087	0.000199145
4.97027e-05	0.000129879	0.000200702	0.000750059	9.63283e-06	0.000455223	0.000381612	5.30978e-05	4.80871e-05	0.000762455	7.36538e-05	0.000609547	0.000269363	0.000353429	0.000253993	0.00133896	0.000220847	0.000610935	0.000204536	6.69268e-08	0.000267924	5.84957e-05	0.000675372	0.000729246	0.000338216	0.0013681	4.57739e-05	0.00119314	5.07747e-05	0.0007993	0.000814632	0.000185957	0.00207321	2.85153e-06	0.000927596	0.0013999	0.000346453	0.00186727	0.000568472	0.000637525	0.000594765	0.000386694	0.000822906	0.000655873	0.0018046	0.00143075	0.000946936	0.00157688	0.00398417	0.000239543
7.71187e-07	3.32568e-05	7.57421e-05	7.58054e-05	0.000344763	0.000212813	0.000109536	3.96489e-05	0.000130591	0.00194145	0.000121372	0.000151858	1.86058e-06	0.00065785	8.80901e-05	0.00315678	1.19423e-05	0.0011374	0.000236584	0.000946836	1.27863e-05	5.5418e-05	0.000937216	0.000556013	5.2117e-05	0.000303177	0.000119759	0.00279997	0.00169056	1.34857e-06	1.26573e-05	5.31964e-05	0.000624407	0.000515192	0.000224054	0.00216666	0.00110205	0.00982931	1.52867e-05	0.0009557	0.000594352	0.00018168	0.000326115	2.34819e-05	0.0010195	0.000593284	0.00129107	4.09399e-05	0.00327601	3.04061e-05
4.54692e-05	0.00030684	0.000371924	0.000610347	3.50624e-06	2.52102e-05	0.000255843	7.59342e-05	0.000181548	0.000458293	0.000117651	0.000548657	0.000371192	6.64758e-06	1.69334e-05	0.000387868	0.000291244	8.71157e-05	2.28349e-06	0.000250141	1.92891e-05	0.000350022	0.000556936	0.000536576	0.000151051	0.000148626	5.90862e-05	0.000434555	0.000139271	0.00115716	0.000318295	6.87548e-06	0.000393547	4.62121e-05	2.76352e-05	0.000280517	0.00195726	0.00196429	7.89e-06	0.00231203	0.00129921	0.000528325	0.000851369	0.000491868	0.00132671	0.00175781	0.000198798	0.000152819	0.00522011	1.56643e-05
0.00024418	2.11886e-05	1.77812e-05	1.94306e-05	4.77675e-05	5.4588e-05	0.000128737	2.4307e-05	2.82995e-05	0.0018231	1.68469e-05	3.35194e-05	4.21701e-05	2.58541e-05	9.18443e-05	2.58039e-07	0.00081828	0.000128697	2.09817e-06	0.00395867	9.99566e-05	0.00626041	0.000640533	7.09989e-05	1.14158e-06	0.000232535	0.00022796	0.000240508	0.000203026	0.000245056	0.000385225	0.000290862	1.51694e-05	0.00133025	2.03862e-05	0.000341477	0.000386553	0.000976673	5.15679e-05	3.18375e-05	0.000127844	8.95836e-05	6.91705e-05	2.5542e-05	2.29441e-05	0.000547015	3.50183e-05	4.78693e-05	0.00207754	0.000259918
0.00021402	0.000521331	0.000422824	0.00109174	0.000231229	0.000971614	0.00137694	4.76965e-05	3.20127e-06	0.00269188	0.000509825	8.43637e-05	6.92492e-06	0.000591441	2.71531e-06	0.00185749	0.000202522	0.000963602	6.68628e-05	0.000364326	0.00125478	0.000426828	0.00194907	0.00290797	0.000851727	0.00153219	0.00103618	0.00334963	9.67137e-05	0.00155781	0.00149004	0.000109764	0.00214657	0.000362557	0.000556331	0.00151393	0.001708	0.000850242	0.000653431	0.010116	0.00331002	0.00692456	0.00743211	0.000833603	0.000526004	0.00352873	0.00152026	0.00084179	0.0196784	1.86621e-05
0.00107246	1.46608e-05	1.5958e-05	0.000573634	0.000803572	0.00134275	7.69375e-05	0.000296281	0.000400369	0.00136333	3.08013e-06	1.28097e-05	6.80067e-05	0.000984041	6.73885e-06	0.00299968	0.000495847	0.00536704	2.58967e-06	0.00025311	0.00273043	0.000150563	0.000162949	0.000189493	8.26624e-05	0.00261376	0.000266791	0.000262627	5.54183e-05	0.000370197	0.00207513	3.17813e-05	0.000492583	0.000358825	6.01821e-05	1.16549e-06	0.000141066	0.000177908	0.00139025	0.0056269	9.92002e-07	0.000183929	0.00769821	4.75034e-05	4.06021e-05	0.00213755	0.00315055	0.000352522	0.00177577	5.38081e-05
2.06682e-05	0.000112493	6.22646e-06	1.99794e-05	1.40472e-05	1.61347e-06	5.89202e-05	0.000194132	0.000112181	0.000224543	0.000158661	8.17283e-06	0.000112271	4.67052e-05	8.31406e-05	0.000142147	0.000176001	8.22857e-05	1.22193e-07	1.34404e-05	8.75352e-06	0.000625521	0.000131821	1.26406e-05	5.51857e-05	0.00025497	6.85698e-06	0.000110438	0.000348669	4.8068e-05	9.71011e-07	0.000138085	0.000284391	8.48939e-05	6.28106e-05	0.0011987	0.000508394	0.00156886	2.87395e-05	1.61252e-05	0.000188264	5.5271e-05	2.66038e-05	0.000294052	0.000880205	0.000430197	0.000358776	0.000559225	0.000331687	3.02037e-06
2.73876e-05	0.000698492	0.000638926	0.0021572	0.000641036	0.00114901	0.00193953	6.62318e-05	2.32874e-05	0.00241434	0.00049936	0.000112539	0.000132839	0.000794677	2.54423e-06	0.00307779	0.000629512	0.00193525	3.11815e-05	0.00120155	0.000739655	8.83607e-05	0.00232219	0.00623368	0.000911037	0.00113643	0.00130097	0.00418217	2.27211e-05	0.00270277	0.00242726	3.45393e-05	0.00271701	0.000325768	0.00041458	0.00279402	0.00182935	0.00237058	0.00280747	0.0115798	0.00340265	0.0049619	0.0111374	0.00110571	0.00165452	0.00737706	0.00248767	0.000966854	0.0242856	3.23674e-05
1.50712e-05	0.000116791	6.41354e-05	0.00024494	0.00050793	0.000320565	0.000109776	2.3996e-08	8.64566e-05	2.10293e-05	1.10656e-05	0.000406135	9.07432e-05	4.71564e-05	0.000366716	0.000780899	7.20128e-05	0.000129302	1.50604e-05	5.72706e-06	0.000379645	4.32669e-05	7.00558e-06	5.58411e-05	9.25803e-05	0.00101224	0.000114973	0.00305857	2.91057e-05	0.000521608	0.000379111	0.000297137	0.000503659	0.00120929	2.09757e-05	0.000279586	0.000207573	0.000908573	0.000519354	0.000657529	0.000128917	0.000277273	0.000338119	0.000432448	0.000147236	0.000514255	0.000289957	0.00218589	0.000566213	3.04937e-09
0.000174137	1.42934e-05	4.62565e-06	1.06643e-05	0.000124166	0.000256792	6.78195e-06	9.31816e-05	5.07674e-05	9.71316e-06	7.07161e-05	0.000106587	0.00173579	5.18099e-06	6.59016e-05	1.58158e-05	4.79635e-05	0.00011693	5.62373e-05	2.39341e-05	3.21455e-07	3.72805e-06	1.26972e-05	5.72873e-05	4.15527e-05	0.000104431	1.48073e-05	0.000152994	8.5109e-06	0.000580675	3.2284e-05	0.000138156	9.23734e-06	9.93319e-05	0.000324939	7.69433e-05	0.000493747	2.3306e-06	8.04939e-06	0.00036133	1.92974e-06	0.00177975	0.00014802	2.65093e-06	0.000517172	6.40962e-06	0.00122959	0.000250668	0.000154181	0.000625358
3.25441e-07	0.000386928	3.1264e-05	2.90489e-05	4.16625e-06	7.31037e-05	9.59978e-05	2.03464e-05	9.19614e-06	0.000283125	7.86327e-05	0.000102098	0.000145415	1.74498e-06	4.25115e-08	2.83354e-05	0.000211975	2.64483e-05	1.52022e-05	2.11997e-05	0.000145992	3.44627e-05	0.000183248	0.000326875	0.000136782	1.84906e-07	9.75348e-06	4.49751e-05	2.34573e-05	7.23525e-05	5.56168e-05	9.78297e-06	6.30358e-05	8.41068e-06	6.57889e-06	5.28339e-05	0.000231768	0.000331084	1.80017e-06	3.11523e-05	0.000146035	2.39728e-05	3.93966e-05	0.000244726	0.000348115	1.04181e-05	4.33569e-05	1.4363e-05	5.12516e-05	2.14916e-05
0.000241279	3.47431e-07	0.000205311	0.000352352	0.000117601	2.64882e-05	3.99605e-06	0.000159329	7.29971e-05	0.00205086	0.000379209	2.1107e-05	0.000732667	1.3072e-05	2.01433e-05	7.57319e-05	8.47065e-06	3.15987e-06	4.91538e-05	5.16678e-05	0.000122207	3.69681e-06	0.000514026	5.30335e-05	5.311e-06	1.53816e-06	8.31401e-05	0.000212852	4.02294e-05	0.000202093	0.000160269	2.31703e-05	7.66986e-05	6.37584e-05	0.000469982	0.000186813	0.000592205	0.000180672	4.37978e-07	0.000718594	0.000349988	1.68735e-06	0.000471126	0.000666916	0.000432251	0.000534388	0.00011145	0.000127836	0.00147497	0.000174488
2.2877e-05	0.000413211	9.10281e-05	0.000173246	4.89428e-07	9.24768e-07	0.000133694	6.60405e-05	8.28056e-06	7.6138e-05	0.000184987	6.73579e-07	0.000201164	7.14951e-05	6.99725e-06	0.000186018	0.000112977	6.53979e-06	2.13248e-05	1.0219e-06	0.000116015	4.00565e-05	8.3096e-05	0.000618872	0.000154018	7.32599e-05	6.49989e-07	0.000258474	7.23683e-05	0.000174691	3.52163e-05	8.71095e-05	0.000123938	1.12849e-05	1.36666e-06	0.000257485	0.000278761	0.000453212	3.44808e-05	0.000347251	0.000325834	6.49816e-05	0.000129334	2.99495e-05	0.000546	0.000305606	4.98199e-05	2.83776e-05	0.000355619	2.61449e-07
9.93396e-05	2.23156e-05	1.02242e-05	0.000248445	4.46363e-06	8.36213e-05	2.67924e-05	5.61448e-07	6.97779e-05	8.128e-05	0.000238822	3.09649e-06	0.00124721	2.84173e-05	7.24422e-05	7.75488e-05	2.23689e-06	2.89349e-05	3.17428e-05	3.40052e-06	7.35888e-05	4.93786e-05	5.84483e-05	2.10496e-05	2.98086e-05	7.65092e-05	4.52858e-05	2.14892e-05	0.000500881	3.13677e-05	0.000263998	0.000105924	0.000201218	7.32781e-06	0.000729358	1.17775e-05	0.000640175	0.000212704	8.61208e-05	0.000106608	6.40793e-05	6.13565e-06	8.79991e-05	0.00027087	0.00122385	0.000412168	0.000126009	2.51998e-05	0.000398091	1.16775e-05
3.69749e-05	0.000107289	4.96296e-07	6.4918e-07	2.03093e-05	6.45651e-05	9.96727e-06	2.4166e-05	1.31107e-05	3.9115e-05	0.000160931	9.84171e-05	4.97432e-05	3.30927e-05	3.97115e-07	0.000113663	4.48601e-05	8.9781e-06	0.000203611	3.43689e-06	2.10601e-06	2.9693e-05	0.000270462	1.2168e-05	7.37601e-05	1.49281e-05	1.56518e-05	3.16543e-08	0.000277171	0.000127727	0.000126238	0.000110828	8.44933e-05	0.000231667	1.7036e-05	1.03481e-08	9.7446e-06	1.79869e-07	3.89383e-05	0.000592228	2.78734e-05	9.22224e-05	0.000592324	1.87587e-06	0.000177308	0.00012697	2.26842e-05	3.89242e-05	3.90224e-07	3.29505e-05
1.99168e-06	0.00018115	0.00010801	0.000574598	8.01306e-07	0.000181946	0.000129726	0.00025541	7.02373e-05	0.000878013	0.000462459	2.30473e-07	0.000339258	0.000357008	2.28898e-05	0.000554885	6.97686e-05	0.000246936	0.000137029	8.97713e-06	1.06716e-05	3.06166e-05	0.00093842	0.000674299	0.000170276	0.000274856	1.61071e-05	0.000361862	0.000165705	0.000441497	0.000367754	0.000284059	0.000560306	1.42798e-08	0.000248027	0.000390726	0.000975124	0.00130662	0.000132027	0.00141272	0.000629903	0.000213484	0.000493757	0.000891276	0.00134604	0.000739801	0.000182304	2.58287e-05	0.00193553	5.88188e-05
0.000188767	9.88759e-05	6.52515e-05	5.73474e-05	1.57516e-05	1.45875e-05	0.000133916	5.23587e-05	1.69206e-05	0.00099219	0.000100325	6.85741e-05	0.000156903	1.17947e-05	8.94769e-05	0.000111093	7.74384e-05	1.55349e-05	0.000158661	0.000120805	0.000161586	8.77717e-05	0.000217379	4.00141e-05	2.59296e-05	0.000191428	5.97834e-08	8.18363e-05	2.63635e-05	1.02439e-05	1.07141e-05	1.52228e-07	0.000238082	1.13856e-05	1.09549e-05	2.75105e-05	0.00102695	0.000800886	4.4516e-05	0.000909394	0.000417695	0.000323597	3.07464e-06	0.000603329	0.000658462	0.000274405	0.000571288	1.17333e-06	0.00199899	5.25399e-05
0.000184739	0.000110506	0.000151676	0.000202579	4.30311e-06	5.52737e-05	0.000118147	6.09572e-05	0.000115594	0.00129822	0.000547207	6.11994e-05	0.00100482	0.000160651	3.40825e-07	8.52583e-05	2.5586e-05	3.79596e-05	4.97951e-05	2.80261e-05	0.000568093	1.82116e-05	0.000513668	0.00030389	8.81271e-05	2.03669e-05	5.60231e-05	0.000249455	2.11856e-06	0.000521331	0.000321286	5.59063e-05	0.000132555	0.000211407	0.000822897	4.5923e-07	0.000278354	8.67217e-05	0.000100806	0.000551751	0.000487156	5.8513e-05	0.000320812	0.000382644	0.00113	0.000672475	1.64327e-05	1.27536e-05	0.00119758	7.12992e-05
5.53486e-05	1.22108e-05	1.60046e-05	3.12596e-05	8.14951e-05	9.93853e-05	7.08991e-06	1.10103e-06	1.4268e-05	0.000185781	2.31274e-05	0.000197545	1.03103e-06	1.76891e-05	2.49655e-05	0.000209263	6.34596e-05	9.86659e-05	0.000233113	5.59525e-08	0.000154818	1.54222e-06	0.000474099	4.21756e-10	1.21147e-05	0.000277332	4.49118e-06	7.11568e-05	3.57114e-05	8.52499e-06	0.000137203	1.30324e-07	0.000383941	1.83107e-05	0.000488008	0.000519836	0.00016491	0.000223164	4.49232e-05	0.000231885	0.000110514	7.4817e-05	9.82937e-05	4.4918e-05	0.00019448	0.000218795	2.63993e-05	6.45116e-05	0.000528853	0.000135053
0.000566803	2.04259e-05	0.000207327	0.000901677	7.11328e-05	0.000125886	0.000186559	0.0002795	0.00025839	0.000106677	0.000107429	7.43706e-05	0.000162568	3.75628e-05	0.000105012	0.000299791	6.44762e-05	2.5945e-05	6.37222e-05	0.000139557	0.000552186	0.000149456	0.000984792	0.00069363	0.00014931	0.000162875	3.21347e-06	0.000100217	0.000241764	0.000176538	9.43052e-05	1.92617e-06	0.000480004	0.000196775	0.00132944	0.00165389	0.000713665	0.000790124	7.91745e-06	0.000994697	0.000756407	0.000754028	0.000569541	0.000209404	0.000703298	0.000441758	0.000265401	0.000222024	0.00157385	3.46776e-05
0.00096599	2.26726e-06	0.000149472	0.00106992	5.80754e-05	0.000350376	0.000120423	3.82584e-05	2.35708e-05	4.92001e-05	3.0453e-05	0.00023954	1.61658e-05	0.00018843	0.000183064	0.000997995	3.59474e-10	0.000677908	2.34412e-06	2.19588e-05	2.01674e-05	0.000147686	7.6193e-05	0.000562617	3.87586e-06	0.00157983	7.29251e-07	0.000165739	0.00125561	0.000246178	0.000311067	0.000115837	0.000874831	4.14587e-05	0.000634171	8.93551e-06	0.00035268	0.000467181	3.47065e-05	0.000841937	0.000217991	0.00174906	0.000701165	6.77944e-05	0.000465402	0.000210994	0.000502115	0.00115454	0.00170884	0.000182839
0.000355801	6.03255e-06	1.72438e-05	9.45305e-05	6.58679e-06	6.46044e-07	6.68059e-05	0.000184866	5.97606e-06	0.000529024	2.53229e-05	4.56742e-05	0.000107939	0.000836717	6.64585e-05	0.000610907	0.000141234	0.00112763	2.92849e-06	0.000178624	0.000139678	2.80347e-05	0.000161797	0.000160529	6.11044e-05	0.000338695	0.000475951	0.000377406	0.000710193	0.00141752	0.00017641	0.000248688	0.000369424	0.000219551	4.94433e-07	0.00162652	1.93793e-12	5.77931e-08	0.00038506	0.000172253	1.40557e-06	5.18081e-05	0.00107594	5.64184e-06	1.16932e-06	3.10549e-05	0.000409026	0.000318825	0.000819595	0.000121974
0.000200387	0.000422802	3.56043e-07	0.000156382	4.60004e-05	0.00029468	3.4625e-05	8.95981e-07	7.46248e-05	1.77437e-05	0.000113397	1.21538e-08	0.000509531	1.30464e-05	0.000173372	0.000147786	2.02849e-07	3.60296e-05	6.8486e-05	0.000122095	1.0332e-05	2.33877e-05	0.000103738	5.45115e-05	0.000127421	0.000119861	9.48821e-06	2.00656e-06	0.000825803	3.20015e-05	0.000353361	8.13586e-09	0.000142722	3.75842e-06	9.05924e-05	0.000439216	0.000337463	2.79095e-05	5.19789e-05	0.000792558	0.000135343	7.80063e-06	0.000861808	0.000183455	0.000772784	0.00205414	5.13233e-06	0.000202507	0.000665279	4.09628e-05
3.14361e-05	0.000305524	0.000132536	0.000619118	0.000433981	0.000439131	0.000456377	1.1784e-05	7.43137e-05	0.000732224	0.000464452	3.36126e-08	4.34382e-05	0.000714787	8.51629e-06	0.00076919	6.09406e-08	0.00201815	5.87419e-07	0.000396393	0.000332418	0.000118811	0.000358544	0.00117304	5.96452e-05	0.00143195	6.35978e-06	0.00161726	0.000363849	0.000436525	0.000594568	4.70351e-07	0.000814463	0.000117647	6.68223e-05	0.00126467	0.00317905	0.00357875	1.51654e-05	0.00330911	0.00105658	0.0018309	0.000373082	0.00227636	0.00100175	0.00232533	0.00282417	0.000590603	0.00489085	0.000233206
5.01193e-06	0.000114292	7.25227e-05	0.000161107	8.2502e-06	2.49659e-05	0.000127374	0.000215759	0.000344063	0.00133273	3.82195e-05	4.96372e-05	0.00014763	4.96404e-05	2.90575e-05	0.000302273	0.000154244	1.98368e-05	0.000175121	0.000154947	0.000452507	0.000161384	0.000811286	0.000230109	4.69686e-05	0.000908069	2.78649e-05	0.000280156	3.08149e-05	0.000164769	3.14845e-05	6.47965e-05	0.000641415	0.00037869	0.00039115	0.000690557	0.00163188	0.00240402	7.63621e-06	0.000298656	0.000748766	0.000477433	4.22806e-05	0.000706457	0.00143171	0.00120644	0.000401545	0.000164165	0.00261582	2.38972e-05
0.000149837	7.89282e-05	1.3071e-05	0.000319882	1.43032e-05	4.50125e-05	3.9835e-05	5.27198e-06	0.000268016	4.61837e-06	1.18735e-05	3.62702e-05	4.34261e-06	0.000118381	0.000208171	0.000600141	1.22461e-05	0.000686071	6.9768e-06	5.64915e-05	0.000224757	2.25258e-06	9.81453e-06	0.000184737	2.86921e-05	0.00070047	6.70831e-05	0.000437482	2.87228e-05	0.000122489	0.000483934	0.000339834	0.000867826	1.99231e-05	0.000100786	0.000301798	4.1245e-05	3.76709e-05	0.000199106	0.000365332	7.04192e-06	3.55604e-05	0.00175857	3.50515e-05	4.92228e-05	0.000292939	0.00104068	0.000116903	0.00211105	1.64827e-05
0.0001992	0.00017252	0.000211982	0.000218953	3.37709e-05	7.58246e-05	0.000225563	0.000103127	2.96797e-05	0.00117274	2.83922e-05	2.2263e-09	3.37742e-05	9.75297e-05	0.000147359	0.000304244	2.56433e-05	0.000377609	0.000249707	0.000926618	0.000951552	5.71038e-05	0.0015571	0.000940591	0.000157525	0.000149103	7.36932e-05	1.07433e-05	0.000671037	0.000106794	2.24136e-06	6.90625e-06	0.000293838	0.000893023	1.124e-06	0.000740523	0.000589003	0.000839895	8.16574e-05	0.00410693	0.0013627	0.00269752	0.000614505	0.000277362	0.000442935	0.00107138	0.000446459	2.39725e-06	0.00423315	0.000132719
0.000277173	1.36332e-05	5.31441e-05	0.000540962	2.74173e-07	0.000199506	0.000224724	1.8099e-05	8.74727e-05	8.81208e-05	0.000721133	0.000583013	0.000614736	5.91782e-05	0.00141971	0.000437568	0.000335625	4.97762e-06	8.84277e-05	8.80428e-05	0.000232956	0.000114463	0.000306106	0.000729505	5.42586e-06	0.00042612	1.7666e-05	0.000105055	0.00432177	9.65175e-06	0.000231647	8.00997e-05	0.00214463	0.000412737	0.000203578	0.00330127	0.000377445	0.000366519	6.6953e-06	8.84641e-05	0.00031771	0.00304652	0.00106456	0.00044471	0.00052925	0.000484151	0.000218388	0.00187175	0.00303177	0.000471834
4.50387e-05	0.00019476	4.49133e-05	4.50814e-05	2.00473e-06	0.000215116	4.37562e-07	4.80053e-08	4.36304e-05	0.000459731	2.10488e-05	1.57076e-05	2.16811e-05	2.42362e-05	4.05731e-06	8.73362e-05	1.56301e-05	7.51582e-05	0.000178071	2.67414e-05	0.000139053	8.1562e-06	0.00033514	3.20236e-06	4.31495e-05	1.75827e-05	7.68933e-06	3.8768e-05	5.62234e-05	9.51311e-07	2.66479e-05	1.11077e-05	9.10649e-05	8.00148e-05	0.000184023	0.000177171	0.000139895	0.000208835	6.33886e-06	0.000330966	8.37822e-05	0.000246999	0.000238695	0.000234719	0.000198207	0.000217522	9.252e-05	6.30447e-06	0.000706467	2.15947e-05
5.18315e-05	0.000265251	9.58074e-05	0.000804364	6.23465e-05	0.000625689	0.00050514	2.14263e-05	4.66983e-05	0.000247207	0.000293935	0.000285376	6.159e-05	0.000117801	7.18224e-05	0.000529316	4.36079e-06	0.000458348	4.39875e-05	0.000384619	0.00154422	8.69975e-05	0.000995691	0.000951292	7.12784e-05	0.000449918	0.00050001	0.000520677	0.000499685	0.000619279	0.000790068	1.99026e-05	0.000776054	8.90402e-05	0.000135223	0.00034522	0.00197214	0.0011529	2.77388e-06	0.00357343	0.000862331	0.00202697	0.00131745	0.000561138	0.00179076	0.00278165	0.00099033	6.64262e-06	0.00393612	6.53527e-05
1.05262e-05	4.21778e-05	2.54623e-05	0.000326162	3.59429e-05	4.91661e-06	0.000126042	1.95456e-05	4.22157e-05	0.000206022	0.000109449	0.000268979	5.93421e-05	0.000935652	2.15523e-06	0.000530431	9.86994e-05	0.00143328	8.75647e-05	0.000103908	0.000542836	3.04965e-06	1.01466e-05	0.000326401	0.000127087	0.000653039	0.000407773	0.000630017	1.46963e-05	0.000750489	0.000390127	0.000225573	0.000958087	7.52814e-06	0.000122332	0.000707732	5.49695e-06	7.21852e-05	0.000262189	0.000249624	3.7251e-05	0.000322709	0.00175516	5.92711e-06	2.55519e-05	6.87666e-05	0.00027021	0.000608601	0.00284531	1.38458e-05
0.000353175	2.81278e-05	1.0754e-07	0.00010067	5.52096e-05	0.00029117	9.60543e-07	0.000860798	2.48123e-05	0.000285658	0.000453321	0.00372208	0.000212222	3.78173e-05	0.000380272	0.000505765	0.000442088	0.000519353	4.00614e-06	0.000105247	6.85835e-05	0.000332151	5.45612e-05	7.1088e-05	2.44563e-07	0.00384884	0.000235296	0.000801002	4.1695e-05	3.07785e-05	0.000201979	6.75252e-05	0.0014361	0.000847937	0.00026122	0.000590382	0.000259774	0.00188238	2.49892e-05	0.000399556	1.67024e-05	0.000534327	5.54627e-05	0.00092491	1.5854e-05	1.6343e-05	0.000912701	0.00439912	0.000401844	9.31371e-05
0.000259151	9.36204e-06	7.72559e-05	0.000283076	7.82902e-05	0.00142058	2.5521e-06	0.00083269	0.000537391	0.000650192	0.00010346	0.00118895	1.48521e-05	0.000475201	5.0176e-05	0.00105579	7.29351e-07	0.00426533	4.28075e-05	0.000127238	0.000838361	6.10881e-07	0.00012115	8.72146e-08	1.59162e-05	0.00192985	2.78119e-06	0.000108335	0.000253846	0.000218425	0.00142699	5.05849e-05	0.000574487	0.000738166	4.86382e-06	5.41947e-05	6.37761e-05	0.00044256	0.00159386	0.000909577	4.86113e-07	0.000194042	0.00108776	6.58304e-06	0.000101382	0.0025441	0.000748187	0.0011153	0.000738979	3.52813e-06
4.64347e-06	2.13652e-05	3.30624e-05	0.000113564	0.000119386	6.28593e-05	4.34997e-05	1.3827e-05	4.54967e-06	4.75609e-05	0.000185989	4.64102e-07	7.35749e-05	1.9744e-06	0.000116474	7.601e-05	0.000297603	5.07744e-05	0.00017635	1.14718e-05	0.000276125	2.49548e-05	0.000583279	0.000266029	8.4025e-07	2.18792e-05	0.000357349	9.47612e-06	0.00023472	0.000412793	1.82962e-05	3.58334e-06	0.000320324	7.66839e-05	3.51972e-05	0.000350775	7.59961e-06	0.000251742	5.61596e-05	0.000770697	0.000126456	0.000801101	0.000444582	1.75189e-05	0.000310282	6.47745e-05	0.000262224	6.2995e-05	0.000179515	5.31029e-05
1.38143e-05	7.95226e-05	0.000212172	0.00052149	4.27062e-06	0.000109236	0.000234642	0.000113874	0.000188732	0.00192362	0.000433686	4.536e-05	0.000292361	0.000376329	3.00659e-06	0.000675393	0.000156023	0.000272219	0.000150239	2.20084e-06	0.000236083	6.11191e-05	0.00157519	0.000470656	7.90458e-05	0.000331251	4.21764e-06	0.000458659	1.78004e-05	3.52298e-05	6.81521e-05	7.17303e-05	0.00065069	5.81663e-06	0.000391359	0.000433349	0.00110306	0.00235413	7.82074e-05	0.00174172	0.000855827	0.000688311	0.000486171	0.00135695	0.00142922	0.00113407	0.000915603	3.70728e-06	0.00338906	6.87393e-08
0.000492346	2.2622e-09	4.45727e-07	2.234e-05	6.30154e-05	4.05716e-05	5.04362e-05	8.05805e-06	5.54957e-05	0.000514945	2.52077e-06	0.000470974	6.56026e-05	0.000338886	1.93839e-06	0.000106179	0.000317972	0.000940598	0.000134208	6.94086e-06	3.86729e-07	8.41783e-05	6.43579e-05	2.01115e-05	4.42779e-06	0.000568826	0.000774765	7.41641e-06	0.00010351	0.00078003	2.64782e-05	0.000131	0.0001741	0.000547132	7.72727e-05	1.04538e-05	1.40877e-05	6.79346e-05	0.000110265	0.000138135	2.18349e-06	0.000613968	0.000141101	0.000795093	0.000354817	3.69175e-05	0.00164032	0.000455584	0.000116452	9.30907e-05
6.64474e-10	3.89019e-05	0.000326969	8.652e-05	3.59931e-06	8.17217e-05	1.69926e-05	3.12755e-05	0.00022656	0.000259573	0.00104534	2.35437e-06	0.00026229	0.000711323	5.416e-06	0.000143945	8.981e-05	0.000511409	9.83954e-05	0.000252509	1.81149e-05	0.000121197	0.000158392	6.64966e-05	2.82048e-05	1.29769e-06	2.25969e-05	0.000467903	1.47401e-05	4.65333e-06	0.000278503	0.000162233	0.000180968	0.000163049	8.49763e-05	7.96382e-06	0.000309633	0.000416211	0.000265865	0.000426577	0.000121635	2.35516e-06	0.000268147	0.000963649	0.000708511	0.000145307	1.34449e-05	6.11681e-06	0.000316241	2.02245e-05
3.10615e-05	4.05602e-06	4.14299e-05	0.000232177	0.000115288	5.15335e-05	2.77053e-05	0.000138722	0.000176751	0.000139866	0.000236295	0.000462188	0.00079119	9.08435e-05	1.88026e-05	8.59254e-05	0.000168873	7.98284e-06	3.04296e-05	7.37898e-05	0.00023496	1.48999e-05	3.87581e-05	0.000227063	8.91037e-07	1.53041e-06	2.05997e-06	0.00216571	4.16886e-05	0.00178796	0.000241048	0.000512705	0.00046839	2.09075e-06	0.000685821	4.83621e-06	0.000367645	0.000461932	4.07267e-05	9.77979e-06	1.65406e-05	1.57427e-06	6.73279e-06	6.19638e-05	0.000873758	6.11863e-05	0.000791079	0.000366887	6.20418e-05	8.82706e-05
6.57531e-06	9.9271e-05	5.94782e-06	1.89291e-05	6.16459e-07	1.79168e-05	5.94123e-05	1.40324e-06	1.95021e-06	0.000270534	0.000195424	4.13934e-06	0.000622185	0.000765658	3.89075e-05	0.000511753	5.15342e-05	0.000979091	0.000332726	3.29122e-06	5.61204e-05	0.000146862	0.000304006	0.000353509	8.09145e-05	0.000365931	0.00030325	0.00166081	0.000544597	4.41448e-05	0.000223948	2.14422e-05	0.00048342	5.8791e-08	6.16978e-05	0.0023514	0.000144973	0.000284686	0.000140827	0.000702762	0.000165065	0.000384126	0.00203888	0.000191303	5.32343e-05	0.00027434	0.000434336	5.14408e-05	0.00237286	1.47069e-05
3.27941e-07	0.000139245	3.2343e-05	0.000627883	5.97244e-05	0.00127278	0.000105733	5.90347e-05	4.75153e-05	1.14294e-07	6.85083e-05	0.00211244	3.03941e-05	3.02738e-05	0.000550346	0.00114187	4.35863e-05	0.00124737	9.22599e-06	0.000572718	0.000310075	0.000203622	0.000297582	0.00098535	2.76818e-05	0.0019092	5.37196e-06	0.00335034	0.000727453	0.000666822	0.000883891	4.09477e-06	0.00140289	2.4898e-05	1.31279e-05	0.00130624	0.00263889	0.00214751	9.11745e-06	0.0018168	0.000967851	0.00136273	0.000943403	2.40306e-06	6.04412e-05	0.00239155	0.00050797	0.00209971	0.0037873	4.12131e-05
2.86823e-05	1.25745e-06	5.35817e-07	3.56618e-05	1.08269e-05	2.45643e-06	3.42932e-05	8.27621e-05	7.3926e-05	0.000252755	1.20039e-05	7.33339e-05	0.000261415	5.74028e-06	5.94798e-05	7.18037e-05	2.09589e-06	7.88564e-08	1.15814e-06	3.30354e-07	2.66376e-05	6.16558e-05	8.09932e-06	2.90339e-05	1.90325e-07	0.000169518	6.21328e-05	1.73814e-05	6.55428e-07	0.000215189	9.11479e-07	1.67872e-05	6.93295e-05	1.08937e-05	3.43699e-05	9.55614e-05	0.000429249	5.54163e-05	1.08737e-06	6.31454e-05	8.62033e-05	1.46513e-08	3.47555e-05	4.07133e-06	5.62144e-05	0.000232576	4.69288e-05	0.000429136	0.000504464	5.01334e-05
3.56489e-05	7.99055e-06	0.000163926	0.000104443	0.00011466	8.77818e-06	9.35647e-05	1.03751e-05	2.70147e-05	0.000709226	0.000460022	0.000218456	3.4312e-07	0.000410531	0.000118181	0.000353538	1.91778e-05	0.000453582	0.00017549	2.31497e-06	0.00107609	9.5879e-05	0.000136466	0.000127474	2.92778e-05	4.62754e-05	8.00199e-05	0.00237376	0.00107347	0.000221058	0.000248735	0.000152324	0.000386034	0.000108587	0.000361232	0.000729371	0.000377833	0.000791078	1.38823e-05	0.000406483	8.27801e-05	0.000650658	0.000969723	2.8976e-05	0.000169946	0.00010567	5.36959e-05	0.000191625	0.00260195	6.20151e-06
0.000398428	0.000150412	0.000216722	0.000834182	6.93338e-05	0.000249299	0.000357882	0.000132297	0.000220142	0.000739375	0.00115747	4.22371e-07	0.00140143	0.000660204	0.000682228	0.000671709	0.000497085	0.000655251	0.00035482	0.000296648	0.000400857	3.51665e-05	0.000340434	0.000870293	0.000189608	0.000566865	0.000340061	0.000117767	0.000151808	0.00010427	0.000765587	0.000102079	0.00133168	5.46074e-05	0.00125422	0.000965095	0.000433235	0.000270995	0.00133488	0.00044311	0.00034869	0.000193711	0.000926445	0.000632783	0.00413642	0.00124348	0.000527062	0.000136306	0.000978269	0.000149428
0.000210567	1.65444e-06	5.99373e-05	2.61972e-06	6.59924e-05	0.000377951	7.91226e-05	0.000231618	0.000615277	0.00353507	9.92273e-05	6.41242e-05	1.02028e-05	5.24011e-05	1.51017e-05	0.0014418	0.000749302	0.0002594	0.000526933	1.04481e-05	0.00175756	0.000483682	0.000522921	0.000248347	1.07379e-05	0.00026521	0.000256852	0.0049402	0.00151257	4.16148e-07	5.9982e-05	0.000584136	0.000247427	0.000594072	1.35494e-05	0.00135155	0.00232052	0.00496922	0.000156529	0.000921137	0.00145584	0.000326724	0.000192342	8.41429e-08	8.48541e-05	9.48214e-06	0.000829425	0.000150451	0.00274546	2.41642e-05
0.000131877	0.00012434	0.000460915	0.00174494	4.62968e-06	0.000201883	0.000575588	0.000264913	0.000206295	0.00124942	0.00121215	0.000166518	0.000740107	0.000592834	0.00060387	0.00131671	9.92881e-05	0.000666306	0.000415534	4.84883e-06	0.000436392	0.000100179	0.00110094	0.00159336	0.000158927	0.00103879	3.40453e-06	0.000347103	0.000297824	0.000686565	0.000864787	0.000112891	0.00213831	4.5355e-06	0.00116	0.00242335	0.00159277	0.00212183	0.00031337	0.00186433	0.00108252	0.00183227	0.00200482	0.000322009	0.00295019	0.00301031	0.00096031	0.000792921	0.00599085	9.24057e-07
5.83457e-05	4.09036e-05	1.11373e-05	0.000250149	1.08478e-07	0.000390644	1.95464e-05	6.45546e-06	4.61978e-06	0.000242486	4.88661e-06	0.000341339	0.000527776	7.96402e-05	0.000348435	0.00025634	0.000117658	0.00014653	5.58791e-07	0.000123145	0.000367555	0.000377322	6.56123e-05	7.72735e-05	7.25477e-05	0.000586093	7.08896e-05	0.00145671	5.21101e-05	0.00111627	0.000630545	0.00103535	0.00030677	0.000908459	0.000291585	8.59446e-06	8.41812e-05	0.000214845	9.31663e-05	0.00013321	0.000108154	5.11324e-05	0.000206702	0.000506948	7.37288e-06	0.000502158	0.000183679	0.000540479	0.000136683	0.000102528
0.000151494	0.000119701	0.000296644	0.00152655	0.000167277	0.000285549	0.000837549	0.00011371	0.000253664	0.00473132	0.000372958	8.09689e-06	0.000230424	0.000370847	0.000393789	0.000886499	4.95256e-05	0.000490139	7.75756e-05	0.000198845	4.57428e-05	0.000177915	0.00137491	0.00190083	1.26515e-05	0.000492545	0.000172701	0.000159525	9.74395e-05	0.000344082	3.11311e-05	5.52906e-06	0.00154887	0.000595549	0.00122391	0.00408943	0.00343951	0.00452279	8.75902e-07	0.00238418	0.00138726	0.00308521	0.00106709	0.00183994	0.00247839	0.00239619	0.00253063	0.000290756	0.0107685	0.000281371
2.91829e-06	1.937e-06	0.000223972	0.00024133	8.61811e-06	9.90848e-05	2.95508e-05	5.68374e-06	3.79842e-05	0.000276199	0.000823652	0.000306565	0.000600759	0.000692297	8.3911e-05	7.68917e-05	1.44124e-05	0.000386897	2.78572e-05	7.06238e-07	9.15254e-05	1.72036e-06	0.000168623	0.000107995	8.96137e-06	2.47776e-05	9.59791e-06	0.000556575	0.000133086	6.56808e-06	0.000130151	7.09889e-05	4.47067e-05	8.28913e-05	0.000161348	3.09089e-05	0.000842863	0.000579071	0.00015579	0.00105044	0.000306172	0.000178147	0.000367898	0.000323037	0.000347915	0.000577384	0.00113418	1.72458e-05	0.001085	4.59786e-07
1.85729e-06	4.92124e-06	5.19703e-06	1.46277e-05	3.02291e-06	7.40537e-05	2.76725e-05	9.35606e-05	3.33082e-05	2.72794e-06	3.93452e-06	0.000128404	7.33662e-05	3.53637e-05	0.000120638	1.27432e-05	0.000269646	9.51674e-05	6.65896e-06	0.000147367	0.00321968	6.80515e-06	4.34148e-06	4.91553e-06	5.1401e-08	3.32498e-06	0.000231355	0.00400219	4.75954e-05	0.000856368	2.54381e-05	5.33229e-05	0.000109152	1.46624e-05	1.32446e-08	0.000431972	1.76183e-05	0.000239165	2.40522e-05	2.9676e-05	3.23791e-05	9.14402e-08	1.17808e-05	7.55835e-05	0.000107251	7.36143e-06	0.000796727	0.000473919	7.19453e-05	8.69473e-05
0.000155044	9.6242e-06	9.53799e-06	0.000251365	4.50066e-05	7.21005e-05	2.5299e-05	0.000525292	0.000179159	8.45234e-05	1.8292e-06	9.9792e-05	2.37048e-06	8.97481e-06	0.000124883	0.000349888	7.7801e-05	1.54634e-08	0.000135161	1.87768e-05	4.16151e-05	1.75505e-05	0.000668393	0.000261708	0.000144297	0.000317018	1.84303e-05	1.55583e-05	0.000351757	0.00020004	1.81239e-05	0.000101845	0.000389927	8.27889e-05	0.000554046	0.00093867	0.000403472	0.00139372	6.90488e-06	0.000181202	0.000452976	0.000232856	7.27857e-06	2.56494e-05	0.000604925	0.000257774	8.66283e-05	0.000572991	0.000590986	2.11648e-05
8.49805e-05	8.29851e-06	0.000183961	0.00063531	1.1286e-05	0.000312363	4.33548e-05	5.89504e-05	3.65609e-05	0.00101148	0.000423971	0.000456654	6.70334e-05	6.46041e-05	2.40251e-07	0.00093216	2.07969e-05	0.000524918	0.000145348	0.000172046	0.000303107	7.66695e-05	0.000939785	0.000141233	0.00030755	0.000462663	0.000238547	0.00131345	6.45354e-07	0.000835898	0.00077277	3.37716e-05	0.000663876	0.000170014	0.000821799	0.000586727	0.00108457	0.000988075	4.79171e-05	0.00221129	0.000949347	0.000329092	0.00138958	0.00016598	0.000198155	0.00212932	2.61295e-05	2.90505e-06	0.00571275	0.000292246
1.25708e-05	1.17424e-06	1.01573e-09	0.000295453	6.12124e-05	0.000113768	0.0001801	0.000119418	3.60973e-07	0.000228841	2.44096e-06	2.06624e-05	0.00122501	6.58169e-05	4.87086e-05	0.00090011	0.000143605	1.61943e-05	0.000103615	7.22166e-05	0.000421046	1.67186e-06	1.73778e-05	0.000298305	0.00010789	0.00160561	0.000992388	0.00294972	0.000107383	0.00156021	0.000117918	0.000991838	0.000822009	0.000406874	0.000835805	0.000117817	0.00076963	0.000135096	0.000142271	0.000663055	0.000396065	5.03479e-06	0.000299405	5.00192e-06	3.1291e-05	0.000613815	1.06108e-05	0.001026	0.00260385	0.00018739
1.4513e-05	5.41862e-05	0.000270446	0.000648294	1.72437e-05	0.000151678	0.000300084	2.0901e-07	6.2119e-05	0.00056477	0.000397684	0.000157953	0.000542129	0.00046373	0.000282007	0.000876564	2.16311e-05	0.000179803	0.000314711	4.06334e-05	4.23646e-05	6.27973e-05	0.000542146	0.000511236	5.60906e-05	0.0012168	3.69639e-06	0.000442648	1.48158e-05	0.000250555	0.000457025	2.66693e-05	0.00152155	8.3401e-06	0.000811024	0.000669083	0.00068457	0.000636777	0.000310434	0.00100186	0.00059366	0.000858756	0.000945433	0.000117957	0.0017397	0.00177484	0.000938383	0.000758431	0.00365734	8.01758e-07
0.000127207	0.00045555	0.000148574	0.000251236	7.76722e-05	0.000414235	0.000281527	7.04399e-05	3.17832e-06	0.00107888	0.000339135	1.61139e-05	8.66851e-05	0.000518227	3.1651e-05	0.00073597	3.15325e-05	0.000551746	0.000137996	0.000147905	0.000469255	0.000113211	0.000831875	0.000407358	0.000309705	0.0004064	0.000308707	0.00175142	0.000909941	0.000206993	0.000587819	6.42973e-05	0.000487291	1.24406e-08	6.91188e-05	0.000799096	0.0002472	0.0013095	0.000496206	0.0012315	0.000586013	0.000373636	0.00157212	0.00112529	0.000465507	0.0030189	0.000715034	0.000275538	0.00526954	7.68918e-06
2.20855e-05	8.94446e-05	3.38067e-05	0.000230944	2.72397e-05	0.000636539	6.57356e-05	9.55555e-06	1.32323e-05	1.52416e-05	0.000119566	0.000540041	5.33313e-06	3.39047e-06	0.000912333	0.00015324	5.30497e-06	9.79792e-05	3.74233e-07	1.46975e-05	0.000679285	0.000187727	3.07034e-06	0.000240232	1.04893e-07	0.000169527	7.7691e-05	0.00036241	0.000165465	0.000116558	0.000480625	1.6835e-05	0.000430587	0.000176348	4.63876e-05	0.000385526	0.000394167	0.000119912	3.30827e-08	0.000458714	0.000116627	0.000891333	0.0005166	5.35359e-05	0.000325387	0.00176365	1.18541e-06	0.000121979	0.00109058	0.000159978
0.00014752	2.61431e-05	3.49441e-06	0.000421274	2.29096e-05	0.00063011	0.000117065	0.000101098	0.000378995	0.000210723	1.77413e-05	2.10858e-05	7.16797e-06	0.00034737	0.000154536	0.000230999	0.000957162	0.00052079	2.49293e-06	3.69523e-05	0.000470587	0.000324704	6.82723e-05	0.000370745	1.42144e-05	0.000297496	0.000283358	0.000299826	0.00109681	6.30683e-05	0.000512592	0.000372639	8.01557e-05	0.000332858	8.16675e-05	5.80114e-06	5.46226e-05	5.55011e-06	0.000286023	0.00215352	0.000235709	0.0017995	0.000782032	0.000276071	0.000326887	7.68824e-05	0.000875095	1.03059e-05	0.000313719	2.28109e-08
9.03105e-05	0.000125305	0.00060907	0.000797731	9.40668e-06	0.00014347	0.000278774	1.00038e-05	5.12216e-05	0.00100421	0.000945923	3.39907e-05	0.00103988	0.000108677	9.62435e-05	0.000261696	0.000137707	1.17377e-05	8.13533e-05	0.000131652	0.000122189	3.9798e-05	0.000782458	0.000338082	4.23856e-05	1.84943e-05	2.08079e-05	0.000151849	3.14318e-06	4.91649e-05	6.55435e-05	0.00013507	5.95086e-05	0.000227238	0.000360265	2.03131e-08	0.00169242	0.000371474	0.000132244	0.00316219	0.00173501	0.00139316	0.000298232	0.000883093	0.00159173	0.00142359	0.000392767	1.89207e-05	0.00398163	4.30197e-05
1.55225e-05	0.00125566	5.09016e-05	0.000166119	2.52794e-06	0.000779528	2.27672e-05	3.36069e-05	1.3533e-05	7.62618e-06	7.84877e-06	0.000285144	0.000281604	1.43435e-05	0.000185843	0.000209258	2.91626e-05	0.000643033	0.000238611	2.45561e-06	0.000152507	9.52416e-05	3.7996e-05	0.000345859	0.000519387	0.000745632	5.22445e-05	0.00019881	7.82036e-10	0.000104899	0.000476014	1.31813e-05	0.000519299	8.81793e-05	2.37996e-05	0.000180137	8.90891e-05	4.3127e-05	5.51159e-06	0.000921352	2.33678e-06	0.000917365	0.00109399	0.000125266	2.71147e-06	0.000256927	0.00056668	0.000358114	0.000889704	3.80207e-07
8.85282e-05	0.000808295	0.000101927	0.000123283	0.000260433	0.000288427	9.50587e-05	2.53114e-05	7.3848e-09	1.16405e-05	0.000124897	0.000226478	3.23808e-06	1.63386e-08	0.000106399	0.000129911	8.57748e-06	0.00022753	0.000235361	3.09961e-05	0.000158186	3.19584e-06	7.10673e-05	0.000249535	0.000582634	0.000466774	3.59309e-06	0.000193033	4.29516e-05	7.55009e-05	0.000324253	1.6263e-06	0.000379132	2.99641e-05	0.000102151	0.000292139	9.67363e-05	1.18867e-06	1.43746e-05	0.000878223	1.36797e-05	0.000109747	0.00155523	7.82431e-07	7.37062e-07	0.000370137	1.4269e-06	6.33792e-05	0.00113663	0.000198135
3.13706e-05	3.30116e-07	0.000150873	4.8261e-05	7.94922e-06	8.41873e-08	0.000166894	3.92659e-05	0.000333953	0.00181194	0.0020912	4.09128e-05	5.60328e-05	0.00326425	2.84449e-06	1.41603e-05	4.22034e-06	0.0012819	0.000176542	0.000891535	0.000243895	0.00023247	0.000457347	0.000212165	1.2991e-07	0.000177958	0.000275153	0.000402082	0.000880223	1.03127e-06	1.9588e-05	5.24138e-05	3.95254e-06	0.000149714	0.000618223	0.000649365	0.000133516	6.78828e-05	2.06035e-05	0.00149978	0.000636717	0.000594834	0.000282238	0.000522369	4.72234e-05	7.77785e-05	2.62166e-05	0.00110711	0.00228275	2.5834e-05
0.000132635	2.51295e-07	8.46783e-05	5.06138e-05	7.32276e-05	1.57469e-05	0.000110923	8.00492e-05	7.23085e-05	9.05987e-05	0.00045668	1.97219e-07	2.46217e-07	0.000229543	0.000110293	0.000191445	0.000470798	0.000278827	0.000223226	7.85343e-05	0.000655085	1.10139e-05	0.000450116	0.000312514	3.78765e-05	0.000168958	8.6021e-05	0.000248381	1.75263e-05	5.3619e-05	0.000433156	0.000188234	0.000504059	3.31772e-05	0.000261124	0.000911896	3.93886e-05	0.000184435	0.000177	0.000217842	3.81745e-05	6.35289e-05	0.000958135	0.000253778	0.00109824	6.55673e-06	0.000183871	9.86521e-06	0.000131614	7.43954e-05
0.000100716	0.000211342	0.000138102	0.000818856	3.44557e-06	0.000733463	0.000516364	0.000368649	5.70097e-05	0.000149724	0.000821846	0.000828461	0.000178065	0.000613386	0.000785499	0.00101975	0.000161992	0.000733418	9.33979e-05	1.65919e-05	0.000562656	0.000183131	0.000735703	0.00155495	0.000161773	0.00161067	0.000182469	0.000871325	0.000653129	0.00111302	0.00164661	0.000158006	0.00208404	7.1797e-05	0.000283421	0.00171183	0.00109794	0.000900924	0.000501605	0.00191191	0.000766855	0.000913498	0.00250738	0.000362515	0.00208716	0.00198769	0.00106858	0.00106664	0.00298251	3.8862e-05
0.000234644	7.39717e-05	0.0006211	0.00116966	0.000143069	0.000246361	0.000458361	0.000269837	0.000693901	0.00198395	0.00220232	0.000216686	0.00184677	0.00157996	0.000785295	0.00125712	0.0016507	0.000852208	0.000585732	0.000406076	0.00137556	0.000380123	0.00101491	0.0016437	0.0001499	0.00121997	0.000164606	0.00101051	4.29973e-05	0.000730907	0.00131349	0.000679599	0.00234875	0.00032157	0.00186849	0.00171845	0.00233646	0.001968	0.00127033	0.00120196	0.00116576	0.000839259	0.000745893	0.00161091	0.00645705	0.00166289	0.00035956	0.000354272	0.00271172	0.000316874
3.00978e-05	0.000155885	4.01335e-05	0.000212985	9.048e-05	0.000557734	0.000321871	9.01639e-07	3.58356e-05	0.000455736	0.000424804	0.000111572	8.65707e-05	0.000587929	5.89141e-05	0.00123034	2.66537e-07	0.00101221	6.23471e-05	0.000168766	0.000731731	3.05304e-06	0.000742542	0.000976209	0.000376044	0.000474662	9.70465e-05	0.00357533	8.10671e-06	0.000713133	0.00103684	1.5222e-05	0.000906211	2.06614e-05	9.02662e-05	0.0020155	0.000259382	0.000939826	0.000194263	0.00414495	0.000942154	0.00150104	0.00451448	4.42831e-05	0.000382671	0.00216911	0.00100421	0.000157596	0.00646728	2.3926e-05
3.35103e-05	2.5957e-07	0.000111071	0.000696425	2.45831e-05	0.000111004	0.000108669	0.000128244	0.000192007	0.000371163	0.000139479	1.71925e-07	0.000289382	1.67954e-05	0.000541796	0.000303353	0.00016675	2.48321e-05	8.09469e-06	3.65443e-05	0.00141476	4.94014e-05	0.000560323	0.000331977	0.000100494	0.000216117	2.00179e-06	0.000600677	0.000167705	0.000189878	0.000222539	2.29322e-06	0.00039103	1.85014e-05	0.00161149	0.000608583	0.000494752	0.000277031	1.85979e-05	0.000201392	0.000270267	0.000366032	0.000256599	0.000190817	0.000844404	0.000338609	4.06626e-05	0.000224539	0.00148167	6.42156e-05
9.80067e-05	8.84335e-05	7.73205e-05	0.000334249	0.000148903	0.000354173	0.000144356	6.33598e-06	3.67883e-06	1.35356e-05	5.95068e-06	0.00175057	0.000123384	0.000918612	5.62245e-05	0.000151854	5.12071e-05	0.00240017	1.33448e-10	0.000690096	0.000485969	4.14453e-05	0.000300588	0.00104597	1.42998e-06	1.12023e-06	0.000194823	2.63003e-05	0.0011344	0.0011079	0.00106554	2.09121e-07	0.00046383	0.000303553	2.66066e-05	0.000363268	7.52208e-05	0.000779273	0.000246303	0.000418136	7.15761e-05	0.00107029	0.00145375	8.835e-05	0.000792935	0.00108874	0.00117996	0.000376907	0.00189638	0.000241307
2.66459e-05	0.000134651	4.69924e-05	0.000598788	3.3952e-05	0.000564739	0.000214074	8.70959e-05	9.91736e-06	9.44448e-05	0.000215387	0.000458115	2.2521e-05	0.000281103	0.00058925	0.00101321	3.89921e-05	0.000526969	0.000179539	2.12157e-05	0.000302099	1.94212e-06	0.000346683	0.000834541	0.00016151	0.00103433	7.9394e-06	0.000390148	0.000311599	0.000500629	0.00112838	0.000349384	0.00209927	6.45377e-07	0.000484538	0.0013649	5.25993e-05	0.000198193	0.000502872	0.000275619	0.000322604	0.00111172	0.00258781	0.000109195	0.000847972	0.00144177	0.000431767	0.0015774	0.00194384	2.8245e-07
0.000354133	0.000313367	0.000524733	0.00191794	4.80144e-05	0.000446891	0.000738232	0.000500579	0.000710047	0.000908241	0.00146619	0.000414193	0.000726897	0.00061244	0.00131911	0.00188909	0.000650706	0.000439156	0.000382098	2.71936e-06	0.00147036	0.000449863	0.00153658	0.00230218	0.0002787	0.00167462	4.45247e-05	0.00155837	0.000629006	0.000955675	0.00137534	0.000507071	0.00325317	3.16759e-05	0.00114118	0.00388801	0.00234769	0.00289173	0.000468785	0.00156217	0.00146406	0.00176233	0.00193857	0.00032729	0.0044307	0.00236498	0.000219467	0.0015451	0.00494529	4.56691e-05
3.06835e-05	0.000106567	7.65181e-05	0.000706484	3.93795e-06	0.000312992	0.000197834	0.000157462	0.000126311	2.60503e-05	6.59169e-05	0.000752471	0.00175849	0.00015671	0.000595176	0.000485622	4.71062e-05	0.000331641	4.12251e-05	0.000130358	8.83279e-05	0.000158307	1.71319e-05	0.000262219	5.7582e-05	0.000643862	0.000691692	0.0071336	4.15796e-05	0.00491338	0.000408037	0.000268702	0.000659817	0.000714395	0.000686716	3.86124e-06	0.00274692	0.000742108	0.000151668	2.04426e-07	0.000194769	3.09485e-10	3.42704e-05	0.000189216	0.000524483	0.00256593	2.28901e-05	0.00297131	0.00282039	7.67572e-05
3.78745e-05	7.1555e-05	0.000476956	0.00137117	5.24912e-05	0.000329794	0.000421663	0.000167666	0.000202006	0.000380039	0.00119436	0.000394281	0.000452341	0.000669329	0.000595303	0.00156326	0.000762522	0.000701007	0.000422024	0.00013503	0.000887103	0.000293805	0.000873577	0.00129257	0.000126546	0.00138191	0.000133484	0.000729464	0.00028079	0.000504261	0.00140628	0.00041267	0.00262718	0.00033389	0.000700324	0.00227524	0.000616951	0.00132856	0.0008172	0.00153457	0.000930798	0.00156424	0.00233806	0.000217328	0.00314539	0.00179196	0.000703494	0.00100245	0.0030724	0.000160025
0.000115474	0.000149708	0.000207413	0.000780874	2.97668e-07	0.000251533	0.00025057	4.88828e-05	8.12769e-05	0.000472223	0.000817054	0.000211108	6.58235e-05	0.000655313	0.000300835	0.00127336	5.28212e-05	0.000693959	0.000144235	3.26848e-07	2.34173e-05	0.000118598	0.000670414	0.000922664	0.000111531	0.00141537	7.14181e-07	0.000583296	0.000235917	6.80852e-05	0.000747225	0.000191228	0.00218953	2.69424e-05	0.000300953	0.00183316	0.000857414	0.00126029	0.000388343	0.00151516	0.000592069	0.00107365	0.00243834	0.0002829	0.00163903	0.00151771	0.000868248	0.000795313	0.00430656	9.16259e-06
0.000167809	0.000937197	1.6077e-05	0.000305307	0.000145294	0.00070136	8.49168e-05	0.000736675	8.86844e-05	1.5343e-06	6.54761e-06	0.00220728	2.62062e-05	0.000181489	0.000184269	0.000263737	0.000589962	0.000871696	0.000105742	1.60926e-05	0.000821264	1.70925e-05	1.6595e-05	0.000406433	0.000176008	0.000535951	0.000587513	0.000957511	0.000280432	0.0046912	0.0006961	7.13715e-05	0.000738489	2.72943e-06	1.15568e-05	0.00067984	0.00207165	0.00106271	0.000249777	0.000915377	0.000341023	0.000119273	0.000842445	0.000514247	0.000128054	0.00470142	0.000197375	0.000256194	0.0026543	0.000287501
9.95259e-06	0.000147483	6.94015e-05	0.000461075	3.35171e-05	0.000178245	5.12838e-05	4.57952e-06	6.40013e-05	3.3997e-06	0.000204216	0.00016517	0.000737133	7.48939e-06	0.000230583	0.000409416	8.28062e-05	4.65709e-05	0.000100164	1.2228e-06	0.00027024	0.000156771	0.000167556	0.000161876	9.58087e-05	0.000182969	2.47268e-05	0.00046593	0.000290843	0.000420049	0.00046289	0.000157656	0.000415844	0.000169533	0.000345112	4.59837e-05	0.000675811	0.000273326	0.000169184	0.000326574	0.000204771	9.93166e-06	0.000149211	6.78967e-05	0.00105662	0.00119062	0.000109367	0.000107465	0.00058682	0.000145595
6.00384e-05	1.81146e-05	1.21307e-06	5.67789e-07	6.19425e-06	0.000175032	1.33972e-05	3.42641e-05	2.77688e-06	5.75515e-05	4.34725e-05	2.07967e-08	0.000174227	1.00941e-05	0.000188507	8.66214e-07	4.83649e-05	3.34799e-06	4.72647e-06	1.36335e-05	6.5453e-05	4.692e-05	1.53997e-07	6.74748e-05	5.48423e-07	0.000147728	9.89098e-05	1.11515e-06	0.000372148	3.301e-06	2.12685e-05	8.46146e-07	0.000216873	3.63166e-05	0.000557233	4.86825e-06	9.0451e-05	6.19405e-05	2.07429e-05	0.000110992	2.41989e-05	9.58296e-06	6.89245e-06	4.54869e-05	9.85123e-05	0.000437019	1.19304e-08	0.000276567	2.17145e-05	4.30403e-06
7.7743e-06	1.74852e-05	2.01966e-06	2.04891e-05	1.42148e-06	1.60801e-06	8.30494e-05	0.000230312	1.41378e-05	0.000374645	4.0238e-05	0.000382977	2.24258e-06	3.57734e-05	1.60627e-05	0.000464367	7.35707e-05	3.06735e-05	0.00021176	1.45298e-05	2.32105e-05	0.000117988	9.80823e-05	9.26444e-05	0.000119905	0.000268947	0.00046909	0.000586528	0.000203199	3.72535e-05	0.000251182	6.85783e-05	0.000344191	7.33275e-05	3.07118e-05	0.00110557	0.000347161	5.45533e-05	4.16156e-05	0.00046695	0.000151044	9.88129e-07	0.00120842	0.000386182	0.000211078	6.48926e-05	0.000104664	2.7297e-05	0.00119407	4.88247e-05
1.06129e-05	6.63826e-05	0.000286545	0.000188207	1.57873e-05	7.15238e-05	7.02853e-05	0.000127166	1.15578e-05	0.00105884	0.000418875	6.44623e-05	0.000363637	0.000128516	0.00023569	0.00014646	6.98403e-05	3.65023e-05	6.51308e-05	1.33115e-05	0.000431149	2.20513e-05	0.000887481	0.000172056	0.000196855	7.14479e-06	0.000181452	0.00015047	2.40394e-06	1.88028e-05	1.03763e-05	6.53095e-05	4.47946e-05	0.000111539	0.00010306	2.87258e-06	0.000134239	0.000755464	0.000223927	0.00154874	0.00040007	1.90926e-05	0.000318434	0.00107154	0.00103755	0.000742849	0.00068778	0.000136819	0.00136484	0.000148258
5.34285e-07	1.1026e-06	3.96196e-05	0.000247039	2.84647e-06	0.000203302	0.000105206	0.00010697	7.25524e-05	0.000134438	0.000665359	5.56277e-05	0.000174621	0.000376627	0.000281384	0.000472941	0.00122638	0.000618043	0.000125739	0.000122202	0.000830913	0.000230179	0.000116559	0.000232011	9.51601e-06	0.000460977	0.000190236	0.000993436	0.00011847	3.41596e-05	0.000552056	0.000437534	0.000599401	0.000607205	0.000189732	4.555e-05	0.000379039	0.000539612	0.00040212	0.000243907	0.000170384	0.000536434	0.000280757	1.14729e-05	0.000684503	3.7792e-05	2.29133e-06	0.000187871	0.000544683	4.3378e-05
0.000320736	8.84534e-05	1.86083e-05	2.05646e-06	0.000337635	2.15157e-06	8.66563e-07	6.48964e-05	7.46297e-07	7.07113e-06	0.0002706	1.85145e-07	0.000249625	1.84158e-05	2.23432e-05	1.36387e-05	0.00082712	0.000301614	6.63242e-05	1.78738e-06	0.00114162	7.53414e-05	0.000112741	2.29415e-05	9.85034e-05	5.64439e-05	0.000490283	5.32576e-05	0.000120313	1.65091e-06	0.000179672	1.84298e-06	1.49761e-08	0.000311327	0.000114671	1.43249e-06	5.7158e-05	0.000117937	9.26985e-05	5.28747e-06	7.04771e-05	4.17223e-05	4.70581e-05	4.84846e-05	0.000303153	2.66828e-05	0.000276871	3.46593e-05	0.000405344	0.000381585
6.69503e-05	6.41012e-05	4.03083e-06	0.000280686	0.000221539	8.03592e-05	0.000229448	3.86724e-05	1.49984e-05	0.000272433	1.13469e-05	0.000207104	3.22252e-05	5.34774e-05	0.000233519	0.000948054	6.62744e-08	0.000361344	6.94715e-05	0.000142103	1.11907e-06	2.49452e-05	5.49801e-05	0.000484347	0.000147583	0.00228414	0.000166785	0.00133212	0.000171632	0.000344576	0.000279041	8.66499e-05	0.0025143	6.99772e-07	0.000328563	0.00154231	9.99515e-05	0.000111448	3.53055e-05	0.000611257	0.000112819	0.000338063	0.00221507	0.000135408	1.52556e-05	0.000275942	0.00029036	0.00201458	0.00321565	1.0462e-05
0.000265506	0.000295988	0.00044526	0.0015546	2.23659e-05	0.000664484	0.000711201	0.000170497	0.000315612	0.000362628	0.00171953	0.000286452	0.00081563	0.00102378	0.00113596	0.00161768	0.00107804	0.000864792	0.000385853	8.85455e-05	0.00107165	0.000405648	0.000846281	0.00189899	0.000264973	0.00154778	0.00030145	0.000969371	0.000660659	0.000696878	0.00183082	0.000681434	0.00285017	0.000432002	0.00111625	0.00207885	0.00118056	0.00160168	0.00136439	0.00200357	0.000857424	0.00124472	0.00250598	0.000520791	0.00446414	0.00229425	0.000846352	0.000793604	0.00340734	0.000248167
0.000152425	0.000208203	0.000477178	0.00156812	1.60259e-05	0.000480687	0.000913726	0.000161657	0.00021305	0.00136931	0.000996954	7.26214e-05	0.000423688	0.000832808	0.000615028	0.00203671	7.18234e-05	0.0011852	0.000200787	5.09951e-05	0.000580987	0.000187017	0.00128205	0.00182567	0.000117231	0.00158415	1.01846e-07	0.00169671	0.000320207	0.000817897	0.0011871	0.000126454	0.00287489	6.95112e-06	0.000904808	0.00259988	0.00225843	0.0028818	0.000401448	0.00327646	0.00133893	0.00253648	0.00310182	0.00116504	0.00373178	0.0033432	0.0017134	0.00117575	0.00904838	1.17881e-05
4.3718e-05	0.000320312	0.000417226	0.000854246	6.8217e-05	8.74648e-05	0.000864345	4.62637e-05	0.000199123	0.00269444	0.000695863	3.90893e-05	1.29384e-07	0.000846627	2.95977e-06	0.00128077	1.735e-06	0.00102466	0.000111981	0.000506911	0.00159039	0.000296498	0.000954312	0.00145772	0.000279458	0.000470704	0.000124914	0.00335791	6.56489e-06	0.00120459	0.000531636	0.000136656	0.00158324	4.28187e-05	4.3979e-05	0.0031419	0.0020527	0.00307183	1.99326e-05	0.00315913	0.00160798	0.00288454	0.00257331	0.000593503	0.00189246	0.00242592	0.00124756	0.000422354	0.0117099	3.8688e-05
0.000255889	0.000283629	0.000481849	0.00185366	0.000149339	0.00035961	0.000584821	0.000715522	0.000495583	0.00106679	0.00240648	0.000596422	0.00188531	0.000680456	0.00213679	0.00146271	0.000595776	0.000433953	0.000743932	7.32197e-05	0.00138655	0.000292162	0.00150665	0.00220334	0.000229791	0.00147585	0.00037487	0.000771015	0.00112566	0.000975893	0.00170997	0.00038719	0.00344728	8.63182e-05	0.00208664	0.00354875	0.00274297	0.00159557	0.000848243	0.00101105	0.00116134	0.000661698	0.00203762	0.000585554	0.0066849	0.00296137	0.000183302	0.000808677	0.00387764	0.000270991
1.19974e-05	1.18853e-05	4.2566e-07	2.76809e-05	0.000140159	5.98517e-05	2.20848e-05	0.000244426	2.99255e-06	2.00511e-05	3.86407e-05	9.90126e-05	3.00033e-05	0.000101879	5.88936e-05	0.000387249	0.000581101	0.000190909	4.13936e-05	7.85637e-05	0.000785045	0.000207228	2.8327e-05	3.48205e-07	1.59847e-05	0.000735998	3.76468e-05	0.00062304	7.596e-06	1.61389e-05	0.000236724	0.000218838	0.000259792	0.000656929	2.24764e-05	2.17464e-05	0.000110251	1.72627e-05	6.99058e-05	0.000206408	4.24457e-05	0.000257722	0.000602769	0.000136311	0.000102586	3.29642e-05	0.000168965	0.000224765	0.000253937	1.48212e-07
3.38319e-07	0.000134621	0.000112663	0.000380166	1.54977e-05	0.000293958	0.000293563	9.21625e-07	1.10755e-05	0.000500819	0.00091227	0.000151449	0.000222922	0.000587129	8.76385e-05	0.000905684	0.000363208	0.000960908	0.000337357	0.000291291	0.000123599	9.43435e-05	0.00036566	0.000535468	0.00044452	0.000915132	2.08306e-05	0.00108972	0.000311202	0.000312981	0.00085111	0.000463591	0.00103293	0.000370803	0.000276484	0.000816831	8.42864e-05	0.000262016	0.00101752	0.000865105	0.00045493	0.000317512	0.00216421	9.6963e-05	0.00100795	0.000920313	0.000392781	0.000586575	0.00254917	0.000593342
0.000155865	7.81484e-05	1.57141e-07	0.000460344	0.000471574	0.000564264	0.000461809	7.98702e-07	5.27644e-06	8.43937e-07	1.45047e-05	2.87338e-05	4.77142e-05	0.000264926	0.000432758	0.00125496	0.000731154	0.00102936	2.97255e-07	0.000172347	0.00198039	0.000272305	5.71274e-05	0.000506769	0.000192413	0.00235183	4.48713e-05	0.002744	0.000140091	0.000399938	0.000811883	8.707e-05	0.00155086	0.000772687	2.94888e-05	0.00177712	0.00016987	0.000640092	0.000184352	0.00034409	0.000205896	0.00147284	0.000739073	0.00071439	0.000451417	0.000513851	0.00135084	0.00301505	0.00189812	2.26263e-05
8.41075e-07	0.000287106	3.96709e-05	0.000536417	2.29982e-06	0.000555981	0.000136856	1.47965e-05	7.42409e-07	0.000100154	0.000161065	0.000415279	5.13148e-06	0.000404128	2.51963e-05	0.00132408	0.00019853	0.000905386	0.000109967	1.21864e-05	0.000615214	0.000319306	0.000778147	0.000425016	0.000533315	0.000752776	6.70721e-05	0.00119929	1.24157e-06	0.000846427	0.00158601	0.000137311	0.000648527	1.18186e-06	0.000201794	0.000888655	0.00057392	0.000746562	0.000286604	0.00222044	0.000803688	0.00106843	0.00240276	7.77925e-05	0.000284867	0.00173219	0.000132435	0.000158439	0.00375914	0.000263163
0.000153174	3.41984e-05	2.30419e-05	1.51937e-08	3.11487e-06	4.6194e-05	3.60433e-05	0.00115392	2.80427e-05	0.00190952	4.55776e-05	2.60178e-05	3.05749e-07	7.86271e-06	1.02649e-05	0.000182864	0.000102333	0.000612135	5.49237e-06	2.89516e-05	0.000687243	2.83421e-05	0.000545392	0.000424933	7.32062e-06	0.00038639	8.2413e-05	1.18398e-06	0.000279735	0.000494237	0.000242885	3.8237e-05	0.000116618	0.000839481	0.000124896	0.00117528	4.80114e-05	4.94094e-05	1.11125e-07	7.37922e-05	7.47496e-05	3.38605e-05	1.08974e-07	0.00121661	0.000106969	3.95761e-05	7.42149e-07	0.000151662	0.000553938	5.01411e-05
4.4569e-07	5.72211e-05	7.54655e-05	0.000177697	1.00546e-05	3.30562e-05	3.56019e-05	0.000201583	6.27555e-05	1.27288e-06	0.00180782	5.7277e-06	0.000175966	0.00037488	2.57901e-07	0.000178156	4.70117e-05	0.000366009	5.85152e-08	2.19681e-05	0.000353093	0.000222703	9.2899e-05	0.000116302	4.96265e-05	0.000117907	9.34211e-05	0.000721475	0.000313787	7.27889e-05	4.90253e-05	1.45209e-05	5.95942e-05	0.000398854	3.80504e-06	7.71986e-05	0.00678585	0.00101939	3.01854e-05	0.00266436	0.000701124	0.000869702	8.63144e-06	0.00023725	0.000300098	0.000589946	0.000233017	5.144e-05	0.000796612	4.27972e-07
0.000537644	0.000267348	0.000636593	0.0019886	8.38406e-06	0.000597109	0.000970169	0.000604595	0.000611707	0.00231292	0.00219805	9.92995e-05	0.00117695	0.00132096	0.00178458	0.00197734	0.000239208	0.00111472	0.000616789	3.56444e-05	0.000610503	0.000160826	0.00163056	0.0024044	0.000222201	0.00217366	0.000149362	0.000584088	0.00117918	0.00072034	0.00145732	0.000195561	0.00392115	1.54428e-05	0.00262975	0.00385667	0.00252983	0.002464	0.00102754	0.00238347	0.00154312	0.00225778	0.00272981	0.00165745	0.00660969	0.00346933	0.00227635	0.00113278	0.00721806	1.71511e-05
1.87765e-06	5.17244e-05	5.84861e-05	0.000245115	5.19422e-05	2.28205e-05	0.000322614	1.28214e-05	0.000147635	0.000968098	0.00026283	0.000171528	1.60374e-05	0.000556696	2.0886e-06	0.00127867	1.00503e-07	0.000241051	0.000208786	1.75319e-05	9.01046e-05	2.75026e-05	0.000690801	0.000509948	0.000119561	0.00069103	6.00402e-05	6.0841e-05	0.000115375	3.63723e-06	4.22359e-05	5.82765e-05	0.000744458	0.000181713	6.60925e-05	0.000788377	0.000898979	0.00117828	0.000156896	0.00266479	0.00124835	0.000997948	0.00129034	0.000733249	0.000774566	0.000535461	0.00239298	0.000145409	0.00359532	1.95211e-05
0.000211342	0.000129654	2.9349e-05	0.000112728	1.34772e-05	3.45276e-05	0.000224494	0.00071085	0.000297826	0.00253636	4.89381e-05	0.000357477	1.34515e-05	6.28076e-08	0.000175502	0.000229891	0.000158851	0.000129489	5.06005e-06	0.000638005	0.00440504	1.53217e-05	0.00157629	0.000614043	5.75616e-05	0.000198052	0.000104632	0.0033699	0.000546089	0.00261095	4.27217e-05	0.000248837	0.000287947	0.000463811	4.16109e-06	0.000495141	0.000754585	0.00381491	4.81908e-05	0.000334861	0.000816504	0.000315088	1.33642e-06	0.000819495	0.00096021	0.000658737	0.000190697	1.34909e-05	0.00226949	1.12532e-07
1.36867e-05	0.000357337	0.00023411	0.00134993	2.62208e-05	0.000328048	0.000364972	0.000186958	0.000205965	0.000915132	0.000558505	0.000371676	0.000348956	0.000238828	0.000378316	0.00137725	0.000331406	0.000430601	0.000107255	0.000103309	0.00147404	0.000438586	0.00099193	0.00112372	0.000187343	0.000888579	8.01338e-07	0.00192473	8.15092e-05	0.00113569	0.00103601	0.000187594	0.00137156	2.55467e-05	0.000688003	0.00167133	0.00178701	0.00150132	0.000103613	0.00200704	0.00101174	0.00101726	0.00186067	0.000405532	0.00162736	0.00277709	0.000186843	0.000277337	0.00572462	0.000160255
5.41065e-07	5.88129e-06	4.9054e-06	3.8881e-06	0.000110205	2.33696e-05	1.12279e-06	0.000425029	7.3533e-06	5.43438e-05	0.000406061	7.23277e-05	2.38415e-05	5.00868e-05	0.000350788	4.05501e-05	0.000180065	0.000181575	4.87337e-06	0.000328243	5.68536e-07	4.33776e-05	1.37609e-05	2.22278e-05	2.86994e-05	1.24525e-05	0.000107238	8.03688e-05	1.19479e-08	3.02848e-05	4.66193e-05	6.23911e-05	7.47156e-05	2.82472e-05	0.00015368	0.000207775	5.90399e-06	0.000894377	7.28237e-05	0.000134282	7.85592e-05	0.000143239	4.6433e-05	9.05138e-05	1.78157e-05	6.8991e-05	0.000224134	6.3914e-05	9.10038e-05	0.000311501
0.000238505	0.000101135	3.84092e-05	7.16317e-05	0.000364366	1.27976e-05	0.000159075	2.72651e-06	3.02188e-05	0.00248494	0.000164146	0.00030289	0.00118119	0.000134972	0.000301143	0.000432518	8.84056e-05	0.000111462	0.000173332	0.000129346	0.000249904	2.2665e-05	0.000401688	9.36083e-06	0.000270873	0.000230157	0.00036298	2.5007e-05	0.00121504	1.66169e-05	2.36135e-06	0.000327249	0.000310673	0.000173533	0.000164266	9.99094e-06	0.000145766	0.000753605	0.000160543	0.000639573	0.000431974	3.95483e-05	0.000143744	0.000632108	0.00050104	0.000988004	0.000350871	8.24325e-05	0.00267457	0.000127394
0.000374909	2.4151e-05	6.01713e-07	0.000363826	0.000674728	0.000999545	6.13899e-06	5.51038e-05	7.88774e-06	0.00121377	0.000129491	0.000150927	8.32192e-05	1.54826e-05	0.000257707	9.50139e-05	0.000504603	0.000254449	5.89825e-05	0.000252774	0.000103426	0.000194415	0.000800578	1.49581e-05	2.07378e-06	0.003382	0.00014673	1.89307e-05	0.00019233	4.53123e-05	0.000550999	0.000153941	0.000149562	0.000806721	0.000215787	0.000313506	0.000629593	0.000629003	0.000460876	0.000105716	5.53377e-05	0.000850806	2.79574e-07	8.91415e-06	0.000124708	2.45973e-06	0.000550609	0.00825202	1.84456e-05	8.56507e-05
[truncated: 125 more columns]

## Sheet: Fig1d_wji_vs_distance_TY
Wji	Distance	Reaches
0		reachFN1
0.00987452	0	reachFN1
0.0068612	0	reachFN1
0.0012055	1442.22	reachFN1
0.000411506	400	reachFN1
0.00768074	400	reachFN1
0.000601836	1131.37	reachFN1
0.00039536	800	reachFN1
0.000502424	894.427	reachFN1
0.00265269	894.427	reachFN1
9.45417e-05	894.427	reachFN1
6.67686e-08	1200	reachFN1
3.91725e-06	1200	reachFN1
0.000152422	894.427	reachFN1
0.000162265	2000	reachFN1
2.00585e-05	2000	reachFN1
0.00163727	1131.37	reachFN1
0.000185855	1649.24	reachFN1
0.000176345	1442.22	reachFN1
1.83249e-05	1442.22	reachFN1
0.0028127	1788.85	reachFN1
7.02216e-05	894.427	reachFN1
0.000615258	2154.07	reachFN1
0.000573162	2000	reachFN1
0.00718454	1697.06	reachFN1
0.000241137	565.685	reachFN1
0.000787027	565.685	reachFN1
0.000332363	565.685	reachFN1
0.000159186	1442.22	reachFN1
0.000529441	1264.91	reachFN1
0.000871308	1200	reachFN1
0.00411809	1200	reachFN1
0.000316548	1200	reachFN1
0.00145184	1264.91	reachFN1
0.000242119	1788.85	reachFN1
0.000655556	1442.22	reachFN1
6.51681e-05	1649.24	reachFN1
4.45626e-07	1200	reachFN1
0.000460605	1200	reachFN1
0.000292731	1264.91	reachFN1
0.00507937	400	reachFN1
0.000294043	1697.06	reachFN1
0.0012191	1697.06	reachFN1
0.000398106	565.685	reachFN1
0.0012166	565.685	reachFN1
0.000649544	894.427	reachFN1
9.17917e-05	1131.37	reachFN1
0.00079823	2039.61	reachFN1
4.14423e-06	1600	reachFN1
0.000288585	1600	reachFN1
0.00220346	1600	reachFN1
0.000543294	800	reachFN1
0.00115914	1131.37	reachFN1
0.00119391	1131.37	reachFN1
0.00458697	400	reachFN1
0.00313444	400	reachFN1
0.00901183	400	reachFN1
0.000162749	1442.22	reachFN1
0.00117699	1442.22	reachFN1
3.10973e-05	1442.22	reachFN1
7.18487e-05	1442.22	reachFN1
0.000473507	1697.06	reachFN1
8.66828e-07	1697.06	reachFN1
0.00390209	2039.61	reachFN1
0.00103494	2039.61	reachFN1
0.000452734	2154.07	reachFN1
0.000324167	2332.38	reachFN1
0.00345932	2000	reachFN1
0.00195915	2000	reachFN1
0.00151653	2561.25	reachFN1
0.00534506	1649.24	reachFN1
0.00158353	1600	reachFN1
0.00159641	1600	reachFN1
0.00671643	1600	reachFN1
0.00231092	2529.82	reachFN1
0.000245586	2529.82	reachFN1
0.000527813	1649.24	reachFN1
0.00617742	2433.11	reachFN1
0.00012504	1788.85	reachFN1
0.000391049	2400	reachFN1
9.20407e-05	2000	reachFN1
0.000175686	2433.11	reachFN1
0.000458044	2262.74	reachFN1
0.000561881	2262.74	reachFN1
0.000264545	2529.82	reachFN1
3.949e-05	2332.38	reachFN1
0.00178802	0	reachFN1
0.000239675	1442.22	reachFN1
0.000167402	1442.22	reachFN1
0.000413118	1131.37	reachFN1
0.000995451	800	reachFN1
1.75529e-05	1200	reachFN1
0.00016693	800	reachFN1
0.000103389	1600	reachFN1
0.000846544	1600	reachFN1
9.59951e-07	2000	reachFN1
0.000743712	1131.37	reachFN1
5.28823e-06	1264.91	reachFN1
0.000598374	1264.91	reachFN1
0.000733187	894.427	reachFN1
9.65979e-05	894.427	reachFN1
0.000194471	894.427	reachFN1
3.43898e-05	565.685	reachFN1
0.00340662	565.685	reachFN1
0.00217578	565.685	reachFN1
0.000582795	400	reachFN1
0.000241877	400	reachFN1
0.000765744	1697.06	reachFN1
0.000526064	1697.06	reachFN1
0.00132975	1442.22	reachFN1
0.000182959	894.427	reachFN1
0.000106751	1264.91	reachFN1
0.000386234	1264.91	reachFN1
3.61705e-05	1264.91	reachFN1
9.08532e-05	1264.91	reachFN1
0.000287832	1264.91	reachFN1
5.23167e-05	1264.91	reachFN1
6.12858e-06	1442.22	reachFN1
0.000587875	1649.24	reachFN1
0.000288169	1200	reachFN1
4.73368e-05	894.427	reachFN1
0.000736766	565.685	reachFN1
0.00066077	1442.22	reachFN1
0.00118583	1442.22	reachFN1
0.00144781	1442.22	reachFN1
4.33314e-05	400	reachFN1
1.25609e-05	1697.06	reachFN1
0.000200613	894.427	reachFN1
0.000909259	1264.91	reachFN1
0.00108805	1649.24	reachFN1
0.00183469	1649.24	reachFN1
0.000380711	2039.61	reachFN1
0.00166415	1200	reachFN1
0.00138182	1200	reachFN1
1.61964e-06	894.427	reachFN1
0.000812377	894.427	reachFN1
1.16997e-05	800	reachFN1
9.90535e-06	1131.37	reachFN1
9.24355e-05	1131.37	reachFN1
0.00122425	1697.06	reachFN1
0.00235747	2000	reachFN1
7.44448e-06	2332.38	reachFN1
0.00111919	2000	reachFN1
0.00141702	2561.25	reachFN1
0.00173134	1788.85	reachFN1
0.000264931	1788.85	reachFN1
0.000973067	1649.24	reachFN1
0.000816498	1649.24	reachFN1
0.0007194	1649.24	reachFN1
0.000206787	1649.24	reachFN1
3.52326e-06	1649.24	reachFN1
2.79527e-06	2433.11	reachFN1
7.52502e-05	1788.85	reachFN1
0.00360034	1788.85	reachFN1
2.85562e-05	1788.85	reachFN1
0.0181062	1788.85	reachFN1
6.36372e-05	2000	reachFN1
0.000153289	2262.74	reachFN1
1.36693e-05	2561.25	reachFN1
0.00100341	2884.44	reachFN1
0.000119858	894.427	reachFN1
6.4205e-05	894.427	reachFN1
0.000337821	1649.24	reachFN1
0.00368683	2000	reachFN1
0.00301347	1131.37	reachFN1
0.00240568	400	reachFN1
0.00221811	565.685	reachFN1
0.000386602	1264.91	reachFN1
2.50945e-05	565.685	reachFN1
0.000488017	1600	reachFN1
0.000220328	800	reachFN1
0.000186613	800	reachFN1
0.00390562	2000	reachFN1
0.00245233	2262.74	reachFN1
5.4553e-06	2561.25	reachFN1
0.0105598	0	reachFN1
0		reachFN1
0.0105239	0	reachFN1
0.00066641	1442.22	reachFN1
0.00108452	400	reachFN1
0.00160506	400	reachFN1
0.000491187	1131.37	reachFN1
2.28934e-05	800	reachFN1
0.00079103	894.427	reachFN1
0.00905634	894.427	reachFN1
0.00250675	894.427	reachFN1
0.00165497	1200	reachFN1
0.00244689	1200	reachFN1
0.00427842	894.427	reachFN1
0.00125982	2000	reachFN1
8.09892e-05	2000	reachFN1
0.000486593	1131.37	reachFN1
0.000190368	1649.24	reachFN1
1.02581e-05	1442.22	reachFN1
0.000194154	1442.22	reachFN1
0.00459357	1788.85	reachFN1
4.53703e-06	894.427	reachFN1
0.00217712	2154.07	reachFN1
3.09708e-06	2000	reachFN1
0.00372175	1697.06	reachFN1
0.00152805	565.685	reachFN1
0.000134717	565.685	reachFN1
0.00214193	565.685	reachFN1
0.000739283	1442.22	reachFN1
0.000395138	1264.91	reachFN1
0.00151265	1200	reachFN1
0.00643814	1200	reachFN1
0.00274503	1200	reachFN1
0.00213749	1264.91	reachFN1
0.000167968	1788.85	reachFN1
0.000265213	1442.22	reachFN1
0.000219375	1649.24	reachFN1
0.000337275	1200	reachFN1
9.44309e-05	1200	reachFN1
0.000149108	1264.91	reachFN1
0.0133508	400	reachFN1
1.33593e-05	1697.06	reachFN1
0.000161496	1697.06	reachFN1
0.00104452	565.685	reachFN1
1.86618e-05	565.685	reachFN1
8.08157e-05	894.427	reachFN1
0.000225859	1131.37	reachFN1
0.00333523	2039.61	reachFN1
0.000147745	1600	reachFN1
0.000296302	1600	reachFN1
0.00076465	1600	reachFN1
0.000428018	800	reachFN1
0.000472286	1131.37	reachFN1
0.00390101	1131.37	reachFN1
0.00432475	400	reachFN1
0.00759881	400	reachFN1
0.0069135	400	reachFN1
1.84705e-05	1442.22	reachFN1
0.00116184	1442.22	reachFN1
2.13217e-05	1442.22	reachFN1
1.52752e-05	1442.22	reachFN1
0.000239839	1697.06	reachFN1
0.00106532	1697.06	reachFN1
0.00436129	2039.61	reachFN1
0.00439994	2039.61	reachFN1
5.19848e-05	2154.07	reachFN1
0.000345273	2332.38	reachFN1
0.003589	2000	reachFN1
0.0010271	2000	reachFN1
0.00184286	2561.25	reachFN1
0.00427845	1649.24	reachFN1
0.00123948	1600	reachFN1
0.00115703	1600	reachFN1
0.00165756	1600	reachFN1
0.00524174	2529.82	reachFN1
1.14411e-05	2529.82	reachFN1
0.000891242	1649.24	reachFN1
0.010409	2433.11	reachFN1
0.000694108	1788.85	reachFN1
0.00365763	2400	reachFN1
1.08282e-05	2000	reachFN1
0.000644614	2433.11	reachFN1
0.00013949	2262.74	reachFN1
0.000789042	2262.74	reachFN1
0.00164437	2529.82	reachFN1
0.00165825	2332.38	reachFN1
0.00394788	0	reachFN1
0.000957753	1442.22	reachFN1
0.00036925	1442.22	reachFN1
0.00120204	1131.37	reachFN1
0.00121467	800	reachFN1
0.00112504	1200	reachFN1
0.000491847	800	reachFN1
0.00518382	1600	reachFN1
0.000305691	1600	reachFN1
0.000334744	2000	reachFN1
0.000464049	1131.37	reachFN1
0.000542123	1264.91	reachFN1
0.00040569	1264.91	reachFN1
0.000128772	894.427	reachFN1
0.00355946	894.427	reachFN1
0.0012685	894.427	reachFN1
0.00047515	565.685	reachFN1
0.00252849	565.685	reachFN1
0.00103594	565.685	reachFN1
0.000799502	400	reachFN1
0.000833469	400	reachFN1
0.000176069	1697.06	reachFN1
0.00586528	1697.06	reachFN1
0.00110782	1442.22	reachFN1
0.000659053	894.427	reachFN1
0.000432179	1264.91	reachFN1
0.00131165	1264.91	reachFN1
0.00357335	1264.91	reachFN1
0.000474867	1264.91	reachFN1
3.46453e-06	1264.91	reachFN1
0.000226123	1264.91	reachFN1
0.000143075	1442.22	reachFN1
0.00140239	1649.24	reachFN1
0.00010027	1200	reachFN1
4.02055e-06	894.427	reachFN1
0.00160809	565.685	reachFN1
9.65804e-05	1442.22	reachFN1
0.0017619	1442.22	reachFN1
0.00223937	1442.22	reachFN1
0.000114282	400	reachFN1
1.30754e-06	1697.06	reachFN1
9.90978e-05	894.427	reachFN1
0.00296064	1264.91	reachFN1
3.90646e-05	1649.24	reachFN1
0.00322355	1649.24	reachFN1
0.00120224	2039.61	reachFN1
0.00288211	1200	reachFN1
0.00623481	1200	reachFN1
0.000265466	894.427	reachFN1
0.00161167	894.427	reachFN1
0.000550936	800	reachFN1
0.000472448	1131.37	reachFN1
5.9812e-05	1131.37	reachFN1
0.000254122	1697.06	reachFN1
0.00283086	2000	reachFN1
0.000334592	2332.38	reachFN1
0.00232641	2000	reachFN1
0.00249068	2561.25	reachFN1
0.000838519	1788.85	reachFN1
0.00382927	1788.85	reachFN1
0.00178208	1649.24	reachFN1
0.00208982	1649.24	reachFN1
0.000936764	1649.24	reachFN1
0.00210579	1649.24	reachFN1
3.12553e-05	1649.24	reachFN1
9.21075e-05	2433.11	reachFN1
0.000879114	1788.85	reachFN1
0.00411334	1788.85	reachFN1
1.88625e-08	1788.85	reachFN1
0.0132644	1788.85	reachFN1
0.000352804	2000	reachFN1
0.000242089	2262.74	reachFN1
8.9845e-06	2561.25	reachFN1
0.00156978	2884.44	reachFN1
8.17739e-05	894.427	reachFN1
0.000291177	894.427	reachFN1
0.00108314	1649.24	reachFN1
0.00606078	2000	reachFN1
0.000704607	1131.37	reachFN1
0.00390182	400	reachFN1
0.00182722	565.685	reachFN1
0.000370924	1264.91	reachFN1
3.43186e-05	565.685	reachFN1
7.72433e-05	1600	reachFN1
1.39731e-05	800	reachFN1
1.28292e-05	800	reachFN1
0.00433215	2000	reachFN1
0.00194438	2262.74	reachFN1
2.51845e-05	2561.25	reachFN1
0.00621969	0	reachFN1
0.0117132	0	reachFN1
0		reachFN1
2.52882e-05	1442.22	reachFN1
3.47883e-05	400	reachFN1
0.00168838	400	reachFN1
2.77024e-08	1131.37	reachFN1
0.000442256	800	reachFN1
0.000577733	894.427	reachFN1
0.00135658	894.427	reachFN1
0.00017924	894.427	reachFN1
0.000328983	1200	reachFN1
0.000161093	1200	reachFN1
0.000561881	894.427	reachFN1
0.000777544	2000	reachFN1
0.00519132	2000	reachFN1
0.00128119	1131.37	reachFN1
0.000420662	1649.24	reachFN1
0.000643624	1442.22	reachFN1
0.000204568	1442.22	reachFN1
0.000143727	1788.85	reachFN1
0.000107495	894.427	reachFN1
0.000403657	2154.07	reachFN1
4.52886e-06	2000	reachFN1
0.0028073	1697.06	reachFN1
0.00282148	565.685	reachFN1
2.78574e-05	565.685	reachFN1
0.00175518	565.685	reachFN1
9.35718e-05	1442.22	reachFN1
0.000889092	1264.91	reachFN1
1.73021e-07	1200	reachFN1
0.00144976	1200	reachFN1
0.00108614	1200	reachFN1
0.00353295	1264.91	reachFN1
0.00159688	1788.85	reachFN1
0.000194492	1442.22	reachFN1
7.36269e-05	1649.24	reachFN1
0.00047885	1200	reachFN1
8.13827e-05	1200	reachFN1
0.000292704	1264.91	reachFN1
0.00948899	400	reachFN1
1.06828e-06	1697.06	reachFN1
1.86276e-05	1697.06	reachFN1
0.000222732	565.685	reachFN1
0.00131681	565.685	reachFN1
0.00127602	894.427	reachFN1
7.01282e-05	1131.37	reachFN1
0.00145824	2039.61	reachFN1
0.00355639	1600	reachFN1
2.05116e-06	1600	reachFN1
0.00512904	1600	reachFN1
1.78525e-05	800	reachFN1
0.00539111	1131.37	reachFN1
0.000696716	1131.37	reachFN1
0.000795742	400	reachFN1
0.0128216	400	reachFN1
0.00158852	400	reachFN1
0.000239543	1442.22	reachFN1
0.00110261	1442.22	reachFN1
0.0015403	1442.22	reachFN1
1.15715e-05	1442.22	reachFN1
0.00312748	1697.06	reachFN1
0.00021648	1697.06	reachFN1
0.000235075	2039.61	reachFN1
0.000482085	2039.61	reachFN1
0.00012889	2154.07	reachFN1
7.94278e-05	2332.38	reachFN1
0.000862212	2000	reachFN1
0.000798977	2000	reachFN1
0.000164432	2561.25	reachFN1
0.00235111	1649.24	reachFN1
0.00137439	1600	reachFN1
6.5411e-06	1600	reachFN1
0.000472039	1600	reachFN1
0.00100951	2529.82	reachFN1
0.000840619	2529.82	reachFN1
0.000381787	1649.24	reachFN1
0.0011305	2433.11	reachFN1
2.24274e-05	1788.85	reachFN1
0.00455636	2400	reachFN1
0.000131459	2000	reachFN1
1.51232e-05	2433.11	reachFN1
6.08237e-06	2262.74	reachFN1
0.000845676	2262.74	reachFN1
0.000133653	2529.82	reachFN1
0.000607603	2332.38	reachFN1
0.00416763	0	reachFN1
0.00083213	1442.22	reachFN1
2.83241e-05	1442.22	reachFN1
1.21302e-07	1131.37	reachFN1
0.00115762	800	reachFN1
0.00182824	1200	reachFN1
5.07433e-05	800	reachFN1
0.000860874	1600	reachFN1
4.44138e-05	1600	reachFN1
1.18142e-05	2000	reachFN1
9.06738e-05	1131.37	reachFN1
0.00251983	1264.91	reachFN1
0.00266391	1264.91	reachFN1
1.7044e-05	894.427	reachFN1
0.000136361	894.427	reachFN1
0.000197934	894.427	reachFN1
1.46666e-05	565.685	reachFN1
0.00402187	565.685	reachFN1
0.00318674	565.685	reachFN1
0.000357099	400	reachFN1
0.00151644	400	reachFN1
7.11016e-05	1697.06	reachFN1
0.000612705	1697.06	reachFN1
0.00121555	1442.22	reachFN1
0.000153717	894.427	reachFN1
1.84325e-05	1264.91	reachFN1
0.000239397	1264.91	reachFN1
0.00101887	1264.91	reachFN1
0.00075181	1264.91	reachFN1
0.00188745	1264.91	reachFN1
0.000110418	1264.91	reachFN1
0.000376678	1442.22	reachFN1
0.00319858	1649.24	reachFN1
0.000193847	1200	reachFN1
4.18183e-05	894.427	reachFN1
0.00105255	565.685	reachFN1
0.000603408	1442.22	reachFN1
0.000386852	1442.22	reachFN1
0.00250058	1442.22	reachFN1
0.000597089	400	reachFN1
0.000681823	1697.06	reachFN1
6.06101e-05	894.427	reachFN1
0.00106231	1264.91	reachFN1
0.000954675	1649.24	reachFN1
0.00437022	1649.24	reachFN1
2.41634e-06	2039.61	reachFN1
0.00250004	1200	reachFN1
0.00127575	1200	reachFN1
0.000333775	894.427	reachFN1
0.000899047	894.427	reachFN1
9.31583e-06	800	reachFN1
0.000139714	1131.37	reachFN1
0.000116385	1131.37	reachFN1
0.00101402	1697.06	reachFN1
0.000842459	2000	reachFN1
6.85775e-05	2332.38	reachFN1
9.65699e-05	2000	reachFN1
0.00012238	2561.25	reachFN1
9.15003e-05	1788.85	reachFN1
0.00148178	1788.85	reachFN1
0.00157595	1649.24	reachFN1
0.00086246	1649.24	reachFN1
2.85717e-05	1649.24	reachFN1
0.000249201	1649.24	reachFN1
0.000644347	1649.24	reachFN1
0.000399437	2433.11	reachFN1
0.000828246	1788.85	reachFN1
0.000574652	1788.85	reachFN1
0.00292061	1788.85	reachFN1
0.00466103	1788.85	reachFN1
1.67704e-05	2000	reachFN1
1.39273e-05	2262.74	reachFN1
0.000350995	2561.25	reachFN1
0.000405036	2884.44	reachFN1
0.000140414	894.427	reachFN1
6.55779e-08	894.427	reachFN1
0.00273065	1649.24	reachFN1
0.000183739	2000	reachFN1
0.00254314	1131.37	reachFN1
0.00194726	400	reachFN1
0.00248281	565.685	reachFN1
0.000350433	1264.91	reachFN1
0.00020801	565.685	reachFN1
0.000993892	1600	reachFN1
0.000201083	800	reachFN1
2.57341e-05	800	reachFN1
0.000146961	2000	reachFN1
0.000932838	2262.74	reachFN1
0.000266859	2561.25	reachFN1
0.0010302	1442.22	reachFN1
0.00254927	1442.22	reachFN1
1.36538e-06	1442.22	reachFN1
0		reachFN1
0.000379342	1788.85	reachFN1
8.67163e-07	1788.85	reachFN1
0.000260009	400	reachFN1
0.000930299	2154.07	reachFN1
0.00292955	800	reachFN1
3.15088e-05	800	reachFN1
0.000319839	800	reachFN1
1.183e-05	2529.82	reachFN1
0.000161538	2529.82	reachFN1
3.08647e-06	1600	reachFN1
0.000225313	3298.48	reachFN1
0.000379243	3298.48	reachFN1
0.000413473	2000	reachFN1
6.98822e-05	565.685	reachFN1
4.52531e-05	2400	reachFN1
1.3266e-05	2400	reachFN1
0.000319022	2800	reachFN1
0.001945	565.685	reachFN1
0.000931164	3200	reachFN1
0.000112476	565.685	reachFN1
3.44758e-05	400	reachFN1
0.000102328	1649.24	reachFN1
0.00035562	1649.24	reachFN1
3.27238e-06	1649.24	reachFN1
0.0017778	565.685	reachFN1
0.000125924	894.427	reachFN1
0.00228598	1264.91	reachFN1
6.90997e-05	1264.91	reachFN1
7.00895e-05	1264.91	reachFN1
0.000956103	1649.24	reachFN1
2.48727e-06	3224.9	reachFN1
4.81108e-05	2039.61	reachFN1
0.000321286	1264.91	reachFN1
5.00423e-05	2332.38	reachFN1
9.6153e-05	2332.38	reachFN1
6.20622e-07	2561.25	reachFN1
0.000468938	1697.06	reachFN1
1.67705e-05	3124.1	reachFN1
8.73009e-05	3124.1	reachFN1
0.000265222	2000	reachFN1
0.000549064	2000	reachFN1
8.02936e-06	2332.38	reachFN1
1.04719e-05	1649.24	reachFN1
0.000153933	3417.6	reachFN1
1.58503e-05	894.427	reachFN1
6.08268e-06	894.427	reachFN1
8.36115e-05	894.427	reachFN1
0.000468782	894.427	reachFN1
0.000600016	2561.25	reachFN1
0.000525291	2561.25	reachFN1
9.35714e-05	1131.37	reachFN1
2.59062e-06	1131.37	reachFN1
0.00178642	1131.37	reachFN1
1.21038e-05	2039.61	reachFN1
0.000269804	2039.61	reachFN1
0.000166356	2039.61	reachFN1
0.00125692	2039.61	reachFN1
3.49962e-08	2433.11	reachFN1
0.000243603	2433.11	reachFN1
0.000478277	2000	reachFN1
7.43972e-08	2000	reachFN1
8.72536e-05	2332.38	reachFN1
0.000930727	2683.28	reachFN1
3.28066e-05	800	reachFN1
3.84586e-07	800	reachFN1
0.000885439	3046.31	reachFN1
0.000352697	1131.37	reachFN1
9.66907e-06	1442.22	reachFN1
2.89475e-05	1442.22	reachFN1
0.000205302	1442.22	reachFN1
6.22825e-05	1649.24	reachFN1
9.64908e-06	1649.24	reachFN1
0.000364562	1788.85	reachFN1
0.000972828	1788.85	reachFN1
1.75821e-05	2154.07	reachFN1
3.32608e-07	2000	reachFN1
0.000137082	2529.82	reachFN1
1.23131e-05	2262.74	reachFN1
4.01105e-05	2912.04	reachFN1
0.000382482	2912.04	reachFN1
2.62458e-05	2561.25	reachFN1
0.000602588	1200	reachFN1
0.000626434	1442.22	reachFN1
0.00309238	0	reachFN1
0.00261376	0	reachFN1
0.000479422	400	reachFN1
6.07867e-05	2154.07	reachFN1
0.000685878	2529.82	reachFN1
0.00247043	1200	reachFN1
0.00157621	2912.04	reachFN1
1.7954e-05	2912.04	reachFN1
0.000324813	3298.48	reachFN1
0.000228521	2000	reachFN1
1.02197e-06	400	reachFN1
0.000297958	400	reachFN1
0.000893918	565.685	reachFN1
0.000813187	565.685	reachFN1
0.00111011	565.685	reachFN1
0.0015549	894.427	reachFN1
2.5205e-05	894.427	reachFN1
9.24552e-05	894.427	reachFN1
0.00046199	1264.91	reachFN1
0.00176565	1264.91	reachFN1
0.000439547	400	reachFN1
0.00331982	400	reachFN1
0.000298339	565.685	reachFN1
2.01433e-05	2039.61	reachFN1
0.000638274	894.427	reachFN1
0.000137082	2433.11	reachFN1
0.000223144	2433.11	reachFN1
0.000395332	2433.11	reachFN1
0.000157985	2433.11	reachFN1
5.1404e-06	1649.24	reachFN1
0.000191195	2039.61	reachFN1
0.000488983	1264.91	reachFN1
0.00019622	2332.38	reachFN1
0.000136924	1264.91	reachFN1
0.000270779	1442.22	reachFN1
0.000150727	2828.43	reachFN1
0.000414041	2828.43	reachFN1
0.00103622	2828.43	reachFN1
0.000424071	1697.06	reachFN1
0.000229852	3124.1	reachFN1
1.94423e-05	2332.38	reachFN1
8.93698e-05	2683.28	reachFN1
0.000112613	3046.31	reachFN1
4.12236e-05	3046.31	reachFN1
8.047e-05	3417.6	reachFN1
0.000772576	800	reachFN1
1.05087e-05	800	reachFN1
0.00102993	2262.74	reachFN1
0.000885687	2262.74	reachFN1
0.00125985	894.427	reachFN1
0.000122103	2561.25	reachFN1
0.00012335	2561.25	reachFN1
0.000110907	2433.11	reachFN1
0.000424816	2828.43	reachFN1
1.11329e-05	2683.28	reachFN1
0.000610184	800	reachFN1
0.000925155	3046.31	reachFN1
8.26748e-05	894.427	reachFN1
0.000442901	894.427	reachFN1
0.000206891	1131.37	reachFN1
2.14864e-05	1131.37	reachFN1
0.000484733	1131.37	reachFN1
4.28779e-06	1131.37	reachFN1
2.76183e-05	1788.85	reachFN1
0.0004678	1788.85	reachFN1
0.000812384	2154.07	reachFN1
0.000312069	2154.07	reachFN1
8.19689e-05	2154.07	reachFN1
0.00100853	2154.07	reachFN1
1.13556e-07	2529.82	reachFN1
4.32303e-05	2912.04	reachFN1
2.68725e-06	1264.91	reachFN1
0.000266294	3224.9	reachFN1
3.65847e-07	1600	reachFN1
0.000352083	1600	reachFN1
0.000535672	565.685	reachFN1
6.32245e-06	3298.48	reachFN1
8.13626e-05	2000	reachFN1
3.26823e-06	1264.91	reachFN1
4.01846e-05	1649.24	reachFN1
7.24464e-05	1200	reachFN1
7.9262e-05	2000	reachFN1
6.5038e-05	894.427	reachFN1
0.000427255	2000	reachFN1
0.000112628	894.427	reachFN1
0.000230948	1697.06	reachFN1
8.40932e-06	894.427	reachFN1
5.02067e-05	3298.48	reachFN1
1.69563e-06	400	reachFN1
1.14955e-05	400	reachFN1
0.000383599	400	reachFN1
9.74897e-05	1788.85	reachFN1
0		reachFN1
0.000808272	0	reachFN1
7.81809e-05	1442.22	reachFN1
0.00205322	400	reachFN1
0.000281901	1131.37	reachFN1
0.00015111	1131.37	reachFN1
0.000354197	1131.37	reachFN1
0.000351514	800	reachFN1
0.00229138	800	reachFN1
0.000202536	800	reachFN1
0.000198056	1600	reachFN1
0.0059223	1600	reachFN1
0.00117788	894.427	reachFN1
0.00105774	2039.61	reachFN1
0.00204707	1131.37	reachFN1
1.96722e-05	1131.37	reachFN1
0.000302548	1442.22	reachFN1
0.000173408	1264.91	reachFN1
0.00149981	1788.85	reachFN1
0.000782472	2332.38	reachFN1
0.00013748	2000	reachFN1
0.000605435	400	reachFN1
1.3481e-05	400	reachFN1
0.000332999	400	reachFN1
6.20598e-05	1697.06	reachFN1
0.00410577	1442.22	reachFN1
0.000159018	1264.91	reachFN1
0.000366905	1264.91	reachFN1
0.00571712	1264.91	reachFN1
0.000599546	1200	reachFN1
0.00675416	1442.22	reachFN1
0.000375697	1697.06	reachFN1
0.000480862	2039.61	reachFN1
0.000580015	1264.91	reachFN1
7.13754e-06	1264.91	reachFN1
0.000741611	1200	reachFN1
0.0016682	565.685	reachFN1
7.81137e-07	1442.22	reachFN1
4.7757e-05	1442.22	reachFN1
0.00103926	400	reachFN1
0.000160969	400	reachFN1
0.000200641	565.685	reachFN1
0.000212133	1442.22	reachFN1
0.000716594	1649.24	reachFN1
4.3482e-05	2000	reachFN1
0.000247158	2000	reachFN1
0.00162747	2000	reachFN1
0.000712918	1200	reachFN1
0.00231824	894.427	reachFN1
4.49238e-07	894.427	reachFN1
3.66229e-07	800	reachFN1
0.00109556	800	reachFN1
7.16587e-05	800	reachFN1
5.78945e-05	1264.91	reachFN1
0.00620808	1264.91	reachFN1
0.00296627	1264.91	reachFN1
0.00169361	1264.91	reachFN1
0.0031909	1442.22	reachFN1
0.00225937	1442.22	reachFN1
0.00201602	2000	reachFN1
6.02423e-05	2000	reachFN1
3.97909e-05	2039.61	reachFN1
0.00193621	2154.07	reachFN1
3.95837e-05	2262.74	reachFN1
0.000140122	2262.74	reachFN1
0.000159788	2332.38	reachFN1
0.000291042	1788.85	reachFN1
0.00086081	1649.24	reachFN1
1.63863e-06	1649.24	reachFN1
0.0027788	1649.24	reachFN1
7.96969e-05	2683.28	reachFN1
0.000165268	2683.28	reachFN1
0.000277301	1600	reachFN1
3.6659e-06	2529.82	reachFN1
0.00182325	1649.24	reachFN1
0.0014738	2433.11	reachFN1
1.21174e-06	1788.85	reachFN1
0.000334627	2400	reachFN1
0.000203176	2000	reachFN1
0.000838628	2000	reachFN1
0.0009323	2433.11	reachFN1
0.00552945	2561.25	reachFN1
0.00277126	400	reachFN1
1.35987e-05	1788.85	reachFN1
0.000181076	1788.85	reachFN1
1.53141e-05	1442.22	reachFN1
0.00311439	400	reachFN1
2.4265e-05	800	reachFN1
0.00130247	894.427	reachFN1
0.00650607	1200	reachFN1
7.52649e-05	1200	reachFN1
0.000298691	1600	reachFN1
0.000283874	894.427	reachFN1
0.00178043	1649.24	reachFN1
0.00899227	1649.24	reachFN1
0.00015215	1264.91	reachFN1
2.97952e-05	1264.91	reachFN1
0.000174828	1264.91	reachFN1
0.00140022	894.427	reachFN1
0.000180645	894.427	reachFN1
0.00196281	894.427	reachFN1
4.31128e-05	565.685	reachFN1
0.00716742	565.685	reachFN1
0.000170302	2000	reachFN1
8.79327e-05	2000	reachFN1
5.22763e-05	1697.06	reachFN1
0.000525088	565.685	reachFN1
0.000833224	1442.22	reachFN1
8.74933e-08	894.427	reachFN1
0.00155402	894.427	reachFN1
0.00140751	894.427	reachFN1
0.00764942	894.427	reachFN1
0.00269163	1200	reachFN1
0.000376107	1697.06	reachFN1
0.00371012	2039.61	reachFN1
1.40956e-05	1264.91	reachFN1
0.000617821	1264.91	reachFN1
0.000545872	894.427	reachFN1
0.00026044	1264.91	reachFN1
0.000534994	1264.91	reachFN1
0.00120632	1264.91	reachFN1
0.00580453	565.685	reachFN1
0.00277028	1442.22	reachFN1
4.64954e-05	565.685	reachFN1
0.000800991	894.427	reachFN1
0.000625624	1264.91	reachFN1
0.000286103	1264.91	reachFN1
0.00105862	1649.24	reachFN1
0.00257985	1600	reachFN1
2.62825e-05	1600	reachFN1
0.00130532	800	reachFN1
0.00153187	800	reachFN1
3.61597e-05	1200	reachFN1
0.000470578	894.427	reachFN1
0.000115291	894.427	reachFN1
0.000397646	1442.22	reachFN1
0.00394441	1697.06	reachFN1
0.00215663	2154.07	reachFN1
0.00137269	2262.74	reachFN1
1.71566e-05	2332.38	reachFN1
0.000369125	2000	reachFN1
0.00207418	2000	reachFN1
0.00264727	1788.85	reachFN1
0.000278549	1788.85	reachFN1
0.00114941	1788.85	reachFN1
0.000498796	1788.85	reachFN1
0.00425504	1600	reachFN1
3.43516e-05	2529.82	reachFN1
0.000101284	1649.24	reachFN1
0.00018125	1649.24	reachFN1
0.00334445	1649.24	reachFN1
0.00224831	1649.24	reachFN1
7.84542e-06	1788.85	reachFN1
0.000106201	2000	reachFN1
0.000375863	2828.43	reachFN1
3.50375e-05	2683.28	reachFN1
0.00102826	800	reachFN1
0.000905942	800	reachFN1
0.00496892	2039.61	reachFN1
0.00466994	1600	reachFN1
0.000557648	894.427	reachFN1
0.000149326	565.685	reachFN1
0.000273537	400	reachFN1
0.000944173	1649.24	reachFN1
0.000386482	400	reachFN1
7.26577e-05	2000	reachFN1
0.00035686	894.427	reachFN1
0.000258135	1200	reachFN1
8.29345e-07	2039.61	reachFN1
5.27919e-05	2561.25	reachFN1
0.0062108	2262.74	reachFN1
0.00899331	400	reachFN1
0.00110366	400	reachFN1
0.00131256	400	reachFN1
5.29775e-06	1788.85	reachFN1
0.000834257	0	reachFN1
0		reachFN1
0.000535504	1442.22	reachFN1
0.00141981	400	reachFN1
8.50698e-05	1131.37	reachFN1
0.0014028	1131.37	reachFN1
0.000272306	1131.37	reachFN1
0.000125424	800	reachFN1
5.48882e-06	800	reachFN1
0.000184863	800	reachFN1
0.000758279	1600	reachFN1
0.00150867	1600	reachFN1
0.00157128	894.427	reachFN1
0.00057787	2039.61	reachFN1
1.78234e-05	1131.37	reachFN1
0.0003384	1131.37	reachFN1
0.00351925	1442.22	reachFN1
0.000857022	1264.91	reachFN1
0.00105071	1788.85	reachFN1
0.000849198	2332.38	reachFN1
0.00221312	2000	reachFN1
0.00114835	400	reachFN1
9.01701e-05	400	reachFN1
0.000932334	400	reachFN1
0.000703476	1697.06	reachFN1
0.000452897	1442.22	reachFN1
0.000185341	1264.91	reachFN1
0.0042295	1264.91	reachFN1
0.000207761	1264.91	reachFN1
0.000960801	1200	reachFN1
0.000503482	1442.22	reachFN1
0.000228582	1697.06	reachFN1
2.64336e-06	2039.61	reachFN1
2.88861e-05	1264.91	reachFN1
0.00114196	1264.91	reachFN1
2.04648e-05	1200	reachFN1
0.00022683	565.685	reachFN1
0.000600983	1442.22	reachFN1
7.7151e-05	1442.22	reachFN1
0.000884256	400	reachFN1
6.48995e-05	400	reachFN1
0.00139167	565.685	reachFN1
0.000223758	1442.22	reachFN1
7.78812e-06	1649.24	reachFN1
0.000255407	2000	reachFN1
2.59392e-06	2000	reachFN1
0.000113112	2000	reachFN1
2.6219e-07	1200	reachFN1
2.20361e-05	894.427	reachFN1
0.00128959	894.427	reachFN1
0.00408525	800	reachFN1
0.00285784	800	reachFN1
0.00794575	800	reachFN1
0.000362829	1264.91	reachFN1
0.00156141	1264.91	reachFN1
1.75785e-05	1264.91	reachFN1
0.000155531	1264.91	reachFN1
3.42004e-06	1442.22	reachFN1
3.28962e-05	1442.22	reachFN1
0.00378175	2000	reachFN1
0.000171348	2000	reachFN1
0.00139919	2039.61	reachFN1
4.07609e-07	2154.07	reachFN1
0.00238138	2262.74	reachFN1
0.00034267	2262.74	reachFN1
0.000368209	2332.38	reachFN1
0.00394659	1788.85	reachFN1
0.0030377	1649.24	reachFN1
0.00453373	1649.24	reachFN1
0.014553	1649.24	reachFN1
0.00130795	2683.28	reachFN1
8.73553e-07	2683.28	reachFN1
0.00303091	1600	reachFN1
0.00763732	2529.82	reachFN1
2.12204e-05	1649.24	reachFN1
0.00012073	2433.11	reachFN1
5.89102e-05	1788.85	reachFN1
2.26949e-06	2400	reachFN1
0.00171248	2000	reachFN1
0.00072427	2000	reachFN1
9.76498e-05	2433.11	reachFN1
6.74332e-05	2561.25	reachFN1
0.00851345	400	reachFN1
6.97271e-06	1788.85	reachFN1
3.98537e-05	1788.85	reachFN1
0.0013448	1442.22	reachFN1
0.0023471	400	reachFN1
0.00219414	800	reachFN1
0.000431769	894.427	reachFN1
3.82041e-05	1200	reachFN1
0.00402323	1200	reachFN1
0.000448276	1600	reachFN1
0.00172914	894.427	reachFN1
0.00109635	1649.24	reachFN1
0.00141596	1649.24	reachFN1
7.92357e-05	1264.91	reachFN1
0.000774186	1264.91	reachFN1
0.000259096	1264.91	reachFN1
0.00013798	894.427	reachFN1
0.00496337	894.427	reachFN1
0.00116599	894.427	reachFN1
0.00139926	565.685	reachFN1
0.000365858	565.685	reachFN1
0.000346029	2000	reachFN1
1.92274e-05	2000	reachFN1
0.00181162	1697.06	reachFN1
0.000262581	565.685	reachFN1
0.000280384	1442.22	reachFN1
7.1097e-05	894.427	reachFN1
2.679e-05	894.427	reachFN1
0.000414654	894.427	reachFN1
0.000715264	894.427	reachFN1
0.000986231	1200	reachFN1
0.00015262	1697.06	reachFN1
0.000167676	2039.61	reachFN1
0.00037478	1264.91	reachFN1
0.00055686	1264.91	reachFN1
0.000720242	894.427	reachFN1
0.00185888	1264.91	reachFN1
0.00132211	1264.91	reachFN1
1.3498e-05	1264.91	reachFN1
1.29378e-05	565.685	reachFN1
2.84704e-05	1442.22	reachFN1
0.000181805	565.685	reachFN1
0.00136853	894.427	reachFN1
0.00180169	1264.91	reachFN1
0.00523088	1264.91	reachFN1
0.000290633	1649.24	reachFN1
0.002985	1600	reachFN1
0.00127376	1600	reachFN1
0.000605838	800	reachFN1
0.00388437	800	reachFN1
0.000127711	1200	reachFN1
0.000414589	894.427	reachFN1
0.000164615	894.427	reachFN1
0.000337999	1442.22	reachFN1
0.00207045	1697.06	reachFN1
8.98381e-05	2154.07	reachFN1
0.00300855	2262.74	reachFN1
0.00076306	2332.38	reachFN1
0.00317759	2000	reachFN1
3.5699e-07	2000	reachFN1
0.00374922	1788.85	reachFN1
0.000530501	1788.85	reachFN1
0.00134754	1788.85	reachFN1
0.000342778	1788.85	reachFN1
0.000151491	1600	reachFN1
0.000135097	2529.82	reachFN1
0.00018461	1649.24	reachFN1
0.00665179	1649.24	reachFN1
0.000388499	1649.24	reachFN1
0.0200801	1649.24	reachFN1
0.000224208	1788.85	reachFN1
5.02371e-07	2000	reachFN1
8.95504e-05	2828.43	reachFN1
0.00110964	2683.28	reachFN1
1.90877e-05	800	reachFN1
8.5719e-05	800	reachFN1
0.00107062	2039.61	reachFN1
0.00306228	1600	reachFN1
0.00146139	894.427	reachFN1
0.00642503	565.685	reachFN1
0.00157513	400	reachFN1
0.000521226	1649.24	reachFN1
0.00038843	400	reachFN1
0.000133243	2000	reachFN1
0.00061516	894.427	reachFN1
0.00204812	1200	reachFN1
0.00503035	2039.61	reachFN1
0.00131697	2561.25	reachFN1
0.000809708	2262.74	reachFN1
0.00051623	1131.37	reachFN1
0.000118364	1131.37	reachFN1
7.55653e-05	1131.37	reachFN1
0.000378949	400	reachFN1
0.000119009	1442.22	reachFN1
0.000283686	1442.22	reachFN1
0		reachFN1
0.00672751	1788.85	reachFN1
0.000857077	400	reachFN1
0.00624367	400	reachFN1
0.0043368	400	reachFN1
3.57151e-05	2154.07	reachFN1
0.00223536	2154.07	reachFN1
0.0109344	1200	reachFN1
6.15896e-06	2912.04	reachFN1
0.00976222	2912.04	reachFN1
9.92373e-05	1600	reachFN1
0.00201004	894.427	reachFN1
0.00205454	2000	reachFN1
0.000935443	2000	reachFN1
0.0298906	2400	reachFN1
0.00507861	400	reachFN1
0.00132274	2800	reachFN1
4.70011e-06	894.427	reachFN1
0.000295909	565.685	reachFN1
0.00320445	1264.91	reachFN1
0.000445398	1264.91	reachFN1
0.00115489	1264.91	reachFN1
1.75794e-05	400	reachFN1
0.00752169	565.685	reachFN1
5.8773e-06	894.427	reachFN1
0.0163818	894.427	reachFN1
0.000253637	894.427	reachFN1
0.00300297	1264.91	reachFN1
0.000806584	2884.44	reachFN1
0.000226244	2000	reachFN1
0.000349439	1442.22	reachFN1
0.000412787	2154.07	reachFN1
0.000648198	2154.07	reachFN1
2.43328e-06	2332.38	reachFN1
0.00104581	1442.22	reachFN1
9.00031e-05	2828.43	reachFN1
0.000863269	2828.43	reachFN1
1.59897e-05	1697.06	reachFN1
0.0165933	1697.06	reachFN1
0.00547583	2000	reachFN1
0.000442632	1600	reachFN1
0.0123714	3046.31	reachFN1
0.00526507	1131.37	reachFN1
0.000895367	1131.37	reachFN1
0.00065494	1131.37	reachFN1
4.50679e-06	800	reachFN1
0.00271468	2262.74	reachFN1
0.00581126	2262.74	reachFN1
0.0116517	894.427	reachFN1
0.000116331	894.427	reachFN1
0.00220264	894.427	reachFN1
0.000631131	1649.24	reachFN1
0.00474022	1649.24	reachFN1
0.000458383	1649.24	reachFN1
0.00385665	1649.24	reachFN1
0.00116276	2039.61	reachFN1
0.000583282	2039.61	reachFN1
0.0140456	1697.06	reachFN1
0.00316678	1697.06	reachFN1
0.0192394	2000	reachFN1
9.01535e-05	2332.38	reachFN1
0.00124971	894.427	reachFN1
3.21669e-05	894.427	reachFN1
0.0307496	2683.28	reachFN1
0.00116124	894.427	reachFN1
0.0083875	1131.37	reachFN1
0.0119965	1131.37	reachFN1
0.00287233	1131.37	reachFN1
0.00138316	1600	reachFN1
0.00225564	1600	reachFN1
0.00201343	1442.22	reachFN1
0.00921316	1649.24	reachFN1
0.00129955	1788.85	reachFN1
0.00236519	1788.85	reachFN1
0.00492609	2154.07	reachFN1
0.00546571	2000	reachFN1
0.00285536	2529.82	reachFN1
0.00964828	2529.82	reachFN1
0.00350908	2262.74	reachFN1
0.00218362	1264.91	reachFN1
0.00237239	1131.37	reachFN1
8.38337e-06	400	reachFN1
1.22526e-05	400	reachFN1
0.010872	0	reachFN1
0.00509371	1788.85	reachFN1
0.00261965	2154.07	reachFN1
0.000741508	800	reachFN1
0.0152915	2529.82	reachFN1
0.000376067	2529.82	reachFN1
0.00090371	2912.04	reachFN1
2.37439e-05	1600	reachFN1
0.001662	565.685	reachFN1
0.00133455	565.685	reachFN1
0.000980384	400	reachFN1
0.00243782	400	reachFN1
0.0133707	400	reachFN1
5.89069e-07	565.685	reachFN1
0.00155696	565.685	reachFN1
0.00132621	565.685	reachFN1
0.00457035	894.427	reachFN1
0.000156398	894.427	reachFN1
0.00396104	565.685	reachFN1
0.00353985	565.685	reachFN1
0.0051459	400	reachFN1
0.00172416	1649.24	reachFN1
0.00428658	565.685	reachFN1
0.000383631	2039.61	reachFN1
0.00222929	2039.61	reachFN1
0.00152333	2039.61	reachFN1
0.000525799	2039.61	reachFN1
0.00102415	1264.91	reachFN1
0.000159432	2000	reachFN1
0.00105874	1442.22	reachFN1
0.00176051	2154.07	reachFN1
0.000532201	1200	reachFN1
0.00392377	1264.91	reachFN1
0.00210568	2561.25	reachFN1
0.00467988	2561.25	reachFN1
0.00282519	2561.25	reachFN1
0.000528632	1442.22	reachFN1
0.000490957	2828.43	reachFN1
1.21291e-05	2000	reachFN1
0.00526276	2332.38	reachFN1
0.000315716	2683.28	reachFN1
0.000444923	2683.28	reachFN1
0.00398608	3046.31	reachFN1
0.00265432	894.427	reachFN1
0.000441178	894.427	reachFN1
0.0001011	2000	reachFN1
0.00298536	2000	reachFN1
0.000428039	800	reachFN1
0.0002218	2262.74	reachFN1
0.000393104	2262.74	reachFN1
4.09726e-05	2039.61	reachFN1
0.0101751	2433.11	reachFN1
0.000199831	2332.38	reachFN1
0.00386866	894.427	reachFN1
0.00170053	2683.28	reachFN1
0.000281301	800	reachFN1
0.00202989	800	reachFN1
0.00681364	894.427	reachFN1
0.00530332	894.427	reachFN1
0.00837173	894.427	reachFN1
0.0052997	894.427	reachFN1
0.00378657	1442.22	reachFN1
0.00225904	1649.24	reachFN1
0.00104036	1788.85	reachFN1
0.0156269	1788.85	reachFN1
0.000276964	1788.85	reachFN1
0.00599057	1788.85	reachFN1
0.00227203	2154.07	reachFN1
0.00116134	2529.82	reachFN1
0.000225356	1442.22	reachFN1
0.00786944	2884.44	reachFN1
0.000278044	1200	reachFN1
0.000596794	1200	reachFN1
0.000596406	894.427	reachFN1
0.0091704	2912.04	reachFN1
0.000832699	1600	reachFN1
0.00025878	894.427	reachFN1
0.00342514	1264.91	reachFN1
2.19799e-05	1264.91	reachFN1
1.08469e-05	1697.06	reachFN1
0.00308859	1131.37	reachFN1
3.75106e-05	1788.85	reachFN1
0.00177879	800	reachFN1
0.00745004	1442.22	reachFN1
0.000635155	1131.37	reachFN1
4.89402e-05	2912.04	reachFN1
0.000897757	800	reachFN1
8.96814e-05	800	reachFN1
0.00043551	800	reachFN1
0.00134269	2154.07	reachFN1
0.000715783	400	reachFN1
0.00255404	400	reachFN1
0.00554856	1788.85	reachFN1
0		reachFN1
0.0013261	1442.22	reachFN1
0.00242321	1442.22	reachFN1
0.00127886	1442.22	reachFN1
6.05011e-06	400	reachFN1
0.00112401	400	reachFN1
0.00298477	894.427	reachFN1
2.64646e-05	1200	reachFN1
0.00745739	1200	reachFN1
0.000827427	800	reachFN1
0.00012853	2433.11	reachFN1
7.61213e-06	894.427	reachFN1
1.71131e-05	894.427	reachFN1
0.00654539	1131.37	reachFN1
0.00212764	1649.24	reachFN1
1.0565e-05	1442.22	reachFN1
0.000504167	2683.28	reachFN1
8.32702e-05	2332.38	reachFN1
0.000972858	565.685	reachFN1
3.46434e-05	565.685	reachFN1
0.00590296	565.685	reachFN1
0.00135836	2000	reachFN1
9.761e-05	1697.06	reachFN1
0.00205269	1442.22	reachFN1
0.00445451	1442.22	reachFN1
0.00447014	1442.22	reachFN1
0.00276255	1264.91	reachFN1
0.00454262	1131.37	reachFN1
8.56699e-06	2000	reachFN1
0.000452862	2433.11	reachFN1
3.25453e-05	1442.22	reachFN1
0.0011652	1442.22	reachFN1
0.000148684	1264.91	reachFN1
4.50995e-08	894.427	reachFN1
0.000139012	1264.91	reachFN1
5.60506e-06	1264.91	reachFN1
4.98176e-06	565.685	reachFN1
0.00714149	565.685	reachFN1
0.00135717	400	reachFN1
1.66421e-06	1788.85	reachFN1
0.00385088	1264.91	reachFN1
0.00227854	2400	reachFN1
0.000170193	2400	reachFN1
0.000564593	2400	reachFN1
0.000116036	1600	reachFN1
0.00297703	800	reachFN1
0.000242591	800	reachFN1
0.00415249	1200	reachFN1
0.000679303	1200	reachFN1
0.00183587	1200	reachFN1
0.000463086	1200	reachFN1
1.09507e-05	1200	reachFN1
0.0012396	1200	reachFN1
0.000876678	1200	reachFN1
0.00130866	1264.91	reachFN1
5.2096e-05	1264.91	reachFN1
0.0109447	2039.61	reachFN1
0.000401179	2039.61	reachFN1
0.00598745	2000	reachFN1
0.000510894	2039.61	reachFN1
0.000200288	2561.25	reachFN1
1.84157e-07	2561.25	reachFN1
0.00548109	2154.07	reachFN1
0.000821494	2000	reachFN1
4.40406e-05	1788.85	reachFN1
0.0021058	1788.85	reachFN1
0.00646705	1788.85	reachFN1
0.000202348	2884.44	reachFN1
0.00145455	2884.44	reachFN1
0.00096801	1649.24	reachFN1
0.0056571	2683.28	reachFN1
0.00159512	1600	reachFN1
0.000331637	2529.82	reachFN1
0.00143313	1649.24	reachFN1
6.18408e-07	2433.11	reachFN1
0.00334445	1788.85	reachFN1
0.000305034	1788.85	reachFN1
0.000238745	2400	reachFN1
0.00403398	2828.43	reachFN1
0.000263558	800	reachFN1
0.000106881	2154.07	reachFN1
2.70081e-05	2154.07	reachFN1
0.00221414	1788.85	reachFN1
0.000192521	0	reachFN1
0.000559644	400	reachFN1
3.995e-05	1131.37	reachFN1
0.0196864	800	reachFN1
0.000537824	800	reachFN1
0.0026235	1200	reachFN1
0.000306157	800	reachFN1
6.02395e-05	2039.61	reachFN1
0.00123712	2039.61	reachFN1
4.26549e-08	1649.24	reachFN1
5.66446e-05	1649.24	reachFN1
0.00192923	1649.24	reachFN1
0.00220085	1264.91	reachFN1
0.000272401	1264.91	reachFN1
5.42658e-05	1264.91	reachFN1
0.00182432	894.427	reachFN1
0.00251276	894.427	reachFN1
0.000113646	2332.38	reachFN1
0.000664626	2332.38	reachFN1
0.000838473	2000	reachFN1
0.000414978	400	reachFN1
0.00019884	1697.06	reachFN1
1.42757e-05	565.685	reachFN1
0.000367758	565.685	reachFN1
0.00347713	565.685	reachFN1
0.00432693	565.685	reachFN1
0.00225645	1264.91	reachFN1
0.000178602	2000	reachFN1
0.00142959	2433.11	reachFN1
0.000578478	1442.22	reachFN1
0.00011077	1649.24	reachFN1
0.00145582	1264.91	reachFN1
0.00165249	1200	reachFN1
0.000146203	1200	reachFN1
2.1418e-05	1200	reachFN1
0.00140061	894.427	reachFN1
0.00503122	1264.91	reachFN1
0.000726871	400	reachFN1
0.00287062	565.685	reachFN1
0.000102867	894.427	reachFN1
0.000153984	894.427	reachFN1
0.00041437	1264.91	reachFN1
2.72276e-05	2000	reachFN1
0.000406312	2000	reachFN1
0.000653227	894.427	reachFN1
0.000257148	894.427	reachFN1
1.44647e-05	1600	reachFN1
2.69841e-07	800	reachFN1
4.65158e-05	800	reachFN1
0.00208652	1264.91	reachFN1
0.00097353	1442.22	reachFN1
6.53258e-06	2039.61	reachFN1
4.91438e-05	2561.25	reachFN1
0.00110998	2154.07	reachFN1
0.000254758	2262.74	reachFN1
1.02126e-05	2262.74	reachFN1
1.82614e-05	2000	reachFN1
0.000103403	2000	reachFN1
0.00186224	2000	reachFN1
0.000469916	2000	reachFN1
0.000125127	1649.24	reachFN1
0.000433923	2683.28	reachFN1
0.000286425	1600	reachFN1
0.00393588	1600	reachFN1
0.000584784	1600	reachFN1
0.00446178	1600	reachFN1
0.000676962	1649.24	reachFN1
0.000980462	1788.85	reachFN1
0.000219993	3124.1	reachFN1
0.00357954	2529.82	reachFN1
0.000418333	894.427	reachFN1
0.000109631	894.427	reachFN1
0.000429661	2433.11	reachFN1
0.0159522	1200	reachFN1
6.06701e-05	800	reachFN1
0.000152894	894.427	reachFN1
0.00146838	565.685	reachFN1
7.51703e-05	2039.61	reachFN1
0.000711883	565.685	reachFN1
0.000590564	2400	reachFN1
6.32412e-05	1131.37	reachFN1
6.20421e-05	1600	reachFN1
0.00182982	2154.07	reachFN1
0.00082582	2884.44	reachFN1
0.000722779	2000	reachFN1
0.00103983	894.427	reachFN1
0.000827436	894.427	reachFN1
0.000729532	894.427	reachFN1
0.00180102	800	reachFN1
0.000461711	1131.37	reachFN1
7.70647e-05	1131.37	reachFN1
0.000568342	400	reachFN1
0.00101907	1442.22	reachFN1
0		reachFN1
0.00527682	0	reachFN1
0.00367412	0	reachFN1
7.31439e-07	1788.85	reachFN1
0.00297018	1788.85	reachFN1
0.000204571	800	reachFN1
2.31298e-05	2529.82	reachFN1
0.000314228	2529.82	reachFN1
0.000170389	1200	reachFN1
0.00126501	1264.91	reachFN1
0.000644336	1600	reachFN1
3.34791e-07	1600	reachFN1
5.67888e-05	2000	reachFN1
6.59311e-05	565.685	reachFN1
0.000314011	2400	reachFN1
0.000845117	1264.91	reachFN1
0.000717874	894.427	reachFN1
0.00124062	894.427	reachFN1
0.000810112	894.427	reachFN1
3.67319e-05	894.427	reachFN1
0.000240024	565.685	reachFN1
0.000674521	400	reachFN1
0.000805531	565.685	reachFN1
2.59805e-05	565.685	reachFN1
0.0014649	565.685	reachFN1
0.000171406	894.427	reachFN1
0.000120869	2561.25	reachFN1
0.000212357	2039.61	reachFN1
4.63677e-05	1697.06	reachFN1
4.74275e-06	2039.61	reachFN1
8.12909e-05	2039.61	reachFN1
0.000216618	2154.07	reachFN1
0.00165635	1264.91	reachFN1
1.22779e-06	2561.25	reachFN1
3.38547e-07	2561.25	reachFN1
0.000800855	1442.22	reachFN1
2.60364e-06	1442.22	reachFN1
0.000255445	1697.06	reachFN1
0.000217058	1649.24	reachFN1
0.00140824	2683.28	reachFN1
0.000218268	1442.22	reachFN1
0.000170235	1442.22	reachFN1
0.0011487	1442.22	reachFN1
7.58683e-05	894.427	reachFN1
0.00335858	2000	reachFN1
0.000154634	2000	reachFN1
1.57394e-08	800	reachFN1
0.00115342	800	reachFN1
0.00114455	800	reachFN1
5.51338e-05	1264.91	reachFN1
0.0004753	1264.91	reachFN1
0.000107517	1264.91	reachFN1
0.00549888	1264.91	reachFN1
0.000547294	1649.24	reachFN1
0.00104199	1649.24	reachFN1
1.14832e-05	1442.22	reachFN1
0.00147536	1442.22	reachFN1
2.21425e-05	1697.06	reachFN1
8.52877e-06	2000	reachFN1
1.73735e-10	1131.37	reachFN1
9.98819e-05	1131.37	reachFN1
0.000101202	2332.38	reachFN1
0.00144065	800	reachFN1
0.000285496	894.427	reachFN1
9.65745e-05	894.427	reachFN1
0.000941758	894.427	reachFN1
0.000327977	1649.24	reachFN1
0.00010566	1649.24	reachFN1
0.000645758	1131.37	reachFN1
0.000317724	1600	reachFN1
0.00126196	1442.22	reachFN1
7.56593e-05	1649.24	reachFN1
0.000383486	1788.85	reachFN1
4.089e-05	1788.85	reachFN1
0.000982349	2154.07	reachFN1
0.00120788	2154.07	reachFN1
0.000294351	2000	reachFN1
8.27629e-05	1442.22	reachFN1
0.000715411	894.427	reachFN1
3.99757e-07	800	reachFN1
0.000693354	800	reachFN1
0.00537573	400	reachFN1
0.000322502	1442.22	reachFN1
0.00155886	1788.85	reachFN1
0.000200951	400	reachFN1
0.0024622	2154.07	reachFN1
0.00121279	2154.07	reachFN1
0.000102723	2529.82	reachFN1
4.80545e-05	1200	reachFN1
2.1585e-05	894.427	reachFN1
0.00197017	894.427	reachFN1
0.00106061	565.685	reachFN1
0.000152758	565.685	reachFN1
0.00237805	565.685	reachFN1
0.000227703	400	reachFN1
2.0391e-05	400	reachFN1
0.00122684	400	reachFN1
0.000319872	565.685	reachFN1
0.000168308	565.685	reachFN1
0.00118611	894.427	reachFN1
0.000691318	894.427	reachFN1
0.00124546	565.685	reachFN1
0.000272158	1264.91	reachFN1
0.000394419	400	reachFN1
0.000218886	1649.24	reachFN1
0.000205629	1649.24	reachFN1
2.13113e-06	1649.24	reachFN1
0.00154226	1649.24	reachFN1
0.00131443	894.427	reachFN1
0.00089881	2039.61	reachFN1
0.00188121	1697.06	reachFN1
8.22137e-07	2039.61	reachFN1
7.59592e-05	1264.91	reachFN1
5.00135e-05	1200	reachFN1
1.71214e-05	2332.38	reachFN1
0.00054736	2332.38	reachFN1
0.000639756	2332.38	reachFN1
0.00285779	1264.91	reachFN1
6.98624e-05	2561.25	reachFN1
0.000191997	1697.06	reachFN1
0.00106223	2000	reachFN1
6.66536e-05	2332.38	reachFN1
0.000691325	2332.38	reachFN1
0.000254817	2683.28	reachFN1
0.000461026	1131.37	reachFN1
0.00064736	1131.37	reachFN1
9.51537e-08	1788.85	reachFN1
0.000485601	1788.85	reachFN1
0.000921489	894.427	reachFN1
0.000162103	2000	reachFN1
3.17485e-05	2000	reachFN1
0.000156865	1649.24	reachFN1
2.01347e-05	2039.61	reachFN1
8.74617e-05	2000	reachFN1
0.000465442	1131.37	reachFN1
0.00161539	2332.38	reachFN1
8.88575e-07	894.427	reachFN1
9.51771e-05	894.427	reachFN1
0.00139469	800	reachFN1
0.000817151	800	reachFN1
3.75906e-05	800	reachFN1
0.000513441	800	reachFN1
0.00112624	1131.37	reachFN1
4.66094e-06	1600	reachFN1
0.000172159	1442.22	reachFN1
4.04926e-05	1442.22	reachFN1
0.0007182	1442.22	reachFN1
0.00294536	1442.22	reachFN1
4.19223e-05	1788.85	reachFN1
5.17175e-05	2154.07	reachFN1
8.77534e-05	1697.06	reachFN1
3.82279e-05	2561.25	reachFN1
0.000521332	800	reachFN1
6.22748e-05	800	reachFN1
0.0020016	1264.91	reachFN1
0.000229418	2529.82	reachFN1
0.00140643	1200	reachFN1
0.00180501	565.685	reachFN1
4.82644e-05	894.427	reachFN1
4.11013e-05	1442.22	reachFN1
0.000158525	1442.22	reachFN1
0.000269269	1442.22	reachFN1
0.000103052	1649.24	reachFN1
0.000167127	894.427	reachFN1
3.98656e-05	1264.91	reachFN1
0.00011119	1442.22	reachFN1
0.000105378	2529.82	reachFN1
0.00298064	894.427	reachFN1
0.00779492	894.427	reachFN1
0.00116521	894.427	reachFN1
4.18315e-06	800	reachFN1
0.000486483	1131.37	reachFN1
0.00197765	1131.37	reachFN1
0.00627827	400	reachFN1
0.00347762	1442.22	reachFN1
0.00248878	0	reachFN1
0		reachFN1
0.00327016	0	reachFN1
0.000661281	1788.85	reachFN1
0.000161292	1788.85	reachFN1
0.00770485	800	reachFN1
8.02689e-05	2529.82	reachFN1
0.00369181	2529.82	reachFN1
0.00272113	1200	reachFN1
0.000159697	1264.91	reachFN1
2.78454e-05	1600	reachFN1
1.42346e-06	1600	reachFN1
0.0212299	2000	reachFN1
0.0083735	565.685	reachFN1
0.00146524	2400	reachFN1
6.42957e-06	1264.91	reachFN1
0.0154617	894.427	reachFN1
0.0119543	894.427	reachFN1
0.00219489	894.427	reachFN1
0.000325469	894.427	reachFN1
0.00270007	565.685	reachFN1
0.000618692	400	reachFN1
2.19043e-05	565.685	reachFN1
0.0378428	565.685	reachFN1
0.0108994	565.685	reachFN1
2.16479e-07	894.427	reachFN1
0.00053515	2561.25	reachFN1
1.04099e-06	2039.61	reachFN1
0.00119089	1697.06	reachFN1
0.000142133	2039.61	reachFN1
0.000617116	2039.61	reachFN1
2.54488e-05	2154.07	reachFN1
0.0011344	1264.91	reachFN1
0.000211183	2561.25	reachFN1
0.000590176	2561.25	reachFN1
8.10433e-05	1442.22	reachFN1
0.0104027	1442.22	reachFN1
0.00466666	1697.06	reachFN1
0.000311706	1649.24	reachFN1
0.00831081	2683.28	reachFN1
0.00182047	1442.22	reachFN1
0.00235182	1442.22	reachFN1
4.74178e-07	1442.22	reachFN1
0.000476204	894.427	reachFN1
0.00199127	2000	reachFN1
0.00423193	2000	reachFN1
0.0112752	800	reachFN1
0.00388887	800	reachFN1
0.0082254	800	reachFN1
0.000106363	1264.91	reachFN1
0.00211419	1264.91	reachFN1
7.35235e-05	1264.91	reachFN1
0.00120379	1264.91	reachFN1
0.000302947	1649.24	reachFN1
0.00101678	1649.24	reachFN1
0.0143079	1442.22	reachFN1
0.0174898	1442.22	reachFN1
0.00371036	1697.06	reachFN1
0.000945156	2000	reachFN1
0.0176225	1131.37	reachFN1
0.00298994	1131.37	reachFN1
0.00915049	2332.38	reachFN1
0.000709082	800	reachFN1
0.00353387	894.427	reachFN1
0.00435486	894.427	reachFN1
0.00574563	894.427	reachFN1
0.00455035	1649.24	reachFN1
0.00297542	1649.24	reachFN1
0.00179383	1131.37	reachFN1
0.0261194	1600	reachFN1
0.00319071	1442.22	reachFN1
2.90372e-07	1649.24	reachFN1
0.00157809	1788.85	reachFN1
0.00017743	1788.85	reachFN1
0.00407786	2154.07	reachFN1
0.0018763	2154.07	reachFN1
0.000273658	2000	reachFN1
0.005374	1442.22	reachFN1
0.0066183	894.427	reachFN1
0.000228649	800	reachFN1
0.000842659	800	reachFN1
0.0118132	400	reachFN1
0.0033265	1442.22	reachFN1
7.03211e-05	1788.85	reachFN1
1.96949e-07	400	reachFN1
0.0200552	2154.07	reachFN1
0.000431898	2154.07	reachFN1
3.05756e-06	2529.82	reachFN1
6.62764e-05	1200	reachFN1
0.000621156	894.427	reachFN1
0.000842081	894.427	reachFN1
4.06322e-05	565.685	reachFN1
3.57807e-05	565.685	reachFN1
0.00806496	565.685	reachFN1
0.00156771	400	reachFN1
0.002637	400	reachFN1
0.000373484	400	reachFN1
0.000577355	565.685	reachFN1
0.000588033	565.685	reachFN1
0.00283442	894.427	reachFN1
0.00205909	894.427	reachFN1
0.0050638	565.685	reachFN1
0.00117499	1264.91	reachFN1
0.000125663	400	reachFN1
1.49259e-05	1649.24	reachFN1
0.000725576	1649.24	reachFN1
0.000105048	1649.24	reachFN1
0.00410092	1649.24	reachFN1
0.00129992	894.427	reachFN1
5.2859e-06	2039.61	reachFN1
0.000256272	1697.06	reachFN1
0.000176067	2039.61	reachFN1
0.00216112	1264.91	reachFN1
0.00931399	1200	reachFN1
0.00291423	2332.38	reachFN1
0.00222302	2332.38	reachFN1
0.00154803	2332.38	reachFN1
0.00130801	1264.91	reachFN1
0.00225468	2561.25	reachFN1
1.13979e-08	1697.06	reachFN1
0.000889379	2000	reachFN1
0.00091523	2332.38	reachFN1
0.00226501	2332.38	reachFN1
0.000281221	2683.28	reachFN1
0.00162097	1131.37	reachFN1
0.0113633	1131.37	reachFN1
0.000633216	1788.85	reachFN1
0.00267728	1788.85	reachFN1
0.00125356	894.427	reachFN1
2.99085e-05	2000	reachFN1
0.000654063	2000	reachFN1
0.00147099	1649.24	reachFN1
0.00671401	2039.61	reachFN1
0.000168803	2000	reachFN1
0.0144606	1131.37	reachFN1
0.0030723	2332.38	reachFN1
0.000115454	894.427	reachFN1
0.000164234	894.427	reachFN1
0.00452284	800	reachFN1
0.00152915	800	reachFN1
0.00944222	800	reachFN1
0.00915891	800	reachFN1
0.000110576	1131.37	reachFN1
0.00205171	1600	reachFN1
5.51739e-05	1442.22	reachFN1
0.015386	1442.22	reachFN1
0.000587707	1442.22	reachFN1
0.0466709	1442.22	reachFN1
0.00195511	1788.85	reachFN1
0.000185118	2154.07	reachFN1
3.86056e-05	1697.06	reachFN1
0.00643977	2561.25	reachFN1
0.000274164	800	reachFN1
1.39821e-07	800	reachFN1
1.01108e-05	1264.91	reachFN1
0.0109175	2529.82	reachFN1
0.000899764	1200	reachFN1
0.00161662	565.685	reachFN1
0.00615797	894.427	reachFN1
0.00105359	1442.22	reachFN1
0.000108258	1442.22	reachFN1
0.00209781	1442.22	reachFN1
0.000290054	1649.24	reachFN1
0.00070373	894.427	reachFN1
0.00683569	1264.91	reachFN1
0.00398582	1442.22	reachFN1
0.000784365	2529.82	reachFN1
8.6395e-05	894.427	reachFN1
0.0024595	894.427	reachFN1
3.6411e-05	894.427	reachFN1
0.000264515	800	reachFN1
1.30892e-05	1131.37	reachFN1
0.000403606	1131.37	reachFN1
0.00322345	400	reachFN1
0.000967334	1442.22	reachFN1
0.00246023	0	reachFN1
0.00506009	0	reachFN1
0		reachFN1
0.000475263	1788.85	reachFN1
6.93015e-05	1788.85	reachFN1
0.00490696	800	reachFN1
0.000443952	2529.82	reachFN1
0.00214286	2529.82	reachFN1
4.35283e-06	1200	reachFN1
9.56579e-05	1264.91	reachFN1
9.80743e-05	1600	reachFN1
0.000375	1600	reachFN1
0.00298086	2000	reachFN1
0.000976129	565.685	reachFN1
0.00256902	2400	reachFN1
0.000241643	1264.91	reachFN1
0.000492448	894.427	reachFN1
0.000514532	894.427	reachFN1
1.64636e-05	894.427	reachFN1
0.000612916	894.427	reachFN1
0.00165856	565.685	reachFN1
0.000542003	400	reachFN1
0.000300908	565.685	reachFN1
0.00396397	565.685	reachFN1
0.000538212	565.685	reachFN1
2.87584e-05	894.427	reachFN1
0.000147719	2561.25	reachFN1
0.000266966	2039.61	reachFN1
1.83625e-05	1697.06	reachFN1
0.000120472	2039.61	reachFN1
2.26502e-05	2039.61	reachFN1
2.28314e-05	2154.07	reachFN1
0.00119943	1264.91	reachFN1
6.6441e-05	2561.25	reachFN1
1.55098e-05	2561.25	reachFN1
0.000216216	1442.22	reachFN1
0.00346636	1442.22	reachFN1
2.7082e-07	1697.06	reachFN1
0.00087637	1649.24	reachFN1
0.00295604	2683.28	reachFN1
0.00021534	1442.22	reachFN1
0.000184894	1442.22	reachFN1
2.10627e-06	1442.22	reachFN1
0.000168772	894.427	reachFN1
0.00121255	2000	reachFN1
0.00158912	2000	reachFN1
0.00132961	800	reachFN1
7.96149e-05	800	reachFN1
0.00129772	800	reachFN1
0.000234978	1264.91	reachFN1
0.00121035	1264.91	reachFN1
6.98288e-05	1264.91	reachFN1
5.03581e-05	1264.91	reachFN1
8.45882e-05	1649.24	reachFN1
0.000550607	1649.24	reachFN1
0.00012031	1442.22	reachFN1
0.00473034	1442.22	reachFN1
0.00471416	1697.06	reachFN1
0.0046421	2000	reachFN1
0.00124686	1131.37	reachFN1
0.00025775	1131.37	reachFN1
0.00654569	2332.38	reachFN1
0.000353259	800	reachFN1
0.00151572	894.427	reachFN1
0.00145221	894.427	reachFN1
0.000190425	894.427	reachFN1
0.000524351	1649.24	reachFN1
0.00154743	1649.24	reachFN1
0.00228604	1131.37	reachFN1
0.00381445	1600	reachFN1
0.00160073	1442.22	reachFN1
2.95945e-06	1649.24	reachFN1
0.00193215	1788.85	reachFN1
0.00129014	1788.85	reachFN1
2.74079e-05	2154.07	reachFN1
2.51508e-06	2154.07	reachFN1
0.000594195	2000	reachFN1
0.00026013	1442.22	reachFN1
0.000343796	894.427	reachFN1
0.00107519	800	reachFN1
0.00104686	800	reachFN1
0.0124569	400	reachFN1
0.00165068	1442.22	reachFN1
2.34243e-06	1788.85	reachFN1
0.000167498	400	reachFN1
0.00947518	2154.07	reachFN1
5.86748e-05	2154.07	reachFN1
0.000905225	2529.82	reachFN1
0.000773127	1200	reachFN1
0.000250404	894.427	reachFN1
0.000635184	894.427	reachFN1
1.12827e-06	565.685	reachFN1
0.00120794	565.685	reachFN1
0.000911405	565.685	reachFN1
0.000499055	400	reachFN1
0.00311631	400	reachFN1
0.000619789	400	reachFN1
0.00185278	565.685	reachFN1
2.58979e-05	565.685	reachFN1
0.000160164	894.427	reachFN1
0.000296477	894.427	reachFN1
0.000141284	565.685	reachFN1
0.000976017	1264.91	reachFN1
0.000267392	400	reachFN1
0.000149245	1649.24	reachFN1
0.00276132	1649.24	reachFN1
1.34439e-05	1649.24	reachFN1
0.000142959	1649.24	reachFN1
0.000295365	894.427	reachFN1
4.83095e-05	2039.61	reachFN1
0.000144036	1697.06	reachFN1
7.59301e-05	2039.61	reachFN1
0.000307022	1264.91	reachFN1
0.00329684	1200	reachFN1
0.000168842	2332.38	reachFN1
0.000866227	2332.38	reachFN1
0.000431403	2332.38	reachFN1
4.20876e-05	1264.91	reachFN1
0.000130101	2561.25	reachFN1
0.000117181	1697.06	reachFN1
0.00477545	2000	reachFN1
0.00143875	2332.38	reachFN1
0.000910732	2332.38	reachFN1
0.0006574	2683.28	reachFN1
0.000195439	1131.37	reachFN1
0.004888	1131.37	reachFN1
0.000363354	1788.85	reachFN1
0.000954225	1788.85	reachFN1
2.60881e-05	894.427	reachFN1
0.00019728	2000	reachFN1
4.19943e-06	2000	reachFN1
8.48461e-05	1649.24	reachFN1
0.00363987	2039.61	reachFN1
0.000371511	2000	reachFN1
0.00103374	1131.37	reachFN1
0.0016353	2332.38	reachFN1
0.000137094	894.427	reachFN1
0.00239719	894.427	reachFN1
0.00112915	800	reachFN1
0.000501475	800	reachFN1
8.66634e-05	800	reachFN1
0.00193647	800	reachFN1
0.000606736	1131.37	reachFN1
3.64878e-08	1600	reachFN1
0.000151464	1442.22	reachFN1
0.00395785	1442.22	reachFN1
0.000549375	1442.22	reachFN1
0.00160184	1442.22	reachFN1
0.000803669	1788.85	reachFN1
0.000584133	2154.07	reachFN1
0.000275395	1697.06	reachFN1
0.00254335	2561.25	reachFN1
2.84437e-05	800	reachFN1
0.000116174	800	reachFN1
1.23157e-06	1264.91	reachFN1
0.00558036	2529.82	reachFN1
4.64959e-05	1200	reachFN1
5.57817e-05	565.685	reachFN1
0.00111457	894.427	reachFN1
1.77459e-06	1442.22	reachFN1
8.40151e-06	1442.22	reachFN1
0.000275561	1442.22	reachFN1
1.1193e-06	1649.24	reachFN1
3.89788e-05	894.427	reachFN1
0.000615567	1264.91	reachFN1
4.60315e-05	1442.22	reachFN1
0.000356812	2529.82	reachFN1
2.90848e-05	1200	reachFN1
0.00154794	1200	reachFN1
0.000111246	1200	reachFN1
0.000208068	2529.82	reachFN1
0.000356981	800	reachFN1
0.000150312	800	reachFN1
0.00037668	2154.07	reachFN1
1.75613e-05	400	reachFN1
1.0872e-05	1788.85	reachFN1
0.000651664	1788.85	reachFN1
0.00021462	1788.85	reachFN1
0		reachFN1
0.000536587	0	reachFN1
0.000828169	1131.37	reachFN1
6.12309e-05	800	reachFN1
3.34083e-05	800	reachFN1
0.000195158	894.427	reachFN1
0.000592046	2828.43	reachFN1
5.76865e-05	800	reachFN1
2.06599e-06	800	reachFN1
2.72404e-05	894.427	reachFN1
5.03088e-05	2039.61	reachFN1
0.000589453	1131.37	reachFN1
9.11275e-05	3046.31	reachFN1
0.000195484	2683.28	reachFN1
0.000701097	894.427	reachFN1
1.32876e-05	894.427	reachFN1
0.000258411	894.427	reachFN1
0.000196969	2332.38	reachFN1
1.58912e-05	2000	reachFN1
0.00014034	1697.06	reachFN1
0.000178936	1697.06	reachFN1
2.62443e-05	1697.06	reachFN1
1.88581e-05	1442.22	reachFN1
0.000303717	894.427	reachFN1
0.000253964	2332.38	reachFN1
2.47542e-06	2828.43	reachFN1
0.000102723	1697.06	reachFN1
3.32733e-05	1697.06	reachFN1
8.01583e-05	1442.22	reachFN1
0.00295188	1264.91	reachFN1
8.72506e-07	1200	reachFN1
4.35769e-06	1200	reachFN1
0.00040421	894.427	reachFN1
0.00206544	894.427	reachFN1
9.69336e-05	565.685	reachFN1
8.11312e-05	2154.07	reachFN1
0.000349496	894.427	reachFN1
4.40954e-05	2800	reachFN1
0.000106011	2800	reachFN1
9.41539e-05	2800	reachFN1
1.38447e-05	2000	reachFN1
0.000277812	894.427	reachFN1
0.00015199	894.427	reachFN1
3.85162e-05	1600	reachFN1
0.00053956	1600	reachFN1
0.000882253	1600	reachFN1
3.39131e-05	1264.91	reachFN1
0.00056015	1264.91	reachFN1
9.45245e-05	1264.91	reachFN1
0.000657737	1264.91	reachFN1
0.000385486	1200	reachFN1
9.35668e-05	1200	reachFN1
1.30723e-05	2154.07	reachFN1
0.000769911	2154.07	reachFN1
0.000917263	2039.61	reachFN1
0.000102255	2000	reachFN1
8.88585e-07	2884.44	reachFN1
7.95055e-05	2884.44	reachFN1
0.00102322	2039.61	reachFN1
0.000274209	2262.74	reachFN1
0.00101904	2000	reachFN1
6.17133e-05	2000	reachFN1
0.00134707	2000	reachFN1
[truncated: 89,876 more rows]

## Sheet: Fig1d_n_TY
Distance	Wji
0	151
400	691
565.685	640
800	619
894.427	1176
1131.37	530
1200	507
1264.91	986
1442.22	904
1600	418
1649.24	811
1697.06	391
1788.85	689
2000	959
2039.61	601
2154.07	513
2262.74	237
2332.38	437
2400	214
2433.11	390
2529.82	371
2561.25	357
2683.28	309
2800	130
2828.43	384
2884.44	244
2912.04	222
3046.31	186
3124.1	161
3200	58
3224.9	249
3298.48	84
3394.11	51
3417.6	74
3440.93	86
3577.71	65
3600	32
3622.15	53
3687.82	92
3773.59	42
3794.73	23
3939.54	27
3959.8	11
4000	26
4118.25	14
4252.06	6
4326.66	4

## Sheet: FigS1c_reachFN1
0	6.09505e-05	0.000280798	5.80989e-05	0.000135168	2.44653e-05	2.39709e-06	1.77173e-05	0.00025137	1.08979e-05	8.11408e-06	2.22063e-06	0.000265856	3.86805e-06	6.00179e-05	0.000135709	4.79559e-05	5.40655e-05	9.51938e-05	9.23516e-05	0.00012712	0.000243081	9.54861e-06	0.000142477	0.000184643	8.8791e-05	5.99312e-05	0.000117716	6.42483e-06	1.51429e-05	8.60507e-05	3.40724e-06	0.000593247	1.72646e-05	3.08275e-07	8.24346e-06	0.00064399	0.000127918	3.25078e-05	1.107e-05	4.40378e-05	0.00133147	0.000833409	0.0002926	0.000135739	2.54313e-05	0.000811249	0.000183305	0.000400545	2.6525e-05
9.54595e-05	0	9.56011e-05	0.000111634	4.36562e-05	0.000150749	5.2157e-07	0.00103906	0.000571312	1.94401e-05	1.20183e-06	1.73528e-06	0.00013263	2.90239e-06	3.24887e-05	0.000489412	0.000318027	0.000746741	0.000421214	9.00668e-06	2.67747e-06	0.000566579	6.99211e-05	0.000482218	0.000949312	0.000154272	0.000474519	1.04452e-05	8.62367e-05	4.32351e-06	0.000864525	0.000102133	0.000515978	0.00173951	0.000147907	0.000947644	0.000655445	0.000322979	0.000774757	4.88616e-06	7.73465e-05	0.000260036	0.00217185	0.000202712	5.31684e-05	0.000153781	2.23634e-05	0.00227488	7.89386e-05	0.000610847
0.00113855	0.00014563	0	0.000238865	2.28124e-05	0.000102414	0.000272371	9.03426e-05	0.000164179	7.8186e-05	0.000132134	0.00020884	0.000142441	0.000755946	1.2444e-06	0.000596525	2.64277e-05	0.000150296	0.000820564	0.00148548	1.96308e-05	9.44118e-05	0.000292596	0.000318194	0.000487748	0.000210354	5.03076e-05	0.0021837	4.34327e-06	7.07066e-06	0.000466204	0.000112221	1.64909e-06	2.9737e-06	3.583e-05	0.000228972	2.88973e-05	0.000225884	0.000983059	0.000174359	1.49889e-05	0.000301065	1.50149e-05	8.13159e-06	0.000117398	2.11816e-05	0.000199111	1.04236e-05	0.000680397	0.000110762
0.000186805	8.78241e-05	0.000304061	0	6.12294e-05	1.22041e-05	0.000248685	0.000433908	3.3002e-06	0.000439844	0.00168534	5.84734e-05	0.000443325	9.80798e-06	4.50962e-05	3.90259e-05	6.83056e-05	0.000309855	6.84109e-05	0.000441018	7.14889e-05	0.000219065	0.000159018	0.000922047	0.000256106	9.67728e-05	2.58209e-05	2.69916e-06	0.000577143	2.59889e-05	0.000162518	0.000336673	0.000532473	4.18589e-05	0.000859424	1.43067e-07	0.0021676	0.000235625	0.000313753	0.000688644	0.00108178	1.71133e-05	0.000110306	0.000783473	0.000591867	0.0011273	0.000409217	6.56776e-06	3.97936e-07	0.00106932
8.41944e-05	5.31154e-05	0.000286712	0.00107629	0	6.53486e-05	7.98157e-08	3.11781e-05	0.000242831	1.41708e-07	4.13799e-05	0.000832093	8.80454e-05	0.00144125	0.000362722	0.00186187	1.93856e-05	0.000348433	0.00148974	5.25522e-07	0.000384059	0.000890821	0.000141707	7.84417e-05	3.36044e-06	0.0008588	0.00106412	4.11607e-08	0.000297657	0.000389351	0.000359424	0.000321551	0.000920787	0.000239712	0.000722284	0.00194959	0.000382837	0.000140517	0.000600029	5.82139e-05	0.000293068	0.00109176	1.42067e-05	0.000255179	0.00518193	0.000231003	9.32461e-05	0.000268185	0.00148066	0.000989503
5.30099e-05	7.50906e-05	7.46005e-05	0.000274223	0.000471636	0	6.81496e-06	7.40913e-05	0.000856443	2.14219e-05	0.00114542	0.000173676	0.000107345	6.38667e-05	0.00215245	0.000311739	0.000493344	3.24246e-05	0.00138552	5.48612e-05	1.27588e-05	0.001193	0.000400994	0.000372628	0.000403195	0.000429354	0.00194288	0.000280693	0.00176853	0.000233496	1.47069e-05	0.000222216	0.000524442	5.93803e-05	0.0011075	0.00068608	0.000612966	0.000461039	0.000198702	7.38146e-05	0.000326706	0.00019275	1.81375e-05	0.000892751	0.00100161	0.000432304	0.00131816	8.91304e-05	0.000720112	0.000635482
0.000153516	1.98412e-11	3.53182e-06	0.000116728	2.077e-05	6.66231e-05	0	0.00016991	0.000399622	1.02567e-05	0.00214324	1.30706e-07	0.000713773	4.8449e-05	0.000473395	0.00139195	1.62338e-06	0.000970296	0.000128851	0.000343925	4.53346e-05	8.13669e-06	0.000315712	0.00133861	0.000208143	2.33157e-06	0.00035424	0.00123765	2.56917e-05	0.000934447	3.71889e-05	0.000151836	0.000456681	1.85946e-06	0.000709154	0.000258181	0.000379194	0.000163858	4.12651e-06	0.000237515	9.46441e-05	0.000835649	0.000359964	0.00109335	0.000968382	0.000488678	0.00191292	0.000408055	0.000766094	0.00022572
1.46056e-05	0.00139416	2.18137e-06	0.000790849	0.000191638	0.000280823	0.000211166	0	2.54935e-05	3.67193e-05	2.77333e-05	3.22096e-05	0.000284487	0.000179665	7.9414e-05	0.00029453	0.000444617	3.47619e-05	0.000893923	4.18207e-06	8.80568e-05	9.53491e-08	0.000181563	0.000938721	4.14335e-05	0.000360661	2.27326e-05	0.000576545	1.89819e-05	9.46925e-05	0.000652749	0.00134951	0.00298142	0.000361495	0.00107521	0.000253064	0.00198788	0.000220138	0.000475009	0.00053124	0.00110403	0.00057967	0.00120736	0.0023169	0.000541111	0.00147236	0.00383901	0.000514648	0.00273797	0.000815917
0.000160788	0.000265691	3.587e-08	1.28914e-06	0.000295089	7.98102e-05	0.000644755	9.00453e-05	0	9.7078e-05	8.27623e-05	0.0019557	1.57649e-06	0.000651277	0.000477059	5.04077e-05	0.000628261	0.000174805	0.000509382	2.34407e-06	8.41752e-05	8.05527e-05	0.00108197	0.000773205	0.000230616	0.000623645	3.3123e-05	0.00123562	6.21315e-05	0.0017947	0.000866597	0.000369636	2.90176e-06	0.000787754	0.000530924	0.00227988	0.000559031	0.000211699	0.00249914	8.77425e-05	9.09156e-05	0.000468412	0.00120907	0.000754847	0.00124092	0.000754503	0.000251354	0.000247708	0.000466054	0.000846339
0.000127056	0.000422248	8.49594e-05	0.000193955	6.7257e-06	0.000448916	7.04568e-06	0.000124662	0.000262228	0	0.000612865	1.76755e-05	9.22836e-05	6.95342e-05	5.47748e-06	0.000984266	0.000125875	0.000175708	0.000571924	0.000340448	0.00130191	0.00116486	0.000111649	0.000739215	0.000283052	0.000278492	3.66035e-05	0.000243162	0.00244166	0.000364438	0.000257251	1.92334e-05	0.00134601	0.00109959	0.000431596	0.000208816	0.00305761	0.000298214	0.00298534	0.00013507	0.000184306	0.0013243	1.80265e-05	0.000882735	0.000760946	0.00122327	0.00271352	0.00120383	0.000921179	0.00146045
4.75831e-06	6.22471e-05	3.49819e-05	0.000291205	0.000561694	0.000918067	0.00166495	1.93671e-05	0.000326026	0.000611379	0	0.00068624	8.28835e-06	0.000660145	0.000992479	0.000435515	3.15647e-05	0.00244119	5.04846e-05	0.00125333	1.78302e-05	0.000194713	0.000672934	0.00031078	0.000968393	1.82371e-05	0.000947546	0.000308045	0.000374049	0.000510943	1.69445e-06	0.000892779	0.000802403	5.94556e-05	0.00212581	1.03239e-05	0.00123441	8.65518e-05	0.000103222	0.000326635	0.000654113	0.000981781	0.00102011	0.000993233	0.000961001	0.00182766	0.000676507	0.000837652	0.00068743	9.20386e-05
3.82648e-05	3.83322e-05	3.54297e-05	8.65567e-07	0.000647094	0.000435683	0.000677876	2.23303e-05	0.000371037	6.73272e-05	0.000643393	0	0.000297449	0.00177506	0.000126112	0.000931752	0.000649558	0.000819015	0.00156083	0.00119934	0.00113599	1.55868e-05	0.00179954	0.000917579	8.71997e-05	0.00238823	6.08615e-05	0.00140314	7.1156e-05	0.00247829	2.83206e-05	0.00012265	0.00037295	0.0017124	0.00139203	0.00355622	0.0011265	0.00114541	0.000737566	0.000527927	0.00177688	0.00110921	0.00261957	0.00043452	0.00255911	1.95093e-05	7.22814e-08	0.00211904	0.000302481	0.000304948
6.79904e-05	0.00020674	0.000161279	0.000381526	3.09243e-05	0.000914496	0.00112076	0.000588614	0.000285822	0.000480592	6.87751e-05	0.000519825	0	9.61226e-05	0.000701985	0.0003759	0.000324696	5.8263e-05	0.000862371	2.1662e-05	3.99254e-05	5.04679e-05	0.00133798	5.45344e-07	0.000197707	0.000202688	0.000558049	0.000203678	0.00320871	8.20976e-06	0.000982828	5.52684e-05	2.81087e-05	0.00020724	4.94968e-05	0.000130038	0.00112242	0.000346814	0.0011852	0.000141791	4.2752e-05	9.44393e-05	0.00386312	0.000218242	0.000145105	0.00240419	3.88565e-06	0.000797353	7.17744e-09	0.00293885
1.20921e-05	6.34782e-06	4.07849e-05	1.07609e-06	0.000500108	5.46553e-05	3.33264e-05	9.24704e-06	0.00128688	7.48876e-05	2.85217e-05	0.00154001	6.94115e-05	0	0.00175269	0.00176547	0.000210581	0.000117651	5.47862e-06	9.17576e-07	0.000102294	4.82769e-05	0.00376378	2.08542e-05	0.000814212	0.000548689	0.00122762	0.000660287	0.000845445	0.000180471	0.000206779	0.00324257	0.00142192	0.000510878	0.000132318	0.00241486	0.00301803	3.6185e-05	0.00135446	0.00031072	0.000589083	0.000102593	6.19004e-05	0.00309571	0.00133621	0.000745524	0.00268704	0.00463452	0.00136126	0.000269332
0.000145819	1.84732e-05	0.000142109	9.54725e-06	0.000407541	0.000539468	2.76377e-05	0.000191901	4.03994e-05	2.18093e-05	0.000346435	0.000627865	0.000331779	0.0015923	0	0.000886216	0.000154511	0.00103696	0.000404035	0.000715713	0.00135877	0.000133703	0.000566398	0.000665757	0.000697756	0.000520275	0.000701312	0.000318931	0.000684288	0.000813429	3.72031e-05	0.00292728	0.000625779	0.000928394	0.00104077	0.000481411	0.00154776	0.000781758	0.000697282	0.000880717	0.00121283	0.00149596	0.000279555	0.00281856	0.000928875	0.00228001	0.000149799	4.16053e-05	0.00157232	0.00142233
8.03013e-05	2.24267e-05	1.48288e-05	0.000196849	0.00263569	0.000937053	0.00079646	0.000625246	0.000241223	0.000606528	0.000739015	0.00139778	0.000896429	0.00162197	0.000726305	0	0.000472094	0.000646914	0.00188214	3.3606e-06	2.50052e-06	0.00101487	0.00292719	0.000205316	0.00322864	1.17213e-06	0.00237744	0.00015601	0.000240933	0.000519188	8.03197e-06	3.83562e-05	0.00231272	0.000512165	0.00267034	0.000425465	0.00412204	1.19464e-07	0.00034092	0.000379238	0.000644016	1.02042e-05	9.62145e-05	0.000290907	0.0023277	0.000170488	0.000154922	0.000184425	0.00025848	7.10876e-05
4.98594e-05	0.00108565	1.14823e-05	4.28841e-05	1.65065e-05	0.000531302	6.19204e-05	7.32809e-05	0.000103226	0.000629519	2.41327e-05	0.00197796	0.000404277	0.000275715	0.00046616	0.000126314	0	0.000160671	0.000187517	4.8209e-05	0.000345628	5.57737e-05	0.00022911	0.00010595	3.84583e-05	0.00118464	0.000141823	0.000944909	0.00134836	0.00161298	0.0002893	0.000286059	5.0931e-05	0.00450631	0.00088743	0.00593234	0.00136789	0.00146579	0.00381235	0.000392834	0.00192112	0.000253478	0.0017319	0.00191702	0.00113329	0.00103844	0.000786349	0.00258046	0.00169925	0.000673839
1.74303e-07	6.20016e-05	2.20693e-05	1.32809e-05	9.52801e-05	0.00124615	0.000873431	0.000645957	4.43038e-06	0.000119572	0.00295829	0.000461882	0.000164603	0.000316274	0.00102557	0.000921619	8.39622e-05	0	0.000361398	0.00120876	0.000860037	0.000371581	0.00119131	0.000179265	0.000656215	0.000555639	0.000333215	1.32182e-07	4.35866e-05	0.000310061	0.00126221	0.000190409	0.00182735	7.57435e-05	0.00431193	0.000763228	0.0024599	0.00188	1.23732e-05	0.00117004	0.00250793	0.00174537	0.00189424	0.00187492	0.00202063	0.00115005	6.62629e-05	1.72572e-06	0.00105679	0.000304523
0.000126464	2.13861e-05	0.00170666	0.000127129	0.00113809	0.00133947	5.87046e-05	0.000676421	0.000270816	0.000226315	0.00017058	0.000616022	0.000690959	0.000300632	0.000600325	0.00172835	0.000259023	8.43325e-05	0	0.000479628	0.000227049	0.00410406	0.000239691	0.000164678	0.000183561	1.81077e-05	0.000146863	0.001181	1.31658e-05	0.00037076	0.000253935	0.00055177	2.43082e-06	0.000459549	0.000329678	0.00122755	0.00552088	0.000156018	0.00218494	0.000920892	5.46387e-06	0.000795931	0.00296057	0.00106817	0.000859087	0.00142145	0.000518216	0.00188477	0.000104477	0.00301672
2.38339e-05	0.000436794	0.000707209	0.000574045	1.5596e-06	2.65107e-05	0.000292875	7.76859e-06	6.67248e-05	2.52411e-05	0.000195088	0.00132796	2.39836e-08	4.97862e-06	0.000645455	5.05372e-05	3.09015e-05	0.00177526	0.000150811	0	0.00211972	0.000338862	0.00280329	0.00267258	0.00195277	0.00106709	0.0022783	0.00133077	0.00060049	0.00175177	9.57434e-05	2.95344e-06	0.00224264	0.000449095	0.00455813	0.000521271	0.00390627	0.00141383	2.68271e-05	0.00074749	0.00181036	0.00155504	0.00104834	0.00142829	0.00445866	0.0016581	0.00144657	0.000867222	0.00111562	0.00140664
4.41591e-05	2.18034e-05	0.000524858	0.000115704	4.16163e-05	0.00013728	0.000251992	0.00012161	0.000179485	0.0026055	0.000427541	0.00204252	0.00102522	0.000100905	0.0010112	2.02636e-06	0.000102333	0.000876467	0.000149754	0.00232478	0	6.79401e-06	0.00112347	0.000739422	9.82554e-05	0.000214657	7.10576e-05	0.00260209	0.00109366	0.00199314	0.00097055	0.000388208	0.000744837	0.00161999	0.0017988	0.000267575	0.00249012	0.00185948	0.000143578	0.00106919	0.00317484	0.000955942	0.000771594	0.000389304	0.00193121	0.00205908	0.000212545	0.000372078	0.000746781	0.00177354
0.000633352	4.8497e-05	1.28386e-05	0.000421551	0.00238731	0.00167454	5.84501e-05	7.94322e-05	0.000244541	0.000924838	0.000846077	0.000151133	2.91784e-05	0.000792477	0.000108782	0.00146627	0.000160184	0.000360308	0.0051116	0.000397905	0.000311064	0	6.6277e-05	7.61564e-05	2.47459e-05	0.00183406	0.00525052	0.000492633	0.00257195	5.58238e-06	0.00165482	0.000266604	0.000580212	0.00136473	0.00126595	2.94471e-05	0.00589713	0.000656482	0.000849365	0.000598921	0.00154604	0.00101495	0.00563073	0.00218288	0.00110155	0.000222021	0.00119245	0.00181559	0.000697628	0.000642306
0.000219404	3.37959e-05	6.15099e-05	0.00011431	0.000486613	0.00067971	0.00170484	1.99836e-05	0.000599793	1.33725e-05	0.000269681	0.00441584	0.000568833	0.00163228	0.000517745	0.00114752	0.000125746	0.00061536	4.65464e-05	0.000840769	0.000186726	6.3562e-06	0	0.000381162	0.00162547	2.32917e-06	0.00102249	0.00181386	0.000223897	0.0025032	0.00137186	0.000212308	0.0010513	0.001131	0.00259821	0.00224027	0.00380793	0.000476117	0.000125627	0.000628495	0.000443556	0.00175962	0.00455155	0.00262142	0.00289662	0.000999025	0.00341847	0.000863877	0.0016809	0.000915337
0.00056899	0.000862972	0.000346085	0.000603338	4.6419e-05	0.000110256	0.00124271	0.000420562	0.000213669	0.000241748	8.66712e-05	9.82282e-05	2.17507e-05	0.00010356	0.000453749	1.96159e-07	0.000261156	9.42365e-05	1.64976e-05	0.00181049	0.000251136	3.70736e-05	0.000285741	0	0.00160739	1.13273e-07	0.00258961	7.27108e-05	0.00103529	0.000674029	9.11514e-06	0.00051878	0.00398296	0.00108239	0.000448049	0.000321475	0.00162929	0.00197139	2.9225e-06	0.00176998	0.00143333	0.00120489	8.24726e-05	0.000991482	0.000360419	0.00257877	0.00407473	4.93777e-06	0.00276003	0.00174185
0.000593912	0.000868292	0.000134001	0.000378352	4.01205e-05	8.24177e-05	0.000317312	0.000322226	7.00597e-05	1.24092e-05	0.00143655	0.000934071	0.00038329	0.000605015	0.000924371	0.00148409	0.00023949	0.000632858	5.01622e-06	0.00137039	0.00022054	0.000309475	0.00336197	0.00124328	0	1.20889e-06	0.00633656	0.000156912	0.000974154	0.00124466	1.95908e-05	0.000209664	0.00323801	5.13172e-05	0.00217904	4.8224e-06	0.00801996	0.00121716	0.000255477	0.00060942	0.00121453	0.00038096	9.16027e-05	0.00283876	0.000735475	0.00209713	0.000988618	3.90589e-05	0.000973273	0.00111309
7.54638e-05	0.000213494	0.000545486	2.70089e-05	0.00114316	6.78529e-05	1.36857e-05	0.000250075	0.000408979	0.000114517	6.65263e-06	0.00212303	6.21746e-08	0.000141045	0.000808484	1.04219e-07	0.00215199	0.000235395	0.000108382	0.00288954	0.000422303	0.00181805	5.23459e-05	0.000644466	8.37643e-06	0	0.00130255	0.00167519	0.000254454	0.000294942	0.00121683	0.000405492	0.00117637	0.000457651	0.00183636	0.00276089	0.00250215	0.00465812	3.77599e-05	0.000715501	0.00260132	0.00286216	0.00258648	0.000409715	0.00157653	0.00117999	0.00162701	0.00273539	0.0021047	0.00278184
2.7297e-05	0.00026746	5.43648e-05	3.86423e-05	0.000395072	0.00106323	0.000480893	0.000163613	5.71404e-05	0.000189829	0.00076823	0.00096166	0.000549613	0.00116753	4.14052e-05	0.00168447	2.06491e-05	0.000754434	9.2049e-05	0.00117687	0.000280632	0.0027943	0.00288071	0.00143845	0.00226386	0.000492056	0	0.00025236	0.000162499	0.00108287	0.000383805	0.00196252	0.0029991	0.00128514	0.00203306	0.000154381	0.00445954	0.000563979	0.000659348	0.000379293	0.000787852	0.00360672	0.00250548	0.00375167	0.00189365	0.00145711	0.00279714	5.92542e-05	0.00276849	0.00135658
3.0414e-05	8.29782e-05	0.00192926	1.08062e-06	9.16712e-06	0.000352333	0.00217204	0.000174966	0.00192114	9.41755e-06	5.50792e-05	0.00195458	0.00108012	0.000550748	0.000337738	0.000654933	0.00166015	0.000499221	0.000721888	0.00147783	0.00244943	0.000566347	0.00314773	0.000597631	0.000849097	0.00181736	0.000552568	0	0.00085984	0.00134937	0.00162059	0.000772037	0.00156163	0.00288422	0.00404467	0.0020159	0.00521803	0.00105187	0.00337117	0.00185424	0.00269475	0.0020058	0.00283788	0.00498691	0.00380741	0.00214624	0.00203485	0.00224545	0.00317543	0.00147004
4.03748e-06	7.66229e-05	1.99265e-05	0.000900868	0.00160631	0.00130758	0.000358117	9.25673e-05	0.000408705	0.000199245	0.00136137	5.4292e-05	0.00285353	0.000508995	0.000945151	0.000107497	0.00111701	0.000197098	5.39978e-05	0.00203655	0.000952945	0.00277832	0.000283793	5.6458e-05	0.00095295	0.000310054	0.000191073	0.00125614	0	0.000738758	0.000270584	0.00115199	3.83845e-05	0.00110319	0.00127457	0.000454077	0.00450517	0.0035753	0.000567891	0.000462807	0.00339978	0.00300147	1.13939e-05	0.000321473	0.00078756	0.00350118	8.12617e-06	0.00116506	0.00106036	0.00337478
5.25472e-05	0.000264528	0.000247157	0.000857115	0.000981652	0.000553467	0.00056509	9.48916e-05	0.00222119	0.000159574	0.00112644	0.00197905	0.000313751	0.000531166	0.000652721	0.0015068	0.000154653	0.000492582	0.000485717	0.00238926	0.00275932	0.000383723	0.00200537	0.00107614	0.000774128	6.96161e-05	0.00165057	0.000574706	0.00150179	0	0.000352721	0.000479882	0.00109977	0.00088684	0.00407311	0.00190279	0.00327996	0.00199655	0.00156258	0.000121819	0.00141947	0.00184843	0.000585855	0.000669153	0.00614194	0.00132675	0.000748907	0.000816301	0.00106677	0.000610959
6.01797e-06	0.00101458	5.43952e-05	4.94348e-06	0.000198762	0.000125677	4.45229e-05	0.000292957	0.000328489	8.16733e-05	2.05221e-05	0.000735993	0.000489771	0.000124565	9.81942e-05	9.82684e-05	0.000891315	0.000889561	0.000398663	0.000221013	0.000318442	0.0013995	0.0011261	0.000226539	2.75137e-07	0.00170073	0.000202851	0.00170595	0.000107165	0.00056252	0	0.00182736	0.00072348	0.00132647	0.00092301	0.00415061	0.0027181	0.000833197	0.0025974	6.14258e-05	0.0018142	0.00287971	0.00303312	0.00596984	0.00121301	0.00273615	0.00310231	0.00403768	0.00361866	0.00130934
2.08082e-05	5.17863e-06	2.5878e-05	0.000281213	0.000694651	0.000159995	1.80947e-05	0.000452589	0.000962737	9.48403e-05	0.000307216	0.000114564	1.00367e-05	0.0061983	0.00436715	4.84836e-05	0.000406314	0.000391556	7.58704e-05	0.00130434	3.82299e-05	0.000526361	0.000403591	0.0015319	0.000421043	0.000697441	0.00146199	0.000286304	0.0018754	0.000174266	0.00180659	0	0.00277685	0.00136999	0.00229467	0.0029028	0.00302693	0.0025238	0.00150226	0.000875513	0.00220306	0.00131411	0.000904536	0.00652115	0.000775389	0.00179866	0.00358634	0.00214684	0.00595532	0.00330585
0.000258272	0.000694141	3.45479e-09	0.000150519	0.000643485	0.000234457	0.000363566	0.000903065	6.5794e-05	7.52234e-05	0.000549287	0.000769113	9.28558e-05	0.00234337	0.000697734	0.00225002	0.000129447	0.000651833	5.23232e-07	0.00339035	0.000167631	0.000330415	0.00157901	0.00278595	0.00228434	0.000903619	0.00241043	0.000911062	3.22084e-05	0.000818753	0.00100174	0.00281709	0	0.00234409	0.00380974	0.00128305	0.00451059	0.00289777	0.000657926	0.000800798	0.00222068	0.00225376	0.000719603	0.00963428	0.00274582	0.00275902	0.00155516	6.19532e-05	0.00400188	0.00219461
1.53448e-05	0.000135753	2.13622e-05	7.91783e-05	0.000584557	0.00105155	8.50355e-07	2.07744e-06	0.000128336	0.000346699	8.12735e-05	0.00161609	0.000181987	0.00100569	0.000445153	0.00109697	0.00227219	0.000328452	0.000554905	0.000899495	0.000749909	0.000820972	0.001064	0.000321761	0.000462823	0.000427936	0.00142266	0.00132257	0.000714738	0.000926545	0.00162117	0.00142674	0.00294823	0	0.00145297	0.00374239	0.00425103	0.0022661	0.00548459	0.00171535	0.000133356	0.00472913	0.00559664	0.00326768	0.00473992	0.00222909	0.00133011	0.00395143	0.004168	0.0033523
0.000192189	0.000164788	0.000113546	0.000584067	0.00175299	0.0013439	0.00279567	0.00187043	0.000198405	4.41838e-05	0.000632716	0.0020238	6.85453e-06	0.000499112	0.000549308	0.00310283	0.000110742	0.00317367	0.00012052	0.0037683	0.000883257	0.00127734	0.00506731	0.000617724	0.00137687	0.000574025	0.003216	0.00305116	0.00052641	0.00342027	0.000356575	0.000504615	0.00575986	0.00182833	0	0.00133464	0.00721066	0.00113832	0.00167236	0.00118075	0.00400389	0.00225861	0.00113585	0.00266835	0.00888082	0.00321329	0.00167439	0.00136013	0.0036523	0.00249349
0.000471967	0.000764941	0.000111839	0.000185545	0.00235766	4.32312e-05	0.000111434	0.000125097	0.00352534	4.27193e-06	0.000176057	0.00466402	7.86245e-05	0.00224764	0.00168909	0.000612997	0.00388762	0.00106517	0.00109907	0.000454609	3.80586e-05	0.000295752	0.00239369	9.80368e-08	0.000311112	0.00210873	0.00110382	0.00221354	0.000309547	0.00298668	0.00178925	0.00105992	0.00112012	0.00311397	0.00110359	0	0.00249927	0.00137452	0.0063159	0.00150616	0.00282708	0.00569357	0.00914715	0.00277077	0.00529257	0.00141826	0.00135587	0.00616329	0.00542015	0.00359045
5.36451e-05	0.000204745	3.76441e-08	0.00040824	0.000511081	0.000615986	0.0010157	0.000882381	4.4893e-07	0.000587737	0.00189186	0.000709112	9.96888e-06	0.00211252	0.000381892	0.00335058	0.00039818	0.00152295	0.00215676	0.00284329	0.000659586	0.00470796	0.00269487	0.00245282	0.0042123	0.00161586	0.00375772	0.00517484	0.00338286	0.00300042	0.00184135	0.00213951	0.00475834	0.00178724	0.00768526	0.000908712	0	0.00152084	0.00121988	0.00287948	0.00372521	0.0041267	0.00152345	0.00555305	0.00671805	0.00469273	0.00488872	0.00143315	0.00434153	0.00493547
5.81895e-07	0.000226237	0.000481021	0.000399006	1.47926e-06	0.000769664	6.11435e-05	0.000103963	0.00067162	0.000338582	0.000518588	0.00067544	0.000125102	2.09991e-05	0.00118513	8.43808e-05	0.00101259	0.00034244	3.87996e-05	0.00162079	0.00101341	0.000674309	0.00106667	0.0020241	0.00101752	0.00346706	0.00152057	0.000353725	0.00196734	0.00200903	0.00112976	0.00182218	0.00265625	0.0037112	0.00279619	0.00184146	0.00388781	0	0.0013785	0.000854628	0.00117816	0.00346576	0.00384746	0.00361756	0.0028862	0.00428532	0.00134726	0.00165812	0.00431619	0.00661461
1.09955e-05	0.000373516	0.000563778	0.00089831	0.00126942	0.00038519	4.52006e-06	0.000178426	0.00400759	0.00246913	3.34325e-05	0.00161325	0.00175602	0.00211796	0.00188277	0.000330012	0.00328673	0.000216916	0.00299612	0.000161109	0.000611065	0.00193148	0.000282814	4.60748e-05	6.94095e-07	0.00199433	0.000573258	0.00451812	0.00120057	0.00156579	0.00176082	0.00189886	0.00268029	0.00493118	0.00191333	0.00703245	0.00391572	0.00127259	0	0.00529015	0.00292948	0.00440009	0.00565878	0.00631088	0.00354251	0.00302509	0.00133231	0.00554994	0.0034449	0.00502664
8.94277e-06	1.41364e-05	0.000142964	0.00217484	1.49232e-05	0.000993434	0.00051247	0.00151926	1.61453e-06	0.000175158	0.00171134	0.000231989	0.000565298	0.000504693	0.00102249	4.76271e-05	0.000481332	0.00165009	0.00206819	0.00199035	0.00155043	0.00182834	0.00166735	0.00313666	0.00190091	0.00073255	0.000324716	0.00188232	0.0016334	0.000739246	0.00109757	0.00207511	0.00448844	0.00139057	0.00783067	0.00116634	0.00781488	0.00261439	0.00628519	0	0.00843607	0.00652017	0.00106475	0.00539638	0.00336137	0.00323531	0.00123686	0.000658516	0.00588592	0.00565391
6.71013e-05	8.67321e-05	1.25437e-05	0.00200559	0.000577598	0.000394265	0.000270309	0.0015446	0.000498851	0.000221566	0.000387013	0.00407885	3.14663e-05	0.000602645	0.00102194	0.00149775	0.000810584	0.00188778	0.000494403	0.00339978	0.00211642	0.00121207	0.000395302	0.00316182	0.00090417	0.00171576	0.00244727	0.00182071	0.00118563	0.00352518	0.00148957	0.00297518	0.00507181	0.000135093	0.00828269	0.0021106	0.00666036	0.00216512	0.0018147	0.00344002	0	0.00423689	0.00125239	0.00387943	0.00605379	0.00242282	0.00296357	0.00170864	0.00521632	0.0034866
0.000763017	0.000189631	4.77403e-06	7.24878e-07	0.00269125	0.000125619	0.000569731	0.000972345	0.000459508	0.000391015	0.00116359	0.000754175	3.24252e-05	0.000786109	0.000444146	0.00052277	3.81584e-05	0.00233014	0.000917428	0.00260054	0.000543353	0.00245389	0.00429352	0.00105001	0.000957361	0.00144577	0.00342551	0.00197354	0.00264955	0.00124424	0.00325778	0.000831259	0.00210735	0.00418571	0.0051696	0.0101451	0.00597355	0.00263184	0.00391869	0.00418398	0.00397096	0	0.00811135	0.00570608	0.00634561	0.00505778	0.00668728	0.00277473	0.00866296	0.00392116
0.000390242	0.00330647	0.000104647	0.000120124	0.000192875	1.52205e-06	0.000162322	0.00105587	0.000923147	8.72033e-06	0.000708694	0.00244489	0.00248276	1.92143e-05	0.000126866	0.000301342	0.00206866	0.000687116	0.00179576	0.00202265	0.000934641	0.00354705	0.00457037	0.000153183	3.0363e-06	0.00161407	0.00169893	0.00361006	1.39789e-05	0.00144083	0.00252546	0.00173431	0.000552446	0.00464545	0.00118449	0.00959648	0.00322724	0.00356403	0.00784182	0.000629218	0.00251393	0.00922812	0	0.00521787	0.00777954	0.000751909	0.00979586	0.0114157	0.00300281	0.00129264
7.50961e-06	1.91151e-06	0.000132967	0.000562913	0.000735447	0.000804803	0.00145837	0.00173572	9.44574e-05	0.000649205	0.000152093	0.00014196	6.72848e-07	0.00280595	0.00145149	0.000359763	0.000620799	0.00136306	0.000953336	0.000780665	0.000378854	0.000416915	0.00240271	0.000951945	0.00132817	0.000745911	0.00385731	0.00305355	1.73733e-05	0.000796623	0.002375	0.00270633	0.00640799	0.00226655	0.00533618	0.00169068	0.0071917	0.00224955	0.0044192	0.00111804	0.00155933	0.00270375	0.00447284	0	0.003155	0.00272948	0.00543331	0.0034424	0.00437327	0.00675343
4.00175e-06	3.0688e-06	0.00020819	0.00016268	0.00294004	0.00246125	0.00204569	0.00020248	0.00105405	0.000482797	0.00360225	0.00356724	0.000680473	0.00114051	0.000838965	0.00435462	0.000393825	0.00219658	0.00182091	0.00469207	0.00174147	0.00152903	0.00796899	0.00191053	0.00169983	0.00168282	0.00454519	0.00328709	0.00108014	0.0059448	0.00108584	0.00105524	0.00408205	0.00285411	0.013283	0.00480709	0.0105694	0.00208692	0.000925549	0.00141354	0.0038717	0.00617548	0.00232745	0.00516778	0	0.00517909	0.00136076	0.000859351	0.00262124	0.00196328
7.74518e-05	3.34018e-05	0.000126263	0.000784453	0.00061724	0.000211654	0.000167335	0.0012311	0.00176464	0.00139439	0.00126268	5.29596e-05	0.000973242	0.000894286	0.00144242	0.000486538	0.000757964	0.00135631	0.00119837	0.00412548	0.000439399	2.41512e-05	0.00202528	0.00239033	0.00178233	0.000821909	0.00149005	0.00324444	0.00428247	0.00159655	0.00269668	0.00329655	0.00552772	0.0012426	0.00450431	0.00145855	0.00857134	0.00381499	0.00192704	0.00228982	0.00364511	0.00292019	2.58937e-06	0.00446821	0.00508675	0	0.00441529	0.00119134	0.00870557	0.00906756
7.03344e-05	0.000108924	0.000201037	7.20327e-05	4.51231e-05	0.00162636	0.00128642	0.00170957	0.00039522	0.000317201	0.000599197	5.38941e-05	4.208e-05	0.00364607	4.3336e-05	4.20705e-06	0.000428199	9.5013e-06	0.000770484	0.00217337	0.00030857	0.00147928	0.00250971	0.00376055	0.000859524	0.00178671	0.00508909	0.000805461	0.000234069	0.00175148	0.00158287	0.00269664	0.00462887	0.00212789	0.00078849	0.00168384	0.00483167	0.00304885	0.00145295	0.000315326	0.00255305	0.00558464	0.00911613	0.0072661	0.000294957	0.00354212	0	0.00934886	0.00605453	0.00316219
0.000387928	0.00139639	0.000266721	0.000284302	0.000362153	9.4776e-05	0.000289213	0.000545157	0.00135217	0.000380865	0.000414879	0.00288568	8.73123e-05	0.00287743	7.72915e-05	0.000281892	0.00287186	4.03908e-06	0.00135878	0.000901771	0.000230094	0.000684794	0.00135125	3.46046e-05	7.50147e-05	0.00296808	0.000705175	0.00266131	0.000829756	0.003353	0.00269053	0.00123858	0.000163434	0.00463047	0.000863691	0.00918793	0.00188167	0.00249028	0.00522087	0.000789903	0.00399079	0.00392592	0.00874529	0.00589201	0.00202855	0.00367011	0.00762238	0	0.00690928	0.00830612
0.00046777	4.22545e-05	0.000129771	1.00432e-05	0.00176579	0.000134589	0.000488459	0.0013998	0.00053015	0.000565284	1.56267e-05	0.000372636	3.67861e-05	0.00111594	0.00184586	0.000720333	0.00203091	0.00274827	4.03059e-06	0.00162895	0.00051139	0.000237103	0.00105911	0.00202506	0.00158854	0.00190711	0.0046491	0.002493	0.000877736	0.00139946	0.00360303	0.00182254	0.00391311	0.00542191	0.00605739	0.00411706	0.00527576	0.00279408	0.00254141	0.00317291	0.00401312	0.0114463	0.00175036	0.00539298	0.00452349	0.011153	0.00638353	0.00710931	0	0.00829006
8.24088e-06	0.000227926	9.5063e-05	0.00110224	0.000227692	0.000503627	0.000692968	0.00145208	0.000228374	0.00313216	0.000120845	0.000332101	0.00234385	0.00110588	0.00210437	1.19883e-05	0.00102308	0.000701738	0.000952509	0.00272155	0.000730935	0.000693534	0.000628191	0.00127582	0.00137432	0.00145418	0.000473906	0.000969537	0.00357247	0.000390356	0.00195181	0.00291303	0.00368523	0.00305993	0.00313345	0.00349888	0.0110822	0.00523297	0.00440813	0.00271689	0.00368797	0.00552214	0.000993588	0.00725592	0.00341625	0.00910889	0.00380545	0.00745109	0.0107125	0
2.63448e-05	9.39553e-06	1.55407e-05	0.00100404	0.000786864	0.0026552	0.000462868	0.000959188	0.000107224	0.000466891	0.00111467	0.00181121	5.58219e-05	0.00350671	0.0012776	0.00151633	0.000622651	0.00181481	0.000662087	0.00211642	0.000700479	0.00112071	0.00466124	0.00304968	0.00432876	0.000668203	0.0113757	0.00173207	0.00220981	0.00154937	0.0024165	0.00464565	0.00756385	0.00212297	0.00566339	0.00408259	0.00837191	0.00274829	0.0014459	0.00307241	0.00456449	0.00549315	0.00158809	0.00648072	0.00599039	0.0113453	0.00540221	0.0027138	0.00724526	0.00526553
2.88287e-05	0.000199679	0.000860367	0.000330575	0.000211232	1.90024e-08	0.000752829	0.00107181	0.000168666	0.000759421	0.000793778	9.3579e-05	0.000877348	0.00109857	0.00325292	0.00013711	0.00251113	0.000928089	3.54338e-05	0.00367924	0.000781105	0.000442196	0.00241453	0.00375693	0.00107125	0.00321158	0.00293084	0.00266649	0.00613287	0.00124831	0.00502915	0.00415714	0.00542153	0.00614222	0.00347226	0.00417915	0.0100475	0.00919765	0.00346823	0.00409965	0.00975277	0.0133531	0.00179389	0.01092	0.00463479	0.00828894	0.0134538	0.00565537	0.00700518	0.0125384
5.9951e-06	2.28599e-05	0.000328294	0.00137719	0.000384654	0.000723697	0.000759109	0.000664771	3.97997e-05	0.00215613	0.0020418	0.00094256	0.00116238	0.00318049	0.00225358	0.00144007	0.00244193	0.000849744	0.00153617	0.00266748	0.00281544	0.00307072	0.00217245	0.00392469	0.00328627	0.00373725	0.00745645	0.00406573	0.00547402	0.00326777	0.00267056	0.00457124	0.00855924	0.00417874	0.00588843	0.00148767	0.0193655	0.00652714	0.00973147	0.00707004	0.00622711	0.00471913	0.000701302	0.00738417	0.00429725	0.0213008	0.00456704	0.0019879	0.0122107	0.011922
1.69663e-06	0.000191542	0.000139554	0.000593632	1.23087e-05	0.000935294	0.000428877	0.00158135	0.000800184	0.000741543	0.00186057	0.000133397	0.000287985	0.00271733	0.00212912	1.95623e-05	0.00248551	0.00222453	0.00174938	0.00794268	0.00276542	0.00164836	0.0040643	0.00549118	0.005633	0.00394552	0.00669117	0.00822528	0.00498725	0.00172669	0.00508097	0.00480213	0.00993808	0.00421718	0.00788493	0.00199898	0.0113617	0.00916927	0.00514051	0.00485426	0.00553051	0.00785008	0.00704417	0.0154471	0.00838256	0.0240442	0.00946342	0.0077529	0.0125871	0.0137105
3.93252e-05	0.000369837	1.02869e-06	5.78936e-06	0.000164397	7.77651e-05	0.000117784	0.000804246	9.84716e-06	5.98833e-05	5.50736e-07	9.35664e-06	0.000104038	0.000772937	0.000102423	0.000182384	1.74485e-05	6.56479e-05	0.000239389	0.00039284	0.000134686	4.76721e-06	0.000697136	7.63594e-05	0.000158768	0.000223407	0.000380489	7.76639e-05	4.84837e-06	1.03117e-06	1.09467e-05	0.000460536	0.000511984	3.28637e-05	0.000405581	0.000249002	0.000361761	3.47688e-07	0.000101413	0.000265432	5.67613e-05	0.000128495	0.000529192	2.18252e-06	0.000467867	5.82096e-05	7.65393e-05	0.00138694	0.000567915	1.65246e-05
0.000204887	6.34365e-05	0.000976584	6.59615e-06	0.000482096	0.00129322	0.000254659	3.45643e-05	0.000177016	1.87048e-05	5.13597e-05	0.00259575	0.000458482	0.00265176	0.000468468	0.000487414	2.10452e-06	1.54893e-06	3.36916e-05	2.28559e-06	3.54182e-08	0.00020917	0.000465595	0.000140855	0.000244025	0.000410528	0.000298583	1.81087e-05	6.10694e-05	0.000227196	4.8711e-05	1.2758e-05	6.59527e-05	1.89399e-06	0.000121309	0.000406392	0.000396426	7.68139e-06	7.44108e-05	4.78209e-05	0.000441581	0.000243332	0.000130037	0.000307458	0.00159187	8.22664e-05	2.98248e-05	2.85984e-06	0.000171623	1.49119e-06
5.59668e-05	8.71068e-05	1.14925e-05	0.00023974	6.49509e-05	0.000272926	0.00178261	0.000268372	0.000122452	0.000994925	0.00109005	1.04731e-05	8.0435e-05	0.00028982	0.000300401	5.73431e-05	9.9889e-06	0.00102283	0.00019447	0.00252492	0.000105558	0.000803676	0.000448925	0.0022708	0.000948612	5.567e-05	0.00195199	0.000257842	2.16333e-05	0.00102115	5.01376e-05	5.41646e-05	0.0012615	5.88809e-06	0.00322733	0.000471725	0.00161307	0.000390175	0.000348258	0.000335485	0.000492139	0.000281619	0.000135876	0.000961658	3.23925e-05	0.000667328	0.000431621	0.00077335	0.000150255	0.000269002
0.000345875	0.000771573	0.000625561	0.00163137	0.0012109	0.0014678	0.000238547	0.00045724	2.1963e-05	0.000128025	0.000278281	0.00139328	0.00243777	0.00146103	0.000778163	0.00229524	1.25502e-05	6.07913e-05	1.42099e-05	2.58185e-06	0.000383183	0.000338541	0.00216494	0.000429113	0.000603364	0.000982039	0.000538504	0.000368168	2.30224e-05	5.7315e-10	2.92872e-06	0.000373487	0.000703548	3.24879e-05	0.000164296	0.000238861	0.000319431	7.25393e-05	0.000166559	6.58053e-07	0.000107597	0.00015584	1.13315e-05	2.16179e-05	0.000134569	3.01916e-07	0.000694095	7.53223e-05	0.000278056	0.000299862
2.38094e-05	0.000761321	0.000306362	5.39545e-05	9.20875e-06	5.19422e-05	0.000742345	0.000548513	2.27083e-06	1.32623e-05	3.87577e-06	0.00160004	4.46293e-05	0.00128987	0.000929616	0.000633365	0.000206761	0.000577436	0.000630998	0.000313625	1.78355e-05	0.000185569	0.00111813	0.00023729	1.95617e-05	0.000401165	0.000178504	0.00161148	0.000341841	0.000363822	0.000414449	0.000634806	0.00104209	0.000959068	0.0003012	0.0033741	0.000312277	0.000274369	0.00265203	7.54115e-05	0.000558514	0.000174344	0.00155973	0.00130757	0.00164654	0.000363902	9.9442e-07	0.000794154	0.000134215	0.000742404
9.50987e-05	0.000819277	0.000188585	0.000223692	3.50133e-05	0.000450712	0.000164799	0.00043198	0.000642217	7.98966e-05	0.00158197	0.00107778	7.0773e-05	0.000243615	0.000546698	4.31025e-07	0.000180955	0.00024013	0.000220941	0.00170409	7.43505e-05	4.0833e-06	0.000963367	3.48509e-07	0.000205798	0.000763806	0.000620831	9.92498e-05	0.000121836	0.000249383	0.00109361	0.000782181	0.00031004	0.00011102	0.000782587	0.00112521	0.000236337	0.000422855	8.34866e-05	0.000402641	0.00019564	0.0027593	0.000499213	0.000705179	0.00020251	0.00182227	2.04291e-05	0.00221175	0.00384352	0.000196067
0.000600952	0.000465478	3.14986e-05	0.000314198	0.000126894	0.00147996	0.00131696	1.86101e-05	2.30039e-06	0.00062337	0.00119674	7.11324e-06	0.000146256	0.000142035	0.000231001	3.20892e-06	0.000334716	0.0004175	0.00108128	9.15211e-05	0.00012354	0.000987139	0.00146752	0.00107823	0.00018547	6.38583e-05	0.00235576	2.58742e-05	3.18736e-05	0.00013935	0.000296961	3.39676e-05	0.000904382	0.00129508	0.00114283	0.000414493	0.00021817	0.000260338	1.98157e-05	0.000522492	1.84904e-05	0.00564189	0.000529129	0.000291602	0.00119917	3.55501e-05	0.00155334	1.24833e-05	0.000920513	4.82471e-05
1.79427e-05	0.000179667	5.55458e-05	8.16099e-05	2.26153e-05	2.35976e-05	0.00124878	6.14121e-05	0.000767424	0.00178067	0.00193993	0.000153913	5.79926e-05	0.00103808	0.00144453	0.000684456	0.00103111	0.000810714	0.000146706	0.00137717	0.000110959	0.000177659	0.00114342	0.00023891	0.000274662	0.000116551	0.00058231	0.000822543	0.000160985	0.0017961	0.000477634	9.76421e-05	0.000604489	0.000422915	0.00102485	0.00136344	0.00132853	0.000220092	0.00105884	0.0006192	0.00151455	0.00229399	0.000834854	0.00124877	0.000866428	0.000929435	0.000718894	9.41508e-05	0.000816946	0.00191702
3.27623e-05	0.000176663	0.000477165	6.87759e-08	3.73539e-06	4.78572e-06	9.30142e-05	0.000345308	2.76196e-06	0.00116306	0.00045872	0.000493507	8.38036e-05	7.80145e-07	0.000943516	0.00220942	0.00114338	0.000833688	0.000559619	0.000179482	0.00192208	0.000413873	0.000533283	1.51475e-05	0.0011214	0.00133064	0.00103625	0.00168183	0.00022491	0.000606882	0.00151986	3.99558e-05	0.00281635	0.00115118	0.000623496	0.00127593	0.00269844	0.000759465	0.00287677	0.00058752	0.00180815	0.000659354	0.0025492	0.00231205	0.00151896	0.00399982	0.0012375	0.00217174	0.00175235	0.00231454
0.000227157	0.000225224	0.000163877	0.000869679	2.59637e-05	0.000280006	0.00362059	0.000191706	0.000941507	1.78206e-06	0.00375885	0.000176116	0.000224308	0.000352259	0.00148709	0.000149374	0.000205218	0.00211466	1.06085e-05	0.00117676	0.00113806	0.000522667	0.00168462	0.00339745	0.00208966	0.000935191	0.002549	0.0014338	0.000393367	0.000442672	0.00061526	0.00124751	0.00312875	0.000584291	0.0037805	0.000683235	0.00298163	0.000979226	4.30098e-07	0.000793369	0.00154238	0.00149948	0.000119743	0.0022804	0.0025074	0.00132491	0.00327545	1.12664e-05	0.00170222	0.00300103
5.75153e-05	0.00107541	0.000113314	0.000239165	0.000978269	7.58727e-05	0.0020641	0.000221035	0.00174151	0.000180161	0.00322353	0.000813917	0.000115691	0.000204753	9.34092e-05	0.000376885	0.000451944	0.00103997	0.000454629	0.000742673	5.7032e-06	0.00278038	0.000200776	0.00324592	0.00652807	0.000259244	0.00382292	6.60016e-05	8.68734e-05	9.91175e-06	0.000151237	0.000206716	0.00205376	0.00065673	0.00086717	0.00154571	0.00273658	0.000802006	0.00175833	0.00160834	0.000666087	5.50361e-06	0.000653536	0.000961868	1.02707e-08	0.00082771	0.000941604	0.0025035	0.000119552	1.62028e-06
5.63788e-05	0.000414773	2.61528e-06	5.00706e-05	0.00011662	0.000633837	0.000438878	0.000412198	0.000259413	0.000520397	0.00175588	0.000693091	0.000861256	0.000528194	0.000301071	0.000190395	0.000688139	0.00138641	0.000702616	0.00268175	0.000295382	0.000539118	0.00117357	0.00134249	0.000358125	0.00110067	0.000297255	0.00235569	0.000222003	0.00110617	0.000973995	0.00150704	0.00225711	0.00122116	0.00225138	0.0044462	0.00242763	0.00255043	0.00444059	0.00153556	0.00393604	0.00340743	0.0013247	0.00204633	0.00193591	0.00294182	0.00271219	0.000772888	0.00204771	0.00195216
0.000125069	0.000164155	0.00107936	0.00235181	0.00111907	0.000919116	0.000322856	0.00168139	0.000520553	0.000152426	0.000212479	0.000841986	0.000601922	0.0020432	0.000556178	0.00911575	1.97884e-05	1.30391e-05	0.00143768	0.000987484	0.000255901	0.000528605	0.000315687	0.00227416	0.000401892	8.63986e-05	0.00102854	2.87679e-05	0.000245062	2.79174e-06	2.45041e-05	0.000190343	4.18768e-07	5.94759e-05	4.86674e-05	0.00116428	1.4255e-05	0.000975874	1.68643e-05	9.08786e-05	8.09001e-06	1.97214e-06	0.000545798	0.00143491	0.000559017	0.000293863	0.00443485	0.000210255	0.00043235	0.000556022
8.73441e-05	3.06354e-05	6.33672e-06	0.00133253	5.67203e-05	0.00158392	0.00184211	0.000421534	0.000114637	0.00101579	0.00199247	0.00100255	5.53348e-05	0.00195287	0.00213128	0.000846893	0.000620591	0.00354565	0.000318137	0.00337485	0.000727934	7.00635e-05	0.00156993	0.00153035	0.00134278	0.000276274	0.00192087	0.00280865	0.000850855	0.00331273	0.000683444	0.000438012	0.00194467	0.00121778	0.00363247	0.00184521	0.00314869	0.00197576	0.000563724	0.00190413	0.00162446	0.0011761	0.000590851	0.0023211	0.0035414	0.00342083	0.00134531	0.000295792	0.00175384	0.00151385
0.000714834	0.00299086	3.75103e-05	9.27147e-06	0.000729217	0.000715202	0.000825192	0.000320533	0.00338516	0.000978106	0.000571481	0.00152342	0.000735058	0.00173292	0.00130464	0.000847842	0.00102852	6.6668e-06	0.000946513	0.000430551	4.64133e-05	1.63289e-06	0.00146708	1.30661e-05	0.000137974	0.000719963	2.11659e-05	0.00195213	0.000482925	0.00262917	0.000734749	0.000579298	0.000157563	0.00242101	0.000824399	0.00490326	0.00109515	0.0013018	0.00476748	0.000393521	0.000464913	0.00392254	0.00230789	0.00112731	0.003099	0.00126388	0.000400391	0.00286302	0.00106045	0.00447344
[truncated: 4 more rows]
[truncated: 23 more columns]

## Sheet: FigS1c_reachFN2
0	0.000292679	2.44475e-05	7.83664e-07	2.8836e-08	3.62193e-05	4.80292e-06	5.69694e-05	0.000546466	0.000171429	0.000116714	3.18165e-05	0.000336455	0.000229138	2.99191e-05	0.000308305	0.000666279	9.36504e-05	0.00025125	0.00178621	0.000466944	0.000483542	1.94968e-08	0.000154588	2.08736e-05	2.67487e-07	1.52827e-05	0.000361697	9.98527e-06	1.62855e-09	2.3701e-05	0.000155793	1.58149e-05	0.000104453	0.00028876	0.000131717	0.000364847	2.98272e-05	0.000426843	5.2155e-05	0.000452181	0.00115626	0.000180503	6.10802e-05	6.98123e-05	0.000338605	7.44588e-06	2.7443e-05	0.000408411	0.000134991
[truncated: 72 more rows]
[truncated: 23 more columns]

[truncated: 99 more sheets: FigS1c_spontFN, FigS1c_wji_vs_distance_MG, FigS1c_n_MG, Fig2a_TY, Fig2a_MG, Fig2b-e_TY, Fig2b-e_MG, Fig2f_TY, Fig2f_MG, Fig2g_TY, Fig2g_MG, Fig2h_TY, Fig2h_MG, Fig3a-b_TY, Fig3a-b_MG, Fig3c_TY, Fig3c_MG, Fig4_TY, Fig4_MG, Fig4_pvalues …]
